# Supplementary material
Source: publisher figshare collection journal article supplement (https://gsajournals.figshare.com/ndownloader/files/27678714)
Supplement: Supplementary file 1 [file 27678714]

## Sheet: Total Proteins
Supplemental File S3
Total raw Brachypodium PM proteome dataset
															NA					CA 2 days					CA 4 days					CA 6 days					CA 8 days
Bradi no.	Anova (p)	Adjusted (p)	Dunnet's (CA2)	Dunnet's (CA4)	Dunnet's (CA6)	Dunnet's (CA8)	Min Dunnet's	Max fold change (/NA)	Min fold change (/NA)	Fold change (CA2/NA)	Fold change (CA4/NA)	Fold change (CA6/NA)	Fold change (CA8/NA)	Peptide Sequence	Experiment 1	Experiment 2	Experiment3	Experiment4	Average	Experiment1	Experiment2	Experiment3	Experiment4	Average	Experiment1	Experiment2	Experiment3	Experiment4	Average	Experiment1	Experiment2	Experiment3	Experiment4	Average	Experiment1	Experiment2	Experiment3	Experiment4	Average
Bradi1g00700.1	0.000930051	0.00196961	0.62839	0.111106	0.0430104	0.354177	0.0430104	1.59902	0.508909	0.757856	0.508909	1.59902	1.33918	MARPQLEVLSKLDAAKTQWYHFTAIVIAGMGFFTDAYDLFCISLVTKLLGRIYYHIDGSPTPGSLPPNVAAAVNGVAFCGTLSGQLFFGWLGDKMGRKKVYGMTLMCMVLCSIASGLSFGQTPTSVMATLCFFRFWLGFGIGGDYPLSATIMSEYANKKTRGAFIAAVFAMQGFGILTGGVVTLVISSAFRAAFDAPAYKDGAMASTPPQADYVWRIILMFGAIPALMTYYWRMKMPETARYTALVAKNAKQAAADMSKVLQVEIGAEEDNNKAGGAVEENRNSFGLFSAEFLRRHGLHLLGTATCWFLLDIAFYSQNLFQKDIFTAINWIPKANTMSALEEVYRIARAQTLIALCGTVPGYWFTVALIDRIGRFWIQLGGFFFMTVFMLCLAAPYHHW…	50253.2	28664.2	58045.6	66055.7	50754.7	24915.3	41453.8	40303.2	47186.6	38464.7	27600.5	33916.6	19807.3	21993.7	25829.5	117385	61492.2	82439.9	63314.7	81157.9	52170.6	71445.8	75978.9	72284.1	67969.8
Bradi1g01190.1	0.0116737	0.017936	0.244515	0.389455	0.991079	0.106627	0.106627	1.70006	0.541369	1.5529	0.541369	1.10106	1.70006	MAGKIKTVVVLVQENRSFDHMLGWMKSLNPEIDGVTGTETNHVIAGDASSKAVVFSDKSEYVDPDPGHSIQAIYEQVYGTPFVDATATPITPSSPATMAGFAQQAEKEKPGMSETVMSGFKPDAVPVYKELAKEFAVCDRWFASNPASTQPNRLFVHSGTSHGLVSNDTKTLVAGLPQKTIFDSLDDAGLSFGIYYQFPPATLLYRNLRQLKYLDNFHQYDLSFRRHCREGKLPNYVVVEQRYFDLANIGLPGNDDHPSHDVGEGQRFVKEVYEALRAGKQWEETLLVVTYDEHGGFYDHVPPPSGAGVVPSPDGIVSAPPFFFNFDRLGVRVPAFFISPWIEPGTVVHRPAHGPEPTSEFEHSSIPATVKAIFGLPSFLTKRDAWAGTFDTVLTRQTP…	2331.66	4305.63	4714.77	6024.47	4344.13	4044.74	6207.41	7406.51	9325.4	6746.01	2576.57	4493.11	1001.67	1335.77	2351.78	2271.17	3130.83	6013.5	7717.16	4783.17	7950.88	8046.25	7693.18	5850.89	7385.3
Bradi1g01560.1	0.00433046	0.00761642	0.850837	0.00142202	0.29854	0.255311	0.00142202	0.929943	0.587495	0.929943	0.587495	0.84655	0.837423	MEGKLDAAIESLLNVEKQCRLAGDVAGTRKAAVDIVELCHKEGAWKTLNDQIVVLSKRRGQLKQAITAMVQKAMEYIDVTPDVDTRIELIQTLSSIAAGKIYVEIERARLIKRLAKIKEEQGKIDEAADIMQEVAVETFGSMAKTEKIAFILEQVRLCLDRQDYVRAQILSRKISPRVFDADTSKEKKKPKEGDNMVQEAPAEIPSLLELKRIYYELMIRYYSHNNDYLEICRCYKSIYDIPSIKDDPAKWIPVLRKICWYLVLAPHDPMQSSLLNATLDDKNLSEIPNFRLLLKQLVTMEVIQWTKLWEFFKDEYENEKNFLGGPLGTKAAEDLKLRIIEHNILVVSKYYSRITLKRIADLLCLSLQEAEKHLSDMVNSKSLIAKIDRPMGIVSFRTA…	9388.06	11550.8	13241.9	13125.6	11826.6	9590.98	11710	11856.8	10834.5	10998.1	6679.25	6362.59	6796.89	7953.58	6948.08	11913.1	8088.65	9852.09	10193.4	10011.8	8121.45	8416.34	12422.3	10655.4	9903.87
Bradi1g01580.1	4.11716e-09	1.23423e-07	0.999992	1	2.56425e-08	2.59924e-05	2.56425e-08	64.8131	1.02231	1.3322	1.02231	64.8131	58.9524	MAAAAVLRNAGTRRVLAYPTFRAAVISGPAALPDASAAAGTQTAPPAFAAGGGLWARSMATFTRTKPHVNVGTIGHVDHGKTTLTAAITKVLAEAGSAKAVAFDEIDKAPEEKARGITISTAHVEYETAKRHYAHVDCPGHADYVKNMITGAAQMDGGILVVSAPDGPMPQTKEHILLARQVGVPSLVCFLNKVDAVDDPELLELVEMELRELLSFYKFPGDDIPIIRGSALSALQGTNDEIGKNAILKLMDAVDEYIPDPVRVLDKHFLMPIEDVFSIQGRGTVVTGRVEQGTIKTGEDVEILGLSETGPLKTTVTGVEMFKKILNHGEAGDNVGLLLRGLKRGDVQRGQVVCKPGSVKTYKKFEAEIYVLTKDEGGRHTAFFSNYRPQFYFRTADIT…	1046.88	1131.1	289.293	240.969	677.06	458.943	841.505	1663.69	643.793	901.983	197.673	334.667	1309.5	926.819	692.165	49350	29454.6	43762.6	52962.3	43882.4	33405.8	35651.8	50679.4	39920.3	39914.3
Bradi1g01920.1	0.00938146	0.0147501	0.894923	0.727443	0.0402338	0.12259	0.0402338	1.83469	0.711065	1.20248	0.711065	1.83469	1.65936	MATAAATVTTFLLLVVSVAGAMAATKAPSSFRTVYAFGDSFTDTGNTRSTTGPYSFGYVSSLPYGATFFHRPTNRYSDGRLVVDFLADHLRLPSFLPPYLPNSSPNSNSSDKSSSSNKSGAVGVNFAVAGATAIEHDFFVRNNLTVDITPQSIMTELAWLDKHLAAAEKKKKAGKGAGKKKDLEEEEGIGEALFWVGEIGANDYAYSFMAADTVSPKNIQAMAVARVASFVEELLKRGAKYIVVQGLPLTGCLPLAMTLARQEDRDNISCVASVNQQSYDHNRLLQADLNRLRQKHPGASIAYADYYAAHLAVMRSPARHGFTEPFKTCCGTGGGAYNFEIFSTCGSPEVATACAQPAKYVNWDGVHMTEAMYKVVAGMFFEDNSGKYCRPAFSSLLTK…	19338	24646.1	18225.5	12233.2	18610.7	9355.11	11917.9	30994.5	37248.9	22379.1	15528.3	13026.4	12114.5	12264.5	13233.4	36841.8	26821.9	39189.5	33726.6	34145	23664.5	26071.5	35441.4	38349.9	30881.8
Bradi1g01930.2	0.578708	0.594575	0.935777	0.86847	0.999971	0.394539	0.394539	1.4613	1.02369	1.17959	1.22711	1.02369	1.4613	MIKQILGRFPKKPSKSGDKDPTGRSSPSVSNPAFGPRGAERASNLSGQTPVISSSGLSYGSGLHPGNGNSRVNGNSVSSGFELLPSFKDVPNTEKHNLFVRKLNMCCVTFDFSDPAKSIKEKEIKRQTLLELVDYISSANGKFPDIIMQETTKMVSANLFRTLTTPPRENNISAFDLEEDEPVMDPAWSHLQIVYELFLRFIQSPETDAKLAKRYIDHSFVLRLLDLFDSEDPRERDYLKMILHRVYGKFMVHRPVIRKAINNTFYQFIYETEKHNGIAELLEILGSIINGFALPLKEEHKLFLVRALIPLHKPKCIGTYHQQLSYCITQFVEKDCKLSDTVIRGLLKYWPITNSTKEVMFLGELEEILEATQPAEFQKCMVPLFRQIARCLNSSHFQV…	11574.2	11553.7	14323	15811.4	13315.6	10209.1	17933.4	15707.5	18977.5	15706.9	15926.8	22221.4	20361.5	6849.25	16339.7	11574.8	11329.6	15699.8	15919.8	13631	13783.2	33401.6	12508	18139.5	19458.1
Bradi1g01936.1	1.48868e-05	5.924e-05	0.0081471	4.87253e-05	0.000240799	1.00783e-05	1.00783e-05	1.57746	1.27829	1.27829	1.50171	1.40981	1.57746	MWRGDNMRHWFCCNCRFGGEEDDHDMEHSKAKGNKMDAKQKSSRPADQPEIDFFPPTIDVPELSFEDLKQKTDNFGSNSLIGEGSYGRVYHATMDDGRQAAIKKFDASENEPNDEFLKQVSLVSKLNHENLVEMLGYYVEGNYRILAYEFATMGSLHDVLHGRKGVQGAQPGPVLDWMQRVKIAIEAAKGVEYLHEKVHPSIIHRDIRSSNVLLFEDFKAKIADFNLLNQAPDMAARLHSTRVLGTFGYHAPEYAMTGQLTQKSDVYSFGVVLLELLTGRKPVDHTMPRGQQSLVTWATPRLSEDKVKQCIDPRLKGEYPPKGVAKLAAVAALCVQYEAEFRPNMSIVVKALSPLLQQRPVVPAASEPVPATET	282815	325883	383148	365351	339299	432008	459943	414611	428329	433723	473163	572192	477177	515582	509529	439093	472660	481472	520170	478349	567071	545118	540453	488287	535232
Bradi1g02090.2	0.00300919	0.00554488	0.687959	0.463188	0.00661242	0.73938	0.00661242	1.10419	0.622648	1.10419	0.861043	0.622648	0.903686	MSSSDNPDTVTDRAFGFGKNKDDDKKKDDKKNDEEGNSGGGGFIEKVKDFIHDIGEKIEEAVGFGKPTADVSGIHVPHIGLDGADFIVDVLIKNPNPVPIPLVDIDYLVDSDGRKLVSGLIPDAGTIRAHGQETVKIPISLVFADIKNTYRDIQPGSIIPYLVRVVLLVDVPVFGRIKIPLEKSGKVPIPYKPDVDVDKIKFHHFSFEETTATIHLSLENKNDFDLGLNLLQYEMWLGDDRVADAELTETTKIDKQGITKMQIPFTFRPKDLGSAVWDMIRGRGTGYTIKGKIDVDTPFGNMKLPISKVGGTTRLKKDSDDDDDEE	294892	376485	472866	423778	392005	342747	449189	439150	500310	432849	292920	362127	294323	400762	337533	260082	276600	218541	221102	244081	301207	345014	387163	383614	354249
Bradi1g02100.1	0.0109314	0.016911	0.975308	0.998588	0.0145298	0.141911	0.0145298	1.01891	0.692376	0.959405	1.01891	0.692376	0.802439	MARRAAAWEQGGDEYDYLFKIVLIGDSGVGKSNLLSRFTKNTFSLDSKSTIGVEFATRTIEVEGKTIKAQIWDTAGQERYRAITSAYYRGAVGALLVYDVTKGATFDNVKRWLKELRDHADSNIVIMLIGNKMDLKHLRSVAQEDAASFAEREGLSFIETSALDATNVDRAFQTVLGEIYRIISKKALSTDDSGAGAVKEGQSIQVSAGDSSSVSSRCCSF	46288.3	51632.2	66998.9	51867.7	54196.8	37872.2	58643.3	50554	60917.2	51996.7	53895.1	62404.2	50752.5	53835.4	55221.8	35977.7	42337.3	41394.3	30389	37524.6	43344.2	42875.5	41955	45783.7	43489.6
Bradi1g02310.1	0.541895	0.561888	0.999994	0.999088	0.956634	0.383385	0.383385	1.79426	1.02665	1.02665	1.09576	1.2707	1.79426	MDDYAREMMELKTLVTRTLEKKGVLAKIRAELRASVFEAIEEEDRVVEENDDGGNPALLGSCNDRAKQLHASASGRLLTALIGEYLEWAQLSHTMKVYLPECNLPKDFWKNELKDFSSKNGAEGSRSAESGPMLLDVLEGYLKYENLSQTRMAGRRIGNSESEQTLNTEHRNMRRPPSSSSVGVLPPMGRQMPSSQTSDRRGGSSASNTRKDEYNWGYDADDISEEVLRATSGVENLQLDRKARNLTTSWRQWCRVTAPMRSWLAWFPLELLYPLLVGTGSCSALFPCCNPTN	8908.62	7315.09	9291.47	11064.5	9144.92	5774.53	9404.63	8294.22	14081.2	9388.64	9985.07	10116.5	11130.2	8850.63	10020.6	6992.46	3739.57	12576.3	23173.5	11620.5	21264.9	30247.8	10298.7	3822.19	16408.4
Bradi1g02440.1	0.126314	0.147275	0.110734	0.441973	0.999814	0.23257	0.110734	0.987476	0.766724	0.766724	0.855014	0.987476	0.810691	MRTLWGGEDLAFLLRCCSLLLLLASFSHGADMPTGSSLSPGNQAAPWLSPNSTFSLAFAPSPSSPSLFVAAVTYAGGVPVWSAGAGAAVDSGGSLRLSSTGDLQLVNGSGAVLWSSGTGGRGVAAAALQESGNLVLKNSTGGALWQSFEHPTDTVVMSQSFTSSMNLTSGNYAFAVDRPSGNLTLRWSSSSSGSGGGNAVKYFNKGYNSTFTGNQTLTSPSLVMQSNGIVSLTDTSLSSPAVVAYSSNYGESGDMLRFVRLDADGNFRAYSAARGSSSATEQWSAVVDQCEVFGYCGNMGVCGYNGTSPFCSCPSQNFRPKDAADPRSGCERKVELVNCPGNSTMLELANTQFLTYPPEITTEQFFVGITACRLNCLSGGSCVASTALADGSGLCFLKV…	211909	139789	154694	120811	156801	108650	132302	100299	139641	120223	134399	115287	139090	147491	134067	156176	151711	177288	134173	154837	138583	115629	136312	117944	127117
Bradi1g02510.1	0.00682481	0.0111461	0.96817	0.0971803	0.0558454	0.0254582	0.0254582	2.2738	0.802537	0.802537	1.98192	2.10617	2.2738	MEASAGLVAGSHNRNELVVIRRDGEPGQRPLKQHNSRACQICGDDVGLTPDGEPFVACNECAFPVCRDCYEYERREGTQNCPQCKTRFKRLKGCARVPGDEEEEGADDLENEFNWRDRDADSQYVAESMLHAHMTYGRGGDIDGVPQPFMPIPNVPLLTNGQMVDDIPPEQHALVPSFMGGGGKRIHPLPYADPNLPVQPRSMDPSKDLAAYGYGSVAWKERMESWKQKQERLHQTRNDGGKDWGGDGDDADLPLMDEARQPLSRKVAISSSLINPYRMIIIIRLVIVGFFFHYRVMHPVNDAFVLWLISVICEIWFAMSWILDQFPKWFPIERETYLDRLTLRFDKEGQPSQLAPVDFFVSTVDPLKEPPIVTANTILSILAVDYPVDKLSCYVSDDG…	5866.68	3003.74	2779.95	3354.26	3751.16	2566.26	2584.06	2523.11	4368.33	3010.44	6490.9	5009.23	7039.67	11198.2	7434.49	7086.81	5041.35	12517	6957.08	7900.56	11365.5	6920.6	8283.02	7548.44	8529.38
Bradi1g02560.1	0.0150319	0.0224315	0.0693294	0.00991876	0.0403036	0.00808774	0.00808774	1.40347	1.28276	1.28276	1.39338	1.31426	1.40347	MGFWERDHEWDWKKTAIWAAVLLLALGVLALLIVAFAVASPPKATADDALLQRFTLSSTPSSPTPNSTISYNATVAVSLYNPNIHRAISYGAMAAAFSFNGTRFDDQATVAAFEQGARKTTTVRVTVGGADRAVRLSAAGVAEFGREKGDGRFMVEVRMESVMRYKGRKTDCPVVVVCPLLLQLVDPAVAATAFQKTKCTILRAKKSGC	156027	185998	204607	213348	189995	243264	255769	242975	232866	243718	246012	298365	264248	250314	264735	212529	301671	244112	240502	249703	267272	300777	290630	207927	266652
Bradi1g02580.1	0.000523193	0.00119625	0.0740235	0.0300304	0.000506558	0.000333493	0.000333493	0.596639	0.147068	0.596639	0.520853	0.186271	0.147068	MADGEDIQPLVCDNGTGMVKAGFAGDDAPRAVFPSIVGRPRHTGVMVGMGQKDAYVGDEAQSKRGILTLKYPIEHGIVSNWDDMEKIWHHTFYNELRVAPEEHPVLLTEAPLNPKANREKMTQIMFETFNAPAMYVAIQAVLSLYASGRTTGIVLDSGDGVSHTVPIYEGYALPHAILRLDLAGRDLTDSLMKILTERGYSFTTTAEREIVRDIKEKLAYVALDYEQELETAKSSSTVEKSYELPDGQVITIGAERFRCPEVLFQPSLIGMEAPGIHETTYNSIMKCDVDIRKDLYGNIVLSGGTTMFPGIADRMSKEITALAPSSMKIKVVAPPERKYSVWIGGSILASLSTFQQMWISKGEYDESGPAIVHRKCF	15808.7	21626.8	10279.2	7144.57	13714.8	10717	8704.8	7971.22	5338.16	8182.8	5720.6	8751.63	7462.28	6639.12	7143.41	1825.98	3970.18	2104.73	2317.78	2554.67	1616.05	2162.42	2383.87	1905.72	2017.01
Bradi1g02810.1	0.000855493	0.0018465	0.0125117	0.0171843	0.000257581	0.0011071	0.000257581	0.573908	0.299862	0.551926	0.573908	0.299862	0.393788	MAHLAGGGGDELVPTLSSLETVYGAGEEEEEEARVRFGRLGDRFRALYSASPALFARSPGRVNLIGEHIDYEGYSVLPMAIRQDMIVAISKAAHGQVRVANVEDKYAACVYPADPDKEIDIKNHKWGHYFMCGYKGVYEYGRSKGIDMGEPVGLDVVVDGTVPLGSGLSSSAAFVCSATIAIMGILEKNFPKKEVAQFTCQSERHIGTQSGGMDQAISIMAKPGFAELIDFNPIKATDVQLPQGGTFVIAHCLAESKKAETAATNYNNRVVECRLAAIVLAIKLGMDTNKAISSVTTLSDVEGLCVSFAGKEGSSDPVVAVKKLLHEEPYTTEEIEKIVGKSLASAFESSPTSLDVLRAAKQFKLFQRAAHVYSEARRVYAFRDTVSSKLSEEDMLKKL…	21409.9	36859.8	26561.7	20202.4	26258.5	9165.89	18263.2	11462.8	19079.1	14492.7	15044.6	14617.2	12204.6	18413.4	15069.9	10676.5	11215	5488.06	4116.06	7873.91	5056.98	12858.9	9600.37	13844.8	10340.3
Bradi1g02940.1	3.8375e-06	2.11297e-05	0.0261434	8.28156e-05	6.50435e-07	1.15113e-05	6.50435e-07	0.737191	0.28903	0.737191	0.48352	0.28903	0.405409	MPALARSPSFAVLAVLALATAVAGEVFFQEKFDDGWVDRWVKSEWKKEDNTAGEWNHTSGKWNGDAEDKGIQTSEDYRFYAISAQFPELSNKDKTLVLQFSVKHEQKLDCGGGYVKLLGADIDQKKFGGETPYSIMFGPDICGYATKKVHAILTKNGKNHLIKKEVPCETDQLTHVYTLIIRPDATYSILIDNAEKQTGSIYDDWDILPAKKIRDPEAKKPEDWVDEEYIPDPEDKKPEGYDDIPKEITDPEATKPEDWDDEEDGEWTAPTMPNPEYKGPWTQKKIKNPEYKGKWKAPLIDNPDFKDDPYIYAFDSLKHIGIELWQVKSGTLFDNILITDDPEYAKKVAEETWAKHKDAEKAAFDEAEKKRLEEVCDIFSARMMTLMTMKMLMTQMRTR…	228042	282444	231963	178541	230247	136181	146446	189054	207264	169736	90477.4	102756	104158	147926	111329	50752.4	62771.4	79944	72725.7	66548.4	107419	100785	81616.7	83556.9	93344.4
Bradi1g02960.1	0.00445528	0.00780543	0.694506	0.0303633	0.00534515	0.00700771	0.00534515	0.748148	0.0521584	0.748148	0.272137	0.0521584	0.0909898	MSSKKIELDHKDMVHDSAIDYYGKRLATASSDSTVKIVNIGGASAPSQLLATLTGHYGPVWRVGWAHPKYGSILASCSYDGRVIVWKEGATGQWSQAHVFSNHKSSVNSIAWAPYELGLCLACGSSDGSISVMSMQPDGGWDTATIERAHPVGVTAVSWAPATALGSMVGSDQLVHKLVSGGFDCVVKVWEFVNGGWKVESALVSDMHAECVRDVSWAPVLGLAKSTIASASQDGKVVIWTKGKGGDKWEGKMMRDLEAPVWRVSWSLTGNILSVAAGEGAITLWKETSDGQWEQLWTKASGEPQEQATEEVIAAQ	0	20068.3	20946.2	22157.3	15792.9	7126	17559.1	8646.93	13929.8	11815.5	2664.07	6104.87	8137.53	284.881	4297.84	1813.54	770.775	314.356	396.265	823.733	1489.84	2630.97	967.378	659.792	1437
Bradi1g03420.1	0.0286497	0.039237	0.968613	0.892532	1	0.0417906	0.0417906	1.35562	0.912534	1.05985	0.912534	1.00141	1.35562	MGARCSKLSVCWWPPHFKSPRLENGAAGEDGSGVPVFTEYSLDELRAATDGFAPDRIVSEHGEKAPNVVYRGTLFSSGHTVAIKRFGRSAWPDSRQFVEEARAVGLLRSGRLSNLIGCCCESGERLLVAEFMPHDTLAKHLFHWETKPLSWPMRVRAALYVAQALEYCTNKGRALYHDLHAYRVLFDVDGNPRLSCFGLMKNSRDGKSYSTNLAFTPPEYLKTGRVIPESVVYSFGTILLDLLSGKHIPPSHALDLIKGKNYMVLMDSCLEGHVSSSDGNEMMRLVSRCLSYEARERPNLKAVVSALANLQRDASAPSRTLLGIPQDTEENSAQVSFSATGKAYATADLEGVHEILTNDGYKEDDIATYKVSLDSWPGQPAESLRVKKNGDDAFQSKDF…	7203.93	7474.74	7365.33	9170.4	7803.6	6168.86	8909.73	8446.14	9557.93	8270.66	6490.82	7579.98	6135.62	8277.76	7121.05	5631.42	8273.28	7454.85	9898.75	7814.58	10813.1	12645.3	9989.14	8867.29	10578.7
Bradi1g03490.1	0.0162241	0.0239982	0.0577929	0.0387753	0.00951754	0.0104255	0.00951754	0.495143	0.317508	0.495143	0.455391	0.317508	0.329575	MAHRVDNEYDYLFKIVLIGDSGVGKSNILSRFTRNEFCLESKSTIGVEFATRTLQIEGKTIKAQIWDTAGQERYRAITSAYYRGAVGALLVYDITKKQTFENITRWLRELRDHADSNIVIMMVGNKSDLNHLRSVQEEDGQALAEKEGLSFLETSALEALNVEKAFQTILSDIHQIISKKALAAQEAAGSGPPIQGTTINVADSSGNTKKGCCST	4160.76	11538.6	17570.7	22180.8	13862.7	6505.38	6144.89	7309.7	7496.16	6864.03	6872.29	8748.36	5188.81	4442.43	6312.97	5134.92	3768.36	3762.79	4940.06	4401.53	3823.62	7654.01	3670.1	3127.52	4568.81
Bradi1g03650.1	3.97054e-05	0.000134242	0.0316915	0.00170262	3.65173e-05	2.63067e-05	2.63067e-05	0.714716	0.343168	0.714716	0.573986	0.401785	0.343168	MGNCLGSRITHGSTHPAASGFFSRGTGKDGSRLSACSSRASSSSMPPSAKTEWEILQSANVKIFSYNDLRLATRSFRPTNVLGEGGFGPVYKGWIDENTLSACKPGSGIPVAVKRLNQEGLQGHREWLAEVNFLGQFCHPNLVKLIGYCLEDENRLLVYEYMPRGSLENHLFRRGSHIQPLPWNLRMKVALGAAKGLAYLHSAEAKVIYRDFKTSNVLLDTDYTAKLSDFGLAKDGPVGEKSHVSTRVMGTYGYAAPEYLSTGHLTAKSDIYSFGVVLLEMLSGRRAIDKNRPQGQHNLVEWARPYLTHSRKVFRVLDTKLEGQYSHRGAQTIAALAVECLSYDAKMRPSMDAVVSILEGIQGSSEADRKPATEKHQEPKGAAKNDPGAGACKHRRNNL…	20989	17519.2	19167.5	11774.7	17362.6	12342.6	11153	15086.5	11055.3	12409.3	10855.7	9702.39	8896.71	10408.8	9965.9	8480.61	10008	5316.53	4099	6976.04	6085.95	6725.21	5510.48	5511.54	5958.29
Bradi1g03700.1	2.02404e-05	7.58454e-05	0.0195218	0.00025931	1.57255e-05	3.52021e-05	1.57255e-05	0.684461	0.300685	0.684461	0.472857	0.300685	0.354213	MAPATPKTGLFVGINKGHVVTKRELPPRPSDRKGKITKRVHFVRNLIREVAGFAPYEKRITELLKVGKDKRALKVAKRKLGTHKRAKKKREEMSNVLRKMRSAGVADKKK	47528.7	58653.4	58857.6	43920.3	52240	26570.9	35694.3	43412.1	37347.7	35756.2	31297.2	29860.1	14184.6	23466.4	24702.1	21620.9	25918.8	7848.21	7443.12	15707.8	20126.4	14842.9	18642.7	20404.4	18504.1
Bradi1g03720.1	0.000201004	0.000520316	0.0713927	0.0316676	0.501069	2.28851e-05	2.28851e-05	1.50393	1.10559	1.20172	1.23553	1.10559	1.50393	MAPTKGEGPAIGIDLGTTYSCVGVWQHDRVEIIANDQGNRTTPSYVGFTDTERLIGDAAKNQVAMNPINTVFDAKRLIGRRFSDAPVQSDIKMWPYKVISGPADKPMIVVQYKGEDKQFSAEEISSMVLIKMREIAEAYLGVTIKNAVVTVPAYFNDSQRQATKDAGVIAGLNVMRIINEPTAAAIAYGLDKKATSVGEKNVLIFDLGGGTFDVSLLTIEEGIFEVKATAGDTHLGGEDFDNRLVNHFVQEFKRKHKKDISGNPRSLRRLRTSCERAKRTLSSTAQTTIEIDSLYEGVDFYSTITRARFEELNMDLFRKCMEPVEKCLRDAKMDKSTIHDVVLVGGSTRIPRVQQLLQDFFNGKELCKSINPDEAVAYGAAVQAAILSGEGNEKVQDLL…	442541	463498	523582	533063	490671	675749	583503	520338	579004	589649	584933	558274	568000	713755	606240	607492	535351	545534	481548	542481	751683	687680	763639	748737	737935
Bradi1g03750.1	0.00129599	0.00264492	0.0440735	0.000327864	0.664294	0.0815465	0.000327864	0.941499	0.71627	0.848599	0.71627	0.941499	0.86624	MANASSGAGVHDDCNLRFVELKSKRLHRFITYKLENQKEIVVENIGERTATYEDFVSKLPENDCRFAVYDFDFFTAEDVPKSRIFYIFWSPDTAKVRSKMLYASSNEKFKRMLDGIQVEMQATDPSEISIDEIKDRAR	223952	255441	260396	248336	247031	186931	198519	225119	227952	209630	187701	183919	171485	164659	176941	207463	241228	225217	256410	232580	200892	221240	189779	244043	213988
Bradi1g03760.1	1.76065e-07	2.01282e-06	1.2728e-06	6.12862e-08	2.75984e-06	1.1188e-05	6.12862e-08	14.0802	9.1758	10.3213	14.0802	10.1951	9.1758	MANATSGVSVAEECVKAFQELRTGRAHRFVVYKVNNTDADESAAEQVVVDKVGGRDAAFEDLVAALPADDCRYAVYDLDFTVAAATAAHADGEAPRSKIFFISWSPETAEVRSKMVYASSNEGFKKELDGTQIDVQATDPSELTLQILKDLAA	8899.02	10361.3	11054.2	11025.3	10335	105551	129973	91988.2	99166.9	106670	110491	172817	135815	162949	145518	99703.3	117018	91549.6	113193	105366	76626.1	104419	91017.8	107263	94831.6
Bradi1g03820.1	0.00132873	0.00270356	0.870701	0.624419	0.11466	0.00489748	0.00489748	1.09967	0.658757	0.935309	1.09967	0.800511	0.658757	MAAPPARARADYDYLIKLLLIGDSGVGKSCLLLRFSDGSFTTSFITTIGIDFKIRTVELDGKRIKLQIWDTAGQERFRTITTAYYRGAMGILLVYDVTDESSFNNIRNWIRNIEQHASDNVNKVLVGNKADMDESKRAVPTSKGQALADEYGITFFETSAKTNLNVEQVFFSIARDIKQRLSESDSKPEGGTIKIKPEGEADAAGAQKSACCGS	11003.1	9091.76	9733.97	7318.59	9286.86	8442.14	6763.85	10491	9047.29	8686.08	10553.3	10098.6	10098.1	10099.8	10212.4	7009.8	7634.58	7106.67	7985.86	7434.23	8016.3	5368.51	5508.13	5578.19	6117.78
Bradi1g03840.1	0.00386551	0.00687939	0.139128	0.00347369	0.0356669	0.00185351	0.00185351	0.701776	0.395489	0.701776	0.442655	0.600694	0.395489	MAVSELEVDGVVFPPLERPPGSAHAHFLAGAGVRGMDIGGNFIKFTAIGVYLQADAAVSSLAAKWAAKPAADLAADAAFFRDVVTGEFEKFTRVTMILPLTGAQYAEKVTENCVKYWQATGAYTDAEAAAVEKFREAFQPHSFAPGGSILFTHSPAGVLTVAFSKDSSVPASGAAAIENRPLCEAVLESIIGEHGVSPAAKLSLATRVAELLKAAEPVSVSL	39553.3	88005.6	92360.6	58533.3	69613.2	40270	34550	61459.5	59131.8	48852.8	27064.7	35088.5	26382.7	34722.5	30814.6	47005	31651.9	46634.4	41973.6	41816.2	20699.3	27617.4	26804.7	35003.6	27531.2
Bradi1g04070.1	3.40275e-06	1.9339e-05	0.0962891	0.000503223	9.99405e-07	8.44773e-06	9.99405e-07	0.779954	0.244398	0.779954	0.5406	0.244398	0.344537	MTFKRRNGGRNKHGRGHVKYIRCSNCAKCCPKDKAIKRFLVRNIVEQAAVRDVQEACVHDGYILPKLYAKVHHCVSCAIHAHIVRVRSRENRRNREPPQRFRRREDGPRPGQGGPPRAGGPGGPGGAPPVPGAGAPAPRV	116824	161275	189666	137621	151346	113556	140003	101742	116872	118043	85431.2	97147.6	49227.1	95465.1	81817.8	46345.6	48353.1	32683.4	20572.9	36988.7	62985.7	45598.7	51577.4	48415.8	52144.4
Bradi1g04140.1	5.12024e-06	2.58632e-05	0.000435186	1.82396e-06	4.62056e-06	1.29265e-05	1.82396e-06	0.660881	0.481109	0.660881	0.481109	0.521026	0.507478	MKVIEKIQEAAANGRTVFSFEYFPPRTEEGVENLFERMDRMVAHGPNFCDITWGAGGSTADVTLDIANRMQNMVCVETMMHLTCTNMPVEKIDSALDTIKSNGIQNVLALRGDPPHGQDKFVQVAGGFSCALDLVQHIKAKYGDYFGITVAGYPEAHPEVILGEEGATEEAYSNDLAYLKRKVDAGADLIVTQLFYDTDMFLKFVNDCRQIGITCPIVPGIMPINNYKGFIRMTGFCKTKIPAEITAALDPIKDNEEAVKAYGIHLGTEMCKKILASGINTLHLYTLNMEKTALAILMNLGLIEESKLSRTLPWRPPTNVFRVKEDVRPIFWANRPKSYISRTLGWDQYPHGRWGDSRNPSYGALTDYQFTRPRGSGKKLQEEWAVPLKSVQDINERFM…	320363	442462	444648	371326	394700	257138	241384	245759	299118	260849	196040	179896	163394	220246	189894	253524	219409	187366	162296	205649	197299	171951	213780	218176	200302
Bradi1g04220.1	0.0178089	0.0260566	0.920252	0.739835	0.293019	0.00666728	0.00666728	1.83031	1.13925	1.13925	1.21306	1.37915	1.83031	MGLTFTKLFSRLFAKKEMRILMVGLDAAGKTTILYKLKLGEIVTTIPTIGFNVETVEYKNISFTVWDVGGQDKIRPLWRHYFQNTQGLIFVVDSNDRDRVVEARDELHRMLNEDELRDAVLLVFANKQDLPNAMNAAEITDKLGLHSLRQRHWYIQSTCATTGEGLYEGLDWLSSNIASKFL	566689	715453	964004	1.20894e+06	863772	705225	1.00911e+06	1.0817e+06	1.14017e+06	984051	1.11499e+06	1.25572e+06	1.13596e+06	684574	1.04781e+06	847901	1.0802e+06	1.23535e+06	1.60163e+06	1.19127e+06	1.35184e+06	1.98595e+06	1.38608e+06	1.60002e+06	1.58097e+06
Bradi1g04337.1	0.000502173	0.00115051	0.99985	0.0705447	0.0296975	0.000411948	0.000411948	1.94606	1.02123	1.02123	1.46296	1.5443	1.94606	MDGQLRVIPWYEPARDKIAHSPTHAVHYRWVELILIKPRHHPRNHTHTDAKGREINQRRRTERRAQLVAPGRPSHGAQYAPPSASDDEGDAADDAPGVVRDQQDQEEEDELLLITAPSSSSALAVRDVEVRDIHPLTTPPTRAGSAYAASTAWDTASSSHRSVASSEGQFMTMSREFTAMVAAGAGAGAGAGANHNNPNPNPGGAAYDAHADPLASIGEDELEEEHNPLAIVPDSGRPIAAGSSSRSSGRGAARLDLEVVPAAAGPPVEARQVRKEEVETKVTAWQTAEIAQINNRFKREEVVINGWETEQLDKASAWLKKIERKLDEQRAKAVEKTQNDVAKARRKAEERRASAEAKRGLKLAKVLELANFMKAVGRVPTKRSFF	59306.3	58366.2	82214.2	75189.9	68769.2	79478.8	93766.9	54287.8	53383.2	70229.2	97815	119952	87281.9	97377	100606	89125.4	90478.1	128189	117008	106200	108522	125549	158151	143092	133829
Bradi1g04440.1	0.197407	0.220084	0.393732	0.201323	0.257588	0.99923	0.201323	1.12899	1.01168	1.09993	1.12899	1.11885	1.01168	MGNCCGAPSSSSQGGGKNRRKQKANPFTVAYNRGAATPARPGLVVLRDPTGRDLEARYVLGGELGRGEFGITYLCTEAATGARLACKSISKRKLRTPVDVEDVRREVEIMRHMPPHPNIVSLSAAYEDEDDVHLVMELCEGGELFDRIVARGHYTERAAAAVTRTIVEVVQMCHRNGVIHRDLKPENFLYANKKESSPLKAIDFGLSVFFRPGERFTEIVGSPYYMAPEVLKRNYGPEIDVWSAGVILYILLCGVPPFWAETEQGVAQAIIRSVVDFKRDPWPRVSEPAKDLVRRMLDPNPITRLTAAQVLEHPWLHDSKKNPDIPLGDTVRARLQQFSAMNKLKKKALRVIAEHLSLEEVADIKKMFDGMDVNKNGKLTFEEFKAGLRKLGNKMHDSD…	251075	225322	217035	210872	226076	286286	243556	233844	230983	248667	251688	266925	250180	252158	255238	287709	251409	248303	224360	252945	247987	195907	237914	233060	228717
Bradi1g04660.1	3.35265e-06	1.91641e-05	0.0183232	0.000619826	2.32749e-07	1.19849e-05	2.32749e-07	0.727297	0.3004	0.727297	0.586773	0.3004	0.36959	MADRGGERGGDRGGERGGFGRGFGRGGRGDRGGRRGGRRGPRQEEEKWVPVTKLGRLVKEGKFQKIEQIYLHSLPVKEHQIVETLCPGLKDEVMKITPVQKQTRAGQRTRFKAFVVVGDSNGHVGLGVKCAKEVATAIRGAIILAKLSIVPVRRGYWGNKIGQPHTVPCKVTGKCGSVTVRMVPAPRGSGIVAARVPKKVLQFAGIEDVFTSSRGSTKTLGNFVKATFDCLMKTYGFLTPDFWRETTFTKAPYQEYTDLLAKPTKALMLDAPVEKIEA	61462.7	94621.6	98817.7	89484.5	86096.6	47593	63781.4	70934.3	68162.3	62617.8	52325.1	52743	37848.5	59159.9	50519.1	23651.8	30811.8	22875.2	26115.1	25863.5	27424.2	40699.3	30863.4	28295	31820.5
Bradi1g04860.1	4.62434e-07	4.1041e-06	0.0255224	0.0214173	3.95305e-08	1.02133e-05	3.95305e-08	0.788502	0.316548	0.788502	0.782405	0.316548	0.49447	MRSSWADSVANAEESAPATAAASAAVANHQNSRPTRSSYVPPHLRGRSPGPPSENHAPGLAPAPAGIPPSGAVQPSGYAAVVGGGSRWAAPPAGGGTGVGVVRQGGGRGGGGGGGGGGWNSRPGLDRRDREPNPFGDVEPPAEVDFESQANTGINFDAYEDIPVETSGHDVPTPVNTFAEIDLGDALNENIRRCKYVRPTPVQRHAIPIVIGGRDLMACAQTGSGKTAAFCFPIISGIMKSRPPQRPRGSRTAYPLALILSPTRELSVQIHEEAKKFAYQTGVRAVVAYGGAPIHQQLRELERGVEILVATPGRLMDLLERARVSLQMVNYLALDEADRMLDMGFEPQIRKIVEQMDMPPRGVRQTMLFSATFPKEIQRLASDFLADYIFLAVGRVGSS…	26560	28131.8	25997.2	20732.1	25355.3	19541.3	18735.1	19695.4	21998.9	19992.7	21615.1	15773.7	18783.8	23179.8	19838.1	8837.35	7903.29	9696.37	5667.58	8026.15	12663.3	9482.72	13799.4	14204.3	12537.4
Bradi1g04917.1	5.87189e-05	0.000185943	0.558247	0.000216376	0.933868	0.995998	0.000216376	1.84706	0.91353	1.18062	1.84706	0.91353	0.960578	MASAAKSSRSRPSGHSGVFPVSAAAAAGGDGGVQLADKLKIFKTDKFDPDSYVQSKCRTMNEKEIRHLCSYLQDLKKASAEEMRRSVYANYAAFIRTSKEISDLEGELLSVRNLLNTQSALIHGLSEGVQIDSLTTGLEGATEENKSSLEDQEPSEIQKWHTDFPDLLDVLLAERRVDEALDALDEAEQIAADAKQKQTLATADILALQKVISENRQKLSDQLAEAACQSSTCGIELRAAASALKRLGDGPRAHSLLLSAHSQRLESNIQTTHPSSTAYGGAYTASLAQQVFSVIAHALNDSAEVFGDEPAYASELVTWAAKQVLSFALLVKRHALASCAAAGGLRAAAECVQIALGHSSLLEARGLSLSAVLMKQFRPSVEQAIDSNLRRIEESAAAL…	16659	8467.39	11645.5	11610.2	12095.5	15575.6	15883.1	14062.7	11599.3	14280.2	22802.9	19436.8	21786.5	25338.4	22341.2	11471.2	9008.31	14331.5	9387.42	11049.6	11436	10087.4	10518.7	14432.6	11618.7
Bradi1g04930.1	0.0126776	0.0193244	0.0636428	0.928998	0.614451	0.730052	0.0636428	1.27443	0.878334	1.27443	1.06399	0.878334	0.896791	MAASASASGRSSAMLGLAMAAVLLAFGLVGPAGADFAADRAECADRLMGLATCLTFVEATATARAPTPDCCSGFKTVLGASKKCLCVLVKDRDEPALGLKINVTRAMNLPSACSIPATFSDCPKILNMSPDSKEAEIFKQYAKEHEGKNGTTTTTPAAAAATGTTGGKSANAAAAAGAGTQRRSTAFVGVVSALLASVFVLA	1.26574e+06	1.79495e+06	1.91749e+06	1.73524e+06	1.67835e+06	2.1665e+06	1.83086e+06	2.35818e+06	2.20021e+06	2.13894e+06	1.58477e+06	1.65666e+06	1.93549e+06	1.96605e+06	1.78574e+06	1.20294e+06	1.20526e+06	1.51173e+06	1.97669e+06	1.47415e+06	1.61822e+06	1.35547e+06	1.53331e+06	1.51353e+06	1.50513e+06
Bradi1g04950.2	1.9283e-08	3.85871e-07	0.0215594	7.52756e-07	2.80045e-10	1.16303e-07	2.80045e-10	0.807933	0.287257	0.807933	0.510828	0.287257	0.370769	MSSEAAKVVVPESVLRKRKREELWAAEKKTKAVEEKKKSSENRKVIFARAKQYAEEYDAQDKELVQLKREARLKGGFYVSPEAKLLFVVRIRGINAMHPKTRKILQLLRLRQIFNGVFLKVNKATINMLRRVEPYVAYGYPNLKSVRELIYKRGYGKLNKQRIPLTNNKVIEEGLGKHNIICIEDLVHEILTVGPHFKEANNFLWPFKLKAPLGGLKKKRNHYVEGGDAGNRENYINQLVRRMN	243151	343515	333046	288039	301938	221657	249517	238139	266470	243946	155959	164508	134433	162053	154238	112249	96892.4	77456.9	60336.4	86733.8	111590	93934.6	126821	115451	111949
Bradi1g05030.1	0.000261554	0.000652193	0.43245	0.114464	9.16697e-05	0.00538593	9.16697e-05	0.929098	0.704014	0.929098	0.888088	0.704014	0.810487	MGQQSLIYAFVARGTVVLAEYTEFTGNFTTIASQCLAKLPSSNNKFTYNCDGHTFNYLVEDGFTYCVVAVESVGQQMPIAFLVRIKDDFSKRYGGGKAATAAASSLNREFGSKLKEHMQYCVDHPEEINKLAKVQAQVSEVKNVMMENIEKVLDRGEKIELLVDKTENLRSQAQDFRQQGTQVRRKMWLQNMKIKLIVLGIIVALILIIILSVCHGFKCK	121756	114134	123504	107109	116626	110549	101781	102089	119009	108357	92738.8	110071	105437	106049	103574	94725.9	80923.1	77315.7	75460.7	82106.3	100613	86625.4	103018	87839.2	94523.9
Bradi1g05070.1	2.87945e-11	6.47397e-09	0.779505	0.467021	3.70689e-11	1.22889e-11	1.22889e-11	6.53268	0.489189	0.667822	0.489189	6.53268	5.31266	MAAAQLLGEDGRGYELARRLEACGAWRAWLGDGAHASLAQHLASPSTWDAFLSPASSSTSSNSAAPPRQLLLLQLRVRALLFDKASAALIPRNGASPAGPHSVNASYLQLHGDDIYFSLEDEQEDTAQHQMQSGTAFSPSRESVMLSQRNMRQDELPGSWYKQYAEKFRTRHGKYRSDDKEIPKRTPEGMSNYLKACSVHKRKRIVFMDDRSPNMMLENGPSLQSKVAGEFSNLADDTFIPEIRFPSDCVPESAVPRESGISRSNKIEVNGVLDNLPAPVSRNTAMLERFGMMPEYYKTGNKYRGKIGSKVEGKTLSQEQALLITRKLVARYLANAGFESGTAVAVDVLSEIIIKHISKLGRNLKLLSDSYRKQFSSIELLRMFLQTVGYSNIGPLMEI…	19468.5	18083.9	21470.2	16817.3	18960	12588.2	12476.1	12209.9	13373.4	12661.9	8345.51	11241.7	8135.16	9377.7	9275.02	125607	103642	118692	147497	123860	93170.3	97288.5	118905	93548.6	100728
Bradi1g05100.1	0.000103669	0.000296921	0.14232	6.52669e-05	0.999979	0.947172	6.52669e-05	2.394	1.01654	1.50203	2.394	1.01654	1.12907	MELFAHAKAVRLKSRHDKFLYADEDELHVTQDRNGSSPNARWAVEHAAPGCVRLRSRYGRYLAASSEPFLLGMTGRKVLQAAAPAPGAGARPDASVEWEPVRDGFQARLKTRQGGNYLRANGGLPPWRNSVTHDVPHRTATQDWVLWDVEIVQVLTPGPAEHAASAPAAVLAPESPPAPKLRPPPTPHEAHHRPTKSYAAATPPPEYAPPPPPPKRAEHAAPPPPARPDPRLSKLESSNSFSAPLHKVEGRAIHYLIADDKGNVDDDVERHSFTFNGSNLEELTHKLQEETGLDDLIICTRSPINGKLTPLLLQLPPNNAAMHIVLVRESSKGVFSTPYCLHHS	6142.34	11790.9	10731.1	7771.58	9108.98	17559.2	12898.5	13061.1	11209.2	13682	18059.1	26225.6	17361	25581.7	21806.9	10792.8	11123.7	7958.51	7163.47	9259.61	11303.7	7555.15	12380	9899.93	10284.7
Bradi1g05150.2	0.153739	0.176205	0.999989	0.263674	0.875771	0.669721	0.263674	1.3005	0.877167	1.01024	1.3005	0.877167	1.1804	MGGFFSSLWTPPPNTDDGDSAVVAVHSKASWDEQLKIHGSATANKLMVIDFSATWCGPCRFIEPAFKEMASRFTDAVFVKIDVDELSEVAKTFCVEAMPTFVLLKGGQEVSRVVGAKKDELDRKIKTFISSSQS	37264.6	41247.8	59707.1	66008.9	51057.1	31788.6	59443.4	52743.2	62344.9	51580	58442.5	72598.3	62846.8	71712.2	66399.9	42533.2	37377.2	47339.3	51892.9	44785.6	41991.1	66623.8	79636.1	52820.2	60267.8
Bradi1g05180.1	3.77152e-05	0.000128731	0.886687	0.560023	0.000578435	7.89716e-05	7.89716e-05	2.83731	1.21287	1.21287	1.37252	2.51285	2.83731	MASNGAGKKTPPPASASSSSSTLRNSMTLQFARQVVTGRWFMVFACLLILSASGATYIFGIYSKELKSTLGYDQRTLNTLSFFKDLGANVGVLSGLINEVTPPWVVLSMGAAMNLAGYLMIYLAIDGKTRRPPVWLMCIYICVGANSQSFTNTGALVTCVKNFPESRGVVLGLLKGFVGLSGAIFTQLYIAIYGDDAKSLVLLVAWLPAAVSIVFVHTVRIMPYRVRGDRGENASGIGTGTDSGGSDPFFCFLYISMALAAYLLVMIVVQNQVDFSHAAYSVSAAALLLILFLPLAVVIKQEFRAKQELEAALLLPPTVTVDKPSSPSPPATAALQMAEPKTELSASPPQTSSSSSCSGSCLKHMFNPPAQGEDYTILQALVSVDMIVLFLATICGVGG…	7924.39	3167.32	2397.84	3649.45	4284.75	6817.27	3589.18	5033.77	5347.17	5196.85	5456.46	5200.73	5161.72	7704.75	5880.92	9225.15	11759.9	11769.4	10313.3	10766.9	15527.7	10392.8	12202.1	10506.2	12157.2
Bradi1g05340.1	0.1052	0.125146	0.911991	0.965397	0.0603496	0.252445	0.0603496	0.888878	0.40233	0.852184	0.888878	0.40233	0.58812	MADVDVEPEVAAGQPKKRTFRKFSYRGVDLDALLDMSKEDLVQLFPARIRRRFNRGLKRKPMALIKKLRKAKSDAPAGEKPEPVRTHLRNMVIMPEMIGSVIGIYNGKMFNQVEIKPEMIGHYLAEFSLSYKPVKHGRPGIGATHSSRFIPLK	35240.1	76655.4	71010.7	80602.8	65877.2	37294.3	64326.5	46672.8	76264.6	56139.6	47076.2	41051.8	44146	101953	58556.8	33627	3950.17	27422.7	41017.8	26504.4	34025.8	34100.1	67215.8	19633	38743.7
Bradi1g05510.1	0.143198	0.16553	0.0765219	0.167251	0.218632	0.112291	0.0765219	0.745204	0.664971	0.664971	0.723643	0.745204	0.693137	MATSARPLVSVKALEGDMATDSAGVPMPHVFRAPIRPDVVRFTHRLISCNSRQPYAVSRRAGHQTSAESWGTGRAVSRIPRVGGGGTHRAGQGAFGNMCRGGRMFAPTKIWRKWHRRVNVRLRRVAVASALAATAVPSLVLARGHRIESVPEFPLVVSDSAESIEKTAQSIKILKQLGAYADAEKAKDSVGIRPGKGKMRNRRYINRKGPLVVYGTEGSKIVKAFRNLPGVDVANVERLNLLDLAPGGHLGRFVIWTESAFKKLDEVYGSLETPSLKKKGFVLPRPKMANADLSRLINSDEVQSVVKPINKEVKRREARKNPLKNAAAVLKLNPYFGTARKMAVLAEAARIKARKEKLDSKRTKLSADESSKIKAAGKAWYKTMISDSDYTEFDVFSKW…	28935.2	43775.7	57806	48273	44697.5	21438	32613.6	26430.2	38408.4	29722.5	27509.7	34827.5	29708.6	37334.3	32345	39995	20787.8	35595	36857.2	33308.7	27935	20879.5	37426	37685.5	30981.5
Bradi1g05670.1	8.2077e-05	0.000243881	0.10634	0.393866	0.00782985	0.00092622	0.00092622	1.14952	0.532739	0.770408	1.14952	0.638219	0.532739	MSLIAGEEFQHILRLLNTNVDGKQKIMFALTSIKGVGRRFSNIVCKKADIDMNKRAGELTPEELDRLMHVVANPRQFKVPDWFLNRKKDYKDGRFSQVVSNALDMKLRDDLERLKKIRNHRGLRHYWGVRVRGQHTKTTGRRGKTVGVSKKR	288647	371474	420704	351970	358199	197817	259161	304252	342608	275960	411634	505874	368288	361234	411757	247726	242521	208090	216101	228610	155846	180256	224758	202447	190827
Bradi1g05980.1	0.0467687	0.0611939	0.998537	0.988163	0.045082	0.987783	0.045082	1.0701	0.460589	0.959573	1.0701	0.460589	0.929269	MSGRGKGGKGLGKGGAKRHRKVLRDNIQGITKPAIRRLARRGGVKRISGLIYEETRGVLKIFLENVIRDAVTYTEHARRKTVTAMDVVYALKRQGRTLYGFGG	11872.6	8864.71	20564.6	18402.8	14926.2	9274.92	19390.3	14081	14544.8	14322.8	15037.9	23642.4	13180.4	12029.6	15972.6	9999.23	6091.18	6405.94	5003.02	6874.84	11607.1	15975.8	15273.3	12625.5	13870.4
Bradi1g06050.1	0.0575681	0.0737506	0.0905203	0.0195236	0.375477	0.12076	0.0195236	1.38803	1.1872	1.29162	1.38803	1.1872	1.27212	MAKDSALRGPWLCCVVAALAASVSPAAEALGMNWGTQATHPLSPKIVVQMLKDNGIKKVKLFDADQGTLGALAGTDIEVMVAIPNVLLDLMTDSDNARDWVRHNVSRYHFDGGVNIKYVAVGNEPFLASYNGTFDKVTLPALKNIQNALNDAGLSDVKATVPLNADVYNSPKDKPVPSAGTFRPDITDLMTEMVDFLAKNGAPFTVNIYPYLSLYLSDDFPVNFAFFDGGADPVVDNGNSYTNVFDANFDTLVSALKAVGHGDLPIVIGEVGWPTDGDKHATYVYAQRFYTGLLKRLAANVGTPLRPNKYMEVYLFGLLDEDIKSVAPGAFERHWGVLRFDGQPKFPMDLTGQGQNTMLAPAKDVQYLPKTWCVYNANAKDTSKLAENVNFACTFADCT…	96061.3	95629.7	129254	138705	114912	174535	148586	138882	131688	148423	140736	161680	149941	185650	159502	154454	132440	143099	115704	136424	166564	119344	157975	140845	146182
Bradi1g06220.2	9.53779e-07	7.52425e-06	0.00036978	1.16914e-05	4.07195e-06	2.37463e-07	2.37463e-07	0.665404	0.407887	0.665404	0.511547	0.463324	0.407887	MAPKVAVAKKGDAKAQAAKVAKAVKSGSIKKKTKKIRTSVTFHRPRTLKKARDPKYPRISTPGRNKLDQYQILKYPLTTESAMKKIEDNNTLVFIVDLKADKKKIKAAVKKMYDIQAKKVNTLIRPDGKKKAYVKLTADYDALDVANKIGII	110685	106832	100944	79265.6	99431.5	52394.4	64950	76186.7	71117.5	66162.1	51653.3	55311	45038.1	51453.1	50863.9	55031.4	46981.4	37852.7	44410.5	46069	39403.7	32817.2	47661.7	42344.8	40556.8
Bradi1g06340.1	0.000114766	0.000321662	0.0225802	0.00099216	1.78727e-05	0.00160019	1.78727e-05	0.801383	0.571217	0.801383	0.70202	0.571217	0.719703	MFGRGPPKKSDNTRYYEILGVPKEASQDDLKKAYRKSAIKNHPDKGGDPEKFKEIAQAYEVLSDPEKREIYDQYGEDALKEGMGGGGGMHDPFDIFQSFFGGSPFGGGGSSRGRRQRRGEDVVHPLKVSLEELYNGTSKKLSLSRNVLCSKCNGKGSKSGASMKCAGCQGAGYKMQIRQLGPGMIQQMQQPCNDCRGTGETISDKDRCPQCKGEKVSQEKKVLEVVVEKGMQHGQKITFPGEADEAPDTLTGDIIFVLQQKEHPKFKRKSDDLFYEHTLTLTEALCGFQYVLTHLDGRQLLIKSNPGEVVKPDSFKAINDEGMPMYQRPFMKGKLYIHFTVDFPDSLNPDQCKALEAVLPPKPASQYTDMELDECEETMAYDIDIEEEMRRRQQQQQQE…	19659.4	18535.3	19649.9	15262	18276.7	16027.9	12551.7	15473.1	14533.8	14646.6	12496	13110.6	10728	14987.7	12830.6	12418.2	10381.3	8661.98	10298.3	10439.9	14702	12157.7	12492	13263.3	13153.8
Bradi1g06360.1	0.0173492	0.0254116	0.0682302	0.0630796	0.00648977	0.017047	0.00648977	1.32192	1.21953	1.21953	1.22297	1.32192	1.28107	MAAKTSRWAASVVAAVVLLAAAASSAEARGDGNGVYEPCADATVQRGDGFTFGVAFSSRDSFFSGDVQLSPCDSRLNLQSRAPLALFRPMVDEISLLTINASGGTAFDPASAGGYMVAFAGRKYAARSPPVFVSNSSYTVTGFTLVLEFQKGILQNFFWKTDGCSSCSGQSDFACVDQSCAIKTSSCKGNGAGQVDCSPGIQLAFSGTDKHEEVLNSWYEVSKLRQYSLFGLFSNLKNSLTNQFSQFF	75610.2	93583.5	88465.3	112991	92662.4	108145	113629	116975	113272	113005	100327	119488	116724	116754	113323	102325	134714	117873	135056	122492	118866	119225	127312	109425	118707
Bradi1g06366.1	6.56297e-05	0.000204022	0.0328907	0.000357774	5.82317e-05	5.75241e-05	5.75241e-05	0.724482	0.427152	0.724482	0.511779	0.428645	0.427152	MPFKRFVEIGRVALVNYGKDYGRLVVIVDVVDQNRALIDAPDMVRCQINFKRLSLTDIKIDIKRVPKKATLIKAMEEADVKNKWENSSWGKKLIVQKRRASLNDFDRFKVMLAKIKRGGAIRQELAKLKKEVAA	66143.2	87517.9	63401.5	44178.9	65310.4	45571.2	42861.3	53847.4	46984.9	47316.2	33179.8	34379.5	30150.3	35988.3	33424.5	27719.9	33738.9	24613.9	25907	27994.9	28494.2	22692.6	28785.3	31617.6	27897.5
Bradi1g06372.1	0.337121	0.360648	0.894275	0.755508	0.19095	0.324163	0.19095	1.29114	1.10126	1.10126	1.13777	1.29114	1.24179	MNNLFSSSWKRAGDGDLESGGVEMSAPPGAAAGASLDKFFEDVESIKDDLRDLDRIQRSLHDGNESGKSLHDASAVRALRARMDADAAAAIKKAKVVKLRLESLDRANAANRSVPGCGPGTSTDRTRTSVVAGLRKKLRDSMESFSALRARVSSEYRDTVARRYFTVTGAQPDEATLDTLAETGEGERFLQRAIAEQGQGRGEVMGVVAEIQERHGAVADLERSLLELHQVFNDMAVLVAAQGEQLDDIEGHVGRARSFVDRGREQLQVARKHQKSSRKWKFIAIGILLVIILVIVIPIVLKNTKNSSSSNNSNQPQQ	90535.7	57991	46347.7	46191.3	60266.4	91426	61787.9	59650.3	52613	66369.3	69498.6	65721.6	68786.9	70270	68569.3	78492.6	75842.8	72632.7	84281.2	77812.3	78989.1	68292	75109	76963.7	74838.5
Bradi1g06430.1	0.0482247	0.062916	0.280297	0.999628	0.776796	0.343514	0.280297	1.25408	0.765666	1.25408	1.02141	1.13185	0.765666	MGEVTNVMEYQAIAKQKLPKMAYDYYASGAEDEWTLKENREAFSRILFRPRILIDVANIDMTTSVLGFKISMPIMISPTAFQKMAHPEGEYATARAASAAGTVMTLSSWATSSVEEVASTGPGIRFFQLYVYKDRKVVEQLVRRAEKAGFKAIALTVDTPRLGRREADIKNRFVLPPNLTLKNFEGLDLGKMDQSNDSGLASYVAGQIDRTLSWKDVKWLQSITSMPILVKGVITAEDARLAVHSGAAGIIVSNHGARQLDYVPATISALEEVVTAAQGRIPVFLDGGVRRGTDVFKALALGASGVFIGRPVVFALAAEGEAGVRNVLRMMREEFEITMALGGCTKLSDITRRHIFTEADRLGRPLPRL	70416.4	74428.1	96714.2	121521	90769.9	117964	148748	89699.5	98918.8	113833	101209	104874	76495.7	88274.2	92713.2	109674	94614.2	88470.5	118193	102738	60612.3	64183.6	88356.8	64845.1	69499.4
Bradi1g06450.1	6.52079e-06	3.08651e-05	0.267463	0.00417909	1.46193e-05	6.37925e-06	6.37925e-06	2.39927	1.33741	1.33741	1.7558	2.30935	2.39927	MAGEKKGLTLLDFWVSPFGQRVRIALEEKALPYEYVEENLLAGKSELLLRSNPVHKKIPCLLHDGRPVNESLIIVQYLDEAFPDTRQLLPPHAAADPYARAQARFWADYVDKKVYDCGTRLWKLKGEPQVQAREEMKEILRTLEAELGEKEFFGGEHGFGFVDAAFAPFTAWFHSYEKFGEFSLEEVAPKLAAWAKRCGQRESVAKSLYSPEKVYEFIGVLKKKYGVE	197006	228599	197219	188105	202732	289448	323222	238431	233444	271136	351423	371678	303121	397605	355957	481084	529279	399358	463000	468180	376165	465271	510826	593372	486409
Bradi1g06630.1	0.00563082	0.00951876	0.926032	0.0501781	0.052497	0.0458191	0.0458191	1.15916	0.282104	1.15916	0.294433	0.300145	0.282104	MINFVLLISRQGKVRLTKWYSPYTQKERTKVIRELSGLILTRGPKLCNFVEWRGYKVVYRRYASLYFCMCIDADDNELEVLEIIHHFVEILDRYFGSVCELDLIFNFHKCPWPNFQAYYVLDEILIAGELQESSKKNVARLIAAQDSLVEAAKEEASSISNIIAQATK	277.243	23739.4	28693.7	21212.2	18480.6	20478.3	15639.4	26102.7	23467.5	21422	8473.77	5334.44	7766.61	190.429	5441.31	5346.95	16.6386	13236.8	3587.15	5546.87	6980.56	5062.49	7214	1596.82	5213.47
Bradi1g06700.1	0.000703929	0.00155672	0.183553	0.0205814	0.000528186	0.00107252	0.000528186	0.737321	0.314386	0.737321	0.58417	0.314386	0.392995	MSEHSENVTEKIMGSIMDTIADNLPKQKSGRFDPAAVSDKVNKLFGRQQSLHGVLGGGKSADVLLWRNKKISSSVLALATAIWIFFEWLDYHFLTIISFALVLGMVVQFVWSNFASRSSNVPRVELPKELFVNIAVAVGAQVNKFLGFLQDVSCERNLKHFVLAIVGLWAAAVAGSWFNFLTVIYIGFVCAHTLPVLYEKYEDQVDSFLYSLLDLLRDQYKKLDSGVLSRIPKGNMKFKKSE	30141	64931.1	51769.6	40869.5	46927.8	26287.8	41783.9	26922.7	43409	34600.9	19513	33170.6	30742.4	26229.2	27413.8	12816.1	12388	20497.5	13312.1	14753.4	14381.9	17643.2	17226.8	24517.7	18442.4
Bradi1g06800.1	0.000138489	0.000377417	0.0196861	0.11695	0.00786108	0.997198	0.00786108	1.21761	0.650289	0.692026	1.21761	0.650289	0.976332	MREILHIQGGQCGNQIGAKFWEVICDEHGIDATGRYAGDSDLQLERINVYYNEASGGRFVPRAVLMDLEPGTMDSVRSGPFGQIFRPDNFVFGQSGAGNNWAKGHYTEGAELIDSVLDVVRKEAENCDCLQGFQVCHSLGGGTGSGMGTLLISKIREEYPDRMMLTFSVFPSPKVSDTVVEPYNATLSVHQLVENADECMVLDNEALYDICFRTLKLATPSFGDLNHLISATMSGVTCCLRFPGQLNSDLRKLAVNLIPFPRLHFFMVGFAPLTSRGSQMYRALTVPELTQQMWDAKNMMCAADPRHGRYLTASACFRGKMSTKEVDEQMLNVQNKNSSYFVEWIPNNVKSSVCDMPPRGLKMAGTFVGNSTSIQEMFRRVSEQFTAMFRRKAFLHWYT…	158342	150161	207016	205313	180208	92043.5	140139	140197	126454	124709	178804	250504	230196	218190	219424	105901	104852	131826	126170	117187	158969	181386	204085	159332	175943
Bradi1g06860.1	2.47031e-08	4.44326e-07	0.000564645	8.75559e-07	1.35979e-09	1.33553e-11	1.33553e-11	0.746514	0.425292	0.746514	0.552587	0.451786	0.425292	MGKEKTHINIVVIGHVDSGKSTTTGHLIYKLGGIDKRVIERFEKEAAEMNKRSFKYAWVLDKLKAERERGITIDIALWKFETTKYYCTVIDAPGHRDFIKNMITGTSQADCAVLIIDSTTGGFEAGISKDGQTREHALLAFTLGVKQMICCCNKMDATTPKYSKARYDEIVKEVSSYLKKVGYNPDKVPFVPISGFEGDNMIERSTNLDWYKGPTLLEALDQINEPKRPSDKPLRLPLQDVYKIGGIGTVPVGRVETGVIKPGMIVTFGPTGLTTEVKSVEMHHEALQEALPGDNVGFNVKNVAVKDLKRGFVASNSKDDPAKEAANFTSQVIIMNHPGQIGNGYAPVLDCHTSHIAVKFAELVTKIDRRSGKELEKEPKFLKNGDAGIVKMIPTKPMV…	4.98483e+06	6.19381e+06	6.52903e+06	5.16285e+06	5.71763e+06	3.84376e+06	4.25324e+06	4.38861e+06	4.58757e+06	4.2683e+06	3.25909e+06	3.23112e+06	2.83596e+06	3.31178e+06	3.15949e+06	2.64346e+06	2.69206e+06	2.51637e+06	2.48068e+06	2.58314e+06	2.28059e+06	2.16454e+06	2.62627e+06	2.65525e+06	2.43166e+06
Bradi1g06890.1	0.00148719	0.00300332	0.639806	0.955434	0.000686394	0.155127	0.000686394	5.73944	1.50597	2.07239	1.50597	5.73944	3.024	MAALAASIATSTAFASKPRLSSPTPRARLSVSCSATGDNNNNNPSLATAAKTFSAALALSSVLLSSAATFSPPPAAADIAGLTPCKDSKAFAKREKQSVKKLTSSLKKYAPDSAPALAIQATIEKTQRRFENYGKFGLLCGSDGLPHLIVSGDQRHWGEFVTPGVLFLYIAGWIGWVGRSYLIAVSGEKKPAMREIIIDVELAARIIPRGFIWPVAAYRELINGDLVVDDADIGY	2248.96	892.835	274.994	2130.75	1386.88	1301.02	4862.96	3586.88	1745.81	2874.17	2654.51	2493.58	972.194	2234.13	2088.6	9110.11	10595.9	7271.01	4862.74	7959.94	3581.62	6826.44	643.996	5723.68	4193.93
Bradi1g07160.1	0.0398623	0.0531365	0.794241	0.99265	0.0299917	0.999662	0.0299917	1.03413	0.287401	0.79151	0.924349	0.287401	1.03413	MRECISIHIGQAGIQVGNACWELYCLEHGIQPDGQTSGDKTIGGGDDAFNTFFSETGAGKYVPRAVFVDLEPTVIDEVRTSAYRQLFHPEQLISGKEDAANNFARGHYTIGKEIVDLCLDRIRKLADNCTGLQGFLVFNAVGGGTGSGLGSLLLERLSVDYGKKSKLGFTVYPSPQVSTSVVEPYNSVLSTHSLLEHTDVSILLDNEAIYDICRRSLDIERPTYTNLNRLVSQVISSLTTSLRFDGALNVDVTEFQTNLVPYPRIHFMLSSYAPVISAEKAYHEQLSVSEITNSAFEPSSMMAKCDPRHGKYMACCLMYRGDVVPKDVNAAVATIKTKRTIQFVDWCPTGFKCGINYQPPTVVPGGDLAKVQRAVCMISNSTSVVEVFSRIDHKFDLMY…	95266.9	117222	167169	293426	168271	43533.3	232704	141728	114787	133188	141971	175804	170163	134227	155541	30795.8	40616	59034.8	62998.3	48361.3	152781	229059	164506	149712	174015
Bradi1g07170.1	1.78303e-05	6.81389e-05	0.000656651	0.0719924	0.000469304	0.362646	0.000469304	1.61379	0.808315	1.59645	1.30922	1.61379	0.808315	MHPDATSPSHRIARVAAHLNPLTPPRPQMEEAGLRPVACRAKGAAPGFKVAVLGAAGGIGQSLSLLMKMNPLVSVLHLYDVVNTPGVTADVSHMDTTAVVRGFLGQQQLEAALTGMDLVIIPAGLPRKPGMTRDDLFNKNAGIVRSLCEGIAKCCPNAIVNLISNPVNSTVPVAAEVFKRAGTYCPKRLLGVTTLDVARANTFVAEVLGVDPRDVSVPVVGGHAGVTILPLLSQVSPPCSFTADEISYLTNRIQNGGTEVVEAKAGAGSATLSMAFAAAKFADACLRGMRGDAGIVECSYVASEVRELPFFATKVRLGRGGAEEILPLGPLNDFERAGLEMAKKELAESIQKGVAFMNK	69309	74758.5	85067	103761	83223.8	112284	138395	152855	127915	132862	122506	120221	109109	83998.6	108959	137365	134171	132902	132787	134306	68613.5	86419.3	57171.9	56879.5	67271.1
Bradi1g07210.1	0.0249886	0.034788	0.0442237	0.415489	0.57012	0.010483	0.010483	0.731575	0.226827	0.386646	0.676095	0.731575	0.226827	MGHSNVWNSHPKNYGPGSRVCRVCGNSHGLIRKYGLMCCRQCFRSNAKDIGFIKYR	7156.04	3309.47	7474.93	6027.11	5991.88	1909.12	1655.19	3246.9	2455.73	2316.74	4994.29	3328.44	1734.32	6147.29	4051.08	399.596	7560.59	3787.45	5786.43	4383.52	1798.26	1399.6	1272.54	966.085	1359.12
Bradi1g07237.1	0.0770446	0.0953516	0.243827	0.936842	0.496344	0.967044	0.243827	1.31043	0.574383	0.574383	0.864172	1.31043	0.888189	MENPRFFLLAALLLFLGSGVANVVHGADGEQFVYSGFGGANASLSLDGTAVIEPSGILELTNGTAQLSGHAIHRTPLRLRRSPGAGVRSFSASFVFGIIPPYSDLSGHGIVFFLANSNNFTGALPSQYMGLLNSANEGNATNHVFGVELDTIQSKEFNDPNDNHVGIDVNSLKSIAVHPAGYYDDDNTGAFHELLLISSKVMQVWVDYESESTQINVFLAPLNVKSGTPKPSRPLVSRHYVLGWSFAMDGPAPPIDIGKLPRLPVEISKARSRVLEIVLPIGTAAFVLAVVTVVVLLVRRRSKYAEVREDWESEFGPHRFTYKDLFRATEGFKSKTLLGFGGFGRVHKGVLPKSKMEVAVKKVSHESRQGIKEFVAEVVTIGRLRHRNLVQLLGYCRRK…	245063	136130	181142	88066.5	162600	122111	72431.2	110559	68478.6	93394.8	103037	62138.1	197716	199167	140515	235620	225795	133015	257876	213077	112123	145668	193901	125987	144420
Bradi1g08030.1	0.000373832	0.000890989	0.0704603	0.184321	0.045453	0.476183	0.045453	1.63339	0.30922	1.63339	1.49873	0.30922	0.659292	MVRRRAAWAALLVALAACAALPATTTANKISINWAPNTNYTVWEQTHGPFYKGDWLVFYYTTGQADVVEVNESGYNRCDASNAIYNYSKGRSFAFELNQTKTYYFICSFGYCPGGMRLAIKSQKLPPPSPPPSAHDRSAALARSHAGLVLYAAAAVLAALLRML	6927.31	15665.3	18603	28336	17382.9	37109.4	30948.7	19355.3	26158.7	28393	23978.5	20156	34323.7	25751	26052.3	7432.02	2539.79	5957.3	5571.45	5375.14	14263.2	9584.01	7368.38	14626.1	11460.4
Bradi1g08120.1	0.00467445	0.00812913	0.115392	0.00529067	0.998732	0.128655	0.00529067	1.01858	0.642059	0.789546	0.642059	1.01858	0.795303	MVKICCIGAGYVGGPTMAVIAIKCPAIEVVVVDISKPRIDAWNSDVLPIYEPGLDDVVKACRGKNLFFSTDVEKHVAEADIIFVSVNTPTKTRGLGAGKAADLTYWESAARMIADVSKSDKIVVEKSTVPVKTAEAIEKILTHNSKGINYQILSNPEFLAEGTAIDDLFKPDRVLIGGRETPEGRKAVQALKEVYAHWVPEENIITTNLWSAELSKLAANAFLAQRISSVNAMSALCEATGANVSEVSYAIGKDSRIGPKFLNASVGFGGSCFQKDILNLVYICECNGLPEVANYWKQVIKINDYQKSRFVNRVVSSMFNTVSGKKIAVLGFAFKKDTGDTRETPAIDVCKGLLGDKAQVSIYDPQVTEDQIQRDLAMNKFDWDHPMHLQPTSPTAVKQ…	177835	166741	179001	165074	172163	128746	113431	159259	142286	135930	99707.5	114198	107143	121106	110539	212429	211842	153747	123427	175362	146671	127918	135828	137269	136921
Bradi1g08260.1	5.45335e-06	2.70462e-05	0.0462089	0.000157845	1.55503e-06	4.00153e-06	1.55503e-06	0.759078	0.346147	0.759078	0.515384	0.346147	0.35685	MVSGSGVCARRVVVDARHHMLGRLASIVAKELLNGQRVVVVRCEEICMSGGLVRQKMKYLRFLRKRMNTKPSHGPIHFRAPAKILWRTIRGMIPHKTKRGEAALARLKAYEGVPPPYDRTKRMVIPDALKVLRLQAGHKYCLLGQLSKEVGWNYADTIRELEEKRKEKAKVAYDRRKQLAKLRVKAEKTAEEKLGTQLEILAPIKY	75086.8	101280	126808	117201	105094	64701.8	100200	75715.6	78481	79774.6	56565.8	62557	43876.7	53655.5	54163.8	41773.8	31132.7	33272.3	39333.2	36378	35982.3	40803.7	32160.6	41064.6	37502.8
Bradi1g08420.1	0.113936	0.134118	0.199197	0.427668	0.475641	0.0350958	0.0350958	0.726053	0.41746	0.608739	0.709877	0.726053	0.41746	MSSLKSPVAAEEAMRGKQQGEGERYPVEEVALVVPETDDPSTPVMTFRAWTLGLSSCVVLIFLNTFFTYRTQPLTISGILAQILVLPVGRFMASVLPDREVRLLGGRLGSFNLNPGPFNVKEHVIITIFANCGVSYGGGDAYSIGAITVMKAYYKQSLSFLCALLIVLSTQILGYGWAGMLRRYLVDPAEMWWPSNLAQVSLFRALHETKEGGKPSKGPTRMRFFLIFFFASFAYYALPGYLLPILTFFSWACWVWPRSITAQQIGSGYHGLGVGAFTLDWAGISAYHGSPLVAPWSSIANTAVGFVMFIYLIVPLCYWRFNTFDARKFPIFSNQLFTGSGQKYDTTKVLTRDFDLNVAAYESYGKLYLSPLFAISIGSGFLRFSATIVHVLLFHGADM…	99519	107621	196157	286576	172468	49158.6	97538.6	137540	135715	104988	106645	168402	98091.5	116587	122431	126841	79948.5	130707	163388	125221	82982	79815.9	78030.2	47166	71998.5
Bradi1g08470.1	0.263314	0.287334	0.929904	0.358849	0.963726	0.55935	0.358849	2.51256	0.525063	1.57963	2.51256	0.525063	2.18688	MGRSRGVPNPGDDDTNHRSKRRRVASSGDATDSLSAACGGAGDGKKALYHCNYCNKDLSGKIRFKCSKCPDFDLCVECFSVGAEVQPHRSNHPYRVMDNLSFPLICPDWNADEEILLLEGIEMYGLGNWAEVAEHVGTKGKAQCIEHYTTAYMNSPCYPLPDMSHVNGKNRKELLAMAKVQGESKKGISVLPGDSTPKDESPFSPSRVKVEDAPGEGPAGRSPSHIAGGANKKASTAGHFKDSANLAKMEDGHMDRSIGVKKPRYSADEGPSLTELSGYNAKRHEFDPEYDNDAEQALAEMEFKETDSETDRELKLRVLRIYLSRLDERKRRKEFILERNLLYPNPLEKDLTNEDKEVYHRYKVFMRFLSKEEHEALVRSVIEERKIRRRIQELQECRS…	4030.88	26310	5655.59	1494.59	9372.76	24076.6	2239.66	27350.4	5555.47	14805.5	24831	8076.15	39041	22250.5	23549.7	4546.04	2804.22	4184.81	8150.08	4921.29	20227	8328.84	6448.49	46984	20497.1
Bradi1g08480.1	4.08616e-06	2.20489e-05	0.893468	2.01646e-05	0.000179144	0.000133535	2.01646e-05	0.948109	0.448264	0.948109	0.448264	0.578923	0.571028	MASAGVVAAAVVVAAFAAFCATDPLRLGSMVDFPGFEAHVVELPDAAEMPPHADAGERLRGAEIRFRGEVQGPESVAFDPQGRGPYTGVADGRVLFWDGARWVYFAHASPNWTAELCGPKASPLDFLRDEHICGRALGIRFDKRTGNLYIADAYFGLFKVGPEGGLATPLATEAEGVRFNFTNDLDLDAEGNVYFTDSSIYYQRRNFMQLVFSGDPSGRLLKYNPQTKETTVLHRNLQFPNGVSLSKDGSFFVFCEGSRGRLSRYWLKGEKAGTVDLFAILPGFPDNVRTNEKGEFWVAIHCRRSAYARLTSRRVQLRKFLLSLPIPAKYHYLMQIGGNLHALIIKYSPDGEVLDILEDTKGQVVRAVSEVEEKDGKLWIGSVLMPFIAVFDYAKES	139678	147163	142996	134174	141003	114318	109575	157452	153399	133686	71612.2	65194	53830.1	62190	63206.6	86520	67579.1	89579.8	82840	81629.7	106361	72181.9	69252.8	74270.4	80516.6
Bradi1g08510.1	3.5505e-06	1.9874e-05	0.559339	9.67681e-07	0.0735359	0.44139	9.67681e-07	41.7843	6.9383	6.9383	41.7843	13.0995	7.85127	MALMMEPGSEPLTEGEKADLVAIAVIKEEAAREYKEQGNQFVKMGRKHYADAVDCYTKAIAQISPPSAANPDASVLFANRAHVNLLLGNHRRALDDAEEAVRLSPSNIKAHYRAAKAALALDLLPEAASFCRRGLEQDPANEDLKKFLAQVEAQRCERDRRRAKVAKAVSAAKDLAAAIEKRKLRLAKAAYQELTGVKKPKLDEQGMLHWPVLLLYPEVMSSDFIEDFPETDMFSQHLDLMFSANSPPLPWDERHAYTREAIELYCEAGTGTPLSKSEILKHLLEGTVDARSLPENLDAEDGEHDTGKGSTVTPSSKWVKVKEGQTLQQALQHKDYIIPAIPVFYVVSRKSTFYSEFKAGNWSLP	6.87586	445.027	69.5755	13.0714	133.637	1339.53	2023.27	27.539	318.53	927.216	5902.58	5140.02	6794.59	4498.58	5583.94	1076.23	831.937	1908.72	3185.43	1750.58	703.611	45.8238	2527.13	920.325	1049.22
Bradi1g08860.1	7.97745e-05	0.000239546	0.97943	0.919706	7.38077e-05	0.126617	7.38077e-05	1.03939	0.446175	1.03939	0.941001	0.446175	0.792106	MAPKAEKKPAAKKPAEEEPAVEKAEKAPAGKKPKAEKRLPAGKTAAKEGGVDKKAKKKSKKSVETYKIYIFKVLKQVHPDIGISSKAMSIMNSFINDIFEKLAGESAKLARYNKKPTITSREIQTSVRLVLPGELAKHAVSEGTKAVTKFTSS	18566.5	14575.9	19090.7	15822	17013.8	14868.2	20369.9	18176.5	17321.3	17684	18977.1	16548.3	14814.3	13700.3	16010	8694.11	6882.62	7834.45	6953.36	7591.13	17256.1	14349.8	12263	10037.9	13476.7
Bradi1g08930.1	0.663247	0.676281	0.990855	0.999421	0.647803	0.952608	0.647803	1.06304	0.793585	1.06304	0.969237	0.793585	0.899749	MLAVFDQTVAKCPEGLRSPPAAGGGGSGGGGGAGALMKGFAAANDGAVTVSLGSAGALAYSSANKNPLVPRMFGSVNDIFCLFQGHVENIGNLKQHYGLSKTANEVTILIEAYRTLRDRGPLPASQVVRDLSGRFAFILYDTLSKSTFVAADADGSIPFFWGVDSEDHLVFSDDTELLKAGCGNSFAPFPKGCFYTTSGGLQSFEHPLNELKAVPRVDSQGQMCGSTFKVDSEAKKDSGIPRVGSAADWSNHF	11514.5	10558.2	12634.1	15902.4	12652.3	12154.7	14733.6	14126.8	12784.5	13449.9	9381.35	11905.3	14276.5	13489.2	12263.1	16020.1	9942.86	5657.8	8541.9	10040.7	5225.31	10934.8	11827.5	17548	11383.9
Bradi1g09060.1	0.0106757	0.0165535	0.959627	0.340353	0.077887	0.370385	0.077887	1.26772	0.571271	0.912053	0.722183	0.571271	1.26772	MAGKGGKGLLAAKTTAAKTAEKDKGKKAPVSRSSRAGLQFPVGRIHRQLKQRTQANGRVGATAAVYSAAILEYLTAEVLELAGNASKDLKVKRITPRHLQLAIRGDEELDTLIKGTIAGGGVIPHIHKSLINKSSKE	9607.74	6583.08	12145.7	7078.2	8853.69	6324.09	9013.75	9715.09	7247.2	8075.03	8497.5	7787.61	4009.11	5281.74	6393.99	6370.71	5845.94	4052.68	3962.11	5057.86	10973.5	9101.36	15356.6	9464.69	11224
Bradi1g09300.2	0.00483574	0.00832068	0.533887	0.943459	0.0020509	0.804735	0.0020509	1.47307	1.06143	1.13871	1.06143	1.47307	1.09325	MAMATALRKLSSNALRGQPLSRLTPLYSMASLPATEERSGVTWPKQLNAPLEEVDPEIADIIELEKARQWKGLELIPSENFTSLSVMQAVGSVMTNKYSEGYPGARYYGGNEYIDMAESLCQKRALEAFNLDPEKWGVNVQPLSGSPANFHVYTALLKPHDRIMALDLPHGGHLSHGYQTDTKKISAVSIFFETMPYRLDESTGLIDYDQMEKSAVLFRPKLIVAGASAYARLYDYDRMRKVCDKQKAILLADMAHISGLVAAGVIPSPFDYADVVTTTTHKSLRGPRGAMIFFRKGVKGTNKQGKEIMYDFEDKINAAVFPGLQGGPHNHTITGLAVALKQATTQEYRAYQEQVMSNCARFAQSLTSKGYDIVSGGTDNHLVLVNLKNKGIDGSRVEK…	42847.7	51336	46028.4	56876.3	49272.1	51025.7	56695.6	60538.6	56167.5	56106.9	58329.6	55702.7	50382.7	44779.9	52298.7	56866.3	66384.3	80777.4	86297.4	72581.3	54138	56672.6	56693.4	47962.8	53866.7
Bradi1g09460.1	3.71867e-05	0.000128731	0.879956	0.0474299	0.00231861	0.0745083	0.00231861	1.55295	0.642544	0.906434	0.642544	1.55295	1.32669	MFGRDPWGGTLEISNADSATDDDRSRDLDRGALMRHQLDETQQSWLLAGPGDQAGKKKKKYVDIGCMVIDRKIFLWTVGTILGVGLFIGFVMMIVKLVPHKKPPPPPPDQYTQALHKALMFFNAQRSGPLPKHNGVSWRGNSGMKDGLSDSTARKSLVGGFYDAGDAIKFNFPMAWSMTMLSWTVIEYKAKYEAIGELDHVKEVIKWGTDYILKTFNSSADTIDRIVAQVGVGDTSKGPMPNDHYCWMRPEDIDYKRPVIECHSCSDLAAEMAAALASASIVFKDNKKYSDKLVHGAKALYKFGRLQRGRYSPNGSDQSLFYNSTSYWDEFVWGGAWMYFATGNTSYLTIATAPGMAKHAGAFWLGSPNYGVFTWDDKLPGSQVLLSRLRLFLSPGYPY…	79462.3	55605.9	88109.3	104849	82006.6	61082.5	89852.4	68713.6	77685.5	74333.5	48611.7	45610.7	52050.6	64498.3	52692.8	135190	103058	134459	136700	127352	111022	106630	127122	90414.8	108797
Bradi1g09507.1	0.107598	0.127772	0.419779	0.146753	0.381546	0.0354712	0.0354712	0.537158	0.081604	0.537158	0.324675	0.515272	0.081604	MDRYQRVERPRPESAIAENEIRITAQGLIRNYVSYATSLLQDRRVKEIVLKAMGQAISKSVAVTEIIKKRVPGLYQDTNISSVSITDVWEPIEEGLVPLEMTRHVSMISITLSPVDLDVNSPGYQTPAYVEQPRQQQRLQQAPLALRQPRQPPTDYEDSYIRGRGRGRGRGRGRGWGRGGYGGYGNNQGGYNQGGYNQGGYNQDGYNQDGGYYDNQGGYGGYDNQGGYGGGYGYNQGRHGNYQENGGYNRGRGGIRGRGNWSYRGGFERGRGGGAPGGRGYEGGRGYDQGPGGRGYDGGRGYDQGPGGRGYDGGRGYDQGPAGRGYGGGRGYDQAPAGRGYEGGRGYGGRGRGRVGGRGRY	1894.76	3231.31	3501.6	2219.86	2711.88	783.543	1677.73	1581.26	1784.3	1456.71	0	2368.09	275.793	878.04	880.482	4811.16	0	325.781	452.485	1397.36	4.30537	0	0	880.897	221.301
Bradi1g09910.1	9.23977e-09	2.04335e-07	0.999135	0.997568	0.191641	9.24856e-08	9.24856e-08	41.3707	0.192786	0.38118	0.192786	7.73019	41.3707	MATAITFSGAHLPASAPRAPRPRRVLVSGSRARFPRLCRRSMDVSAAAAAGAASTPSAPDAGDSPVWDALDGVSVFSAGTGDAVPLRDLWDPASGVAVVALLRHFGCFCCWELASDLKKSMAKFDSAGAKLIAIGVGTSDKARILADGLPFPLDNLYADPERKAYNVLGLYHGLGRTLFSPASAKIYSRLDSIKEATKNYTLQGTPADLTGVMQQGGMFVFRGKELLYAWRDEGTGDHAPLDDVLGVCCKAPVY	1373.89	2319.13	2325.7	2699.17	2179.47	0	1395.46	1284.18	643.441	830.77	0	827.474	410.321	442.893	420.172	16684.6	11176.7	15371.5	24158.1	16847.7	63421.5	79098.6	108483	109662	90166.2
Bradi1g10150.1	0.00230213	0.00438022	0.263603	0.370402	0.000400759	0.169077	0.000400759	0.778844	0.274041	0.746404	0.778844	0.274041	0.707705	MRECISIHIGQAGIQVGNACWELYCLEHGIQADGQMPGDKTVGGGDDAFNTFFSETGAGKHVPRAVFVDLEPTVIDEVRTGTYRQLFHPEQLISGKEDAANNFARGHYTIGKEIVDLCLDRIRKLADNCTGLQGFLVFNAVGGGTGSGLGSLLLERLSVDYGKKSKLGFTVYPSPQVSTSVVEPYNSVLSTHSLLEHTDVAVLLDNEAIYDICRRSLDIERPTYTNLNRLVSQVISSLTASLRFDGALNVDVNEFQTNLVPYPRIHFMLSSYAPVISAEKAYHEQLSVAEITNSAFEPSSMMAKCDPRHGKYMACCLMYRGDVVPKDVNAAVATIKTKRTIQFVDWCPTGFKCGINYQPPSVVPGGDLAKVQRAVCMISNSTSVVEVFSRIDHKFDLMY…	545715	704564	911302	942625	776052	331952	941618	538215	505207	579248	508095	714131	665941	529525	604423	173488	184359	240740	252091	212670	508866	652491	594682	440822	549215
Bradi1g10347.1	0.0551316	0.0709133	0.801208	0.206752	0.880287	0.681099	0.206752	1.37511	0.795835	1.16764	1.37511	0.860475	0.795835	MAGRRQTPLLLLLLLGFWQLIHFPFAAPQSFIGINYGDVADNLPPPSSTARLLKSTTIGKVRLYRTDPAVVSAFAGTGISLLLGAANGDIPSFASSPSAAAAWVAAHLPSTSSPAITGISVGNEVLFSDDASLASQLVPALQNIHDALPPNSSIKVSTVNAMDVLASSDPPSSGAFKPGLATALDPLLAFLSKTGSPFLVNPYPYFAYQSDPRPDTLAFCLFQPNAGRPDAGSGLTYTSMFDAQVDAVRAALDAKGYKDVEVVVAETGWPHAGGADEAGASVENARAFVGNLVSHLRSMVGTPRMPGKSVETYLFAVYDENLKPGKPSEQSFGLFQTTALAEMYPTGLMRNGTAGLAPAPAPALQPASSATVPGKQPQAQPGSAAPTGLCAPGSVNSTS…	41075.2	55119.1	79054.7	107971	70805	90814	94269.1	76250.9	69363.6	82674.4	93806.8	134102	90632.5	70916.5	97364.5	70008.5	58251.8	55828.8	59614.5	60925.9	57068.7	44229.4	72437.1	51661.1	56349.1
Bradi1g10480.1	4.30523e-09	1.26255e-07	1.48162e-08	2.00741e-11	2.88691e-10	3.44313e-12	3.44313e-12	0.552102	0.356966	0.552102	0.356966	0.42528	0.379811	MVLSHAVSAGSSDDSVHSTFASRYVRAALPRFRMPENSIPKEAAYQIINDELMLDGNPRLNLASFVTTWMEPECNKLMMDSINKNYVDMDEYPVTTELQNRCVNMIAHLFNAPLGETETAVGVGTVGSSEAIMLAGLAFKRRWQNKMKAAGKPCDKPNIVTGANVQVCWEKFARYFEVELKEVKLREGYYVMDPEKAVELVDENTICVAAILGSTLNGEFEDVKMLNDLLVKKNEETGWDTPIHVDAASGGFIAPFLYPELEWDFRLPLVKSINVSGHKYGLVYAGIGWCIWRSKEDLPEELIFHINYLGADQPTFTLNFSKGSSQVIAQYYQLIRLGFEGYKNIMDNCRENAKVLKEGLEQTGRFNIVSKDEGVPLVAFSLKDSSRHDEFEISEFLRR…	1.51978e+06	1.87603e+06	1.67851e+06	1.45489e+06	1.6323e+06	820256	811436	871138	1.10196e+06	901197	573854	506882	554563	695404	582676	661451	687321	729555	698412	694185	582948	610155	624420	662340	619966
Bradi1g10530.1	1.37159e-06	9.63684e-06	0.996469	0.269425	8.6789e-08	0.000769779	8.6789e-08	15.8617	1.4551	1.4551	4.07521	15.8617	9.276	MAENIDLVLDFLRKNRFAKAEAALIGELSGLGDVNRSATQRRATEPKEDDEQEDSEVGSTAGPRGAASVRSADSSREFIVKEIDVGGLPNGSDEKKGLGIGLPQDNNTGDLYPWNFSIANSTVEQLAELLVSEEVPRHRRGALVAEKRDRGVGTEQPGPVLEQKVSFGRGKGKVELARRSEISEPAHSSDKNLVPEKEEPLNGYAVKTVLPFPTEIPSSSYHSTHHDVNERKETKKSIGADGAGKAAKRQPDEGNRQYYSEKSQNNVDQISDRCFDLQLMGNNQREEFPKLPPVRLKSEDKLVNMNWEEKIDHHESGTNDPSADHVFMIGSYLNVPIGQDITSSGGRRTIGGNSWLSVSQGIAEDTSDMIFRTMGDDFEYPNNEYWDSDEYDDDDDVGY…	7.41596	208.388	599.871	637.803	363.369	338.494	545.134	342.128	889.196	528.738	2006.6	1407.82	1804.16	704.65	1480.81	5449.29	4383.91	5169.47	8052.03	5763.67	2200.54	3101.86	4550.49	3629.57	3370.61
Bradi1g10630.1	7.07693e-05	0.000215991	0.00147842	0.0980259	4.62377e-05	0.000143989	4.62377e-05	0.726294	0.289959	0.47615	0.726294	0.289959	0.309528	MADAEDIQPLVCDNGTGMVKAGFAGDDAPRAVFPSIVGRPRHTGVMVGMGQKDAYVGDEAQSKRGILTLKYPIEHGIVSNWDDMEKIWHHTFYNELRVAPEEHPVLLTEAPLNPKANREKMTQIMFETFNTPAMYVAIQAVLSLYASGRTTGIVLDSGDGVSHTVPIYEGYALPHAILRLDLAGRDLTDYLMKILTERGYSFTTTAEREIVRDMKEKLSYIALDYDQEMETSKTSSSVEKSYELPDGQVITIGAERFRCPEVLFQPSFIGMEAAGIHETTYNSIMKCDVDIRKDLYGNIVLSGGTTMFTGIADRMSKEITALAPSSMKIKVVAPPERKYSVWIGGSILASLSTFQQMWIAKAEYDESGPSIVHRKCF	11899.7	14701.3	20315.9	15052.7	15492.4	7689.36	7255.32	6828.27	7733.89	7376.71	9240	16429.1	9262.59	10076.5	11252	5871.98	3483.31	4774.84	3838.5	4492.16	3188.04	3092.66	8487.72	4412.87	4795.32
Bradi1g10697.1	6.17002e-11	9.24817e-09	1	0.99997	0.0644828	0	0	544.814	1.0877	1.0877	3.47844	83.4806	544.814	MVHSAYDAVELVAGVPGRIEAVASHAGKLLVAASDCSLRIYSPPPPADGEIRKDGLYTLERQEPRLWRRAPSAMEASASRDLLLSLSEWVALHRLPGLETVAVVSKTKGANVFAWDDRRGLLAAGRQRRLTVFRLDSGREFVEVKEFGVPDMVKSMAWCGDNICLGIRRDYMIINSMTGALTEVFSSGRIAPPLVVPLPTGELLLGKDNIGVYVDQNGKLLHDGRIIWSDTPASVVIHRPYAVARLPRHIEIRSLRAPNALVQMVVLRDVQKLVQTDNCILAALSNSVYGLLPVPIGAQIVQLTASGEFEEALALCKLLPPEDSNLRAAKESSIHMRYGHFLFDNGSYDEAMEQFSNSHVDITYVLSLFPSLVLPQTHIIGEHDKLQDLPELARESSDV…	85.6332	19.9504	0.349797	2.1701	27.0259	7.45235	5.61718	7.04031	97.4743	29.396	183.254	11.4939	5.33651	175.947	94.0078	1936.42	1634.58	2725.05	2728.5	2256.14	11782.8	13167.1	16916	17030.5	14724.1
Bradi1g10880.1	0.014732	0.0220817	0.22291	0.128747	0.0158108	0.00589273	0.00589273	0.730583	0.453437	0.730583	0.684321	0.526986	0.453437	MSDSHETDKNIEMWKIKKLIKGLESARGNGTSMISLIMPPRDQVSRVTKMLGDEYGTASNIKSRVNRQSVLAAITSAQQRLKLYNRVPPNGLVLYTGTIVTDDGKEKKVTIDFEPFKPINASLYLCDNKFHTEALNELLESDDKFGFIIMDGNGTLFGTLSGNTREVLHKFSVDLPKKHGRGGQSALRFARLRMEKRHNYVRKTAELATQFFINPATSQPNVAGLILAGSADFKTELSQSDMFDQRLQTKILNVVDVSYGGENGFNQAIELSAEILANVKFIQEKKLIGKYFEEISQDTGKYVFGVDDTLKALEMGAVETLMVWENLDVNRYVLKHSVTAEIIIKHLNKDQEADQSNFRDETTNAELEVQEKTSLLEWFANEYKKFGCTLEFVTNKSQE…	3978.67	3944.8	7167.7	4590.17	4920.33	2500.44	3561.17	3193.54	5123.69	3594.71	3628.74	3295.24	2744.17	3800.22	3367.09	2199.91	3371.46	2989.69	1810.74	2592.95	2103.42	1228.39	2451.5	3140.93	2231.06
Bradi1g10940.1	0.0421487	0.0554718	0.988045	0.946705	0.0386833	0.560536	0.0386833	1.04372	0.654925	1.04372	0.932996	0.654925	0.850902	MAAAAPSAARGLPRLLLLLLVAVLVLLGDGTGRVQAAVDTGGLSRAAFPKGFVFGTAASAFQVEGMAASGGRGPSIWDPFVHTPGNIAGNGNADVTTDEYHHYKEDVELMKSLNFDAYRFSISWSRIFPDGEGRVNEEGVAYYNNLIDYVIKKGLIPYVNLNHYDIPLALQKKYDGWLSPKIVNIFSDYAEFCFKTYGDRVQNWFTFNEPRIVAALGFDTGIDPPNRCTKCAAGGNSATEPYTVVHNILLSHATAVARYRNKYQASQKGKIGIVLDFNWYEPLTNSTEDQAAAQRARDFHVGWFLDPLVNGQYPKTMQDIVKERLPSFTSEQSKLVKGSADYFGINQYTASYMADQPTPQQAPTSYSSDWHVSFIFQRNGKPIGPLANSNWLYIVPTGM…	174912	173899	264505	289854	225792	180413	248634	252975	260637	235665	216987	215886	191231	218550	210663	114799	114188	183162	179359	147877	229077	176476	196014	166942	192127
Bradi1g10950.1	0.00475454	0.00821239	0.760142	0.218881	0.0776605	0.666737	0.0776605	1.22105	0.709747	1.10842	1.22105	0.709747	0.874898	MELIRILIIIVSLLPFAASDRQGDALYDMKLKLNATGTQLTDWNQNQVNPCTWNSVICDSSNNVVQVTLASMGFTGVLSPRIGDLEHLNVLSLPGNKITGGIPEQLGNLSSLTSLDLEDNLLVGEIPSSLGHLSKLQLLILSQNSLNGSIPDTLATISSLTDIRLAYNNLSGSIPAPLFEVARYNFSGNNLTCGANFANACVSSSSYQGASRGSKIGIVLGSVGGVIGLLIIGALFIICNGRKKNHLREVFVDVSGEDDRRIAFGQLKRFAWRELQLATDNFSEKNVLGQGGFGKVYKGALPDGTKIAVKRLTDYESPGGESAFLREVELISVAVHRNLLRLIGFCTTQTERLLVYPFMQNLSVAYRLREFKPGEPILDWTARKRVAIGTARGLEYLHE…	90235.6	94309.6	153126	126999	116168	117168	165006	115897	116978	128762	133130	159842	142817	131599	141847	72205.9	77067.7	97143.8	83380.9	82449.6	88383.7	107369	104081	106706	101635
Bradi1g11150.1	0.25027	0.274037	0.466118	1	0.939106	0.529342	0.466118	1.17196	0.928249	1.17196	1.00272	0.928249	1.15931	MQAGWSLPRLCVQTQATGSSRASRGRLQHSAGSQVHAAAAAAEQSNPAPLKTRPLRSESQPRVCSSLFHQKKRDTAGGILLARTSSRRRINKSAHGPGAMGTVLDSNFLALTAIVTVGYQLVFFIITALLKFDKVTDFAGSTNFVIIAVLTLVLKGTWHFRQIVLTVLVVIWGLRLAVFLLMRILKWGEDKRFDEMRGNLGKLAVFWTFQAVWVWTVSLPVTIVNASNRNPSIEARDIIGWIMWVVGLSVEAIADQQKLKFKNSPSNRGKWCNVGLWSYTRHPNYFGEIFLWWGVFVASAPVLSGAEWLVILGPIFLTLLLLFVSGIPLLEASADKRFGRSEEYHAYKKSTSPLIPLPPVVYGALPDWFKVAFLLELPLYNPGPEREPVSVS	850416	731420	784542	1.16391e+06	882572	914763	946275	1.3503e+06	926029	1.03434e+06	870900	1.04401e+06	818116	806872	884975	813319	887376	780609	795683	819247	987515	1.24859e+06	943336	913268	1.02318e+06
Bradi1g11290.1	0.133928	0.155481	0.392547	0.854015	0.884591	0.0537343	0.0537343	1.245	1.06473	1.13788	1.07025	1.06473	1.245	MSTAEATREENVYMAKLAEQAERYEEMVEFMEKVAKTADVGELTVEERNLLSVAYKNVIGARRASWRIISSIEQKEESRGNEAYVASIKEYRTRIETELSKICDGILKLLDSHLVPSATAAESKVFYLKMKGDYHRYLAEFKAGAERKEAAENTLVAYKSAQDIALADLPTTHPIRLGLALNFSVFYYEILNSPDRACNLAKQAFDEAIAELDSLGEESYKDSTLIMQLLRDNLTLWTSDNADEGGDEIKEASKPEGEGH	2.42905e+06	2.37915e+06	3.18084e+06	3.68452e+06	2.91839e+06	3.28553e+06	3.29553e+06	3.52893e+06	3.1731e+06	3.32077e+06	3.05588e+06	3.68691e+06	3.01669e+06	2.73412e+06	3.1234e+06	3.36347e+06	3.28105e+06	2.86807e+06	2.91662e+06	3.1073e+06	3.8962e+06	3.67312e+06	3.6745e+06	3.28978e+06	3.6334e+06
Bradi1g11317.1	0.101165	0.120772	0.80546	0.227467	0.937482	0.950334	0.227467	1.64349	0.70586	0.70586	1.64349	0.799967	1.18645	MEALNELCDLVAANPDLLLADKLTWLSSRCAPASSSSPQRASRAHLHSLLALARLLPAGAAGGSPPPPLLAFLSSHAFLSPAFWPQSFAPAPFLSKLLPLLASAPASPALSSALSSAILAALDVADPASAPLARAFLSAVAANPPQLLPADSAPVGERLLLEFPASEEAPPRAKGKGEDAAGEENGGIKEVVQRFEEEGVEVLERKEVAFRLLVHMMGGEGGLEADKVVKVRNAAARQVRSLTDFLKIRKRDWREQGPQLKARINTKLLCCQAAVVVLVRSVSAMETDSKSSKDMLQQTLAWFIEATKSCILSSWRKLKVCEELFCTLLNGISQITVSRGGQLLPVLLIPLKPLVVSTCSQADMTGCSPGALFEAVVKLSCEIIEFGWTKDRALVDTFI…	37909.5	24637.4	18777.8	18974.5	25074.8	14895.3	19042.3	17323.3	19536.2	17699.3	26411.5	19315.4	55957.7	63156.2	41210.2	16193.2	11939.1	31120.2	20983.6	20059	20300.3	20419.3	36998.9	41281.4	29750
Bradi1g11430.1	0.0161386	0.0238979	0.698553	0.195145	0.00513598	0.0797934	0.00513598	0.903202	0.634482	0.903202	0.814301	0.634482	0.766411	MARLVLALSLLSAWGAEADLADDARALLAFRAAVGRHLAWNATDLGSACSWTGVTCDGGRVAMLRLPGRALAGDVPAGSLGNLTALHTLSLRFNALSGSLPADLASATALQNVILNGNKLSGDFPPAILALPGLVRLALDGNDLSGPIPPALANLTRLKVLLLNNNRFVGQIPELTAQLQQFNVSFNQLNGSIPSSLRSKPREAFLGMTGLCGGPLGPCPGEASPSPAPAVKPSSPTTPATDGENSPNGGENGEKNKKLSGGAIAGIAIGSVLGAALLLFLLICLCRRSGRTKTPALQMPPPSPTSALVAGSRKPPEVTSGAAVAPMNTVGHPQVSLGQSTSGKKLVFFGSAANVAPFDLEDLLRASAEVLGKGAIGTTYKAVLESGATVAVKRLKDVT…	37772.7	27208.2	46898.3	48569.3	40112.1	33074.3	35820.2	35848.4	40174.6	36229.4	34327.4	34947.9	32568.1	28810.1	32663.4	17971.9	25846.7	27888.2	30094.9	25450.4	29664.4	31987	29190.4	32127.7	30742.4
Bradi1g11440.1	1.30644e-06	9.51408e-06	0.0119245	7.10688e-07	1.15772e-05	2.55454e-07	2.55454e-07	0.840241	0.610296	0.840241	0.620077	0.678473	0.610296	MVLFTVSKKDTKPFDGQKPGTSGLRKKVTVFQQPHYLANFVQSTFNALPADRVKGATIVVSGDGRYFSKDAVQIITKMAAANGVRRVWVGQDSLLSTPAVSAIIRERIAADGSKATGAFILTASHNPGGPTEDFGIKYNMENGGPAPESVTDKIFSNTKTITEYLISDDLPDVDISVIGVTTFSGPEGPFDVDVFDSATDYIKLMKTIFDFESIKKLLASPKFSFCFDGLHGVAGAYAKRIFVDELGASESSLLNCLPKEDFGGGHPDPNLTYAKELVDRMGLGKSTSNVEPPEFGAAADGDADRNMVLGKRFFVTPSDSVAIIAANAVQSIPYFASGLKGVARSMPTSAALDVVAKNLNLKFFEVPTGWKFFGNLMDAGMCSVCGEESFGTGSDHIRE…	799939	987976	947193	946748	920464	712527	782033	793974	805110	773411	605334	497169	574498	606032	570758	637123	622445	619738	618735	624510	545584	661313	460610	579514	561755
Bradi1g11500.1	0.133621	0.155258	0.656708	0.309486	0.999993	0.902045	0.309486	1.16899	0.890242	0.890242	1.16899	0.994648	1.06777	MATMGSLIGLVNRIQQACTVLGDHGGGGGAGGSLWEALPSVAVVGGQSSGKSSVLESIVGRDFLPRGSGIVTRRPLVLQLHKTDGGQEYAEFLHAPRRRFSDFAAVRKEIADETDRMTGKTKAISNVPIHLSIYSPHVVNLTLIDLPGLTKVAVEGQPESIVQDIENMVRSYVDKPNSIILAISPANQDIATSDAIKLAKEVDPSGDRTFGVVTKLDLMDKGTNAIDVLEGRSYRLQHPWVGIVNRSQADINKNVDMLAARRKEQEYFQSSPDYGHLAHKMGAEYLAKLLSQHLEAVIKAKIPSIIAMINKTVDEIEAELDRLGRPIGGDAGAQLYTILDMCRAFDRVFKEHLDGGRPGGDRIYGVFDHQLPAALKKLPFDKHLSLQNVRKVISEADGY…	253764	282251	249954	226544	253128	199756	235759	214478	251390	225346	284771	304288	310397	284161	295904	182014	199334	310701	315046	251774	280062	249281	283828	267960	270283
Bradi1g11670.1	1.20545e-06	8.88607e-06	3.86451e-05	3.52019e-07	5.42033e-06	6.69073e-07	3.52019e-07	0.51522	0.331477	0.51522	0.331477	0.33427	0.364254	MLLHGLWDKVTGKNKEAWKEGRIRGTAVLVKKDVLDLGDFHASLLDGVHKILGCEDGVAFHLVSATAADPNNGERGKVGKAAHLEELVVTMKSTAAGESVFRVAFEWDDSQGIPGAVIVRNTNRSEFLLKTLTLEGVPGRGTVVFVANSWIYPAAGDRVFFANDTYLPSKMPVLLVQYRQDELRNLRGDSKAGPYEEHDRVYRYDYYNDLGEPDKGEDHVRPMLGGSQEHPYPRRGRTGRRPTKTDPKSESRLPLLNLKKALNIYVPRDERFGHLKLSDFLGYSLKAITEAVVPIIRTYVDTTPKEFDSFQDIMNLYDGLLEVPHSPALAEIKKKIPFDFIKSILPVAGDDFLNLPFPHVVKSDRSAWRTDEEFAREMLAGVNPVCIRRLTEFPARSTL…	128228	161702	150511	104045	136122	65184.6	61373.4	65512.4	88459.9	70132.6	44351.7	41425.4	45682.7	49024.8	45121.2	68561.8	35359.9	46841.2	31242.4	45501.3	54169.6	40244.2	52946.8	50970.5	49582.8
Bradi1g11680.1	0.00247004	0.00465376	0.0194328	0.0164151	0.212349	0.000595344	0.000595344	0.794046	0.467764	0.655122	0.645494	0.794046	0.467764	MIIGGIIKKIKESKNAQLKGTVVLMRKNVLDLNDFGASLLDGIGEFLGKGITCQLISSTLVDTNNGNRGKVGAEAELEQWITSLPSVTTGESKFGVTFQWEVEKLGVPGAIIVKNYHSNEFFLKTITLDNVPGRGKLTFVANSWIYPATKYRYNRVFFANDTYLPSQMPPALRPYRDDELRNLRGDDQEGPYEEHDRVYRYDVYNDLGKDRPVLGGNADYPYPRRGRTGRKPSRKQPQLESRLKSILQQIYVPRDEKFGHLKMSDFIGYSIRAITQGILPAVRTLVDCTPGEFDSFQDIINHYEGGIKLPNIPALEELRKRFPLQLIKNLLPVGGDFLLKLPIPQIIKQDKHAWRTDEEFAREVLAGINPVMITRLTEFPPKSTLDPAKYGDHTSTITA…	1.53547e+06	2.09524e+06	2.05202e+06	1.06868e+06	1.68785e+06	1.00921e+06	1.14535e+06	919452	1.34899e+06	1.10575e+06	1.15162e+06	971448	1.08155e+06	1.15338e+06	1.0895e+06	1.56591e+06	1.44484e+06	1.26403e+06	1.08615e+06	1.34023e+06	705671	741793	820681	889918	789516
Bradi1g11900.1	1.90938e-09	6.96151e-08	0.999997	0.999999	0.00992574	8.50542e-12	8.50542e-12	217.39	1.5752	1.68296	1.5752	57.6002	217.39	MALLRFLIIIIYQKGCENKVMARRDTTCVDQTQRPSHGSCGVIELSQWKPRLRRSTGPSVSMAHCSQVTTTKRTMLNVSLQKEKEKFNLPLVLGFIALFPFRRLPEWRGRGNGMDTVAGPRAKQKLGRPLIPPNYVSLRHLQELRLKEEEQRQREEEEAAARVREEQRRREEEEAAERRRVVEEQRRRDEEEAAARRRVLEEQRRREEEEAAARRVKEAAAAAPMKPSSSSNTSFGYKERSRGGQRSVVVAHRRRPPSRGEGTAMKSDGATGGCHGQKGPDGDAANAPLGTGRKAQNEGKEKDKVLATISGGSGEPTGEATASLYGGNPEEKKKVEASGYQGSASGMMSSAPGELAEAGIGSHRGSGRQKHKHKGKKGLDGRSIEIALSSMTGKQDSSP…	445.323	50.2324	229.253	160.707	221.379	295.806	415.941	200.402	578.14	372.572	365.129	202.81	456.829	370.095	348.716	16424	9839.91	9775.92	14966	12751.5	33100.4	48196.7	56816	54388.9	48125.5
Bradi1g12040.1	0.0181068	0.026378	0.999997	0.843511	0.0714562	0.0236108	0.0236108	0.991276	0.386355	0.991276	0.844173	0.500326	0.386355	MGRLCSRRSVSFPVLLLLCCLSWQSCWLLHALPLCTDSRAPVALNGTLGFCSYRGSSCCDVAADAALQKQFKAMNVSDAPCAAVLKSVLCAKCNPFSADLFNSSSKIRMVPLLCNYTSSGSRSSQSKDSTQDYCKLVWETCKNVTILNSPFQPSLQGSARLPNSSSKLIDVWQSESTFCTSFGGSSNDQSVCFDGNAISFNTTEPPPSPKGVCLEKIGDGSYLNMAPHPDGSNRVFLSNQAGKIWLANVPEQGSGSTLQFDEANPFIDLTDEVHLDSEFGLMGIAFHPKFATNGRFFVSYNCDRTQSPSCAGRCSCNSDVECDPSKLGTDNGAPPCQYQVVVSEYSAKASSSNISAVTSANPSEVRRIFTMGLPYRAHHGGQILFGPADGYLYLMMGDG…	5562.62	8067.48	7740.13	5701.03	6767.81	7003.85	4729.69	6229.19	8872.36	6708.77	5614	3866.88	5640.24	7731.7	5713.2	3052.14	2005.24	6390.28	2096.79	3386.11	1541.21	1030.61	6372.06	1515.25	2614.78
Bradi1g12190.1	0.757727	0.766247	0.977564	0.576583	0.999963	0.996213	0.576583	0.979047	0.69174	0.890169	0.69174	0.979047	0.932141	MRSGGGGGREDDEAGQKLKSMDVDKMENGADDSPRPLVKYHGWKAMPFIIGNETFEKLGTLGTSANLLVYLTQVFHMQSVDAATLLNGLNGTTSLAPIVGAFLSDAYLGRYLALAIASVASLIGMFFLTLTAGADSLHPPECGAGEVCQKATSYQFAVLFISFAFLVIGSAGIRPCSMPFGADQFDPHTESGKRGINSFFNWYYFTFTSAMLVSATVIIYVQSNVSWPIGLGIPTALMFLACVLFFMGTKLYVRVIPEGSPFTTIVQVFAAAVSKRSLKQAKDPKQDLFDPPHTSNVVSKLAHTDQFRCLDKAAMVASPEEVRPGGAAPVNPWRLCTVQQVEEVKCLIRIVPVWSTGIIYYVAVVQQSTYVVFSALQSDRRLGSSFHVPAASFTVFAML…	34545.7	28978.3	34530.8	53324.5	37844.8	30754	33839.5	37660.4	32499.2	33688.3	35427.4	30009	22375.4	16903.3	26178.8	35508.2	20190.1	53765.1	38744.1	37051.9	42058.9	65527.1	17097.9	16422.8	35276.7
Bradi1g12470.1	0.679289	0.690551	0.999168	0.959917	0.73329	0.990907	0.73329	1.06324	0.817091	1.03388	0.904197	0.817091	1.06324	MFNKIIKRGNRKGTRSEGAEPAARPAAPSSSSGGAGAAAPVTVNHASRASAPSPSSPTSPHVAPSAFPAVPASHTSPPLLEPLPLLRDVAAADRPGLLLRKLRLVAALFDFSDSLKHPREKEAKRQALLELVDYVQAPAAAANANAPARLPDNVQEALIAAISVNIFRPLPPAPYESAAAIDPGATPDDEEEPYLDPAWPHLQLVYELLLRYVVSPDTDTKIAKRYVDHAFVLRLLDHFDSEDPREREYLKTVLHRIYGKFMVHRPFIRKAINNVFYRFIFETERHNGIGELLEILGSIINGFALPMKEEHKLFLTRALIPLHKPKSVGIYHQQLSYCIVQFVEKDYKLADAVIRGLLKYWPVINCQKEVLFLGELEEVLEATQPTEFQRCMVPLFKQI…	25505.7	16029.4	24625.2	24261.3	22605.4	13663.7	31478.2	20382.9	27960.1	23371.2	22512.8	23332.8	16002.4	19911	20439.7	15310	15595.3	18179.9	24797.5	18470.7	17882.6	20482	36095	21679.9	24034.9
Bradi1g12787.1	9.93023e-05	0.000286237	0.905401	0.0309521	0.995382	0.0034258	0.0034258	1.33393	0.756398	1.05445	0.756398	0.977001	1.33393	MAEVEYRCFVGGLAWATDDRGLQDAFSSFGEIIDSKIINDRETGRSRGFGFVTFASEQSMRDAIEGMNGKDLDGRNITVNEAQSRGGGGGRGGGGGGGYGGRREGGGGGYGGGGGGYGGGGGGGYGQRQGGGGYGGGGGYGGGGGGYGGSRGGSGGGNWRE	64793.1	73031.3	74269.3	69451.6	70386.3	64930.3	75636.3	80234.3	76073.4	74218.6	56199.1	57535.3	43448.7	55777.3	53240.1	55257.8	70772.5	76974.3	72065.4	68767.5	84186	106403	83432.5	101539	93890.2
Bradi1g12820.1	0.633076	0.647967	0.962326	0.999579	0.999972	0.465788	0.465788	1.10822	1.00595	1.03906	1.01183	1.00595	1.10822	MASVADLKEKHAAATASVNSLRERLRQRRQLLLDTDVERYSKAQGRTAVSFNQTDLVCCRTLQGHSGKVYSLDWTPEKNWIVSASQDGRLIVWNALTSQKTHAIKLHCPWVMTCAFAPNGQSVACGGLDSACSIFNLNSQVDRDGNMPVSRILTGHKGYVSSCQYVPDQETRLITGSGDQTCVLWDVTTGQRISIFGGEFPSGHTADVLSLSINPLNTNMFVSGSCDTTVRLWDLRIASRAVRTYHGHEGDINSVKFFPDGQRFGTGSDDGTCRLFDMRTGHQLQVYNREPDRNDNELPIVTSIAFSISGRLLFAGYSNGDCYVWDTLLAEVVLNLGTLQNSHDGRISCLGLSSDGSALCTGSWDKNLKIWAFSGHRKIV	50198.8	48237.6	56800.5	55210.4	52611.8	56682.2	56498.6	45674.2	59813.3	54667.1	51536.8	59714.5	48567.8	53117.6	53234.2	53388.6	56594	45752.8	55964.5	52925	69742.8	54952.1	57858.2	50668.9	58305.5
Bradi1g13232.1	0.000442962	0.00103563	0.0023319	8.20347e-05	0.0062821	0.00904279	8.20347e-05	2.82343	2.08508	2.28961	2.82343	2.13971	2.08508	MAGSRQLAVAALLLVAAAGVCTRLPPAGALGVNWGTMASHQLPPSSVVRMLQDNGIKKVKLFDADAGPLEALAGSGIEVMVAIPNIMLDMMTDYDTARDWVHKNVSAYNFDGGVNIKYVAVGNEPFLSSLNGTFLNVTFPALQNIQRALNEAGVGDTVKATVPLNADVYESPKDNPVPSAGRFRAEISGLMTEIVQFLNQSGAPFTVNIYPYLSLYGNAGFPLDFAFFDGTTSPVVDTNSGISYTNVFDANFDTLVSALNAAGVGGLPVMVGEVGWPTDGDKQATAAYAQRFYAGLLKKLASNAGTPLRANQYVEVYLFSLIDEDVKSVAPGNFERHWGIMRYDGQPKYAMDLTGQGRNTALVGARGVEYLPRAWCVLNANAPAESMSRLGDNVDYACS…	16712.1	23064.4	29220.6	26658.9	23914	69633.2	50433.4	46012.9	52935.6	54753.8	63816.4	66512.2	69032	70717.1	67519.4	72823	51323.7	40295.1	40233.9	51168.9	57980.4	32520.2	52214.8	56735.3	49862.7
Bradi1g13290.1	0.00569428	0.00958999	0.967882	0.375055	0.0540828	0.373109	0.0540828	1.71103	0.590177	0.873337	0.590177	1.71103	1.41074	MASHIVGYPRMGPKRELKFALESFWDGKSSAEDLEKVATDLRASIWKQMSEAGIKYIPSNTFSYYDQVLDTTAMLGAVPDRYSWTGGEIGHSTYFSMARGNATVPAMEMTKWFDTNYHFIVPELGPETKFSYASHKAVSEYKEAKALGVDTVPVLVGPVSYLLLSKPAKGVEKSFSLLSLVGSILPIYKEVIAELKAAGASWIQFDEPTLVKDLDAHQLAAFTSAYTDLESSLSGLNVLIETYFADVPAESYKTLTSLSGVTAYGFDLVRGTKTLDLVKSVGFPSGKYLFAGVVDGRNIWADDLAASLSTLQSLEAVVGKDKLVVSTSCSLMHTAVDLVNETKLDSEIKSWLAFAAQKVVEVNALGKALAGQKDEAYFAANAAAQASRKSSPRVNNEEV…	172422	146892	163583	151642	158635	118616	122591	162454	150504	138541	138718	84150.6	110375	41246.7	93622.5	230550	251053	271951	332161	271429	216558	351673	72327.8	254607	223792
Bradi1g13430.1	0.0600713	0.0762335	0.994001	0.749255	0.0629713	0.09077	0.0629713	0.930143	0.395759	0.930143	0.780012	0.395759	0.441409	MNVSLSMREKFHRKIEICFHGNVSMGLCQCEIGEWQVLQDGMWNAVKSPYGIKYVDVKLADKKSTAFNLSIQEDFQKWRLACLGIGFVLLFLSPIVSKWAPFYYSSSMALGILLVVLIVLFQGMKLLPMGRKSLLYLTIYGSALGVGSYAVHYFSTLVASILENFGWSEEMHNPVSIFLLVAVVLTGAGFGYWMVRRFILSKDGSVDAGIAQFVKWAMRVVAIFFVMQSTLDPILALVALTTSWSVCSVLTANKVQEPMAPKQKQLKVSSQPKFTQVSPSTRQVQFLSPSSRMNIGRGPSNSPATQYGWNNLANGGLVPSTVTKRVLPNRDEDHYSTFHNIEPRKYSKREWEEFSEESTRNALMEHTATPEFAQWAADNAHRMRVERDDASEDDTIESS…	22356.1	34509.3	15025.6	11194.7	20771.4	34380.9	10554.3	17304.4	15042	19320.4	11671.7	17458.8	18197.4	17479.8	16201.9	6866.07	9606.06	7013.49	9396.31	8220.48	7781.71	6249.99	11488.5	11154.5	9168.68
Bradi1g13630.1	3.00498e-06	1.7851e-05	0.612138	4.5663e-05	3.22193e-05	6.2357e-06	6.2357e-06	0.887969	0.317015	0.887969	0.40186	0.338248	0.317015	MVFVKTQKTRAYSKRFQVKFKRRRQGKTDYRARLRLTNQDKNKYNTPKYRFVVRFTNKDVTAQIVYATIAGDIVMAAAYSHELPRYGLEVGLTNYAAAYCTGLLLARRVLKCRDLDQEYEGNVEATGEDFSVEPSGERRPFRALLDVGLIRTTTGNRVFGALKGALDGGLDIPHSDKRFAGFKKDEKQLDSEVHRKYIYGGHVADYMRSLADEEPEKYQSHFSEYIKKGISADDIESVYKKVHAAIRADPTLVKSTKEAPKTHKRYNLKKLTYEQRKASLVERLNALNSSAGAADDEDDDE	15703.7	26096.2	27709.8	18747.5	22064.3	18816.6	17246.5	20900	21406.6	19592.4	6404.73	8322.48	11088.2	9651.58	8866.75	7681.68	8528.32	7934.89	5707.91	7463.2	6865.61	4498.51	8496.05	8118.71	6994.72
Bradi1g13640.1	0.0355829	0.0479533	0.0978258	0.0150239	0.0303145	0.0937074	0.0150239	0.680729	0.549741	0.680729	0.549741	0.596807	0.677971	MFGRAPKKSDNTKYYEILGVPKNASQDDLKKAYRKAAIKNHPDKGGDPEKFKELAQAYEVLSDPEKREIYDQYGEDALKEGMGGGGGGVDPFDIFSSFFGPSFGGGGGSSRGRRQRRGEDVIHPLKASLEDLYNGTSKKLSLSRNVLCSKCKGKGSKSGASMRCPGCQGSGMKVTIRQLGPSMIQQVQHACNECKGTGESINEKDRCQGCKGEKVVQEKKVLEVHVEKGMQHNQKITFPGEADEAPDTVTGDIVFVVQQKEHPKFKRKGDDLFYEHTLSLTEALCGFQLVLTHLDNRQLLIKSNPGEIVKPDSFKAISDEGMPMYQRPFMKGKLYIHFTVEFPDSLAPEQCKALEAVLPPKPVSKLTDMELDECEETTLHDVNNMEEEMRRKAQAAAQE…	10476.5	9791.82	11889.5	8674	10207.9	6964.94	4872.71	7834.5	8123.23	6948.85	4848.4	8634.01	3830.37	5134.14	5611.73	8140.05	5845.34	2570.35	7812.94	6092.17	9136.38	5485.07	4970.41	8090.91	6920.69
Bradi1g13670.1	0.00989029	0.0154421	0.885021	0.999974	0.327761	0.0229356	0.0229356	1.0576	0.746232	1.0576	1.00612	0.866861	0.746232	MAAASAPLLLALALASASILASLAAGDTNGVYDPCSDSRIQRGDGFTFGLAFAGSSAFFSGSTQLSPCDRRLNLANPSQLAVFRPKVDEISLLTVNTTTGFSPASAGGYMVAFAGRKYAARSAPVFVSNSSVTVSSFTLVLEFNKGRLQNLHWKKDGCGACSGKSNFICLGKQTCAIRTNVCKSQNQGTMDCSIGIQLAFSGTDKHESVLNSWYEVSNLQQYSLYGLYSNVKGSLSGQFNKFF	388514	434614	550345	547960	480358	510803	535465	474689	511151	508027	429557	547642	467299	488699	483299	421807	417909	425581	400318	416404	328172	273089	439725	392850	358459
Bradi1g13777.1	1.41586e-07	1.73636e-06	0.097619	0.00754395	6.20994e-06	5.43028e-09	5.43028e-09	8.22578	2.59271	2.59271	3.49036	6.1065	8.22578	MAAASSLHVAAPAATPRVGSAGRKSSSPAVRSVRVARSGAEARPRGRLVSCGAVATKADAPATAGASKSDGHEVLLFEALREGLMEEMQSDPTVCVFGEDVGHYGGSYKVTKGLADMFGDLRVLDTPIAENSFTGMGVGAGMKGLRPVIEGMNMGFLLLAYNQISNNCGMLHYTSGGQFKIPVVIRGPGGVGRQLGAEHSQRLESYFQSIPGLQMVACSTPYNAKGLMKAAIRSENPVVLFEHVLLYNLKEKIPDEEYVLCLEEAEMVRPGEHVTILTYSRMRYHVMQAAKTLVNKGYDPEVIDIRSLKPFDLHTIGNSIKKTHRVLIVEECMRTGGIGASLRSAIIDNFWDYLDAPIMCLSSQDVPTPYAATLEDATVVQPAQIVAAVEQICQ	3867.96	2399.82	2593.21	1150.29	2502.82	5410.19	6659.26	6963.02	6923.85	6489.08	9845.81	8389.52	8965.73	7741.87	8735.73	11236.9	14989.4	18343	16564.5	15283.5	15904.4	19367.7	25656.8	21421.5	20587.6
Bradi1g13850.1	0.00010031	0.000288298	0.0330069	0.000184036	0.000379798	6.43696e-05	6.43696e-05	0.699595	0.388815	0.699595	0.416185	0.463439	0.388815	MALAISMEAIDARARELGIDIDSVDVDSITLPPGEDFDILSDDEDLLHNEDLPELEMGFANIIVVDNLPVVPPEKYEKLENVVRKIYSQIGVIKEGGLWMPTDPETKKTLGYCFIEYNTPQEAELAREKTNGYKLDKSHIFAVNMFDDFDKYMKVPDEWAPAEIKPYTPGENLLKWLTDEKARDQFVIRAGTFTEVYWNDARRAMPELVYQKQYWTDSYIQWSPLGTHLATVHRQGAQVWGGDDKFVRLMRFAHPQVKLIDFSPGEKYLVTYSSHEPSNPRDTHRVVLNIFDVRTGKVMRDFKGSADEFTTGGSIGVSGVSWPIFRWGGGRDDKYFARLGKNVISVYETETFSLLDKKSLKVENVVDFSWSPTDPIISLFVPELGGGNQPARVSLVQIP…	13704	20090.4	15537.6	11451.5	15195.9	9905.28	10201.9	9350.77	13065.8	10631	7670.84	5778.26	4646.55	7201.51	6324.29	6982.69	6543.57	9538.32	5104.85	7042.36	6442.61	4730.97	4510.86	7949.11	5908.39
Bradi1g13890.1	0.00657462	0.0108606	0.0313435	0.559571	0.00240883	0.050983	0.00240883	0.84822	0.477286	0.635515	0.84822	0.477286	0.666791	MAASVKLGSKPDAFRRQGQAWFCTTGLPSDVTVEVGDMSFHLHKFPLLSKSAVLEQLIEESSDQEECTITLSDIPGGTKSFELVARFCYGVKIELSSANVVYLRCASEHLQMTEEISEDNLIAQSEMFLNQVVLRNWKDSLKALETCDDLLPHAEDLQIVKRCIESLAAKATTDPNLFGWPIREHGIMQSPGGSVLWNGISTGARPRNFSSDWWYDDASALSFPMYKRLISAMESRGVRPETIAGSLAYYARKYLPGLNRRNSTGIAPPTATLSEVEQKNLLEEINTLLPVQKGLASTKLLLGLLRIAMIQRASSTCISDLEKRVGMQLDQASLEDLLLPNFSYTMETLYNVECVHRILEHFLAMDQANGGASPCMDDVMASPSMIPITAVAKLIDGYL…	52614.6	50141.3	83898.1	89580.3	69058.6	33752.7	48057.7	42542.3	51198.3	43887.8	49097	61965.1	53193.8	70051.5	58576.9	22869.6	39539.1	35354	34080.2	32960.7	42423.5	55904.7	51998.7	33863.8	46047.7
Bradi1g13900.1	2.72015e-07	2.80113e-06	0.0538354	3.54609e-06	6.73067e-07	8.89518e-08	8.89518e-08	0.803679	0.324375	0.803679	0.432581	0.324375	0.37652	MAEAEAEADVGGGVRRRQRGCAGEFFPEASFSSWAAYGRALRSTGPRLADRLTSRSLEATELHEVRARSGADMKRDLTWWDLAWFGVGAVIGAGIFVLTGQEAKEVVGPAVVISYVVSGVSAMLSVFCYTEFAVEIPVAGGSFAYLRVELGDFMAFVAAGNILLEYCIGSAAVARAWTSYFATLLNHQPAQFRIHASSLAADYSELDPIAVVVITLICAFAVVSTKGSSRFNYVLSIVHIAVILFIIVAGLTKADTANMRDFMPYGPRGIFAASAVLFFAYIGFDAVSTMAEETKDPARDIPIGLVGSMAITTALYCVLAVVLCLMQPYGDIDKDAPFSVAFAARGMDWAKYIVAFGALKGMTTVLLVSAVGQARYLTHIARTHMMPPWLAEVHPRTGT…	149947	120938	118114	110134	124783	88894	77642.1	116558	118048	100286	61823.8	50263.2	56419.3	47409.3	53978.9	43796.9	46150	35094.7	36864.7	40476.6	50500.5	37901.9	45123.8	54407.5	46983.4
Bradi1g14000.1	0.000557323	0.00126969	0.717493	0.0429556	0.00292526	0.000411596	0.000411596	1.73765	1.14244	1.14244	1.40001	1.6009	1.73765	MASSTSEVPEGKSKLKKSGSLGSSDTYVRADKIDLTSLDIQLEQQLTKKWGKANLKSQGPKADWEIDLAKLEIRYVIAQGTYGTVYRGTYDGQDVAVKLLDWGEDGFATEAETAALRTSFKQEVAVWHKLSHPNVTKFVGASMGTADLKIPANDSGARANLPARACCVVVEYLAGGTLKQYLIKNRRRKLAYKVVVQLALDLSRGLSYLHSRKIVHRDVKTENMLLDTQRNLKIADFGVARVEAQNPKDMTGATGTLGYMAPEVLDGKPYNRKCDVYSFGICLWEIYCCDMPYPDLSFADVSSAVVHQNLRPDVPRCCPSAFANIMRKCWDANPDKRPDMDEVVQLMEALDTSKGGGMIPDGQSSGCLCFTRARGP	77526	67064	77238.1	81047.2	75718.8	99813.3	85735.4	81974	78493.5	86504.1	105505	84468.6	127700	106357	106007	110855	102148	136771	135099	121218	111345	121600	159453	133895	131573
Bradi1g14010.1	0.808562	0.81521	0.999999	0.995757	0.997349	0.828151	0.828151	1.147	0.950642	0.994528	0.950642	0.956352	1.147	MASSTSEVPEVKSKLKKSGSLGSSDTYVCADKIDLTSLDIQLEQQLTKKWGKANLKSQGPKADWEIDLAKLEIRYVIAQGTYGTVYRGTYDGQDVAVKLLDWGEDGFATEAETAALRSSFKQEVAVWHKLSHPNVTKFVGASMGTTDLKIPANDTGARANLPVRACCVVVEYLAGGTLKQYLIKNRRRKLAYKVVVQLALDLSRGLSYLHSQKIVHRDVKTENMLLDTQRNLKIADFGVARVEAQNPKDMTGATGTLGYMAPEVLDGKPYNRKCDVYSFGICLWEIYCCDMPYPDLSFADVSSAVVHQNLRPDVPRCCPSAFANIMRKCWDANPDKRPDMDEVVQLMEALDTSKGGGMIPDGQSSGCLCFTRARGP	13224.8	15817.3	23616.7	22233	18723	8504.4	22520.3	20304.8	23152.6	18620.5	13424.4	23853.2	15784.8	18133	17798.9	17533.4	12554.5	21879.8	19655.5	17905.8	18721.3	21162.5	24253	21764.1	21475.2
Bradi1g14410.1	3.10497e-08	5.23575e-07	0.995919	0.7306	1.17726e-08	8.43308e-06	1.17726e-08	157.115	5.04257	5.04257	15.5285	157.115	108.379	MASRIAARLLLRRPTAALSFLQSCRHARHFSTQLLEGVPRFSKPTRARYFLPNASPYQLWSRSFASENGDLIEAVVPFMGESVTDGTLANFLKKPGDRVEADEAIAQIETDKVTIDVSSPEAGVIEKFIASEGDTVTPGTKIAVISKSAAPSETHVSPSEETSQKETPPPPPPEKPKVEEKSSKVESVKPKASKLSSPSEPQLPPKERERRVAMPRLRKRIANRLKDSQNTFAMLTTFNEVDMTNLMKLRSDYKDEFVEKHGVKLGLMSCFVKAAVSALQNQPIVNAVIDGDDIIYRDYIDISVAVGTSKGLVVPVIRDTEGMNFADIEKGINKLAKKATEGALSIDEMAGGTFTISNGGVYGSLISTPIINPPQSAILGMHSIVQRPVVVDGSILARP…	353.906	0	0	76.2655	107.543	639.373	341.511	881.621	306.667	542.293	1509.14	1432.97	3116.03	621.798	1669.98	17331.3	10731.9	18970.9	20552.3	16896.6	9926.2	10957.8	15185	10552.8	11655.4
Bradi1g14450.1	0.0209774	0.0298193	0.332402	0.385319	0.379588	0.301968	0.301968	1.18997	0.789162	0.797189	1.18997	0.808748	0.789162	MAKSSADDAELRRACATAVAASGARGEEVAFSIRVAKGRGIFEKLGRLAKPRVLAVTTKHSSKGEDNKAFLRVLKYSSGAVLEPAKLYKLKHLTKVEVISSDPSGCTFVLGFDNLRSQTVAPPQWTMRNIDDRNRLLFCILNTCKEILSYLPKVVGIDIVELALWAKENTLTLDNQVSTQDGQATSVATQTERKVTATVTVENDLVSQAKDEEEDMEALLDTYVMGIGEADAFSERLKQELVALEAANVYQLLESEPLIEEVLQGLDAASATVDDMDEWLRIFNLKLRHMREDISSIESRNNGLEMQSVNNKGLVEELEKLLERLRIPQEFAASLTGGSFEESRMLKNVEACEWLTGAIRCLEVPNLDPSYVNMRAVREKRAELEKLKTTFVRRASEFL…	15763.5	13332.1	11773.7	7337.02	12051.6	10589.5	9416	8556.47	9867.64	9607.4	14292.5	14742.1	11823.4	16506	14341	9439.45	11601.6	10183.9	7761.88	9746.71	11733.5	8783.61	7753.15	9772.41	9510.66
Bradi1g15050.1	0.00240829	0.0045565	0.239349	0.00442034	0.00278225	0.00329051	0.00278225	0.82463	0.602681	0.82463	0.623794	0.602681	0.609662	MAGTVTVPGSSVPSTPLLKDQLDIVIPTIRNLDFLEMWRPFFQPYHLIIVQDGDPSKVIKVPEGFDYELYNRNDINRILGPKASCISFKDSACRCFGYMVSKKKYVFTIDDDCFVAKDPSGKDINALEQHIKNLLSPSTPFFFNTLYDPYREGADFVRGYPFSLREGAPTAVSHGLWLNIPDYDAPTQMVKPRERNSRYVDAVLTIPKGTLFPMCGMNLAFDRTLIGPAMYFGLMGDGQPIGRYDDMWAGWCVKVICDHLSLGVKTGLPYLWHSKASNPFVNLKKEYKGIFWQEDIIPFFQNATLSKECDTVQKCYISLSEQVREKLGKIDPYFVKLADAMVTWIEAWDELNPSAAASEAVAENGKATK	472365	752866	831811	764493	705384	462081	577435	611855	675352	581681	417995	428289	419950	493821	440014	373650	334207	492149	500479	425121	445196	493052	426677	355258	430046
Bradi1g16000.1	0.00348109	0.00626969	0.302967	0.0204578	0.0018554	0.00608199	0.0018554	0.801706	0.484009	0.801706	0.627579	0.484009	0.554771	MSWWWAGAIGAVKKRQDESAAAAEPSFQSVALVVGSTGIVGTSLLDILPLQDTPGGPWKVYALSRRPLPPWSPPPSPAVTHLHLDLADSAAVADALTPLTDITHVFYVAWSNHPTEAQNREANSAMLRNVLSVVVPNCPALVHVCLQTGRKHYIGPFEAIGKIPAPDPPYTEDMPRLDYPNFYYDQEDVLFDEVSRRGGAVSWSVHRPTTIFGFSPRSAMNVVGSLCVYAAICRKEGATMRWPGSKVAWEGFSDSSDADLIAEHEIWAAVDPFAKNEAFNCSNGDLYKWKQLWPMLADHFEVEWAGYDGEENRFMLTQAMAGKEAVWAEILQENELIRTELEEITNWWFVDALFNVETQHLDSMNKSKEHGFLGFRNTTNSFNTWIEKMKVFKIVP	74737.1	128453	178462	137850	129876	112006	97205.4	104584	102692	104122	83984.9	64808.3	86194.5	91041.2	81507.2	78849.8	54282.3	59626.9	58684.7	62860.9	71763.2	81581.3	82821.4	52038.8	72051.2
Bradi1g16510.1	0.000209747	0.000537924	0.900274	0.000210344	0.020605	0.999967	0.000210344	0.993762	0.576296	0.946908	0.576296	0.750414	0.993762	MAAKCYPTVTDEYQTAVAKAKRKLRGLIAEKNCAPLMLRLAWHSAGTFDVATKTGGPFGTIKCPAELAHGANAGLDIAVRLLEPIKDQFPILSYADFYQLAGVVAVEVTGGPEVPFHPGRQDKPEPPPEGRLPDATQGSDHLRQVFSTQMGLSDQDIVALSGGHTLGRCHKERSGFEGAWTANPLIFDNSYFKELLSGEKEGLLQLPTDKTLLSDPAFRPLVDKYAADEDAFFADYAEAHLKLSELGFGGYFEGCC	415290	422969	374669	276660	372397	377191	406138	308509	318665	352626	205956	209369	182057	261062	214611	299170	276540	277015	265083	279452	341864	362505	390051	385876	370074
Bradi1g16560.1	0.000799943	0.00174333	0.191118	0.0012295	0.999963	0.993699	0.0012295	1.44642	0.97016	1.19401	1.44642	0.991973	0.97016	MGTYKCCFCFRRRYRWTDAPPPDDVRSLFAHHSGGAATMGADGLRRYLESKGTGAEDDNSEAAADRLLDQIRHGQRGARIPRVGRPLIALEEFHRFLFSDDLNPPIRRPQVHHDMTAPLSHYFIYTGHNSYLTGNQLSSDCSDIPIIKALQKGVRVIELDMWPNSTRDDINILHGRTLTTPVSLLKCLRSIKEYAFVVSSYPVIITLEDHLPPDLQDKVAKMVLEVFASILYYPDTEHIKELPSPEDLKGRVLLSTKPPKEYLEAKAGGTIKDGDADPNLGKGAGEDAAWGKEVPDFKTEIQSAKQEDDVSEHHRDDDDEDDDDDEEEQKMQQHLAPQYKHLITIKAGKPKGTTADALRCDPDRVRRLSLSEQELAKAVVHHGTEIVRFTQRNLLRIYP…	2.46915e+06	2.48113e+06	3.31114e+06	2.89436e+06	2.78895e+06	3.84179e+06	3.88256e+06	2.52005e+06	3.07568e+06	3.33002e+06	4.00751e+06	4.20075e+06	4.04641e+06	3.88134e+06	4.034e+06	2.8938e+06	2.6842e+06	2.9112e+06	2.57703e+06	2.76656e+06	2.6495e+06	2.38231e+06	3.17199e+06	2.6191e+06	2.70572e+06
Bradi1g16750.1	0.000591396	0.0013303	0.997755	0.641006	0.00212239	0.00263397	0.00212239	0.972862	0.48884	0.972862	0.870176	0.48884	0.513045	MGQGTPGGMGKQGGGAPGDRNKPGGDGDKKDRKFEPPAAPSRVGRKQRRQKGPEAAARLPHVAPLSKCRLRLLKLERVKDYLLMEEEFVAAQERLRPTEEKTEEDRSKVDDLRGTPMSVGSLEEIIDESHAIVSSSVGPEYYVGILSFVDKDQLEPGCSILMHNKVLSVVGILQDEVDPMVSVMKVEKAPLESYADIGGLDAQIQEIKEAVELPLTHPELYEDIGIRPPKGVILYGEPGTGKTLLAKAVANSTSATFLRVVGSELIQKYLGDGPKLVRELFRVADELSPSIVFIDEIDAVGTKRYDAHSGGEREIQRTMLELLNQLDGFDSRGDVKVILATNRIESLDPALLRPGRIDRKIEFPLPDIKTRRRIFQIHTAKMTLSDDVNLEEFVMTKDE…	9506.35	9640.55	6729.83	5643.98	7880.18	10203.4	6646.9	7719.86	6095.15	7666.32	6941.5	6582.32	6534.13	7370.62	6857.14	3231.48	4191.19	3299.39	4686.52	3852.15	4565.35	3071.54	4382.38	4152.29	4042.89
Bradi1g17200.1	2.42582e-06	1.52917e-05	0.922046	0.000510797	0.0126895	0.0225099	0.000510797	2.2003	0.185052	1.1483	2.2003	0.185052	0.255514	MAPLMNGSCKSEEKKLPGAYVTFLAGTGDYWKGVVGLAKGLRAVKSAHPLVVAVLPDVPASHRQILASQGCLVRAIQPVYPPESQTQFAMAYYVINYSKLRIWEFVEYERMVYLDADIQVFSNIDHLFDLEKGSFYAVKDCFCEKTWSHTPQFKLGYCQQRPDKNVSWPADTPAPPPLYFNAGMFVHEPSMATARALLEKLVVTDPTPFAEQDFLNVFFRDAYKPIPLVYNLVLAMLWRHPENVELDAVKVVHYCAAGSKPWRFTGEEENMEREDVKMLVKKWWDVYNDDSLDFDDSYKELKKKSEAGGVVFDHEAGGKPARRGATAMADGAGAVKYSNTPSAA	8077.5	16395.4	15399.6	8112.24	11996.2	16114.8	20912	6156.56	11917.7	13775.3	22799.1	25587.3	24919.6	32274.9	26395.2	875.187	1557.05	2347.95	4099.5	2219.92	2294.48	2259.64	5443.91	2262.72	3065.19
Bradi1g17236.1	0.00821559	0.0132728	0.488305	0.0158849	0.00441444	0.040063	0.00441444	0.778625	0.350011	0.778625	0.456289	0.350011	0.533699	MADQLTDDQIAEFKEAFSLFDKDGDGCITTKELGTVMRSLGQNPTEAELQDMINEVDADGNGTIDFPEFLNLMARKMKDTDSEEELKEAFRVFDKDQNGFISAAELRHVMTNLGEKLTDEEVDEMIREADVDGDGQINYEEFVKVMMAK	18315.5	29671	46428.7	32910.6	31831.5	18806.6	31338.2	20609.2	28385	24784.8	14797.3	13433.7	14026.5	15839.8	14524.3	15328.4	8464.87	10538.4	10233.7	11141.3	9607.24	9437.52	29684.5	19224.4	16988.4
Bradi1g17460.1	0.0772752	0.0955492	0.895918	0.999881	0.273414	0.267808	0.267808	1.0699	0.819567	1.0699	1.01122	0.820921	0.819567	MFGFGHHHSQAAPPSSGPNQIFKVFCRASDDYVLAVRDGAVVLTPINPKDETQHWLKDMRFSTSIKDEEGMPAFALVNKATGLAVKHSIGQSHPVKLAPFNPAYEDASVLWTESKDVGKGFRCIRMVNNTRLGFDAFHGDKDHGGVHDGTGVVLWEWCKGDNQCWKILPWAEAHAAVDSGAIAGNWAGSGGPPVHSVRVFCKAGEDFSLAARNGTVVLAPTNPRDDYQHWFKDMRHSNRIRDEEGYPAFALINKVTGEAIKHSTGQGHPVKLVPYNPEYQDESVLWTESRDVGKGFRCVRMVNNIYLNFDAFHGDKAHGGVHDGTEVVLWKWCEGDNQRWKILPW	1.52241e+06	1.5532e+06	2.28054e+06	2.22665e+06	1.8957e+06	1.92016e+06	2.2052e+06	1.98164e+06	2.00584e+06	2.02821e+06	1.94487e+06	2.26923e+06	1.55476e+06	1.89903e+06	1.91697e+06	1.57854e+06	1.90224e+06	1.47879e+06	1.26531e+06	1.55622e+06	1.70481e+06	1.61904e+06	1.58448e+06	1.30628e+06	1.55365e+06
Bradi1g17620.1	0.0991529	0.119083	0.999974	0.140841	1	0.883904	0.140841	1.19358	0.936251	1.0067	1.19358	0.998374	0.936251	MDRLSLRSPFHLLLSLHLLLSSFNPLAVADLASEKQALLAFASEVYRGNKLNWDQSTSVCSWHGVTCSGDQSRIFELRVPGAGLIGEIPPNTLGKLDSLQVLSLRSNRLSGSLPSDVALLPSLRYIYLQHNELTGDLPSSFNPNLSVLELSYNSFIGKIPTSLENLTELSLLNLQENSLSGSIPDLKLPSLRLLNLSNNELKGPIPRSLQRFPNGSFLGNPELCGPPLDDCSFSLSPTPSPELPSSPPHPVSPHHEKKPGTGLIIAVAIGGLAVLMLIVVVLIVCLSKRKSKKESGVNHKGKGTGVRSEKPKQEFSGGVQTAEKNKLVFLEGCTYSFDLEDLLRASAEVLGKGSYGTAYKAILEDGTVVVVKRLKDVVAGKREFEQQMELIGRLGNHAN…	137422	128838	155826	139097	140296	151540	142173	132433	138794	141235	142441	153656	178722	194995	167453	128258	111474	159841	160698	140068	130121	124272	152734	118281	131352
Bradi1g17920.1	0.0019822	0.00384747	0.395257	0.00811224	0.00258451	0.00266638	0.00258451	0.660585	0.0492379	0.660585	0.175729	0.0492575	0.0492379	MVSLKLQKRLASSVLKCGKGKVWLDPNEVNEISMANSRQNIRKLVKDGFIIKKPQKIHSRSRARRAHEAKQKGRHSGYGKRRGTREARLPTKILWMRRMRVLRRLLRKYREAKKIDKHMYHDMYLKVKGNMFKNKRVLMESIHKSKAEKAREKTLSDQFEAKRAKSKASRERKIARREERLAQGPKDYAPAAAAAPAPTAAAPKKAKK	13745.6	27327.9	47991.9	39554.1	32154.9	23654.8	41613.9	437.076	19258.3	21241	5891.13	7643.57	1285.48	7782.05	5650.56	4775.27	0	525.275	1034.93	1583.87	651.601	1384.16	1550.76	2746.42	1583.24
Bradi1g17970.1	0.000169309	0.000452273	0.446506	0.00317236	0.000146418	0.000532304	0.000146418	0.81668	0.280723	0.81668	0.467169	0.280723	0.349195	MGIDLVAGGRNKKTKRTAPKSDDVYLKLLVKLYRFLVRRTKSHFNAVILKRLFMSKTNRPPLSMRRLVRFMEGKGDQIAVIVGTITDDKRVYEIPAMKVAALRFTETARARIVNAGGECLTFDQLALRAPLGQNTLLLRGPKNAREAVRHFGAAPGVPHSHTKPYVRSKGRKFEKARGRRNSRGFKV	9944.56	13657.9	9049.2	10628.2	10820	4751.58	7875.49	10868.7	11850	8836.44	4369	5846.8	4534.77	5468.41	5054.75	1544.44	2675.62	3534.1	4395.5	3037.41	2513.8	4316.21	2184.87	6098.23	3778.28
Bradi1g18010.2	9.88877e-07	7.75578e-06	0.00151509	1.39491e-05	4.58346e-06	4.66337e-08	4.66337e-08	0.700722	0.404435	0.700722	0.554766	0.429296	0.404435	MARGAAAAAAAKGGAGGKKKGSVSFVIDCTKPVEDKIMEIASLEKFLQERIKVAGGKAGNLGDSVTVSRDKSKVTVTSDGAFSKRYLKYLTKKYLKKHNVRDWLRVIAANKERNVYELRYFNIAENDGEEED	49129.5	60503.6	47612.3	41162.5	49602	33845.7	34384.8	29142.3	41656	34757.2	28311.8	25932.9	27771.9	28053.5	27517.5	21694.1	18793.3	20312.7	24375.7	21294	17500.3	18396.4	24264.3	20082.2	20060.8
Bradi1g18190.2	8.92876e-06	3.97521e-05	0.20441	0.00137979	4.09199e-06	3.51151e-05	4.09199e-06	0.817185	0.324177	0.817185	0.5697	0.324177	0.359028	MQNEEGKMVDLYVPRKCSATNRIITAKDHASVQINIGHVDENGLYDGRFTTFALSGFVRGQGDADGALDRLWQQKKAELKQ	23709.8	32253.3	23861.5	23272.4	25774.3	14280.7	19903.2	25380.6	24684.8	21062.3	12323	14504.9	16027.1	15879.4	14683.6	10071.8	8508.34	9077.44	5764.1	8355.43	6578.45	9945.56	7744.49	12746.2	9253.67
Bradi1g18340.1	0.0394746	0.0526719	0.9379	0.974811	0.34475	0.118778	0.118778	1.13515	0.475493	1.13515	1.10355	0.627148	0.475493	MVKAVAVLSGSEGVKGTIFFTQEGDGPTTVTGSVSGLKEGLHGFHVHALGDTTNGCMSTGPHFNPAGKEHGAPEDETRHAGDLGNVTAGVDGVANINVVDTQIPLTGPHSIIGRAVVVHGDPDDLGKGGHELSKSTGNAGARVACGIIGLQG	21000.9	36890.1	30627.8	25490.2	28502.3	49272.9	38759.5	18016.3	23368.8	32354.4	26216	40308.1	27100.4	32190.4	31453.7	31328.1	12617.2	16141.2	11414.1	17875.1	11535.8	5248.81	23975.2	13450.6	13552.6
Bradi1g18510.1	0.759313	0.767276	0.866727	0.9113	0.598185	0.602789	0.598185	0.85447	0.736791	0.833113	0.85447	0.736791	0.738366	MSPSSSSSPAGTPSQVLSVRIVSLDYYMAPPLPGFDFTYSPFHCEEVEEVPVIRIYGSTPAGQKTCLHVHQALPYLYVPYPEELLHNIERGNSCMTGLLSDLEKALQVRGPAKRKHIHGCSLVRAKKLYYPHEVSRAATHLLDGAVLNRVFQPYESHIPYLLHFLVDYNLYGMGHVHVTDFKFRPPLPDDFHPNTLHRKPHPGAAAMKNPMIWISSAVPPALILGSFSTSHSMEGSNPNFIRRHTSLMLEADSVVEGIINEKHKMYTPLSQTTTDTKMVQSLLAIWEELEHLRLLEEAKPADIGRPLRDVVLKSFLHGIKYESALSMLDPKEEGSHQKVSAIEDPEKLEKCFKSLTDIIGTITFSQGDYCDNTGSDNPAGTQKEDQNASSVCLESTKQN…	9805.25	8548.7	9146.39	8751.5	9062.96	6047.71	10458.6	6209.51	7486.1	7550.47	9265.88	7069.57	7986.16	6654.48	7744.02	10854.7	4172.15	6246.32	5436.83	6677.5	2673.05	5304.1	14259.6	4530.42	6691.78
Bradi1g18550.2	0.000110791	0.000314278	0.20263	0.00257432	2.47337e-05	0.00170013	2.47337e-05	0.817309	0.390436	0.817309	0.602682	0.390436	0.582034	MKGAELLTLLVASFLCLSAAIAAQETCPADLDAKCGDGASDDWEGEFFPGIPKIKYEGPTSKKPLSYKWYNAEEVILGKKMKDWLRFSVAFWHTFRGTGGDPFGAPTKVWPWEDGTNSLAMAKRRMKAHFEFMEKLGVDRWCFHDRDIAPDGKTLAETNANLDEIVKLAKQLQGETNIKPLWGTAQLFMHPRYMHGAATSPEVKVYAYAAAQVKKALEVTHYLGGENYVFWGGREGYQTLLNTDMKRELEHLANFLQAAVDHKKKIGFNGTLLIEPKPQEPTKHQYDWDVATTFSFLQKYGLTGEFKINVECNHATLSGHSCHHELETARINGLLGNIDANTGDPQVGWDTDEFLTDISEATLVMSSVVKNDGLAPGGFNFDAKLRRESTDVEDMFIAH…	152249	201109	263018	176018	198099	142292	192755	145110	167473	161908	126167	104872	106376	140147	119390	66302.4	71065.5	87369.1	84641.9	77344.7	100527	125661	131273	103738	115300
Bradi1g18710.1	1.38862e-06	9.70597e-06	0.0258871	9.55624e-06	4.7757e-07	3.72585e-06	4.7757e-07	0.806758	0.443374	0.806758	0.569818	0.443374	0.539776	MAVSFSELHTADGLKALEAHLAGKTYISGEQISKDDVKVFAAVPSKPSAEFPNAARWYDTVAAALASRFPGKASGVNLSAAGSSSGPADASKDAEDDDDLDLFGDETEDDKKAAEERVAAKPAKKKESGKSSVLMDVKPWDDETDMKKLEEAVRSVQMEGLTWGASKLVAVGYGIKKLQIMLTIVDDLVSVDTLIEEVLCEEPINEYVQSCDIVAFNKI	195697	245127	246692	221881	227349	174954	200183	166561	191966	183416	137356	138304	108288	134242	129548	133496	101762	88304	79641.4	100801	103398	104161	144045	139266	122718
Bradi1g19060.1	3.60718e-12	2.43304e-09	0.997756	0.979176	4.05766e-06	0	0	12.576	0.763349	1.13034	0.763349	5.06526	12.576	MSVLSWLLLRGYKRPPPPPLARCYHQRAPALPPTQTHLARGRRGWRHEPRKAAAAGLVAYSSMFLLPYAVTLLPLRRVPSTVRVRRIADDIIRGIHLILPNSPSSDEDKPGPQTPDLSELDWEVIVVRDKRANAYCRPGGKIIVNTGFLECLATDAEIVTILAHEVGHAVARHCLELHEVAFVTILPHFTLASRIERGRGGSDRNHATCCRGFRSTRSARGLPEARRDQRKLGMERLRGVPSFGYDKISAFIQSKAMKDAVELYRRKSALGEAPTDVLLWWNS	1840.21	490.266	1671.39	1615.64	1404.38	866.516	1425.08	1565.4	2492.71	1587.43	878.861	1713.55	665.768	1029.94	1072.03	6873.23	6236.09	5844.42	9500.35	7113.52	15551.6	19316.7	17860.3	17917	17661.4
Bradi1g19660.1	9.33184e-05	0.000273073	0.241066	0.880405	0.000740382	0.510755	0.000740382	1.13626	0.646825	1.13626	1.05331	0.646825	0.902701	MDSRAFFLCALAIVASSLLHCARSDGSDDQLLKGINSYRGSLKVPALTENKNADCLAEQLAKQFKDQQCTNTTGSNTVPGTEQQFPDYPKYLDRCHLNASVTEDGQVMPACVPGLVANVVLTNYTKSQYNLYLNDSKYSGVGIANEGDWVVVVLSTNTDSGDYSPAPPGSNWAPSVRPFSQLIVSLVGFVILLLK	526586	601841	683536	640883	613212	772027	673198	633565	708280	696767	654061	613558	589343	726642	645901	392427	318420	413426	462290	396641	615510	453893	605225	539560	553547
Bradi1g19720.1	0.00105485	0.00220961	0.223543	0.998369	0.999966	0.00793106	0.00793106	1.33804	0.343456	1.33804	0.961602	1.01437	0.343456	MEAAADEQGAVVVVAPPALPLTVRLQLAGLTAAIDAVERADGTVSRCLYSVVDRLLSARARTASGVRSHDVDLDASRNIWARVFSPAAANAHPPSAPLPVVVYFHGGGFALFSPAIGPFNGVCRRLCSVLGAVVVSVNYRLAPEHKFPAAYDDGVDALRFLDAHDGTIPGLTSMAVDLGSCFLAGESAGGNIVHHVANIWASQHQRTSRHVRLAGIFPVQPYFGGEERTPSEVRLEGIAPVVNLRRSDWSWKAFLPAGATRDHPAAHVTDDNAGLAEEGFPPVMVVVGGFDPLQDWQRRYADVLRRKGKRVTVAEYPDGFHGFYGFPELDDAWKVLEDMKAFVESNRAVAPPAKLPDAER	4595.99	7675.02	5807.09	8136.59	6553.67	10594.5	10485.8	8439.34	5556.63	8769.08	5193.61	5785.95	6184.03	8044.51	6302.03	4332.7	8075.79	5849.03	8333.81	6647.83	2484.54	2972.8	1741.11	1805.15	2250.9
Bradi1g19730.1	0.00203763	0.00393471	0.284439	0.00632475	0.756003	0.999951	0.00632475	1.63197	0.843552	1.28926	1.63197	0.843552	0.985287	MAREELRARVRAALPWTVRLQLRALEAAVDATQRRRDGTVNRFLFNLLADRRVAPTTTSGSVRSLDVTVDASTGVTARVFFNSGAPTAPSPRPVVVYFHGGGFTVFSAATGPYDSLCRSICLGSGAVVVSLSYRLAPEHRFPAAYDDGAAALRFLTTSSAASQIPVPIDLSRCFLAGDSAGANIAHHVAHRFTSSSSSPPPNIQIAGIILLSAYFGGQERTESELALEGVAPIVNLRRSDFWWKAFLPAGADRNHPAAHVTGEAGPEPELGEAFPPALVVVGGLDPLQDWGRRYAAMLRRMGKSVKVVEFPEAVHAFYFFPALPESARLVEEIKAFVQQDAEPNSNSS	514562	633597	998402	1.08183e+06	807097	1.0051e+06	1.34691e+06	877281	932945	1.04056e+06	1.11905e+06	1.36833e+06	1.22187e+06	1.55939e+06	1.31716e+06	725370	726265	619372	652308	680829	667936	787887	1.00172e+06	723346	795222
Bradi1g19750.1	0.00388909	0.00691223	0.78353	0.999418	0.036595	0.0391995	0.036595	1.13808	0.553138	1.13808	0.974568	0.553138	0.559049	MEASKTKESQGAAADDEIQPRPAAASPPALPWTVRLQVLALVTATDLSQRRDGTVNRFLFSLGDRQTPARARPDALGVRSADVTVDASRNLWARVYSRSSSGSSAVPVPVVVYFHGGGFAFLSAASTPLDGMCRRLCRELGAVVVSVNYRLAPEHKFPAAYDDGEAVFRHLAANNDIFPVPVDLSRCFLAGDSAGGNIAHHVAHRWTSDAEPDPVVFRLAGIILLQPYFGGEERTAAELSLEGVAPVVNMRRSDWSWKAFLPVGADRNHPAAHVTGEAAPEPELGENFPPAMVAVGGLDPLQDWQRRYAAMLRRKGKAVRVVEFPEAIHAFYCFPELPDSGKLVEDVKAFIDRNGGTRVL	18433.7	25738.8	38538.8	44978.7	31922.5	41207.7	40348.8	27567.1	36197.8	36330.3	24135.6	34068.2	34666.1	31572.7	31110.7	21560.5	19991.4	16604.5	12473.7	17657.5	11971.8	19479.6	22544.7	17388.9	17846.3
Bradi1g20050.1	0.000172442	0.000458363	0.998525	0.110444	0.987967	0.0001216	0.0001216	3.73568	1.10047	1.10047	2.10592	1.17463	3.73568	MEPGRSSQPTGTIAFASVGVTSFGFDVFSVAVPQSPETTTAEELAERCHTDGVSVNFNAQFTDDEAGEEEEVAFVSERTGSAALFLCRPGGRATPLPAVEESLFHDRPTLRRGRLYFVSAHEKPPGAPFRSWAALYATDLESQETSRVTPEGVVDMSPAVSPSGELVAVASYGDRPWAFEFRGALDTDVAVFRAAEPARRVVVSAARGAGWPAWHGESAVLFNRVAPDGWWSVFRVDLDPETLSPSPAAETRVTPPGVHCFTPTASGNNNHRWIAVATRRKGHSHRQIELFDLDTSQFTPITTFLNPKIHHYNPFFSPSGNRLGYHRFRGHGAPGESKIPYLNPVRTPVSSLRMLRVHGSFPSFSPDAKHLALNGDFFKSPGVTVLKSDGSRRWVVADQ…	2013.98	1734.83	1561.35	1601.68	1727.96	2771.96	1844.48	1584.68	1405.15	1901.57	3562.85	3315.25	2643.15	5034.53	3638.95	3195.89	2437.07	1189.43	1296.48	2029.72	7974.27	3562.05	8152.54	6131.61	6455.12
Bradi1g20080.1	0.193268	0.216006	0.99607	0.513511	0.956307	0.587626	0.513511	1.07483	0.93173	1.0154	1.07483	0.970095	0.93173	MAASDVPMSPELEQVDGEIQDIFRALQNGFQKIDKIKDSNRQSKQLEELTGKMRECKRLIKEFDRVLKVEEKKSTSEVNKQLNDKKQFMIKELNSYVTLRKTYQSSLGNKRIELFDTGNDDQLAGVNVQMASEMSNQQLIDSGMKQMDETDQALERSKMVVKQTVEVGAQTAATLTQQTDQIKRIGNELDSVHFSLKKASQMVKEIGRQVATDKCIMAFLFLIVCGVIAIIVVKVVNPHNKNIPDIPGLAPPAQNRKLLSIEAYRML	235849	244729	304164	265100	262461	269537	277397	247204	271870	266502	264222	313800	272731	277654	282102	242695	273816	241898	260037	254612	245748	216195	266655	249572	244542
Bradi1g20170.1	0.884174	0.888124	0.94785	0.783829	0.754093	0.948864	0.754093	1.14239	1.08295	1.08344	1.13518	1.14239	1.08295	MENFSPSTLLNSISHLSVLTSDGSTARPKPIQKYCQNVCDISSIVSPLIEEICKSPDEQLNEVLRDLDTAINEASGLIGNWQQTTSKIYFVWQIESVISDIQGCSLQLCQLANSLLPSLTGCACICIEKLQDINYEHMFDLVKEVAIELTMGTQSHENLLKVSVALSLSTNLELYMEAVSLENLKARAIRSENREELDLVEQMIPMVNYMHERLLRETKLLSNYPVSVPGDFCCPLSLELMSDPVIVASGQTYERVYIKLWLDEGFTICPKTRQRLSHSNLIPNYTVKALIANWCELNDIKLPDPVKSLKLNFPSAASSTQDLSATGNSPLHPSVARGNNIPGSPETEIYMRSLNRASPPSVVHQNFDASVNRPGHETSTNQSSEYTNGSADIARLSLA…	36616.6	26684.3	28334.5	27724.7	29840	26029.1	39330.9	32088.4	31870.7	32329.8	29938.4	36277.6	35737.9	33541.3	33873.8	17482.7	35801.8	39448.4	43623.2	34089	34111.2	36333.1	29821.4	28995.5	32315.3
Bradi1g20370.1	0.120737	0.141262	0.953199	0.0827367	0.949407	0.210471	0.0827367	0.932415	0.688886	0.932415	0.688886	0.930795	0.756389	MSYATSLNLGRFSCRTTLLKIGVWGSGTRMLCRRFQGCSLLLLLLVILSNASGSLSSEAEEAETGKRRSLAAGAGGLFCVAIQSADPAALQRGLNYACGPGRADCSAIQPGGVCYKQNNLPALASYAYNDYYHRNAATGATCSFDGTATTTPTDPSSGQCIFAGSSMAGGSNSTTPAASAPSALVPPSSTFTPGIGGGPGSAFTPYDAADSAMAAARRALLLMIPLVVFLFS	25923.2	18788.1	18619.9	13283.5	19153.7	23693.1	16715.7	15446.4	15581.5	17859.2	12782.1	12108.6	13237.6	14650.5	13194.7	21684	18798.4	15498.4	15331.8	17828.1	16500.6	11016.9	14467.9	15965.1	14487.6
Bradi1g20390.1	6.75141e-05	0.000207055	0.0162479	0.0122644	0.0842335	0.564889	0.0122644	1.26282	0.7243	1.26282	0.7243	0.804802	0.902041	MSGAEEAAGSGSGSGSGAGGSGGGGGEARRRFDDKGLVARTSLILWHTHQNDAAAVRKLLEEDGALVNARDYDSRTPLHVAALHGWQEVAECLVANGADVNAQDRWQNTPLADAEGAKKHAMIDLLKKHGGLTYGKTGSHFEAKTIPPPLTNKADWEINPLELDFTKAIIIGKGSFGEILKANWRGTPIAVKRILPSLSDDRLVIQDFKHEVNLLIKLRHPNIVQFLGAVTETKPLMLITEFLRGGDLHQYLKEKGSLSPVTAVNFALDIARGMAYLHNEPNVIIHRDLKPRNILLVNTAANHLKVGDFGLSKIIKSQHANDVYKMTGETGSYRYMAPEVFKHRKYDRKVDIFSFAMILYEMLEGDPPFSNYEPYEAAKYVADGHRPAFRSKGHISELK…	174844	202017	215518	249965	210586	232529	265444	279179	286575	265932	158345	158470	170768	122527	152527	194870	142868	165649	174532	169480	183036	210672	199471	166650	189957
Bradi1g20670.1	0.32497	0.349032	0.552044	0.815408	0.287557	0.175616	0.175616	0.731707	0.351026	0.601438	0.731707	0.448697	0.351026	MASSLFVMVVLALASAAHAQVQPPAASPSGPDCGSTLVGLAGCLPYLTPGSTVSKPPKECCGPVKSSLASPASAACLCDAFGKNYGVPIDLARAAGLAAACGGNQAALSKCKIAIPGAPGSAPTEAPSPSSGSTPATGSPGPAKAAATRSPVSLVTLVLSVVAAPLLSHYL	60884	19738.9	20909	8114.17	27411.5	24014.8	17206.7	6524.5	18199.4	16486.3	17632.7	7752.26	26018.6	28825.3	20057.2	13794.5	5752.7	23911.7	5738.88	12299.5	15452.2	7268.71	9268.97	6498.69	9622.14
Bradi1g20880.1	1.94517e-06	1.29263e-05	0.073387	0.00056275	6.65795e-07	4.56631e-07	4.56631e-07	0.793931	0.324167	0.793931	0.585047	0.365304	0.324167	MAASEGGAPALTQQQQDIQMMLAADVHLGTKNCDFQMERYVFKRRTDGIYIINLGKTWEKLVMAARVIVAIENPQDIIVQSARPYGQRAVLKFAQYTGANAIAGRHTPGTFTNQMQTSFSEPRLLILTDPRTDHQPIKEAALGNIPTIAFCDTDSPMRYVDIGIPANNKGKQSIGCLFWLLARMVLQMRGTILPGHKWDIMVDLFFYRDPEEAKELEEEEALVAPDYGAVAEYAAPTADTWGGEWPGAAAPPAAAVAEAGADWTGAAAPAADAGWDAVAAPPPAATGWEQGNAPAPAAATPNWE	66139.2	81584.7	83120.5	68723.9	74892.1	63427.3	62615.8	45497.7	66295.5	59459.1	37006.8	54093.4	31941.8	52219.7	43815.4	36821.7	33910	19722.5	18979.2	27358.3	25900.1	23417.2	24156.2	23636.6	24277.5
Bradi1g20995.1	0.0315127	0.0429401	0.0503384	0.0706291	0.0285597	0.0155716	0.0155716	0.654935	0.549726	0.630624	0.654935	0.590676	0.549726	MAAALARAMSTSAAIAPPVSLDTINPKVLEFKYAVRGEIVTHAQYGVSLFRNLNHGLALPLQNLENELQKHPESLPFDEILYCNIGNPQSLGQHPVTFFREVLSLCDHPALLDKSETHALYSSDAIERAWQILDKIPGRATGAYSHSQGIKGLRDEIAAGIAARDGFHASGDNIFLTDGASPAVHMMMQLLIRSEKDGILCPLPQYPLYSASITLHGGSFVPYFLDEETGWGLEVEELKKQVDEARSKGITVRALVVINPGNPTGQVLAEENQKKIVEFCKNEGLVLLADEVYQENIYVEDKQFHSFKKIARSMGYTDDDLPLVSFQSVSKGYYGECGKRGGYMEVTGFSADVREQIYKVASVNLCSNIGGQILSSLVMNPPKAGDESYESFMVEKDGI…	3989.25	4918.71	2851.84	2107.64	3466.86	2639.67	2036.33	1685.95	2383.19	2186.29	1888.27	2522.02	2469.02	2202.97	2270.57	1431.27	1617.64	2455.13	2687.12	2047.79	1965.74	2141.78	1781.79	1734	1905.83
Bradi1g21060.1	2.74931e-08	4.75489e-07	0.999856	0.999268	0.040346	1.83696e-09	1.83696e-09	15.1695	0.776186	0.851831	0.776186	4.64004	15.1695	METPPPFQESAHCDVCRCTFSTFRRRHHCRNCGRTLCHEHSSYHMALPQYGIYTDVRVCYECFSKSSRRGGVRNESSPVSVSSVSDSLSGLNLDKDDASSPTKYSAAQSSAAIVECKCGMPLCICEAPKPEPAPVKQNISTTSSTVQSNTRPKKSTSNQQSADPSAKKASATSSSNSSSFLNLGLMSSDSNDKNLSDYDVTGEGLREAIKSGDINAVKKLLSEGVDCNYCDKQGFTLLHLAALFNQTEIALILMDSGANIQRKNGQGETPLDCAPPMLQYKMRQRMEELAASRRPE	9853.68	14135	12158.6	10718.6	11716.5	10996.5	8225.82	6559.41	14140	9980.45	9384.36	5951.48	9604.13	11436.6	9094.15	54026.4	42405.6	56729.7	64297.6	54364.8	124819	159590	233395	193128	177733
Bradi1g21260.1	3.01707e-06	1.7851e-05	0.330965	0.00383448	1.01091e-06	5.73858e-06	1.01091e-06	0.849476	0.287411	0.849476	0.627623	0.287411	0.333887	MDSKPATAPSAAPSAEKEGSAYPRMSPEDLAPPPPPVVLPASANPYVLSSASSSQPPAKSTRENLREMFGQVGKMFGEAARKTEGIAGDVWQHLKTGPSITDAAMGRIAQISKVISEGGYDKIFQQTFECLPDEKLKKAYACYLSTSHGPIMGVLYVSTAKLAFCSDSTVAYVTEDNKTASAIYKVVIPVPHLRSVTPTASQQNPAERYIQVVSVDNHEFWFMGFVNYDSAVKCLQDAVRGSG	22191	31807.7	39033.7	25837.5	29717.5	26139.4	25027.4	23197.8	26612.5	25244.3	14334.6	19877.4	20663.1	19730.3	18651.4	12399.1	8988.67	5646.91	7129.84	8541.13	10402.1	8285.55	11142.7	9858.78	9922.28
Bradi1g21310.1	1.3621e-06	9.6203e-06	0.0337667	6.85293e-07	0.0482238	4.59657e-05	6.85293e-07	2.9351	1.56703	1.60514	2.9351	1.56703	2.26935	MERYEVIKDLGSGNFGVAKLVRDVRTKELFAVKFIERGHKIDENVQREIMNHRSLRHPNIVRFKETYAKMSWLKLHPQVVLTPTHLAIVMEYAAGGELFERICSTGRFSENEARFFFQQLLSGVSYCHSMQICHRDLKLENTLLDGSEAPRLKICDFGYSKSSVLHSQPKSTVGTPAYIAPEVLSRREYDGKVADVWSCGVTLYVMLVGAYPFEDPVEPKNFRKTITRILSVQYAVPDYVRISMECRHLLSRIFVANPEQRITIPEIKNHPWFLKNLPIEMTDEYQLRLQMVGINAPSQTLEDSMAIIQEARKPGDGSKFAGQLCVPGLGSMELDDIDADDIDVEDSGDFVCAL	2508.54	3166.45	2869.76	2675.96	2805.18	4683.37	4492.55	4158.46	4676.39	4502.69	9394.53	7750.46	6603.54	9185.43	8233.49	5221.78	4722.58	4029.01	3609.85	4395.8	5556.33	7313.88	7127.94	5465.51	6365.92
Bradi1g21550.1	2.01525e-06	1.32512e-05	0.000794651	6.3708e-06	4.7744e-07	4.36898e-07	4.36898e-07	0.731518	0.527099	0.731518	0.583645	0.527099	0.541029	MAASFSNVNSEAGLKKLNDYLLSRSYISGYQASKDDMGVYSAFSVAPPSKYTNVVRWYNHIDALLKLSGVTAPGQGVKVESSVVPEVSTPDVSEAPAADDDDDDDVDLFGEETEEEKKAAEERAAKVKASGKKKESGKSSVLLDVKPWDDETDMAKLEEAVRSVKMEGLLWGASKLMPVGYGIKKLQIMMTIIDDLVSVDTLIEDHLCVEPANEYIQSCDIVAFNKI	167681	227583	191786	172852	189975	141794	135352	132129	146606	138970	107521	109206	109168	117617	110878	96049	115324	99570.1	89600	100136	96868.5	83873.4	118423	111965	102782
Bradi1g21630.1	5.61566e-07	4.8561e-06	0.025299	9.10801e-06	8.91279e-08	1.33902e-06	8.91279e-08	0.717086	0.179467	0.717086	0.325899	0.179467	0.228729	MTTRFKKNRKKRGHVSAGHGRIGKHRKHPGGRGNAGGMHHHRILFDKYHPGYFGKVGMRYFHKLRNRFYCPSVNVERLWSMVPAEKAAEAGGDKAPVVDVSQFGYFKVLGKGLLPEKPIVVKAKLISKVAEKKIKAAGGAVVLVA	26277	37144.8	38324.5	29419.5	32791.5	17266.6	28200.5	24810.2	23779.8	23514.3	12065.8	13795.3	5480.14	11405.5	10686.7	9509.52	7584.32	3998.64	2447.41	5884.97	12052.5	4654.64	4964.76	8329.47	7500.35
Bradi1g22500.1	9.44849e-06	4.1518e-05	0.0268572	4.30148e-05	8.66315e-07	7.4677e-05	8.66315e-07	0.797251	0.477214	0.797251	0.594007	0.477214	0.605619	MEDAVVSAGGGAINVLLCKLGTVLIQEAQLLGGIRGELQYMKDELESMTAFLQDLAERENHRKQLKIWMKQVREVAYDVEDCVDEFTHHLGSSTSGSGLPEFVHRCIRFIQTARVRRQIAKQIQELKVRATSISDRNSRYGGNHIISEGNTFAAQPALSTVISLDVRTPALFPEITKLVGIEARQKNLVNWLVDESVEQLLVISISGFGGLGKTTLAMTTYQTASASFQCRAFVTVSQKFDVRTLIKDILRQIVQPVDQNDPAPAEDPLKGIEEWDVGQLASILRGHLEDKRYLIVLDDIWTISAWEGIRFALPNSTGSRIMVTTRIKTVVQACCLHQHDRAYEIEPLTGSESSELFFTRLFGNRDNCPTVLEEISEKILGKCGGIPLAIVSITGLLAS…	20719.7	23438.9	29442.6	21757.8	23839.8	17716.6	20351.4	17622.8	20334.3	19006.3	14341	15228.7	13044.7	14029.6	14161	13563.3	11601.6	10998.6	9343.19	11376.7	14820.6	11943.5	16626.6	14360.6	14437.8
Bradi1g22660.1	0.0369874	0.0495491	0.0854135	0.993412	0.94255	0.882152	0.0854135	1.6612	0.806049	1.6612	0.916393	0.84614	0.806049	MASPEPEVFDVVIFGASGFTGKYVIREALKFLPPNASPIRTLALAGRSRDRVAAALRWAAAPGPAPDVPILVADAADPASLAALASRARVLLSCAGPFRLHGHQVARACAAAGADCLDISGEPEFMERVEADLHEEAAKNGSLVISACGFDSIPAELGFLFHSRQWAPPSAPASVVAHVSLESDKKIVGNFGTFESAVLGVANASHLQALRRTRPRPPKPNIPGPPPPKGSLIEHDKSLGLWVMKLPSADTVVVKRTLSKMTEHPEGLPGVEETPDFAERRKEFWASVKPAHFGVKIGTRSLLGVLRFLCTGVFIGILGGFSFGRSLLLKFPEFFSLGWFRKTGPTEEEVSSASFKMWFVGRGYSDAAHAASQRGSKPDKEVVTRVSGPEIGYITTPIV…	28041.5	60347.9	95396.4	64036	61955.5	98229	106833	99132.1	107487	102920	67161.6	63854.8	66758.7	29327.1	56775.6	49462.8	24855.4	60751	74622.7	52423	83525	77137.8	24056.4	15037.4	49939.2
Bradi1g22860.1	2.32932e-06	1.48219e-05	0.999978	0.999963	0.0306992	2.26309e-06	2.26309e-06	19.0264	0.811363	0.833858	0.811363	7.83991	19.0264	MLRAMHLAFRRENSSRATSLRGLAGHFSTASTNNCQRLAGKVALITGAASGIGKATAIEFVRNGAKVILADIQDAPGRALAASLGADAAEYTRCDVTDEAQIAAAVDLAVSRHGRLDVLYSNAGISSGTGPAPLAELDLADFDRVMAANARSAVAAFKHAARVMAAPRGAGGCVLCTGSTTGMMGGVAALPYSLSKAAVVAAVRLAAAELARAGVRVNSISPHAIATPMVVAALARANPGVGEEELKGMVERGIGIGMGGGGIRGAVLEVEDVARAAVYLASDEAKYVTGHNLVVDGGFTVGKPINLSAAT	240.973	366.378	613.827	778.942	500.03	653.244	178.474	545.151	290.947	416.954	482.936	459.597	161.042	519.248	405.706	4623.8	2088.1	2910.56	6058.29	3920.19	5478.36	8732.65	11161.3	12682.8	9513.78
Bradi1g22980.1	0.00480282	0.00827593	0.462945	0.019314	0.0203524	0.00193336	0.00193336	0.785941	0.336334	0.785941	0.506073	0.509891	0.336334	MGTRGGFVIAVVLRELLSSAAAAADDGSLRRRSLHQPFFPIEWSPPPPASGSVVLPTPPPASAAAASTTSPARSAPSFTNTIAIALTAGLVALAVVSYSCVLLWRRVSDGGGEDDGRATTATSTKPVAVGAVPARVPSDVGSSSRRHRSPPPSSTASDAIYLDPLTSLMEVHQHRASPDLRPLQLPKQPSLSPDLRPLPPLKRPVSHPPPPPASTPPMTATTEYSSEEDDQATYYTARKTAMSSFSRSTSQRSTLEQTAPPPAPAPVPPPPPPQVNHLRPPRPPPPPPLPRQRLLRPLPSESPPPAALANLALTSPPEPSIQNRGIENSDVLGGSTRPPNLKPLHWDKLRAISGRTTVWDQVKNSDSFRVDEAAMESLFPRSGVPAAGNSDQAVARGAP…	7709.11	5572.64	4188.23	2737.35	5051.83	2966.27	3911.85	4144.01	4859.64	3970.44	3226.01	1922.71	2177.52	2900.13	2556.59	2165.5	3290.2	2524.57	2323.26	2575.88	2503.05	1707.44	1377.83	1208.1	1699.1
Bradi1g23250.1	0.718699	0.728966	0.998453	0.563278	0.99992	0.894038	0.563278	1.17008	1.01376	1.02921	1.17008	1.01376	1.0954	MKGLFKSKPRTPPDVVRQTRELLIFLDLHSGSRVADAKREEKMAELSKNIRELKCILYGNGEQEPVTEACVQLTQEFFKENTLRLLIVCIPKLNLETRKDATQVVANLQRQQVSSRIVASEYLESNKDLLDTLISGYENMDIALHYGAMLRECIRHQSIARYVLESDHMKKFFDYIQLPNFDIASDASATFKELLTRHKATVAEFLSKNYDWFFAEFNTRLLSSTNYITKRQAIKLLGDMLLDRSNSAVMMRYVGSKDNLMILMNLLRDTSKNIQMEAFHVFKLFAANKNKPADVVNILVTNRSKLLRFFAGFKTDKEDEQFEADKEQVIKEISAL	67665.8	56599.6	97985.9	101430	80920.3	64910.3	99118.3	76812.6	92293.9	83283.8	94475.4	116854	79445.1	87957.3	94682.9	90468.2	77714.3	80458.9	79492.4	82033.5	69514.3	88338.3	106519	90189.7	88640.3
Bradi1g23450.1	3.38806e-05	0.000119023	0.999997	0.636411	0.00161117	0.00113001	0.00113001	3.54999	0.384193	0.976945	0.384193	3.52545	3.54999	MASDALTEAGQPKKKGNVRFAFACAILASMTSILLGYDIGVMSGASLFIKKDLQISDVQVEVLMGILNVYSLIGSFAAGRTSDWIGRRYTIVFAAVIFFAGALVMGFSVNYLMLMFGRFVAGIGVGYALMIAPVYTAEVSPASARGFLTSFPEVFINFGILLGYVSNYAFSRLSLRLGWRVMLGIGAAPSVLLAFMVLGMPESPRWLVMKGRLADAKVVLAKTSDTPEEAAERLADIKDAAGIPQDLDGDIVEVPKKGGSEEKRVWKELILSPTSAMRHILISGIGIHFFQQASGIDAVVLYSPRVFKSAGITNENRLLGTTCAVGVTKTVFILVATFLLDRVGRRPLLLSSTGGMIVSLVGLAAGLTVVSRHPDEQIPWAIALCILCILAYVAFFSIG…	323638	91096.7	51778.1	85592.3	138026	197266	107137	150682	84290.3	134844	69627.6	44109.8	43886.7	54490.8	53028.7	677463	571687	374881	322384	486604	643289	397869	438540	480267	489992
Bradi1g23520.1	2.02659e-08	3.87754e-07	1.08881e-05	3.04419e-07	1.44232e-10	1.59461e-12	1.59461e-12	0.651499	0.373002	0.651499	0.557986	0.416168	0.373002	MAAASTTDGGVGAILTAGERDYLVRNSGEQVKISSIEAGTVALYFSASWCPPCRRFTPKLIEAYKELASQGKSFEVVFVSGDQDEEAFNAYFAKMPWLAVPFTDSEGRKSLDERFQVRGIPHLVILDAKTGKVCTEDGVEFVSEYGIDAYPFTPERINELKEQEKAAKDNQTIHSVLSAPTRDYLISNKGDKVPISDLEGKYVGLCFVVSGYGPVEEFTTVLAKIYGKLKEVGKKFEVVAVSMDNDEASFNESFQNMPWLAIPQGDKMCQKLVSYFELNDLPTLVLIGPDGKTLNSNIADIIEENGVESWEGFPFNAEKLEILAEKARAKAESQTLQSLLVTGDLDFVIGKDGAKVPVSQLVGKTVLLYFSAQWCGPCRAFLPTLVDVYNKIKEKNSDF…	369815	384627	436184	364316	388736	300572	269543	201158	241770	253261	231243	207190	198962	230241	216909	167462	180547	142102	157005	161779	150922	121487	172618	134970	144999
Bradi1g23600.1	0.000760607	0.00166864	0.98585	0.198447	0.00159408	0.0026731	0.00159408	0.937977	0.267954	0.937977	0.679541	0.267954	0.312064	MAASSRRASQLLGSAASRLIHARGYAAAPSPAVFVDKSTRVICQGITGKNGTFHTEQAIEYGTNMVGGVTPKKGGTEHLGLPVFNSVAEAKAETKANASVIYVPPPFAAAAIMEAMEAELDLVVCITEGIPQHDMVKVKAALNRQSKTRLIGPNCPGIIKPGECKIGIMPGYIHKPGRIGIVSRSGTLTYEAVFQTTAVGLGQSTCVGMGGDPFNGTNFVDCLEKFVADPQTEGIVVIGEIGGTAEEDAAAFIQESKTEKPVVAFIAGLTAPPGRRMGHAGAIVSGGKGTAQDKIKALRDAGVTVVESPAKIGSTMFELFKQRGMVE	4043.47	7870.35	5497.84	3130.94	5135.65	4575	4498.55	4480.59	5714.35	4817.12	2441.2	2650.54	4908.54	3959.26	3489.89	1983.59	393.718	1788	1339.17	1376.12	1389.68	2657.39	883.126	1480.42	1602.65
Bradi1g23640.1	2.18027e-05	8.10664e-05	0.661597	0.304522	0.000207239	0.000987692	0.000207239	1.08184	0.583557	1.08184	0.872293	0.583557	0.641811	MLGRRRNNMLPKRLEGVLLLLFMLMVSNASGAFVGVHVGTGVSDLPSPSDIVSILKAKRIQHVRLVDSDHKMLVALANTGIEVMVGVPNDQLLRVGQSRSTAADWINKNVAAYIPATNITYIAVGDEVLTTIPNAALVLVPALQFLQSALLAANLNTQVKISSPHSMDMISKAFPPSTATFNSTWSSIMSQYLQFLNNTGSSFMLNAQPYYGYVKGQGVFPLEYALFRSLNPNSKIADPNSNLFYTNMFDAMVDAAYNSMQAMNFTGIPVMVTASGWPWRGARNEPAADVDNALAYNTNLIRHVLNSSGTPSQPKNQVSTYLFELFSEDRRTGPVSEQNWGIMFTNASAVYSLAFEDVAANNTDSPALRGMFCVANSSASHSALKQSLDWACGPGSANC…	131471	165700	149670	145059	147975	142312	159092	171218	167721	160086	121894	116239	161089	117089	129078	64652.1	81178.4	95615.3	103962	86351.9	108165	98663.8	91444.8	81614.4	94972.1
Bradi1g23770.1	0.223161	0.246555	0.868611	0.834616	0.996933	0.322424	0.322424	1.31041	0.860251	0.860251	1.1517	1.04747	1.31041	MREIISIHIGQAGIQVGNACWELYCLEHGIQQDGTMPSDSTVGVAHDAFNTFFSETGAGKHVPRAIFVDLEPTVIDEVRTGAYRQLFHPEQLISGKEDAANNFARGHYTVGKEIVDLCLDRVRKLADNCTGLQGFLVFNAVGGGTGSGLGSLLLERLSVDYGKKSKLGFTIYPSPQVSTAVVEPYNSVLSTHSLLEHTDVAVLLDNEAIYDICRRSLDIERPTYTNLNRLISQIISSLTTSLRFDGAINVDVTEFQTNLVPYPRIHFMLSSYAPVISAEKAYHEQLSVPEITNAVFEPSSMMAKCDPRHGKYMACCLMYRGDVVPKDVNAAVATIKTKRTVQFVDWCPTGFKCGINYQPPSVVPGGDLAKVQRAVCMISNNTAVAEVFSRIDHKFDLMY…	416640	382395	551871	704350	513814	275711	427650	544897	519779	442009	518958	682846	620271	544968	591761	342841	390234	662949	756798	538206	611653	819502	663667	598399	673305
Bradi1g24120.1	0.159568	0.181499	0.427291	0.0709481	0.960744	0.82711	0.0709481	3.02527	1.40382	2.15709	3.02527	1.40382	1.65354	MGAARRGSAMAVAALVAAAMWAGMAAAASYEVGDKLGWTIMGNPNYGAWANSKKFHVGDTIVATVQNLLETFTCTRLD	7668.4	8026.74	16956.8	14100.4	11688.1	29500.9	53646.1	11319.7	6382.41	25212.3	23151.3	27079.8	37131.2	54075.9	35359.6	15803.4	10059.2	29063.6	10705.5	16407.9	34198.2	9725.42	12681.4	20701.7	19326.7
Bradi1g24125.1	0.678575	0.690345	0.764569	0.69573	0.999561	0.997972	0.69573	1.4394	0.934704	1.394	1.4394	0.934704	1.09663	MAVSKADYKNCDVTKPMATWSTGKDSVVLNTTGTHYYLCGYPGHCGMGQKVAVHVSAASSDAPSAAPSMAPAPASSSGSGGSTAGRAAAAAPSPNKNAAPSTVGCSVALTAAASVLSVAAAGLNLL	6387.36	4993.21	6552.74	3489.45	5355.69	8672.63	15262.2	2930.2	2998.25	7465.83	7106.13	6035.91	9602.53	8091.32	7708.97	6447.06	4471.16	8159.75	945.956	5005.98	8023.51	5212.66	6790.07	3466.54	5873.2
Bradi1g24240.1	0.00138467	0.00280469	0.00852339	0.154725	0.728976	0.924333	0.00852339	1.28925	0.921473	1.28925	1.16881	0.921473	0.950412	MGNCCVTAGEGGGSGRKKQPKEPKQKKGKKPNPFSIEYNRSAPPGATKLVVLREPTGRDIAARYELGGELGRGEFGVTYLCTDRATGEALACKSISKKKLRTAVDIEDVRREVEIMRHLPKHPNIVTLRDTYEDDNAVHLVMELCEGGELFDRIVARGHYTERAAAVVTKTIVEVVQMCHKHGVMHRDLKPENFLFANKKETAALKAIDFGLSVFFTPGERFTEIVGSPYYMAPEVLKRNYGQEVDVWSAGVILYILLCGVPPFWAETEQGVAQAIIRSAIDFKRDPWPRVSDNAKDLVRGMLNPDPKRRLTAQQVLDHPWLQNIKKAPNVNLGETVKARLQQFSVMNKFKKHALRVIAEHLSVEEVAGIKDMFEKMDLNKDSMINFDELKLGLNKLGH…	282700	299174	319881	327505	307315	378954	495618	329298	380952	396206	346221	383555	341112	365881	359192	286610	265044	300889	280188	283183	300858	279912	297324	290210	292076
Bradi1g24490.1	0.0740099	0.0918485	0.228814	0.232467	0.987704	0.994259	0.228814	1.94711	0.815266	1.94711	1.94243	0.815266	0.849551	MTQEGAQQAPVNFWGEHPATEAEYYASHGAEGESSYFTPPGASPRRLFTRAWRPAAAGGTPPRALVFMVHGYGNDISWTFQSTAVFLARSGFACFAADLPGHGRSHGLRAFVPALEPAVADLLAFFRSVKQREEHAGLPCFLFGESMGGAICLLIHLRTPPGEWTGAVLVAPMCRISDRIRPPWPLPQILTLVARFAPTLPIVPTADLIEKSVKVPAKRLVSARNPMRYNGRPRLGTVTELLRATDELGARLGEVSVPFLVVHGSADEVTDPAVSRALYEAAASKDKTLKMYDGMLHSMLFGEPDENIERVRGDILAWLNERCTPAATS	10169.2	10218	20538.6	47557.9	22120.9	34071.7	71288.2	39676.6	27250.9	43071.8	21275	67766.5	42375.9	40456.1	42968.4	34099.8	11737	16690.7	9610.34	18034.5	24956.3	27290.3	11916.5	11008.3	18792.9
Bradi1g24567.1	0.0589794	0.0751305	0.999784	1	0.986851	0.0512184	0.0512184	1.30266	0.985722	0.985722	0.999692	1.0415	1.30266	MDVRVVMRKSVRSMPVTSLPLIAHAAVLLLLSALPLSQTLTYDQDVFAINGLYTALGSPALPGWVANGGDPCTENWQGVTCVMTNITNIKLTGISLAGQLGNTLANFTSLISLDLSNNNIAGTIPDNLPVTVQQLFLSGNKLSGSIPSTLSTLTLLTAMSLNSNQLAGDIPDVFSSHTGLANLDFSANNLTGPLPPSMGNLTALTSLHIQNNQISGTLNVLQDLPLQDLNIENNLFSGPVPPKLLSIPSFQKDGNPFNTSIAPSPSPLPGAPGPLPSLPPSTGHVPSKEPTKSSGVPNGNSPTSGANTVRTAKFVGYILVGVVSAVIIVLMVMFCSSKYKERKSKNNVYTKSQIGREPQRLGEPKIKEVSDIKEHLVKPANTVGKASNTVSNSKEELKV…	2198.65	2496.77	2019.65	1651.91	2091.74	2024.84	2086.11	2259.08	1877.47	2061.88	2124.15	1863.44	2041.2	2335.59	2091.1	1927.81	1711.39	2790.95	2284.06	2178.55	3098.44	2791.22	2788.53	2221.15	2724.83
Bradi1g24850.1	0.00114014	0.00236259	0.154731	0.0609458	0.0994851	0.996156	0.0609458	1.22494	0.798008	1.18065	1.22494	0.798008	0.97704	MAISGDDRYAPAGDSGSVKLWNLCRMPFRQAGGAPASSSGIHQSASRYGHEAPVAADGSAPGASAGISTMAKALLPARRRLRLDPPNKLYFPYEPGKQVKSAIRIKNTSKSHVAFKFQTTAPKSCFMRPPGAILAPGETVIATVFKFVEHPENNENVLQKCKVKFKILSLKVKEPMDYAPELFDEQKDQAVVEKLLRVIFLDVQNPGPQLEKLNTQLAEAEAALEARKKPPEESGPRIVGEGLVIDEWKERRERYLAQQQVEVVDSV	86437.1	74898.9	101412	112627	93843.6	108868	131666	96023.5	106627	110796	105790	114985	110916	128119	114953	75904	75798.3	71166	76683.3	74887.9	96699.2	82289.7	97524.9	90242.2	91689
Bradi1g24960.1	0.494325	0.516134	0.99163	0.322598	0.565752	0.890723	0.322598	1.16037	1.03198	1.03198	1.16037	1.11927	1.06779	MGLEIAGAESPAVKGKFWGILVCWFLGNGSLFAWNSMLTIEDYYVSLFPNYHPTRVLTLVYQPFAFGITCILTYHEAKLNTRRRNLLGFALFFLSSFALILLDVGTKGRGGIAVYIGVCIISAFFGTSDALVQGGLVGDLSLMCPEFIQSYLAGLAASGVLTSVLRLITKAAFENSQNGLRNGAMLFFSITCIFELVCLVLYAYVFPKLPIVKYYRAKAASEGSKTVGSDLAAAGLKTDQDRQVEEDPQKHERYSTKQLLMQNIDYALDIFLIYILTLSIFPGFLSEDTGTHGLGTWYVLVLIVMYNGLDLIGRYVPLIKCLKLTNRKGLMAAILARFLFIPAFYFTAKYGDQGYMIFLTSFLGLTNGYLTVCVLTDAPSGYKGPEQNALGNVLVVCLL…	45800.5	35564.3	41140.2	32509	38753.5	41826.2	41494.4	40635.4	36015.5	39992.9	45182.5	42384.5	44925.8	47381.3	44968.6	43918.1	44587.8	49276.8	35719.2	43375.5	53235.4	35983.4	37690.2	38613.6	41380.7
Bradi1g25090.1	0.557894	0.576262	0.409412	0.568918	0.444103	0.474271	0.409412	0.791215	0.74666	0.74666	0.791215	0.756989	0.765652	MAPFFFLLLLGQILLCTAVDTINSTTPFSGTQRIVSRGSKFTLGFYSPPLGSSISGSYYIAIWYSNIPQVTTVWTATTDVLVSDPTTASLRIASDGNLVLLDQAKNRQLWSTNVSTISNSTMATIKDTGSLELTDASNPSIVYWRSIDHPTNTWLPGGKLGLNKTTRVSQRLVPWKNNADPSPGLFSLELDPNGTTQYFIQWDESISYWTSGPWNGNIFSLVPEMTSNFRYNFQFINNDTESYFIYSMKDDSVISRFIIDVTGQIKQLTWVDSSKQWIMFWAQPRTQCEVYALCGAYGSCSLTALPYCNCIKGFSQKFQSDWDLQDYSGGCKRNVPLQCQANSNSAKTQPDKFYTMGGVRLPDNAQSALATSSEECKVACLKNCSCNAYTYNSSGCFVW…	258748	146245	132970	98894.4	159214	164716	117145	79287.8	114367	118879	115885	100706	134234	153065	125973	121137	101186	153598	106173	120524	142825	102264	125117	117406	121903
Bradi1g25180.1	0.00120439	0.00248428	0.751242	0.00134241	0.00321211	0.15028	0.00134241	2.2938	1.26423	1.26423	2.2938	2.15188	1.59401	MAASPALFALLACLCGALAMAVAASDTLKQGESLTVSATLVSSPAGVFEAGFYAPDPKQPARLYLCIWYRGIQPRTVAWVANRANAATGPSPSLTLTAAGELRVLDGAARDDGAPLLWSSNTTTRAAPRGGYSAVILDTGSFQVRDVDGTEIWDSFWHPSDTMLSGMRISVNAQGKGPAERMLFTSWASETDPSPGRYALGLDPVNPNQAYIWRDGNVPVWRSGQWTGLNFVGIPYRPLYVYGYKQGNDQTLGTYFTYTATNTSLQRFVVTPDGKDVCYMVKKATQEWETVWMQPLNECEYYATCGSNAICTVVQDRKAKCTCLKGFQPKSPDQWNAGNRSQGCVRNPPLGCQVNQTGDGFLSIQNVKWPDFSYWVSGVTDEIGCMNSCQQNCSCGAYV…	13322.5	6418.13	16289.4	13007.5	12259.4	13716.6	15893.6	13956.2	18428.3	15498.7	26857.3	22617.5	31136.4	31871	28120.6	22316.3	32143.7	30656.4	20406.3	26380.7	28303.5	20642.7	14230.6	14989.3	19541.5
Bradi1g25220.1	0.000226574	0.000575608	0.0377584	0.00465612	3.23856e-05	0.00774561	3.23856e-05	0.694023	0.303711	0.694023	0.57941	0.303711	0.607323	MDRAELTTEQVLKRDIPWETYMSTKLISSTCLQLLRRYDHKPESERGPLLDEDGPSYVRIFLNILRSISKEETVEYVLALIDEMLAVNPKRAALFYDESLSGEDIYDPFLS	58482.4	100944	115562	84495.8	89870.9	62775.7	63213.2	57115.8	66384.9	62372.4	41676.9	49971	45890.5	70749.9	52072.1	34792.8	26125.7	25905.7	22354.9	27294.8	44203.4	56498.1	68324.4	49296.6	54580.6
Bradi1g25430.2	0.0012476	0.00255777	0.837785	0.725216	0.000523658	0.6674	0.000523658	4.72737	1.59104	1.59104	1.72753	4.72737	1.79243	MAQAMASMTGLTSAQGVRLPGPAGRRGASKLTVRASAEAETAGRRAVLGLMASGVAGGAFAQAVLAAVNPIKVGPPPLPSGGLPGTENSDEARDFALPLKNRFYLQPLPPAAAAARAKESAQDILNLKPLIDKKQWPYVMNDLRLRASYLRYDLKTVISSKATKEEKKDLKDLTGKLFDTLDGLDHAAKIKSPAEAEKYYGETKTVLSDVLAKLG	31586	39983.2	36637.5	27912.5	34029.8	36335.8	45688.1	65823.7	68723.4	54142.8	73139.5	60887.7	53210.4	47911.9	58787.4	220246	232617	104581	86041.1	160871	47605.6	62809.2	62697.4	70872.1	60996.1
Bradi1g25440.1	0.00674489	0.0110423	0.0839906	0.49644	0.00204096	0.0504345	0.00204096	2.67084	1.50643	1.92871	1.50643	2.67084	2.03108	MAGSLLANYVQVNVMLPLDVVSVDNKFEKGDKLRAQLKKLTEAGVDGVMIDVWWGLVEGKGPKAYDWSAYKQVFELVQEAGLKLQAIMSFHQCGGNVGDVVNIPIPQWVRDIGATDPDIFCTNRSGKRNIEYLTLGVDDQPLFHGRTAIQMYTDYMASFRENMKEFLNAGVIVDIEVGLGPAGEMRYPSYPQSQGWVFPGIGEFICYDKYLVADFKAAAAKAGHPEWELPDDAGEYNDTPEKTQFFKDNGTYVTEKGDFFLSWYSNKLIKHGDKILDEANKVFVGYTVQLAIKISGIHWWYRVPNHAAELTAGYYNLDDRDGYRTIARMLKRHHASLNFTCAEMRDSEQSSEAKSAPEELVQQVLSAGWREGLDVACENALGRYDATGYNTILRNARPK…	390833	511661	378795	356808	409524	896123	679091	820612	763593	789855	634716	399290	454840	978824	616917	720995	862150	1.25002e+06	1.54193e+06	1.09377e+06	897599	663447	778191	987862	831775
Bradi1g25530.1	0.00578097	0.00972257	0.103885	0.00204716	0.433734	0.86283	0.00204716	15.9034	3.5897	9.009	15.9034	5.94454	3.5897	MALTCLLIVLLCVSLSLLFVNHAEAGEVGVSYGRIGNNLMDPASVVQLLNQNGITSIRVYDTDEAVLNSMANTGIKILVGLPNELVASAADDPSYALRWVQDNVKRHYPDAKINGVTVGNEVFNQASQLTSKLVPAMKNVQAALARLGLADAIKVTTPIALNALKQSSPPSQGAFRDDIAQSVMSPMLDFLDQTGSYLMVNIYPYYTYKDQQGDFSLAYATSGQNDGVLDSGTGVRYYSLFDAQLAAVHYANRRRGHPRVHVVVGETGWCSYCNNAVASKENAASYVNNVIRSTHSSSGGSAGTMGSNRTLAVGAAGAGTNGDFSVYIFALFNENQKPADEQNFGLFYPNGQAVYQVDFRGGGGGGGGGGTASWCVARSDVGDARLQAALDYACGHGAD…	0	166.432	1709.16	4105.47	1495.27	17147	14073.3	11404.9	11258.2	13470.9	34452.2	38732.8	12446.5	9487.71	23779.8	3264.41	12484.7	10200	9605.66	8888.67	1141.29	9579.52	4096.98	6652.42	5367.55
Bradi1g25647.1	0.000137618	0.000375802	0.958449	0.999996	0.000788033	0.0016475	0.000788033	0.99553	0.553781	0.952071	0.99553	0.553781	0.580746	MASHHQHHHLPSHLAPAAALLLAFLLAPPAAALTPLCGKNSNYTANSTYQANIRALSLTLPKSANSSRTLFATGRVGALPDIVYALALCRGDTSASACGACVATAFQDAQQLCAYDRDASVFYDPCFLRFSDQNFVSDTSGDNGNSIALMNTQNVTAPVKLFDDAVGVLLNATADYAAANSSRRFGTGEAGFETVDKGYPKIYGLAQCRPDMASADCRSCLANIIRDMPKFFSGKQGGRIIGIQCFYRYEQYPFFFGPSLLQLPAPSLGAAPEPAPANATPPETGGGGTTNSAGRILAIALPIAAAIMAAVMFCLCLWMRKRKPARKQSLAYPTNPEDIQTIDSLILDLSTLRVATDNFDESNKLGEGGFGAVYKGVLAGDEEIAVKRLSQSSRQGIEE…	24276.3	26446.1	24616.8	18816.6	23539	20173.3	25412.9	21560.6	22496.2	22410.8	23353.3	19006	28221.9	23153.7	23433.7	10778.5	10002.2	19017.9	12343.1	13035.4	15193.2	12962.2	13555.1	12970.1	13670.2
Bradi1g25657.1	0.427755	0.451872	0.476529	0.999499	0.60567	0.65776	0.476529	1.23896	0.972339	1.23896	0.972339	1.20372	1.19005	MASPYQRRHLPSSFLAPAAALLIAFLLAPLASAQTPWKSCGGSSNYTLNSTYQANIRLLSTTLPKNTSSSRTLFATESVGTLPDIVYALALCRGDTNASACGDCVATAFQDAQQLCAYDKDATVYYDPCFLRFSNQNFLSSTGGDNGNPLILTNTQNVTAPVKVFNDAVGVLMNATADYAARNSSKRFATGEEGFETVDKGKPKIYGLAQCRPDMASNDCRSCLANIIPYILQYMSGKQGGRILGIQCNYRYEQYPFFTGPSLLQLPAPSLGAAPEPAPGNPTLPVAGGAGTTNSTGRILAIALPIVAAILAAVIFCLCLWRRKRKPARKQSLPYSTNPEDIQTIDSLILDLATLRVATDNFDESNKLGEGGFGAVYKGILAGDEEIAVKRLSQSSRQG…	155649	111334	100969	90776.6	114682	141477	144159	151003	131706	142086	107382	84931.9	141276	112449	111510	142423	110371	164664	134721	138045	154855	192454	95244.6	103357	136477
Bradi1g25697.1	0.324222	0.348506	0.949896	0.648916	0.999783	0.545093	0.545093	1.09328	0.784389	1.09328	0.811397	1.02195	0.784389	MKEAGISMVVVLPCFLLLLLFLSSPLAAAAAADAAFSEYSCNGTTGNYTANDAFGANLERLTAALPADASAAPSLFASATIGTGPDTVYGLALCRGDITDARACSGCLDDAFRKLRGLCAGVRDATFYHDLCTLRYSGDDFLARPDDNSPVINAMDANSSTYADWDSRNATSQSLFLSRVDTLFSEMSIYGSYNSPARRFASAAMYINPTLPTVYGLAQCTPALSPAQCLRCFQGLKELIRQWYDGREGGRILGVRCNFRYEGYQFFGGSPVVRIGFAPSSPTGSNQKKTLIIVLCLSITVFCAMLVGCLLLIRRQRKGGGKTKLPHLPPHSRSSSKTEEALKLWKIEESSSEFTLYDFNELAVATDDFSEDNRLGRGGFGPVYKGTLPDGTEVAVKRL…	25909.1	27762.1	17705.6	21129.9	23126.7	32917	32223.6	13641.5	22353.6	25283.9	16031.6	18694.1	19176.3	21157.7	18764.9	22024.6	15705.2	29849.4	26958	23634.3	15497.1	16017.1	18867.7	22179.4	18140.3
Bradi1g25790.1	1.75821e-05	6.74248e-05	0.00802882	0.000210509	1.22528e-05	5.26213e-06	5.26213e-06	0.57457	0.158625	0.57457	0.358482	0.209558	0.158625	MASSLDAPNLDDYLPTDSLPQEPPRSLNLRDLLDISPVLTEAAGAIVDDSFTRCFKSNSPEPWNWNIYLFPLWCFGVVVRYGLLFPLRVLTLGLGWMVFFAAFFPVHFLLKGQNKLRSKIERKLVEMMCSVFVASWTGVIKYHGPRPSSRPYQVFVANHTSMIDFIILEQMTAFAVIMQKHPGWVGFIQKTILESVGCIWFNRNDLKDREVVGRKLRDHVQRPDNNPLLIFPEGTCVNNQYTVMFKKGAFELGCAVCPIAIKYNKIFVDAFWNSKKQSFTMHLGRLMTSWAVVCDVWFLEPQYLREGETSIAFTERVRDMIAARAGLKKVLWDGYLKHNRPSPKHTEEKQRIFAESVLKRLEES	36502.5	44303.8	40237.5	34640.1	38921	16175.6	18280.8	30425.4	24569.5	22362.8	21476.7	20936.3	12975.1	421.746	13952.5	6916.02	6577.5	10875	8256.19	8156.18	13402.2	10458.5	698.427	136.255	6173.85
Bradi1g25860.1	0.0213765	0.0303228	0.515872	0.633283	0.184965	0.698188	0.184965	1.51064	0.667073	0.667073	0.712975	1.51064	1.26203	MAAMATSASSLLKTSFAGARLPAAAARTPSSVATPRAGAICNSISASTPPYDLNAFKFSPIKESIVSREMTRRYMTDMITYADTDVVIVGAGSAGLSCAYELSKDPSISIAIIEQSVSPGGGAWLGGQLFSAMVVRKPAHLFLDELNIEYDEQEDYVVIKHAALFTSTVMSRLLARPNVKLFNAVAVEDLIVKEDRVAGVVTNWALVSMNHDTQSCMDPNVMEAKVVVSSCGHDGPFGATGVKRLQDIGMIDTVPGMKALDMNMAEDAIVRLTREVVPGMIVTGMEVAEIDGAPRMGPTFGAMMISGQKAAHLALKALGRPNGIDGTLKNATPALHPEMVLASANNGDVVDA	10062.5	19643	16991.2	10527.1	14306	11249.1	7692.23	8591.18	10640	9543.12	7093.64	7220.6	10215.4	16269.6	10199.8	12782.6	15615.7	30832.1	27214	21611.1	13174.2	18324.8	19194.3	21524.8	18054.5
Bradi1g25890.1	0.0049337	0.00845687	1	0.991556	0.00423766	0.278884	0.00423766	11.071	0.999256	0.999256	1.83586	11.071	5.42527	MASSVDLEDRFDISGPTHIMSRAGGTGRSSPTTIDWNKEEHRRCVAACIVKGTYILENDRTRCRVHAEALAPPWWESFHFRLVDVLKDESYKRSGDKFIFGAIYEHVPPPGGRHHHPSAPRYVVAFRGTMLLHPKAIHDLCLDFKILVNTLAECKRSQRAHQAVDTLLKTIANGKTAAGGGSSDSVWLTGHSLGASLALDVGRAMMSEQGLSIPTFLFNPPQVSLAPAINKLLPSEGLRRDLYAKSNLVKAGLGLVLSPHRKRMEKLFELLSPWAPNLYVHDKDLICQGFIDYFGQRQQWEAQEEQRCRGGVSKSSSAMTLSYRDMLFSVLGKEKERPHLLPSATLWRNSSVGSDAHGLQQWWKPDGELRLSDRRYSYP	8603.09	4150.8	32280.4	33248.5	19570.7	23545.4	10641.8	27125	16912.2	19556.1	40515	18529.5	44126	40545.9	35929.1	422446	95315.8	186533	162370	216666	46401.2	65085.2	180751	132468	106176
Bradi1g26310.1	0.0595785	0.0757506	0.227106	0.0292394	0.973552	0.302992	0.0292394	1.2574	1.0387	1.1608	1.2574	1.0387	1.14492	MGQCCSRATSPDSGRGVNGYGYSHQPKQAQTPPSYNHAHPPPQAEVRYTPPAMNPPVVPPVVAPSKPTPDTILGKQYEDVRSVYSLGKELGRGQFGVTYLCTEIATGRQYACKSISKRKLVSKADKEDIRREIQIMQHLSGQPNIVEFCGAYEDKSSVHVVMELCAGGELFDRIIAKGHYSERAAATICRGVVNVVNVCHFMGVMHRDLKPENFLLATKDENAVLKATDFGLSVFIEEGKMYRDIVGSAYYVAPEVLKRNYGKEIDVWSAGVILYILLSGVPPFWAETEKGIFDAILQGDIDFESQPWPSISESAKDLVRKMLAQDPKKRINSAQVLQHPWLREGEASDKPIDSAVLSRMKQFRAMNKLKKMALKVIASNLNEEEIKGLKQMFSNMDTD…	1.78014e+06	1.8637e+06	2.45432e+06	2.55967e+06	2.16446e+06	2.69178e+06	2.65776e+06	2.22682e+06	2.47362e+06	2.51249e+06	2.66548e+06	3.16004e+06	2.43205e+06	2.62878e+06	2.72159e+06	2.24613e+06	2.35191e+06	2.19711e+06	2.19774e+06	2.24822e+06	2.53891e+06	2.25513e+06	2.71031e+06	2.40816e+06	2.47813e+06
Bradi1g26350.1	1.08203e-06	8.24662e-06	0.16658	0.953094	2.63272e-07	0.000706038	2.63272e-07	3.93184	1.17774	1.68673	1.17774	3.93184	2.70722	MSCSHLSTAWSSSALASSSTRRRGASSSSSSSLVVRCSLRDLRNRIESVRNTQKITEAMKLVAAAKVRRAQEAVVSSRPFSEALVEVLYNMNQEIQTEDIDLPLTRQRSVKRVALVVLTGERGLCGAFNNNVLKKAESRMEELRQLGVEYTVISVGKKGNAYFQRRPYIPSERFLELAGIPTVKDSQAICDLVYSLFVAEEVDKVELLYSKFVSLVRSDPIIQTLLPMSPKGEICDVNGICVDATEDELFKLTTKEGKLTVEREKIKIETQPFSPVVQFEQDPVQILDALLPLYLNSQILRALQESLASELAARMSAMSSATDNAIDLRKNLSIIYNRRRQAKITGEILEIVAGADALSG	4455.26	3958.67	2814.51	4920.6	4037.26	4032.87	8229.83	8133.81	6842.53	6809.76	5393.29	5821.5	4273.05	3531.52	4754.84	19819.8	16232.3	13852.5	13590.9	15873.9	8849.03	9955.27	11475.7	13438.9	10929.7
Bradi1g26510.1	0.000963941	0.00202864	0.578802	0.883322	0.0158581	0.0600245	0.0158581	1.10949	0.699671	1.10949	1.06469	0.699671	0.761542	MGSRSRGGRSSSGLLLLSLHLLLGLHSSLRCFVSAAGGGGSGEPYVGVTIGTAVTNLLSPSDLAAFLRAQRITRVRLYDADPRLLSALASSGARAIVGVPNDELLALGSSPATASAWVSRRVLPFAGANSSSPGLISAIAVGDEVPTALPSALPVLLPAIQSLAAALAAANLSSIPVSTPLPFSIVLDPFPPSQAYFNQSLAKSFILPLLSHLANTSAPLMLNLYPYYSLMQSSGVVPVDNAMFKPLPPSLEMVDPNTLLHYTNVFDAMLDAVYVALKNLNVSAPVPVLVTETGWPSYGDRKEEPYASRDNANTYNSNLIKHVVTDKPGTPMRPGAQASVYIYELFNEDLRPGPVSEANWGLFHGNGTPVYLLHASGADGFLGNATTDRTFCIASDDAD…	25827.9	23158.2	27673.6	25145.3	25451.2	31341.4	28787.8	22854.6	29967.4	28237.8	29843.8	19341.9	30186.5	29018.4	27097.7	18043	16815.2	21422.5	14949.3	17807.5	17619.8	19978.7	19983.1	19947.2	19382.2
Bradi1g26690.1	1.46292e-07	1.74704e-06	0.311414	1.11392e-06	5.08007e-07	1.42753e-06	5.08007e-07	0.93365	0.605758	0.93365	0.699942	0.605758	0.702495	MAGKEIYHKMKDKVKDAFSSSGPETGKGKTKLSGKRVKHGYHLVKGKSNHPMEDYLVAEYRQVGEHDLGLFAIFDGHLGHTVPDFLRAHLFDNILKEPEFLSDTKSAIRNAYLLTDEKILERAAELGRGGSTAVTAILISSDDSVKLVVANVGDSRAVISENGKAEQLSVDHEPSMERQTIEEKGGFVSNLPGDVPRVDGQLAVARAFGDRSLKKHLSSEPHVAEIVIDENSDFLILASDGLWKVMTNQEAVDEIKDFKDAQSAAKHLTEQAVNRRSKDDISCIVVKFHC	120397	131774	138761	119193	127531	120949	121767	109936	123626	119069	79843.6	88079.9	90450.9	98683.5	89264.5	83727	73776.9	71691	79817.1	77253	92037.3	84832	84296.2	97194.7	89590
Bradi1g26770.1	2.5615e-05	9.23921e-05	0.00145825	5.41934e-05	1.78624e-05	1.35717e-05	1.35717e-05	0.536817	0.298	0.536817	0.347193	0.321692	0.298	MATPPTLVLLPEWGAGHLMSMLESCKRVLLSGGRAFSITLLVMRPPTAAATSEVEAHVRREAASGLDIRIHRLPAVEPPADAAGVEEFIARYIELHAPGVRDAVAGMSCPVAALVLDLFAAPMVDVAQDLGVPSYVFMSSTGAMLALMLHLPVLHEAVTVEFEEVEGGVVHVPGLPPIPHEWMPCPVVDKKSPNYTWFVRLGERFMDATGIIANTADELEPGPLAAIAEGRAVPGRPAPPVYPIGPVLSLGSSSSKKESSSGPPHACVAWLDAQPRASVVLLCFGSMGWFEAAQVVEICAALERCGAHRFLWVLRGPPGADTGAGAPDGSEHPTDADLDELLPEGFLERTAGRVLVWPTWAPQKEILAHAAVGGFVTHCGWNSVLESLWHGVPMAPWPL…	148529	232813	169738	113957	166259	102957	76454.9	76176.8	101414	89250.7	63820.7	55088.7	48912.6	63074	57724	68125.4	49913.8	45354.3	50543.1	53484.2	50850.5	37499.9	48672.8	61157.9	49545.3
Bradi1g26850.1	0.0179071	0.026172	0.895508	0.750786	0.0250184	0.439647	0.0250184	1.08218	0.631389	1.08218	0.886921	0.631389	0.829017	MASEQVIGKLSVRVVRGSNLIVADPLTHTSDPYVVLCYGSQKVKTSVQKKNANPLWNEVLQLPVTNPTKPVKLEVFDEDKFTADDSMGVAEFNVTDIYDAAKLDLKHASDGTRIKTIYPVGTNYLGGESHVSWKNGKVVQDLILKLKNVDSGSIVLQVEWVHVPGVTL	256519	323994	422756	501499	376192	328980	377392	447804	474249	407106	280002	354636	308943	391031	333653	229595	222784	221018	276697	237524	310840	350052	316653	269933	311870
Bradi1g27010.1	0.676887	0.689148	0.978562	0.999943	0.70955	0.96711	0.70955	1.09208	0.781627	1.09208	0.98021	0.781627	0.895961	MAPVSALAKYKLVFLGDQSVGKTSIITRFMYDKFDNTYQATIGIDFLSKTMYLEDRTVRLQLWDTAGQERFRSLIPSYIRDSSVAVIVFDVASRQSFLNTSKWIEEVRTERGSDVIIVLVGNKTDLVDKRQVSIEEGEGKAKDLGVMFIETSAKAGFNIKALFRKIAAALPGMETLSSAKQEDMVDVNLKSGNANSSQSQAQAGGCSC	6478.26	8641.43	9814.69	9575.65	8627.51	4856.59	7973.59	16055.9	8801.54	9421.92	7698.9	9991.66	9783.82	6352.68	8456.76	5401.69	3974.8	9112.87	8484.59	6743.49	7367.62	7714.24	6772.43	9065.33	7729.91
Bradi1g27130.1	1.19952e-09	4.62328e-08	0.997039	0.984458	4.82498e-08	1.60298e-10	1.60298e-10	17.0433	1.31481	1.31481	1.49049	12.6621	17.0433	MAPLATSTAPLQLCSHHSHPRRRRGTVEVAASASSSSSRRAEDVVIVGAGIAGLATALSLQRLGVRATVLEQGPSLRAGGTSLTLFKNGWRVLDAIGVADDLRAKYLRIQGMRMRSAAGGRDLREFSFEEEAPGQEVRAVERRALLETLASKLPADAISYSSKLKSVAGQGAEGTVLELEDGRRLLAKVVVGCDGVNSPLARWMGFSEPRYVGHMAFRGLADYGGIGAQGQPFEPKVNYIYGRGLRAGFVPVSATKVYWFICFNSSTPPPGLGKKTKTAAGAALKREALELVRGWPEDLVAVMRGTADDAVVKTPLVDRWLWPGVAPRASRGGVVLAGDAWHPMTPNLGQGACCALEDAVVLARRLAPAVLAGGAVVGEAMRGYERERWGRVFPLTARA…	1821.44	1351.65	1001.66	870.352	1261.28	1760.31	1370.21	2237.91	1264.94	1658.34	2134.44	1634.55	2061.87	1688.84	1879.92	16345.1	12184.1	14531.5	20820.7	15970.4	16710.8	21832.4	24525.8	22916.1	21496.3
Bradi1g27157.1	0.00527559	0.00899719	0.778733	0.00632913	0.971677	0.99894	0.00632913	1.55372	0.932494	1.1321	1.55372	0.932494	1.0281	MNPEYDYLFKLLLIGDSGVGKSCLLLRFADDSYLESYISTIGVDFKIRTVEQDGKTMKLQIWDTAGQERFRTITSSYYRGAHGIIIVYDVTDQDSFNNVKQWLNEIDRYASENVNKLLVGNKCDLTDKRVVSYETAKAFADEIGIPFMETSAKNALNVEQAFMAMSASIKDRMASQPAANNARPATVQIRGQPVEQKTSCCSS	20667.8	30414.9	24392.3	32247	26930.5	23839.8	30754.3	29639.3	37719.2	30488.2	34428.2	44980.4	37655.1	50306.4	41842.5	21916.5	28915.9	19616	30001.8	25112.6	24453.4	32668.5	24184	29443.2	27687.3
Bradi1g27332.1	8.33158e-05	0.000246476	0.997421	0.000779095	0.000602172	0.00104942	0.000602172	0.968801	0.356009	0.968801	0.377285	0.356009	0.404282	MGAYKFVSELWRRKQSDVMRFVQRVRCWEYRQQPAIVRITRPTRPDRARRLGFKAKQGYVVYRIRVRRGGRKRPVPKGIVYGKPKHQGITQLKFQRNKRSVAEERAGRRLGGLRVLNSYWVNEDSTYKYFEVILVDVAHNAVRNDPRINWLCKPVHKHRELRGLTSAGKKFRGLRGKGTRHHKNRPSRRATWKRNQTVSLRRYR	7895.31	11624.4	14813.8	13162.2	11873.9	14502.5	14774.1	8982.96	7754.24	11503.5	4907.1	4290.94	3513.72	5207.64	4479.85	4253.22	3678.67	3837.56	5139.45	4227.23	5479.8	3854.14	4875.85	4991.86	4800.41
Bradi1g27344.1	0.00151979	0.00306456	0.569625	0.14604	0.0884204	0.0708518	0.0708518	1.39094	0.5359	0.776887	1.39094	0.557765	0.5359	MAATLHAKINRKRLDKLTSSKSGGVVIVYERKVKLLYGSYRPKLCALFLADDVSRLLVDINEAWRIRPVVDHTVLPKGKAQARYKAVTLPENMMDMEVEQPMLFSDTNTARFRGMSLDDLGEQYFNVNLDDDDFSRAEHHHQAEAVNITLVDNFESGLAETDVFNRFERFDIANDDTTVNITPDEHPQAPSTLAPSPPRQEDPPQQQEQHYAAPSPNQEEPQLGDPSKDQEEQKMKERQPNRPSKRKARGKGLQVTMDNQTMIPGNIYQTWLKDPLSFISKRRRVSSKINLIKAIKIGDLMELPPVALISYLEKSPLELYYPKQLMQLWKECTEVKSTKASSPGGKLPSSQEQQPRNSPPQPQGEYQGEMGAQPMDFTDCIEKVRGNKSGEYERVDDAL…	5378.67	5176.97	8175.32	9595.26	7081.56	7673.28	7197.4	2712.1	4423.47	5501.57	9730.6	9403.3	10924.7	9341.36	9849.99	5194.51	5191.54	2088.48	3324.85	3949.85	5332.75	1061.58	4870.12	3915.56	3795
Bradi1g27740.1	0.00184815	0.00360803	0.928368	0.0163827	0.0177499	0.999722	0.0163827	2.55688	0.713514	0.713514	2.55688	2.53417	1.06427	MSNLKLGVEVVSAHDLIPKEQGTANAFVEVEFDDQKFRTAIKDRDINPVWNEQFFFNISDPSRLQEKELEAYVYHANRVSNNKTCLGKVRISGTSFVSQSDAAPLHYPLEKRTILSRARGELGLRVFLTDDPSVRVSAPGQDFNFASTPTTAQEQATVNSIPNPFQETRTNEVRQFQHLPREQQRPAPMAGQQYYAQGQGSYGDQQQRNYAAAGNKPEAPQVRMYSAGPQQPVDFQLKETSPTLGGGRIVHGRVMPGEKAGAYDLVEKMHILFVRVVKARELPHMDLTGSLDPYVEVHLGNYKMKTKFFEKNQRPEWDEVFAFPKEVVQSSTLEVVVKDKDILRDDYVGRVMLDLNEVPVRVPPDSPLAPEWYRLMGKDGMRDRGELMLAVWYGTQADE…	2367.52	807.961	818.17	0	998.413	767.006	861.811	705.632	515.078	712.382	2757.95	2187.74	2759.5	2506.08	2552.82	2880.16	3719.68	2067.96	1452.8	2530.15	1555.72	566.809	1018.87	1108.94	1062.59
Bradi1g28490.1	0.000152798	0.000411427	0.339436	1	8.75472e-05	0.221684	8.75472e-05	2.36854	1.00589	1.37119	1.00589	2.36854	1.4344	MASIIVQVSAILLNLIAFGLAVAAEQRRSKATVTPDLAKEYDYCVYDSDVATGYGVGALLLLTAAQVLVMVASRCFCCGRGLKPGGSRACALMLFLFSWLTFLVAAACLLAGSVRNAYHTRYRGIFNGDPLSCETLRKGVFAAGAAFTFFTAILSEFYYISYSKSRDAAGGAPYGGSSIGMGPYN	32001.8	24739	17910	23655.5	24576.6	27416	32039.4	39103.2	36238.1	33699.2	25094.1	27830.4	23806.4	22154.9	24721.4	71348.1	70953	46361.7	44180	58210.7	34555.8	30765.8	43022.8	32666.1	35252.6
Bradi1g28760.1	0.000394464	0.000935205	0.217646	0.688816	0.0018563	0.021406	0.0018563	1.07809	0.671044	0.857272	1.07809	0.671044	0.7622	MAKDEVMESGGGHQDFAAKDYTDPPPAPLIDAAELASWSLYRAVIAEFIATLLFLYITVATVIGYKHQTDVSASGPDAACGGVGILGIAWAFGGMIFVLVYCTAGISGGHINPAVTFGLFLARKVSLVRALLYMIAQCLGAMCGVGLVKAFQSAYFVRYGGGANTLAAGYSKGTGLAAEIIGTFVLVYTVFSATDPKRSARDSHVPVLAPLPIGFAVFMVHLATIPITGTGINPARSLGAAVIFNKDKAWDDQWIFWVGPMVGAAIAAFYHQYILRAGAIKALGSFRSNA	5.45575e+06	5.89354e+06	7.72786e+06	7.82936e+06	6.72662e+06	5.57889e+06	6.43168e+06	5.2386e+06	5.81702e+06	5.76655e+06	7.04476e+06	7.82318e+06	7.35059e+06	6.789e+06	7.25188e+06	4.04172e+06	4.55565e+06	4.46332e+06	4.99475e+06	4.51386e+06	4.43989e+06	5.64497e+06	5.729e+06	4.69425e+06	5.12703e+06
Bradi1g29000.1	0.0165351	0.024378	0.0205476	0.520948	0.00837111	0.239179	0.00837111	1.79021	1.28287	1.69441	1.28287	1.79021	1.4024	MASTNMASATSRFMLAAGAVPSGGVGSSNRVSFVPSSNRLGRKLVARAEEEPAAPAPTPAAAPETAEGAVATKEPAKAKPPPIGPKRGAKVKILRRESYWYNGTGSVVTVDQDPNTRYPVVVRFAKVNYAGVSTNNYALDEIKEV	20240	15810	17715.7	17599.3	17841.3	35183	24513.7	34546.3	26678.8	30230.4	18838.1	24595.9	21269.9	26848.5	22888.1	37412.7	43214.6	23720.1	23410.8	31939.6	28162.3	25330.8	24799	21790.4	25020.6
Bradi1g29300.1	0.000353586	0.000851763	0.678604	0.0165352	0.000151634	0.00533265	0.000151634	0.888613	0.406914	0.888613	0.652915	0.406914	0.592385	MASGPFDSPTSSPAGAAAFHDDPFLSFDGPAASPAAGIDDGFPASPDPYASAAAGAHPFGMPDSNGALHHDDDEGLFSSHNGTGPVLPPPTEMGADEGVLLREWRRQNAILLEKKEEHEKELRSQIILEAEEFKNGFVEKRKLNLETSKDHNRDREKLFLANQEKFHTGADKQYWKAISELIPHEIANIEKRGAKKDKDKKPGIVVVQGPKPGKPTDMARMRQILLKLKHTPPPHMKPPPPPAPAAAAKDGAPAAAGKDGAKAAAPAPANGTVPEMEKAAAAATPAAAAAPAPAAEPIAAA	26396	25129	23886.4	17672.4	23271	25564.5	18216.2	21555.3	17379.5	20678.9	13717.2	13276.2	18639.2	15143.2	15194	6714.52	4946.78	15297.5	10918.3	9469.27	11022.9	13648.3	14957.2	15513	13785.4
Bradi1g29520.1	3.98813e-07	3.68493e-06	0.00100085	6.64711e-06	1.34032e-08	3.17152e-07	1.34032e-08	0.622661	0.242023	0.622661	0.398663	0.242023	0.262308	MADLQEPLVRGKRKKVLVDYLVQFRWILVIFVVLPISSLIYFNIYLGDMWSAMKSEKKRQKEHDDNVQKVVKRLKQRNPKKDGLVCTARKPWIAVGMRNVDYKRARHFEVDLSAFRNILEIDAERMVAKVEPLVNMGQISRATCPLNLSLAVVAELDDLTVGGLINGYGIEGSSHLYGLFSDTVVALEIVLADGKVVRATKDNEYSDLFYGVPWSQGTIGFLVSAEIKLIPIKEYMRLTYTPVKGDLKEIAQGYADSFAPRDGDPSKVPDFVEGMVYNPTEGVMMTGVYASKEEAKKKGNKINSVGWWFKPWFYQHAQTALKKGEFVEYIPTRQYYHRHTRCLYWEGKLILPFGDQFWFRYLFGWLMPPKVSLLKATQGEAIRNYYHDNHVIQDMLVPL…	79346.5	118799	134319	95685.2	107038	73203.3	58172.8	60423.7	74792.7	66648.1	41225.9	43310.7	37398	48753	42671.9	33444.1	26633.2	23446.2	20098.7	25905.5	29753.4	24880.7	27184.1	30489.1	28076.8
Bradi1g29550.1	0.000333445	0.00080757	0.502352	0.00622537	0.979142	0.0852678	0.00622537	1.21612	0.662723	0.882571	0.662723	0.962579	1.21612	MAALPLATAEVCDANSHLITNGELRALQPIFQIYGRRQVFAGPVVTLKVFEDNVLVREFLEEKGQGRVLVVDGGGSLRCAILGGNPVQQAQNNGWAGIVVNGCVRDVDEINGCDIGVRALGSHPMKANKKGVGEKHVPVTVAGTRVCDGEWLYADTDGILISSTELIV	12184	13354	9492.17	12809.3	11959.9	9785.45	10287.1	10233.5	11915.6	10555.4	9655.31	7464.4	6118.22	8466.39	7926.08	9472.33	12833	13602.6	10141.3	11512.3	15223.9	13684.7	13624.6	15645.1	14544.6
Bradi1g29776.1	0.480073	0.502419	0.492475	0.999928	0.692801	1	0.492475	1.23293	0.983163	1.23293	0.983163	1.17965	1.00238	MGNCASAMDGLIPWGNKAAAAANPGMSASKRTSSSSTTTGKLSTISTSTFMPSTVSGVSTDDGYPEGEILESPNLRIFTFAELKSATKNFRPETVLGEGGFGKVYKGWVDEKAMNPSKMSTGGVIAVKKLNSESVQGMEQWQSEVNFLGRISHPNLVKLLGYCMEDNELLLVYEYMAKGSLENHLFRRGAVYEPLPWSLRLKILMGAARGLAFLHSSERQVIYRDFKASNILLDSHFNAKLSDFGLAKHGPDDGESHVTTRVMGTYGYAAPEYVSTGHLYVKSDVYGFGVVLLEMLCGLRALDPSRPTEKLNLVNWAKPLLADRRRLSQLMDSRLEGQYHARGAFHAAQLTLKCLSGDPKSRPSMKEVVEELERIELMRSKSRSREVRRDSSSVARGQA…	514.569	741.855	470.856	499.24	556.63	793.344	603.13	709.486	639.178	686.284	543.99	532.674	595.746	516.622	547.258	690.646	623.583	541.314	770.968	656.628	764.71	417.981	284.638	764.48	557.952
Bradi1g29792.1	6.69452e-07	5.64432e-06	0.999981	0.99987	0.000100897	1.14797e-05	1.14797e-05	69.802	0	0.386556	0	52.4841	69.802	MGMTMRAAALSAGHDGDERALVAFKEKVSDRSGVLASWNQSVSYCTWEGVRCSKRHRSRVVVLDLHSQGLSGTISPAIGNLTFLRYLDLSINPLHGEIPPSIGSLRRLEYLGLQRNMLTGAIPINISRCTSLRSMTIADNKGLQGSIPAEIGDMPSLSVLQLYNNSLTGTIPSLLGNLSQLTKLSLAANHLQGSIPEGIGNNPNLGFLQLAINNFTGLLPLSLYNLSSLHRFYMTDNNLHGRLPADLGRILPSMQVFAIGNNQFAGFVPPSITNLSRLQAFDVPNNRFNGVFPSALGRLQYLQWFNLVGNMFEANNEQEWQFLTSLTNCSRLQLMSIEQNRFSGQLPTSLCNLSTNIQEINIFANNISGIIPSDIGNLIGLEVLVLGRNLLDGIIPESI…	149.689	345.771	403.866	733.926	408.313	0	134.115	497.228	0	157.836	0	0	0	0	0	23832.2	11956.2	22797.9	27133.5	21429.9	18825.1	25008.9	41060.8	29109.3	28501
Bradi1g30007.1	0.0912072	0.110946	0.29176	0.999998	0.643309	0.807181	0.29176	1.37164	0.424879	0.424879	1.01371	1.37164	1.28611	MSTFARYTKELRELIAGSSTTGPSSVHYEDKLREVLSILLRDHVLPSPTDAANKRETTVVLKLLDYTARRNPGVFFNGRAAEVIRVIGRIFPFFADPDFGCVSQRETYGGRSHSTRFGLFSHFSAQVTEKPTGNVLYVASKRAEKPCGVLSRCLVKCLCGSFSDILEFPGFFSELPDSCQPKNGPGVLVDLTGDMRWRPFVTSLITLINKCLTDGTLYVEGLVSMQFVSSACSILCYGDESLHKVCFDFARIVATVMKVEILPMETIIRSITCILNQDVDDLSMFRDADYDFSMGACLHALHSSCPACIVESTAVDIVNVFASAMQTSKSSELQAAMCSAYKRIVKVCSPLVWKPEILLKLLYLPKPYDKLIECIRLVVDKFGRSFICVDDNDDQNSFL…	99674.7	51088.1	63575.2	21627.3	58991.3	38027.4	17088.6	28898.7	16242	25064.2	50367.4	28782.7	101388	58661.9	59800	62620.7	106606	40063.3	114370	80915.2	59478.1	58596.4	76310.5	109092	75869.2
Bradi1g30110.1	0.0163712	0.0241893	0.991549	0.0352754	0.619	0.0200317	0.0200317	2.49945	1.15512	1.15512	2.36708	1.53901	2.49945	MGCVFSRRHDGEAEGDEGPRPRSIHHQYQQQQQQRSPLGPAYDARRGRYGPGDYDSGELAIPPPPRKQLPSHKVSETGTFLGRASIAGLEKAVEVLDTLGSGIASLNHGSGFLYGGTNRGNKVDILAFEVANTIAKASSLWRSCSDESIKELKEEILHSDGVRILISSNSSELLHIAALDKREELAIFSREVIRFGDLCKDPIWHNLGRYFDKLMADFTPQDHSKEHMETTVQHLITLAQNTSELYHELHALDRFEQDFQRKFHEEESVPAARRESVMILHSELKRQRKLVKTLKKKSLWSKPLEDIVEKLVDIVIFLHKQIRDAFGEAVPVGTDFIDYEQVQNRRLGPCGLALHYANIINQIENIVSRPLSLPPSARDNLYHGLPITVKSALRARLQS…	12414	10455.5	16395.4	10079.3	12336.1	12937.3	21223.9	9514.55	13322.7	14249.6	26660.1	28432.8	27262.8	34446	29200.4	30119.1	19432.9	9589.24	16800	18985.3	22068.3	27052.2	52667.1	21545.6	30833.3
Bradi1g30130.1	0.000237879	0.00060206	0.00256197	0.00132158	0.000123831	0.000337315	0.000123831	0.504011	0.315334	0.504011	0.458508	0.315334	0.363682	MRKWALSSALLLVFLLATLSPDPAKRLQVNAEESSDELADLPKVEEKLGAVPHGLSTDSEVVKRESESISRKTLRNSAEKFEFQAEVSRLMDIIINSLYSNKDIFLRELISNASDALDKIRFLGLTDKEVLGEGDTAKLEIQIKLDKENKILSIRDRGVGMTKEDLIKNLGTIAKSGTSAFVEKMQTGGDLNLIGQFGVGFYSVYLVADYVEVVSKHNDDKQYVWESKADGSFAISEDTWNEPLGRGTEIKLHLRDEAKEYLEEDKLKDLVKKYSEFINFPIYLWATKEVDVEVPADEEESSEEESTTETTEEEETEDSEEKKPKTKTVKETTTEWELLNDMKAVWLRNPKEVTEEEYSKFYHSLAKDFGDDKPMSWSHFSAEGDVEFKALLFVPPKAP…	205685	194559	150769	90167.5	160295	64133.7	68453	82646.5	107929	80790.6	76776.3	54810.7	79826.3	82573.6	73496.7	44932.3	38518.6	62118.8	56616.8	50546.6	72889.4	51310	48378.9	60607.8	58296.5
Bradi1g30210.1	9.85059e-06	4.24505e-05	0.00971855	0.000865351	4.88858e-05	1.71059e-05	1.71059e-05	0.743751	0.421604	0.743751	0.656198	0.421604	0.525931	MVKFLKPGKAVILLQGRYAGRKAVIVRVFEEGTRDRPYGHCLVAGLAKYPKKVIRKDSAKKTAKKSRVKCFLKLVNFTHLMPTRYTLDVDLKDVASGGPDALASSDKKVAAAKSAKARLEERFKTGKNRWFFTKLRF	61268.3	84055.3	77908	77910.8	75285.6	42904.4	60106.2	55203.7	65760.6	55993.7	51229.3	56881.5	40946.7	48551.7	49402.3	36094.9	35449.5	31021.9	24396.6	31740.7	34115.8	36965.9	47042.2	40256.1	39595
Bradi1g30450.1	0.0285966	0.0392041	0.786005	0.941593	0.997273	0.0447048	0.0447048	1.6729	0.862082	1.21487	0.862082	0.940867	1.6729	MQRPGDFKLPPFFNYPPYFTLQPVRETREKQVQLWKDLILDYCRTQKIYIVPLEEDFPLFSNSNIERSLSYEAKEVFLAALVNEGRAEWMDKGHKRCLILWLRIQDWANYILDFVRDNGLEVTTIEDIRSGIETTGTELAGIDRGVLMRALRLLEQKGKATIFKGTSADDEGVKFSV	21921.5	31155.2	39547.8	42459.7	33771	31714.5	48983.5	37722.6	45689.8	41027.6	26839.9	40946.3	30009.3	18658	29113.4	25702.4	12455.1	43116.1	45822.7	31774.1	48120.4	76777.8	52984.3	48099.8	56495.6
Bradi1g30527.1	0.226942	0.249914	0.901271	0.430428	0.927682	0.913303	0.430428	2.26175	0.435991	1.58842	2.26175	0.467738	0.435991	MRCRGLVVLSLLTLHVLLCIVNGVFSGRTSSYVRTEFPSTDMPIDSEWFATPNGYNAPQQVHITQGDYDGKAVIISWVTVSEPGLSEVFYSKEENRYDQKAEGTSTSYTFYDYKSGYIHHCLVDGLEYNTKYYYKIGTGGSAREFWFQTPPAIDADASYTFGIIGDLGQTFNSLSTLQHYEKSEGQTVLFVGDLSYADRYEHNDGIRWDSWGRFVERSTAYQPWIWNSGNHEIEYRPDLGETSTFKPYLHRYKTPYLASNSSSQMWYAVRRASAHIIVLSSYSPFVKYTPQWMWLRSEFKRVDREKTPWLIVLMHAPMYNSNNAHYMEGESMRAAFEKWFVKYKVDLVFAGHVHAYERSYRISNVNYNITSGSRYPVPDKSAPVYITVGDGGNQEGLAS…	335.472	491.031	192.088	2032.6	762.797	1396.22	929.514	704.881	1815.96	1211.64	501.993	1432.01	729.327	4237.69	1725.26	1207.59	0	0	219.57	356.79	0	26.1634	490.223	813.906	332.573
Bradi1g30550.1	7.99261e-05	0.000239546	0.0125173	0.00431874	4.64782e-05	4.30385e-05	4.30385e-05	0.673826	0.390889	0.673826	0.623239	0.41941	0.390889	MVLSELATQLVVPVAAVVGIAFAVLQWVLVSKVKVTPERRDGEGASSGAAAGAGKNGAAAGSEYLIEEEEGLNDHNVVVKCAEIQTAISEGATSFLFTEYKYAGGFMAIFAVLIFLFLGSIEGFSTKDQACHYSKGKTCKPALANALFSTIAFVLGAITSLVSGFLGMKIATYANARTTLEARKGVGKAFITAFRSGAVMGFLLAASGLFVLYVAINVFGLYYGDDWEGLFEAITGYGLGGSSMALFGRVGGGIYTKAADVGADLVGKVERNIPEDDPRNPAVIADNVGDNVGDIAGMGSDLFGSYAESSCAALVVASISSFGINHEFTPMMYPLLISSVGIIACLITTLFATDFFEVKAVDEIEPALKKQLIISTALMTVGIALVSWLGLPSTFTIFN…	128373	157553	132472	83379.9	125445	109492	78760.5	69284.9	80573.3	84527.8	76744.7	76990.9	70710.7	88281.6	78182	57497.9	65007.5	42435.1	45510.2	52612.7	49227.4	47821.2	50456.2	48634.7	49034.9
Bradi1g31240.1	0.439812	0.463158	0.710023	0.604674	0.994581	0.997279	0.604674	1.06051	0.758729	0.79159	0.758729	1.06051	1.05051	MEAKAEGMARGAVAALAAAAALLVGLDTQTETVLLIRKKATVRDVQALWVLALAASAAAGYHLLHLLRCLYLARFSSAEAHGPCGPNRNSSSSKALAWTCLLLDKETVSTELSVHITSPQMGCAYMVFAVTVAAAQACVIALEGERALQWNKLCNIYTRFCEQVAGSLACGMLAAAGTAVLAAVSARKLFRLYPSLSSSSATTKATTK	5486.06	3183.91	5837.5	5807.61	5078.77	2271.53	3517.66	6125.84	4166.17	4020.3	3993.59	3347.16	5081.78	2991.11	3853.41	3479.54	4203.58	5580.43	8280.82	5386.1	5779.6	6653.09	3788.25	5120.27	5335.3
Bradi1g31690.1	1.35589e-06	9.6203e-06	0.0520584	0.000118918	5.67501e-07	7.13214e-07	5.67501e-07	0.784234	0.34126	0.784234	0.524518	0.34126	0.346223	MAHGDRMTTFEESERESEYGYVRKVSGPVVVADGMGGAAMYELVRVGHDSLIGEIIRLEGDSATIQVYEETAGLMVNDPVLRTKKPLSVELGPGILGNIFDGIQRPLKTIAIKSGDVYIPRGVSVPALDKDQLWEFQPNKLGVGDAITNGDLYATVFENTLMKHHVALPPGSMGKISYIAPAGQYSLQDTVLELEFQGIKKEFTMLHTWPVRTPRPVSSKLAADTPLLTGQRVLDALFPSVLGGTCAIPGAFGCGKTVISQALSKYSNSDTVVYVGCGERGNEMAEVLMDFPQLTMTLPDGREESVMKRTTLVANTSNMPVAAREASIYTGITIAEYFRDMGYNVSMMADSTSRWAEALREISGRLAEMPADSGYPAYLASRLASFYERAGKVQCLGSP…	4.53179e+06	6.76938e+06	6.86625e+06	5.15847e+06	5.83147e+06	5.14311e+06	4.182e+06	4.22987e+06	4.73797e+06	4.57324e+06	2.96887e+06	2.67706e+06	2.87843e+06	3.71049e+06	3.05871e+06	2.53214e+06	2.5173e+06	1.52877e+06	1.38197e+06	1.99005e+06	2.03398e+06	1.94035e+06	2.0962e+06	2.00544e+06	2.01899e+06
Bradi1g31850.1	0.138277	0.160392	0.998538	0.556562	0.190016	0.262399	0.190016	1.03316	0.683854	1.03316	0.802428	0.683854	0.71577	MDSSNAAGTSNGGSGDGDPAAAARRNTKMPKYSKFTQQELPACKPILTPKWVVSVFFLVGVIFVPVGVVSLLAARDVVEIIDRYDDACVPVNMTDNKLGYIQNETISKECTRTLTVTKDMKQPIFVYYQLDNFYQNHRRYVKSRNDAQLRDYKKANQTTSCEPERTTADGKPIVPCGLIAWSLFNDTYIFNRGNENLTVDKKDISWKSDREHKFAKNVYPSNFQNGGLIGGAKLDSSIPLSDQEDLIVWMRTAALPTFRKLYGRIYVDLKENDTITVKLDNNYNTYSFGGKKKLVLSTATWLGGKNDFLGFAYLIVGGLCIFLAFAFTLLYVIKPRKLGDHNYLSWNRHPAGR	20645.3	22746.5	35115.6	45257.2	30941.1	23773.3	35222	33886.3	34986.7	31967.1	23538.8	26519.8	26365.1	22888.5	24828	16246.1	14997.5	25801.2	27592.1	21159.2	29805.8	23686.9	16613.8	18480.5	22146.7
Bradi1g32310.1	0.544837	0.564505	0.868868	0.854885	0.409638	0.381095	0.381095	3.75641	2.3328	2.3328	2.38171	3.66213	3.75641	MAPPSMSLAAKGVLPFAALPSVGVSQRPVSVTASLEHKTSDAKRKFLKLALGGVGLPALLGAKKALADDQGVSSSRMSYSRFLEYLDKDRVKKVDLFENGTIAIVEAISPELGNRVQRVRVQLPGLSQELLQKLREKNIDFAAHNNQEESGSLLFNLIGNLAFPLILIGGLFLLSRRGSGGMGGPNGPGFPLGFGQSKAKFQMEPNTGVTFDDVAGVDEAKQDFMEVVEFLKKPERFTAVGARIPKGVLLIGPPGTGKTLLAKAIAGEAGVPFFSISGSEFVEMFVGVGASRVRDLFKKAKENAPCIVFVDEIDAVGRQRGTGIGGGNDEREQTLNQLLTEMDGFEGNTGIIVVAATNRADILDSALLRPGRFDRQVSVDVPDVRGRTEILKVHGSNKK…	1597.18	2384.78	2385.81	5283.46	2912.81	7179.51	6704.82	8231.55	5064.09	6794.99	13639.6	4945.45	5434.01	3730.88	6937.47	9050.43	1225.5	22428.1	9964.3	10667.1	12485.9	28850.8	2291.81	138.275	10941.7
Bradi1g32420.1	0.00633816	0.0105168	0.299329	0.937691	0.00227665	0.210877	0.00227665	0.938035	0.542246	0.819048	0.938035	0.542246	0.795378	MGVEVVVSGGGVVEAAAPAKEMVVSAKEEAAVVAKNPSFREESNLVGDLKESEKKALAELRAKVEAAIVEGKLFEDTSKVKAEEKKVGKKKESKKKAEPVEEKKAETVEEKEEEAAEEKKDEAAEEKKEETEEKKTEEEAEVAKEKKEGEEGEQEPAAVKEEAGDNGEKKEEEAAAVVKDEAADNGEAAAAVVVVDKEISLWGVPLLPSKGDEATDTVLLKFLRARDFKAGAAFEMLRRTLRWRREWRSLAATASDSDEELFPAAACFLDGLDREGHPVCYNDLGALADEAVYRKALGDEAGKARFLRWRVRAMDSHVAELDFRGAGGVTSLLQVTDLKNSPGPAKKDFRVAMKQLLDLFQDNYPELVARNILINVPFSYYAFSTLFYPFLTQRTKSKF…	289076	281583	430673	338566	334974	205914	326143	234084	331300	274360	309186	312270	311668	323747	314218	120745	152189	243313	210306	181638	254188	250104	308826	252606	266431
Bradi1g32490.1	0.00473203	0.00818399	0.025011	0.00154074	0.0140648	0.203681	0.00154074	0.812582	0.563177	0.70291	0.563177	0.674717	0.812582	MAALPLATAEVCDANSHLITNGELRALQPIFQVYGRRQVFAGPIVTLKVFEDNVLVREFLEEKGQGRVLVVDGGGSLRCAILGGNPVQQAQNNGWAGIVVNGCIRDVDEINGCDIGVRALNSHPMKANKKGMGEKHVPVTIAGTRICDGEWLYADTDGILVSRTELIV	20601.6	11755.6	13249.6	13489.8	14774.2	8891.72	10024	12150.3	10473.6	10384.9	8968.57	7249.61	7372.52	9691.17	8320.47	9190.66	10783.8	9772.36	10126.7	9968.38	12122.1	11707.3	13212.6	10978.9	12005.2
Bradi1g32770.1	1.72082e-06	1.16069e-05	0.000239697	5.0187e-08	0.121525	0.283303	5.0187e-08	32.8585	7.19108	20.3819	32.8585	9.00884	7.19108	MSVVGFDVGNDTLVAAAARQRGIDVLLNAESKRESPAAVAFAHNARLLGPHAAGAASSHAPFSSPKRLLLLAARPALVPRDLPRLPFPVHVPADGDALVHVDHIGRRIALSPTHLLAMLLAYLKQLAEADLEAPVADCVISVPCYFTQAHRRAYLDAAAVAGLTPLRLMHDLAATALGYGLYRSDLGVAGSPTFVAFVDVGHSDTQATVVAFDPSGMKVLSHGFDADLGGRDFDEVLFEHFAEEFRDRYKIDVVGNVKASMRLRAACEKAKKVLSANAEAVVNIECLMEEKDVRGMIRREEFEKLCSQLLERVVEPCKRAMADSGVGLEKLQSVELVGSGSRVPAIARVLAEFFRREPSRTINVSECVARGCALQCAMLSPTLRVREYEVQDAIPASIG…	536.973	261.473	0	0	199.611	5682.33	3451.04	3092.19	4048.28	4068.46	5925.66	6597.36	6304.35	7408.33	6558.93	1757.66	584.175	3459.61	1391.62	1798.27	581.299	0	2736.35	2424.04	1435.42
Bradi1g32830.1	0.000199345	0.000518145	0.100417	0.000977363	0.000967857	7.45337e-05	7.45337e-05	0.808378	0.513403	0.808378	0.615594	0.619429	0.513403	MSKRKTREPKEENVTLGPAVREGEFVFGVAHIFASFNDTFIHVTDLSGRETLVRITGGMKVKADRDESSPYAAMLASQDVAARCKELGITALHIKLRATGGNKTKTPGPGAQAALRALARSGMKIGRIEDVTPVPTDSTRRKGGRRGRRL	57329.2	58707	82696.6	63799.1	65633	40224.4	52223.6	55748.7	64028.4	53056.3	35253.7	44333.7	36953.8	45072	40403.3	45464.6	41035	38121.2	37999.2	40655	36484.4	28354.8	34643.4	35302	33696.2
Bradi1g32840.1	0.052555	0.0678437	0.742562	0.183652	0.979806	0.746234	0.183652	1.71936	0.656022	0.656022	1.71936	0.849771	0.658086	MASSRGGVARLLCLAMAAAAASAAQFRVGEQRGWSVPDGGAEPYNSWAGRMRFVIGDQLLFVYPKGSDSVLVVDAGAYGSCNTTAYTAKFEDGNTVVTLDRSGPFYFISGNEAGCKANQKLEVVVLAAAHTPPPAPVSPSPSSMPPSPASPPSSMTPPMASPPSPGPSSMTPPMASPPSPGPSSAPPMPAPAAGPGASAPAPSPTGAAAPADSPPAPGSPSSSSSPDGPGGPASPPGGSQGAGSTPGSGAASVTAGILGALAAGVGYAMLAV	75336.9	24154	24529.6	11431.7	33863	32490.6	30675.9	8271.86	17421.2	22214.9	59881	34887.2	66113.2	72009	58222.6	39127.8	40953.3	21756.5	13265.7	28775.8	27814	32734.8	11845.5	16744.9	22284.8
Bradi1g33200.1	0.167155	0.189171	0.90036	0.367226	0.212251	0.0911656	0.0911656	0.821716	0.366464	0.821716	0.588551	0.494316	0.366464	MAMRMPTTAVAVLLVAAAASLLASGAAAQTAGTPACASKLVACGPYMNGTDAEKPPDTCCDPLKEAVKNELPCLCALYAMPEIFKAFNIKLSDALRLSKRCGVSDTTSSCPSTSPTRSPPGSPSGGKNAGHRGISVSFAGLMSLFLVVWSVLA	7975.85	16815.3	26879.5	25906.2	19394.2	12357.6	19995.3	16314.4	15078.8	15936.5	10577	15396.6	19255.7	428.686	11414.5	7115.47	0	9774.26	21457.7	9586.86	11132.6	11796.6	1417.89	4082.02	7107.28
Bradi1g33210.1	0.0010574	0.00221151	0.812094	0.000285706	0.0623906	0.159305	0.000285706	1.87436	1.14021	1.14021	1.87436	1.4325	1.34642	MLLRASAIRRAAFSTVVAKSETGLYGFDVLRTAKGFRRFVDEAIQRSDELVAYIAQLPPSAEIVNAMDEISNTVCSVIDSAELCRNTHPDREFVEEGDKASMRIYEHLQYLNSNTTLYNAILKAESEGVLLSEEARKAAANLCADFEKWGIHLPKDKLERVNQLNLAIAQLGRKFNENVMNKPGFVDIYPASRIPRNMHHNFKPVSRFKPWGVEEASNAMHTTRQKGLRIVTDSGTVSSALRWVPDEEVRRQVYITGNSEPRENIAVLDELIDARDELGKTMGCKSYAEFAIRPNMAASVDVVMSFLRDLSDIVRHKADEEFNTIQEFKRRICNQKSADLEPWDEDYFIGMMKSSANSVDLSVVASYFPLAQCIKGLNVLVESLFGATFHQIPMGDGES…	16675.1	12437.4	18199.8	10615.1	14481.9	15473.3	16256.9	14360.4	19959.1	16512.4	30593.9	21936.7	28716.3	27330	27144.3	24274.8	19077.4	21737.9	17890.9	20745.3	20010.3	14214.4	24314.8	19455.3	19498.7
Bradi1g33310.1	0.00171955	0.00340627	0.998176	0.00731532	0.159964	0.00285386	0.00285386	2.55068	1.08216	1.08216	2.37736	1.77754	2.55068	MEIGGQYPGSSCSKEHQKIYQEWFAFADSDGDGRITGPDAIKFFAMSKLPRADLKQVWAIADSKRLGYLGFGEFVTAMQLVSLAQAGNEITQDSLKRDDLSSLNPPVTEGLDVLLAKSKHLAKRVDPDIDGFPQAQPPSTNHWFSSKSSKKIPLTAVTSVIDGLKKLYVEKLKPLEVTYKFNDFVSPLLTNSDFDAKPMVMLLGQYSTGKTTFIKHLLKTSYPGAHIGPEPTTDRFVVVMSGPDERTIPGNTLAVQADMPFSGLTTFGTSFLSKFECSQMPHPLLEHITFVDTPGVLSGEKQRTQRSYEFTGVTSWFAAKCDLILLLFDPHKLDISDEFKRVIGSLRGHDDKIRVVLNKADQIDTQQLMRVYGALMWSLGKVLNTPEVSRVYIGSFNDK…	28116.2	43473.8	31712.2	36246.9	34887.3	33104.4	50307.3	30803.4	36799.2	37753.6	64585	82009.7	84582.7	100582	82939.8	72956.2	37687	87638.7	49772.3	62013.6	99769.6	124810	70526.5	60838.6	88986.2
Bradi1g34170.2	3.4124e-07	3.26478e-06	0.00353746	7.10564e-08	7.40577e-08	7.83305e-06	7.10564e-08	0.841963	0.620912	0.841963	0.652764	0.620912	0.730409	MLRTMILKCRSCCNQGETEEFFTSYDEVHESFDDMGLQENLLRGIYAYGFEKPSAIQQRGIVPFCKGLDVIQQAQSGTGKTATFCSGILQQLDYGLVECQALVLAPTRELAQQIEKVMRALGDYLGVKVHACVGGTSVREDQRILASGVHVVVGTPGRVFDMLRRQSLRPDHIKMFVLDEADEMLSRGFKDQIYDIFQLLPGKIQVGVFSATMPPEALEITRKFMNKPVRILVKRDELTLEGIKQFYVNVEKEEWKLDTLCDLYETLAITQSVIFVNTRRKVDWLTDKMRGRDHTVSATHGDMDQNTRDIIMREFRSGSSRVLITTDLLARGIDVQQVSLVINYDLPTQPENYLHRIGRSGRFGRKGVAINFVTREDERMLFDIQKFYNVVIEELPANV…	923110	992411	1.10417e+06	1.04313e+06	1.0157e+06	750021	884928	869349	916442	855185	705955	685874	599637	660593	663015	650177	674670	609203	588599	630662	729634	745992	771951	719940	741879
Bradi1g34190.2	3.12453e-07	3.09926e-06	0.305141	0.000308505	4.89834e-06	1.52915e-08	1.52915e-08	3.60449	1.45464	1.45464	2.39335	3.07623	3.60449	MGWGTILSRRLKVFSLALFVYLDYKAVQKRVQWVSTVKKNAIWAKTHERNARRVLSLMIELEGLWVKMGQYLSTRADVLPEPYINVLKQLQDSLPPRPLEEVRGTIEKELGKPMGELFASFDIDPLATASIAQVHRATLENGREVVVKIQHDGIKEIILEDLKNAKSLIEWIAWAEPQYDFNPMIDEWCKEAPKELDFNHEAENTRTVSKNLSQKTEIGSGSVSSAVDVLIPEVIQSTDRILILQYMDGIRLHDNDSLEAYGVDKKKLVEEITRAYAHQIYIDGFFNGDPHPGNFLVSKEPPHKPILLDFGLTKRISESMKQALAKMFLSCAEGDQVALLSAFAEMGLKLRVDMPQQSMEIASIFFRQSTTAIEAKENIKALNEQRERNAKALQEKMKL…	4966.68	5344.13	3523.14	4389.48	4555.86	7482.3	5760.86	5924.61	7340.78	6627.14	10010.2	11741.7	9261.64	12601.5	10903.8	11627.6	13472.7	18541.9	12417.3	14014.9	16895	17870.9	14972.4	15948	16421.6
Bradi1g34200.1	5.09947e-06	2.58632e-05	0.000834758	6.47755e-06	9.53011e-06	2.81849e-06	2.81849e-06	0.601247	0.362005	0.601247	0.418174	0.362005	0.384692	MGVYTFVCRSSGGEWTAKQHKGELEASAATTYDLHRQLVAAASAADSSAGVQSSFTAVSPTSAICQVIIGAVGGGAMVGGPAAGGAPASGGAAAEAPKAEEKKEEEKEESEDDLGFSLFD	12372	15187.5	17624.4	12120	14326	7656.95	8058.65	10936.9	7801.29	8613.45	6617.29	4630.92	5347.17	7367.62	5990.75	3183.19	7143.67	5731.24	4686.18	5186.07	5197.77	6403.96	5267.99	5174.64	5511.09
Bradi1g34750.1	5.93646e-05	0.000187548	0.00456557	0.000176882	1.16874e-05	0.000375793	1.16874e-05	0.643148	0.389299	0.643148	0.483091	0.389299	0.52558	MALSGWRRSPAARRPASLCLWIALVAATLVLAQAKKSNADLSTVTHKVYFDIEIEGKPAGRVVMGLFGKAVPKTAENFRALCTGEKGTGKSGKPLHYKGSSFHRIIPSFMIQGGDFTLGDGRGGESIYGTKFADENFKLKHTGPGFLSMANAGRDTNGSQFFITTVTTSWLDGKHVVFGKVLSGMDVIYKVEAEGQQTGTPKSKVVIADSGELPL	111989	160248	132276	103688	127050	59607.8	77715.2	89052.2	100473	81711.9	56134	52120.3	62839	74413.8	61376.8	34551.6	43648.5	57451.3	62190.7	49460.5	66412.2	72567.5	52628	75492.3	66775
Bradi1g35090.1	0.697068	0.708091	0.732649	1	1	0.969765	0.732649	1.1042	0.949774	1.1042	1.00095	1.00206	0.949774	MGQCYGKGASSRAVEDELGVVPETHSPPPANGVPQTPPRPVAAAGTPRRRKSGSTTPVHQTPGVAWPSPYPAGTSPLPAGVSPSPARSTPRRFFKRPFPPPSPAKHIKATLAKRLGGGKPKEGTIPEEAGVVPPGGPGVVGDGADAERPLDKTFGFGKNFGAKYELGKEVGRGHFGHTCSAVVKKGEYKGQTVAVKIISKAKMTTAISIEDVRREVKILKALSGHNNLVKFYDACEDALNVYIVMELCEGGELLDRILARGGRYTEEDAKAIVVQILSVVAFCHLQGVVHRDLKPENFLFTTRDETAPMKLIDFGLSDFIRPDERLNDIVGSAYYVAPEVLHRSYSMEADIWSIGVITYILLCGSRPFWARTESGIFRSVLRADPNLDDSPWPSVSVEA…	181456	159791	236528	281679	214864	222061	261829	219776	245346	237253	193464	253151	194552	219101	215067	231045	172064	233786	224332	215307	207636	187564	222289	198799	204072
Bradi1g35630.1	0.00790856	0.0128229	0.165256	0.976943	0.0140216	0.0119886	0.0119886	0.936214	0.493113	0.696424	0.936214	0.504588	0.493113	MSLDVTQILLSAQSADGAIRKHAEESLKQFQEQNLPGFLFSLSSELASDEKPEESRRLAGLILKNALDAKEEHRKSELFQRWLALDAGVKAQIKALLLQTLSSPVANARSTSSQVIAKVAGIEIPQKQWPELIVSLLSSIHQVQPNVKQATLETLGYLCEEVSPEAVDQDQVNKILTAVVQGMNASEGNSEVRLAATRALYNALGFAQVNFSNDMERDYIMRVVCEATQSPEVKIRQAAFECLVAISSTYYDKLATYMQDIFNITAKAVKGDEESVALQAIEFWSSICDEEIDILDEYSSEFTADSDVPCYYFIKQALPALVPMLLETLLKQEEDQDLDEGAWNLAMAGGTCLGLVARTVGDDIVPLVMPFVEENITKPEWRQREAATYAFGSILEGPS…	54706.7	76875.7	98416.6	102513	83127.9	48040.8	62942.7	50453.3	70132.3	57892.3	57074	66297.1	97948.9	89981.9	77825.5	49648.4	31306.9	55794.4	31031.7	41945.4	21230.4	42000.3	66314.3	34421	40991.5
Bradi1g36230.1	0.00842524	0.0135428	0.142511	0.253383	0.376579	0.782824	0.142511	1.24977	0.790431	1.24977	0.790431	0.821113	0.896255	MGGVFGRHDSSKRSSHGSKLETKMVESMRQRAAHGTSVKSFNSIIMKFPKIDEGLRKCKTIFEQFDEDSNGEIDKDELKHCFQKLEISFTEEDITDLFEACDINEHMGMKFNEFIVFLCIVYLLNDPPASEAKAKMGLGNLESTFETLVDAFVFLDKNKDGYVSKDEMIQAINESIPGERSSGRIAMKRFEEMDWDKNGMVTFKEFLFAFTRWVGIGENEDDDE	6170.06	10655.1	9838.34	10414.5	9269.51	10875.4	12684.8	12457.8	10321.1	11584.8	5819.9	8774.47	6809.86	7903.39	7326.91	8150.99	6980.54	8296.22	7017.5	7611.31	8067.78	8123.88	6202.92	10836.8	8307.85
Bradi1g36260.1	0.00294541	0.00544296	0.552683	0.00954958	0.938964	0.367471	0.00954958	1.08188	0.765609	1.08188	0.765609	0.962023	0.897552	MSAFVGKYADELIKTAKYIATPGKGILAADESTGTIGKRLASISVENVESNRQALRELLFTTPGAVEYLSGVILFEETLYQKSSDGTPFVDILKAGNVVPGIKVDKGTVEIAGTDGETTTQGLDSLGARCAKYYEAGARFAKWRAVLKIGAAGEPSELAVKQNAEGLARYALICQENGLVPIVEPEILTDGGHDIKVCAAATERVLAAVYKSLNDHKVLLEGTLLKPNMVTPGSDSPKVGAEVIAEYTVAALRRTVPPAVPGIVFLSGGQSEEEATKNLDAMNKLAVGKPWTLTFSFGRALQQSTLKKWGGKKENVAAAQATFLARCKGNSEATLGKYAGAGAGGDAAASESLHVAGYKY	1.46705e+06	1.33178e+06	1.35706e+06	1.50757e+06	1.41587e+06	1.60095e+06	1.66435e+06	1.48388e+06	1.37803e+06	1.5318e+06	1.27394e+06	1.16152e+06	927114	973434	1.084e+06	1.364e+06	1.60592e+06	1.27183e+06	1.20663e+06	1.3621e+06	1.1857e+06	1.22421e+06	1.34789e+06	1.32545e+06	1.27081e+06
Bradi1g36400.2	0.76089	0.768294	0.986305	0.978041	0.785712	0.999999	0.785712	1.11861	0.719237	1.11861	0.864719	0.719237	0.989453	MAEGEEAANALRRLVITEYRKKLLACRELETKVRTARDSLKKSKKDYEKTEDDLKSLQSVGQIIGEVLRPLDSERFIVKASSGPRYVVGCRSKVDKEKLTAGTRVVLDMTTLTIMRTLPREVDPVVYNMLHEDPGNVSYSAVGGLSDQIRELRESIELPLMNPELFLRVGIKPPKGVLLYGPPGTGKTLLARAIASNIDANFLKIVSSAIIDKYIGESARLIREIFNYAREHQPCIIFMDEIDAIGGRRFSEGTSADREIQRTLMELLNQLDGFDELGKVKMIMATNRPDVLDPALLRPGRLDRKIEIPLPNEQSRMEVLKIHASGIAKHGEIDYEAVVKLAEGFNGADLRNVCTEAGMAAIRAERDYVIHEDFMKAVRKLNDAKKLESSAHYSADFGKE	3824.17	14906.8	18454.3	22555.5	14935.2	11858.6	19783.6	13947.5	21237.1	16706.7	13961.3	10636.6	20948.6	6112.53	12914.8	8060.44	7708.99	7967.51	19230.8	10741.9	11530.1	26572.2	8178.24	12830.2	14777.7
Bradi1g36420.1	0.242623	0.26653	0.856073	0.3228	0.989383	0.427009	0.3228	2.03142	0.780564	1.47977	2.03142	0.780564	1.9083	MGAACDGAVEQLARLMDQVEAPLKKSFQNVHQGYPTETLVRFLKARDWDATKAHKMLVDSLNWRIQNEIDSILEKPIVPLELYRSIRESQLVGLSGYSKEGLPVFGIGVGLSTYDKASVHYYVQSHIQINEYRDRIILPTATKKFGRPISTSIKVLDMTGLKLSALNLLKILTAISAVDDLNYPEKAETYYIVNAPYIFSACWKVVKPLLQERTRKKIHVLHGCGRDELLKIMDHSALPHFCRLEGSSKISLNDVNNCFSLDHPFHQELYHYIEQQALNQELVKQGSLHVDIPDQDLEDAKIVEVIKAEFHKLGEQNGSPMVTVNNSVV	43202.8	274152	79548.7	56052.5	113239	241652	57125.7	298045	73448	167568	310601	86890.5	291826	230829	230036	71410.4	88792.2	82635.4	110723	88390.3	269822	125626	115745	353184	216094
Bradi1g36580.1	0.0165852	0.0244251	0.654053	0.62948	0.0597661	0.520708	0.0597661	1.21454	0.564938	0.819138	0.813027	0.564938	1.21454	MAHRLLHGTLHATILEADKLTDPTRATGGAPGIFRKFVEGFEETIGRGKGSTRLYATIDLGRARVGRTRVIADDPVNPRWYEEFHIYCAHFAADVVFTVKADQPIGATLLGRAYLPVRDLLDAAGKEIERRLDVLDPGKKKLPHGPTIHVRLRFCDVAAAEGRREWGRGIGGLRFPGVPYTFFSQRPGCKVTLYQDAHTPDAFAPRIPLSGGRMYEQGRCWEDVFDAISDARHLVYVTGWSVYTEITLLRDGARPPRPGGDATLGELLKRKASEGVRVLMLVWDDRSSVESIGWKQGYMGTHDAETADYFRGTDVHCVLCPRNPDVGSSVVKGAQIAYMISHHQKIIAVDHDMPVRGGSTRRRIVSFVGGLDLCDGRYDTQFHSLFRTLDTAHHKDFHQ…	9738.47	21475.8	20186	16656	17014.1	10631.6	13925.8	12749.7	18440.5	13936.9	10675.8	12567.6	12872.2	19216	13832.9	10655.5	7787.86	10925.1	9079.14	9611.9	26391.6	22699.2	18612.5	14953.8	20664.3
Bradi1g36700.1	3.22063e-05	0.000114032	0.0323434	5.58237e-05	0.00017335	2.06888e-05	2.06888e-05	0.595816	0.073436	0.595816	0.168433	0.239619	0.073436	MEEVTEAVNNLAITEPHKKNRIQVSNTKKPLFFYVNLAKRYMQVHNEVELSALGMAIATVVTVAEILKNNGLAMEKKIMTSTVDVNDESRSRPMQKAKIEIVLGKTENFDELMAIAAEEREVAAAEEGEEQS	6275.1	10018.5	11823.7	12419.7	10134.3	4690.42	7329.49	5038.31	7094.42	6038.16	2877	1624.59	1164.43	1161.75	1706.94	6848.48	683.756	926.839	1254.39	2428.36	5.66956	626.701	1119.02	1225.49	744.22
Bradi1g36830.1	0.0281445	0.0386235	0.247097	0.0374391	0.0172141	0.0252445	0.0172141	0.552041	0.198569	0.552041	0.294548	0.198569	0.244015	MAAVEMAISKPSTLPGVDDPASSAAKGRAGGGEGLRQYYQQHIHDLQLQIRQKTHNLNRLEAQRNDLNSRVRMLREELQLLQEPGSYVGEVVKVMGKSKVLVKVHPEGKYVVDLDKSIDITKITPSTRVALRNDSYMLHLILPSKVDPLVNLMKVEKVPDSTYDMIGGLDQQIKEIKEVIELPIKHPELFESLGIAQPKGVLLYGPPGTGKTLLARAVAHHTDCTFIRVSGSELVQKYIGEGSRMVRELFVMAREHAPSIIFMDEIDSIGSARMESGTGNGDSEVQRTMLELLNQLDGFEASNKIKVLMATNRIDILDQALLRPGRIDRKIEFPNPNADSRGDILKIHSRKMNLMRGIDLKKIAEKMNGASGAELKAVCTEAGMFALRERRVHVTQEDF…	3918.49	32139.1	14516.9	14495.5	16267.5	4334.08	9946.65	9854.07	11786.5	8980.33	4581.5	3228.91	4512.78	6843.03	4791.56	2366.55	2892.98	1281.53	6379.82	3230.22	6255.64	874.534	4428	4319.86	3969.51
Bradi1g37360.1	0.0660625	0.0829008	0.407361	0.0320846	0.98067	0.938753	0.0320846	1.32471	1.04547	1.16346	1.32471	1.04547	1.0637	MPSHSDLDRQISQLRECKFLPDAEIKALCEQAKAILMEEWNVQPVRCPVTVCGDIHGQFYDLIELFRIGGDTPDTNYLFMGDYVDRGYYSVETVSLLVALKVRYRDRITILRGNHESRQITQVYGFYDECLRKYGNANVWKYFTDLFDYLPLTALIENQVFCLHGGLSPSLDTLDNIRSLDRIQEVPHEGPMCDLLWSDPDDRCGWGISPRGAGYTFGQDIAQQFNHTNGLSLISRAHQLVMEGFNWAQEKNVVTVFSAPNYCYRCGNMAAILEIGENMDQNFLQFDPAPRQIEPDTTRKTPDYFL	19046.6	24083.5	26242.2	25511.1	23720.8	26807.6	32304	24374.2	26907.1	27598.2	30077.5	31061.5	29668.5	34885.4	31423.2	23639.1	21173.8	27301.2	27083.4	24799.4	32818.5	21281	26235.1	20592.6	25231.8
Bradi1g37490.1	0.0004665	0.00107758	0.0299965	0.000134397	0.000750882	0.00387286	0.000134397	0.826762	0.670834	0.826762	0.670834	0.72287	0.768141	MALVLHSGSGNKNAFKALIAAEFCGVKVELAKNFEMGVSNKTPEFIKMNPLGKVPVLETPDGAVFESNAIARYVARSKGDSPLFGGSLIDYAHVEQWMDFSATEIDGNIARWLYPRLGYMPYVPASEEIGIAGLKRSLGALNTHLASTTFLVGHSVTLADITMTCNLYHGFARLLTKTFTSEFPHVERYFWTMVNQPNFKKVIGEVKQAEAVPPVQKKPAPAKEPKAKEVKAPKEAPKPVVDAAEEEAPKPKPKNPLDLLPPSKMVLDDWKRLYSNTKTNFREVAIKGFWDMYDPEGYSLWFCDYKYQDENTVSYVTLNKVGGFLQRMDLCRKYAFGKMLVIGTEAPFKVKGLWLFRGQDIPKFVMDEVYDMELYEWTKVDISDEAQKERVSAMIEDLE…	521966	658416	742152	673120	648914	482794	579266	508686	575243	536497	424477	439248	416344	461185	435314	439780	458902	493989	483650	469080	466541	450494	552052	524742	498457
Bradi1g37510.1	3.27313e-05	0.000115286	0.780108	0.415516	0.999709	1.51416e-05	1.51416e-05	2.35907	0.971621	1.1849	1.3028	0.971621	2.35907	MSSPSASSASGPSPADLLRHNRILSSKLYLDVPPSKVPVIYSVAYDIAFLGIEKLHPFDSAKWGRICKFLTKEGHLEKNRVVEPLEASKEDLLVVHTQSYLNSLKTSFRVATIMEVPPVSLIPNWLVQQKLLFPFRKQVGGSILSAKLALERGWAINVGGGFHHCSAEEGGGFCAYADISLCIQFAFDRLNISRVMIIDLDAHQGNGHEKDFADDGRVYILDMYNAGIYPFDHAAKRYIDQKVELVSGTKTDDYLDQLDQALEVAQTRFQPQLIVYNAGTDILDGDPLGRLEISPEGVVNRDEKVFRFAVDQNIPLLMLTSGGYMKSSARVIADSIINLSQKELIQLSSQLD	8243.88	10819.1	11554.4	9952.32	10142.4	11764.1	12810.5	10672.2	12824.3	12017.8	13052.3	14350.9	12936.3	12514.7	13213.5	9054.52	7274.16	11108.4	11981.3	9854.6	16112.1	24500.7	24523.3	30570.7	23926.7
Bradi1g37582.1	9.13019e-07	7.26885e-06	0.800857	0.0002468	3.46189e-06	8.26746e-06	3.46189e-06	0.93452	0.38081	0.93452	0.594686	0.38081	0.450114	MGLVKDGADMEEGTLEIGMEYRTVSGVAGPLVILDKVKGPKYQEIVNIRLGDGTTRRGQVLEVDGEKAVVQVFEGTSGIDNKYTTVQFTGEVLKTPVSLDMLGRIFNGSGKPIDNGPPILPEAYLDISGSSINPSERTYPEEMIQTGISTIDVMNSIARGQKIPLFSAAGLPHNEIAAQICRQAGLVKRLEKGKHAEGGGEDDNFAIVFAAMGVNMETAQFFKRDFEENGSMERVTLFLNLANDPTIERIITPRIALTTAEYLAYECGKHVLVILTDMSSYADALREVSAAREEVPGRRGYPGYMYTDLATIYERAGRIEGRTGSITQIPILTMPNDDITHPTPDLTGYITEGQIYIDRQLHNRQIYPPINVLPSLSRLMKSAIGEGMTRRDHSDVSNQ…	3.65989e+06	5.86729e+06	5.92251e+06	5.45952e+06	5.2273e+06	5.08362e+06	4.62815e+06	4.9301e+06	4.8982e+06	4.88502e+06	2.88941e+06	2.93977e+06	2.9923e+06	3.61293e+06	3.10861e+06	2.53426e+06	2.28343e+06	1.63991e+06	1.50483e+06	1.99061e+06	2.1057e+06	2.33741e+06	2.45386e+06	2.51456e+06	2.35288e+06
Bradi1g38010.1	0.0224208	0.0315388	0.210259	0.00907059	0.0272184	0.0466506	0.00907059	0.798738	0.624523	0.798738	0.624523	0.682019	0.711154	MADSKATSAVTLRTRKFMTNRLLSRKQFVLEVIHPGRANVSKAELKDRLSKVYEVKDPNCIFVFKFRTHFGGGKSSGFGLIYDNLEAAKKFEPKYRLVRNGLATKVEKSRKQIKERKNRTKKIRGVKKTKAGDAKKK	18533.3	25641.9	29725.2	20346.1	23561.6	18509.3	18097	24373.5	14298.5	18819.6	15779.7	14675.7	11903.5	16500.3	14714.8	18406.2	18548.3	10878.3	16445.1	16069.5	16316.6	16075.2	17235.6	17396.3	16755.9
Bradi1g38025.1	0.0470911	0.0615363	0.235322	0.867458	0.539045	0.406142	0.235322	1.30445	0.554892	0.554892	0.821085	1.30445	0.642555	MEKVWDSGRRMSRSIGRGMGMETWGVDEAFLHGGGSRGRAGADDDEEALRWAAIERLPTYSRMRTAILSAEAAASAAADQGDGNKQQQQYKEVDVRKLGAGERQEFIERVFRVAEEDNQRFLQKLRDRIDRVGIELPTVEVRFERLTVEARCHVGSRALPTLLNTARNMAEGALGLLGARLGRQATLTILKDVSGVIRPSRMTLLLGPPSSGKTTLLLALAGKLDPTLACSGEVAYNGFPLEDFVPQKTAAYISQTDVHVGEMTVKETLDFSARCQGVGTKYDLLTELARREKEAGIRPEPEVDLFMKATSMEGVESSLQTDYTLRQILGLDICADTIVGDQMQRGISGGQKKRVTTGEMIVGPTKVLFMDEISTGLDSSTTFQIVKCLQQIVHLGEAT…	163069	56302.9	66507.5	46923.2	83200.6	34832.7	37277.5	53491.3	59068	46167.4	75619.4	51101.5	69134.5	77403.4	68314.7	133695	103673	118184	78571.5	108531	73904.6	35545.1	50582.3	53811.6	53460.9
Bradi1g38190.1	0.31948	0.343958	0.880097	0.301637	0.988114	0.999496	0.301637	1.20353	0.956587	1.08644	1.20353	0.956587	1.01904	MASGYRAEDDYDYLFKVVLIGDSGVGKSNLLSRFTRNEFSLESKSTIGVEFATRSLQVDGKVVKAQIWDTAGQERYRAITSAYYRGAVGALLVYDVTRHATFENAERWLKELRDHTDPNIVVMLVGNKSDLRHLVAVQTDEGKAFAERESLYFMETSALESTNVEDAFAEVLTQIYRIVSKRAVEAGEDSASGPGKGEKINMKDDVSAVKKGGCCSS	8346.75	13661.4	10013.6	11068.7	10772.6	9173.39	10082.4	15078.6	12480.7	11703.8	12121	13496.7	13024.2	13218.9	12965.2	8672.56	11149.2	10127.3	11270.8	10305	13295.7	10121.5	11154.8	9339.08	10977.8
Bradi1g39090.1	4.86713e-06	2.50601e-05	0.000480617	0.00639757	3.87606e-06	6.21966e-07	6.21966e-07	0.747773	0.440576	0.651897	0.747773	0.519555	0.440576	MALHAPVLVLKDSLKRESGAKVHHANIQAAKAVADIIRTTLGPRSMLKMLLDASGGIVVTNDGNAILREIDIAHPAAKSMIELSRTQDEEVGDGTTSVIVLAGEMLHVAEAFIEKNYHPTVICRAYTKALEDALAVLDKIAMPVDVNDRGAMLGLVKSSIGTKFTGQFGDLIADLAIDATTTAGVDLGQGMREVDIKKYIKVEKIPGGQLEDSRVLKGVMFNKDVVAPGKMKRKIVNPRIILLDCPVEYKKGENQTNAELMKEEDWQVLLELEEEYIKNLCAQILKFKPDLVVTEKGLSDLAIHYLSKAGVSAIRRLRKTDNNRIAKACGAVIVNRPEELQESDVGTRAGLFEVKKIGDEFFSFIVDCKDPKACTVLLRGASKDVLNEVERNLQDAMSV…	34228.8	39961.6	45157.3	33489.2	38209.2	17619.6	27139	24556.2	30319.2	24908.5	27710.8	28851	26957.9	30767.6	28571.8	20824.8	19876.3	18524.9	20181.2	19851.8	19234.1	16358.8	15430.5	16312.7	16834.1
Bradi1g39097.1	0.000875282	0.00188619	0.323201	0.00970989	0.0472677	0.000263748	0.000263748	0.877178	0.590439	0.877178	0.735649	0.794833	0.590439	MGNLKECSGRRLDIKTDLGLPRRPELSPKQRKPGKPNRRDRRSEHPDIRLYGFAVDRGDRSGAEVFTELCEVKAREFLVELGLPDGVLPLPSVEEVGYNRATGFVWLRQGQSGGLTHTFDAIGKQVWYATEVTAMVERGRMHSMNGVKSKEMLIWVTISDIVVSPSGTKIVFRTPAGLGRAFPVSAFQLNPPAPEGEAKVSEEDAAAAATTN	58843.3	69078.7	71683.3	65222.1	66206.8	55125	55596.6	61227	60352.2	58075.2	44382	54773	44121.9	51543.2	48705	70334.2	49551.9	42575.4	48032.1	52623.4	42622.5	32544.2	37751.8	43446	39091.1
Bradi1g39167.1	0.00855231	0.013702	0.0711771	0.228523	0.996215	0.770014	0.0711771	1.2569	0.651792	0.651792	1.2569	0.963424	0.87438	MASSNSKSMERHHSIDAQLRLLAPGKVSEDDKLVEYDALLVDRFLDILQDLHGPHLREFVQDCYEVSAEYEGDRDAGRLEELGRRLTGLAPADAIVVASSFSHMLNLANLAEEVQIASRRRNKVSKRGDFADEASATTESDIEETLKRLVSGLGKSRQEVFDALKNQTVDLVFTAHPTQSIRRSLLQKHGRIRNCLTQLYAKDITADDKQELDEALQREIQAAFRTDEIRRTQPTPQDEMRAGMSYFHETIWKGVPKFLRRVDTALKNIGVDERLPYNAPLIQFSSWMGGDRDGNPRVTPEVTRDVCLLARMTAANLHFSQIEELMFELSMWRCNDELRVRAEELHRVSRKAEKHYIEFWKQVPPTEPYRVILGYVRDKLYYTRERSRHLLTSGFSDIP…	123080	108930	101208	73513.9	101683	70583.5	86181.7	39179.3	69159.8	66276.1	147837	114645	101736	147002	127805	105893	102400	98947.2	84614.6	97963.8	65643.9	79420.1	117934	92640.2	88909.6
Bradi1g40150.1	0.0569935	0.0730839	0.10311	0.0380268	0.966688	0.452854	0.0380268	0.931288	0.591813	0.667603	0.591813	0.931288	0.799771	MSDPAEETVGAPPPTPAAAAEGDLAPPLPVEQPADASPEKAVPPASSPDTTARSRGFRLLGEDTSVHKALGGGKTADVLLWKDKKTSAVVIGGATVIWVLFEVLDYHLLTLISHVMIGILAILFMWSKATTFIKKSPPVFPVVQLPEDVAVNVTRALRNDINRALHLFREIAMGHDLKKFLGVIAALWVLSEVGSCCNFLTLTYVVVLMVHSVPILYDKYQDKVDHFAGKAHTEACRHYEVLDTKVLSKIPRGPAKAKKQT	20386.9	20059.2	17685.2	9169.47	16825.2	11721.6	10349.5	11904.5	10954.5	11232.5	9226.7	9493.48	10867.1	10242.2	9957.36	13251.1	11517.5	16100	21807.7	15669.1	14891.4	9138.44	15201	14594.3	13456.3
Bradi1g42000.1	5.11394e-06	2.58632e-05	0.00126624	8.25771e-07	5.34799e-07	4.33711e-05	5.34799e-07	0.535048	0.20661	0.535048	0.20661	0.224664	0.361485	MWRLKVSEGGGPWLRSVNNFLGRAVWEFEPDLGTPEERAEVERVRREFTEHRFQKKESQDLLMRMQYAKQKHPQLDLPAIKLLDSAEVTEEIILTSLRRALSQHSSLQAHDGHWACDYSGILFIMPILVFALHVTGSLNAVLSIEHRREICRYIYNHQNEDGGWGTQVLGPSTMFGSCLNYVTLRLLGELDNTDALTKGRAWILSRGSASAIPQWGKIWLSVIGLYEWSGNNAIVPELWLVPHFLPIHPGRFWCFCRMVYMPMSYLYGKKFVGPITPTIFAIREEIYNVPYHEIDWNKARDTCAKEDLRYPRTLLQNVIWTCLNKCVEPVLNCWPINKLRDAALKNLIKHIHYEDEVTKYIGICPIVKALNMICCWSDDPNSDALKLHLPRIYDYLWLA…	287744	288907	189664	168901	233804	113199	104322	128912	153952	125096	42507.3	31974.2	36098	82645	48306.1	68922.8	32922.4	56479.9	51784.4	52527.4	101983	66062	77763.3	92257.8	84516.5
Bradi1g42310.1	0.149076	0.171444	0.267912	0.725925	0.911447	0.994744	0.267912	1.1844	0.49797	0.49797	0.721074	1.1844	1.08236	MARGRKRIEKLKLSALYSFALCGKSSSEDHSKIGTTGFSRVVYVNDPNRHEEEGFRYPLNEVATTKYTLVTFLPKSLFEQFRRVANFYFLVTGVLTLTRLAPYSAVSALLPLCVVIIATMVKEGVEDWRRKQQDHELNNRIVKVHRGNGIFEETKWKYIKIGDVIKVEKDNFFPADLILLSSNYPDGICYVETMNLDGETNLKIKQALEVTLDLQDDTSFRNFRQIIKCEDPNANLYSFIGTMEWNNMQHPLSPQQLLLRDSKLRNTDYIYGAVIFTGHDTKVMQNATDPPSKRSKIEKKMDKIIYLLLCSLLVIALLGSVFFGIWTKDDLRNGEPKRWYLRPDDSTVFYDPKRAALASFFHLLTALMLYNYFIPISLYISIEMVKILQALFINQDIEM…	3874.21	1118.22	1231.79	754.184	1744.6	754.679	764.131	773.063	1183.17	868.761	1258.45	1119.11	1486.18	1168.21	1257.99	1747.48	2444.86	1703.89	2368.98	2066.3	2306	1441.73	2119.07	1686.34	1888.28
Bradi1g42760.2	9.15077e-06	4.04734e-05	0.999946	0.963215	0.000397656	5.4991e-05	5.4991e-05	253.575	4.59043	4.59043	20.8099	210.399	253.575	MIHLLVQEKAILETRPVLRKAVEELYTSLPPRSTMVVADLGCSSGPNTLLVVSEVMGAIRAYTDNKNKWEEEEEAQRAIELQFFLNDLPGNDFNLVFRSLEHFENLGVRLGEKEMPPYYVAGLPGSYYRKLFPCGSVHLFHSSYSLMWRSKVPEEISSGTHLNEGNIYIGETSPPAVIELFQEQFQKDFELFLALRSEELVSGGRVLLTFLGRKSEEMMMHGDVSTLFELVAKSLRSLVLKGRVEKEKLDSFNLPYYTPSVKEVKALINENKLFNIEDIRLFESNWDPQDDSEGDVVLDCARSGANVAKCIRAVLEPMIIDHFGEDIVDELFMLYASIVAKHMKKAKAKYPIILVSLKKATGRMV	124.25	0	0	121.567	61.4544	92.2625	0	860.472	175.674	282.102	1720.62	1320.61	1397.87	676.339	1278.86	19460	6901.45	10007.1	15351.3	12930	10079.7	13305.5	22604.4	16343.6	15583.3
Bradi1g43410.1	1.18912e-06	8.82491e-06	0.80372	0.0639312	0.000334138	0.000257513	0.000257513	2.53708	0.252203	0.752137	0.252203	2.50125	2.53708	MPTSGDGPTSQPHVVLLPSAGMGHLVPFSRLAVALSSAHGCDVSLVTVLPTVSSAESSHLEALFGAFPAVRRLEFHLADFDASEFPNADPFFLRFEAMRRSAPLLLGPLLARASATALVTDIALSSVVIPVAKQLRLPCYVLFTASAAMLSLCVHFPAYLDANGNGLVGDVDIPGVYQIPKASVPQALHDPKHLFTRQFVANGRELAKSDGVLVNSFDAFEPEAIAALREGAVSAAGFFPPVFSVGPLAPVSFPAGNNNRADYIQWLEAQPARSVVYVSFGSRKAVARDQLRELAAGLEASGHRFLWVVKSTVVDRDDDADLGELLGEGFLERVQGRGMVTKGWVEQEDVLKQESVGLFISHCGWNSVTEAAAGGLPVLAWPRFGDQRVNAGVVARSGL…	16502.3	15813.9	6689.47	9789.75	12198.9	5822.4	4062.08	16980.1	9836.3	9175.21	2895.99	3437.82	3184.52	2788.04	3076.59	27762.2	35082.7	29627.1	29577.5	30512.4	23792.4	41698.4	29532	28775.1	30949.5
Bradi1g43430.1	0.00125725	0.00257365	0.371088	0.450812	0.00227464	0.00158457	0.00158457	2.08573	1.33705	1.37101	1.33705	2.03062	2.08573	MSEESGRPLPKFGEWDVNDPASADGFTVIFNKARDEKKAGNGQDTESPCKDTRTERVESYAAKTNSKKWFCCVTPSPTQS	64491.2	66921.1	74019.1	80737.2	71542.1	88447.9	96101.3	102773	105018	98085	76688.2	98303.6	82422.5	125207	95655.4	99672.4	196066	126661	158699	145275	174063	157569	149616	115623	149218
Bradi1g44137.1	0.000879207	0.00189163	0.00254013	0.000451567	0.00185649	0.00132541	0.000451567	1.48001	1.40653	1.40653	1.48001	1.42365	1.43781	MSVSCGLECVLCVGCVRWAWKRLTYIGAYDSETWPPAAPDDFEPVPRICRIIIAISDPDLSNPKLAPPGRGYADIDPDGFVRRTTYADVGNTCPPYVVYADKRRKEVVLAVRGLNLVRNADYKVLMDDKLGKQMFDGGYVHHGLLKAAQFILERETETLRELLRQQGPDCKLLFAGHSLGSGIAALMTVLVVNNRREFGNIPRSHIRCYALAPARCMSLNLAVKYADVIYSVVLQDDFLPRTPTPLQYIFGSIFCLPCLIFLVCLRDTFKQDKKKFKDPRRLYAPGRMYHIVERKFCRCGRFPPEVRTAIPVEGRFEHIVLSCSTTSDHAIFWIERESAKALELMKENEKATTPPAQQKMERLQSFEEEHKSALQRAKTLDVPHAVDISEEETHEGALP…	29148.1	26491.3	37389.4	35437.2	32116.5	47078.6	49804.9	45683.3	38124.2	45172.8	41093	50855.2	47182	51000.3	47532.7	45318.5	48176.4	44396.5	44999.6	45722.7	44495.9	52691.4	43603.7	43918.9	46177.5
Bradi1g44200.1	0.000220182	0.000561484	0.389754	0.0269626	0.00207947	4.28363e-05	4.28363e-05	1.99229	1.24979	1.24979	1.50122	1.70956	1.99229	MALLHALRGAAKPLAVVLTAVVFCVLRTGIKKESEADVYNSELTPLQRHVAFFDRNKDGIIYPSETYEGFRAIGCGVALSAFSAVFINGLLGPKTIPENEKAAAFKFPIYVKNIHKGKHGSDSGVYDSHGRFVPEKFEEIFKKHAHTRPDALTGKELQELLQANREPNDLKGRVGGFTEWKVLYSLCKDKEGYLHKETVRAVYDGSLFVKLEQERKEAKESAKKK	18442.9	14334.9	17394	17780.3	16988	21509.1	27939.3	18449.9	17027.4	21231.4	25972.5	29387.7	24437.3	22213.7	25502.8	32657.7	32601.9	29492.1	21416.4	29042	38424.8	31041.5	35378.3	30535.5	33845
Bradi1g44460.1	6.93376e-06	3.23655e-05	0.00159979	7.21447e-05	6.59693e-06	1.20015e-06	1.20015e-06	0.56195	0.23667	0.56195	0.405709	0.26972	0.23667	MAAAAVASNGGAANAPAPGRLASVYSEVQTSRLTHMLPLPSVLRSHFTLADGPASSAAGNPDEIAKLFPNLYGQPSASVVPSAEPVPAKPLKIGVVLSGGQAPGGHNVICGIFDYLQERVKGSTMYGFKGGPAGVMKGKYVELTSDFVYPYRNQGGFDMICSGRDKIETPEQFKQAEDTVNRLDLDGLVVIGGDDSNTNACLLGEYFRGRNLKTRVIGCPKTIDGDLKSKEVPTSFGFDTACKIYSEMIGNVMTDARSTGKYYHFVRLMGRAASHITLECALQTHPNVALIGEEVAEKKETLKNVTDYITDIICKRAELGYNYGVILIPEGLIDFIPEVQKLIAELNEILAHDVVDEAGAWKSKLQPESRQLFDFLPKTIQEQLLLERDPHGNVQVAKI…	61529.4	104557	118371	76013.6	90117.8	46896.5	43145.1	51924.7	60600.4	50641.7	33862.6	39280.9	33286.3	39816.7	36561.6	25278.8	27682.3	24757.6	19507.6	24306.6	24718.8	18437.4	26057.7	16098.9	21328.2
Bradi1g44630.1	6.36268e-05	0.000199148	0.0390354	6.74725e-06	0.0378787	0.00158788	6.74725e-06	0.792743	0.476901	0.792743	0.476901	0.791596	0.676647	MADLAAMPNSGEQQGRDAPAPPHLVFVPSAGMGHLLPFTRFIADLANENVEISVVTALPTVSAAEAAHFADLFAAFPRIRRIDFNLLPFDESAFPGADPFLLRWESLRRSAQLLGPLIAAAVPRASAVVTDVTLASQVIPIAKDELNLPCHILFISCATMLSLVAYFPVYLDGAKADHLVGDVDIPGVLRLPVSSPPQVLRNPDSLFTKQFIANGRTIAKSDGILVNTFRALEPEALSALNSGKVVPGFPPVYAVGPLKSSITMTTSTGSSDKDEGAAAGGSPMAWLGEQPAGSVVYVAFGNRHGVSLEQIREIAAGLEASGCGFLWVLKTTVVDREDTAELEDVLGRGFLGRVTGRGLVTKEWVDQEAVLQHPAVGLYLSHAGWNSVTESAAYGVPML…	628740	783026	765275	717420	723615	464210	472283	682119	675953	573641	348573	337020	272298	422480	345093	566215	659308	558673	507048	572811	468590	496544	500112	493282	489632
Bradi1g45380.1	0.000959479	0.0020224	0.0362382	0.00643024	0.00063293	0.00065306	0.00063293	1.82238	1.47693	1.47693	1.62112	1.82238	1.80311	MAGGKEPIEVKFRLFDGTDIGPSKYDPSTSVTSLKEFILARWPQDKEVVPKTVNDVKLINAGRILENNKTLAESRVPVGEVPGGVITMHVVVRPPQSDKSEKQLSNSPKQNRCGCTIL	24445.5	20054.1	29111.5	27899.9	25377.8	32486.1	37452.9	45539.2	34446.4	37481.1	37666.2	52424.2	30438.2	44033.2	41140.4	46318.4	44762.9	45367	48543.6	46248	37884	50857.2	44647.8	49646.3	45758.9
Bradi1g45400.1	0.266279	0.290153	0.234852	0.809465	0.770532	0.993717	0.234852	1.10562	0.356979	0.356979	0.705366	0.683129	1.10562	MAAALAWRFNGTNGSSHGGADLERHVDKVQDSEPPTPVSVMRMGKNRVNMEDEETLSSVAQCIEQLRQSSSSSQEKESSLKQLLDLIQARDTAFGAVGSHPQAVPILVSLLRSGSSGVKMLAATVLGSLCKEEELRVKVLLGGCIPPLLALLRSKSAESQTAAAKTIYSVSQGGIRDHVGSKIFSTENVVPVLWEQLKVSLKNESLVDSLLTGALKNLSKNTEGFWSATVQCGGVDILIKLVGSGQTNTLANVCNLLGALMMEDSSVCSKVLSGETTKQLLKLLGPGSETSIRAEAAGALKSFSAQSKEARRQIANSNGIPALINATIAPSKEFMQGESAQALQENAMCALANISGGLSYVISSLGESLESCSSPAQIADTLGALASALMIYDTNAEST…	59498.1	26698.4	24590.3	17549.5	32084.1	5741.56	10222	13763.9	16086	11453.3	14144.7	16188	37062.1	23129.2	22631	15345.9	4259.33	43795.8	24269.1	21917.5	30706.2	60072.3	43013.3	8099.58	35472.9
Bradi1g45487.1	0.00669408	0.0109858	0.996748	0.0918778	0.0128276	0.0724693	0.0128276	1.03955	0.472624	1.03955	0.629353	0.472624	0.609446	MATLTVPSSVPAITDDCEQLRKAFQGWGTNEALIISILGHRDAAQRRAIRRAYAETYGEELLRSITDEISGDFERAVILWTLDPAERDAVLANEGAKKWHPGSPVLVEIACARGSGQLFAVRQAYHERFKRSLEEDVAAHVTGAFRKLLVPLVSSYRYEGPEVNTRLAHSEAKILHEKIEHKAYGDDEIIRILTTRSKAQLLATFNHYNDAFGHPITKDLKADPKDEFLKTLRAVIRCFTCPDRYFEKVIRLAIAGTGTDENSLTRIITTRAEVDLKLIKEAYQKRNSVPLERAVAGDTSGDYESMLLALLGKE	94195.9	122769	169149	190242	144089	107715	129138	202847	159451	149788	69396	76594.3	86681.4	130060	90683	50003.4	59736.9	66782.1	95878	68100.1	102186	92565.7	88716.5	67790.2	87814.6
Bradi1g45710.1	0.171219	0.193122	0.992475	0.295603	1	0.197723	0.197723	1.52538	0.996986	1.08567	1.45777	0.996986	1.52538	MGSGGAWLLASSAALLVIASCALTASAAKYTVGDTSGWTTGTDYTTWASDKKLKVGDSLVFTYAGGAHTVAEVSAADYASCSSSNTLSSDASGATTVALKTAGKHYFICGVAGHCSNGMKLAVDVAAAAAAAPAPKASPTPDTTPDTTPTTPSSSGGVTPKTPATVLAPPTAKQSASGTTGLRATALAGLGVAGLVAAVQLGLF	19879	19303	43768.1	57388.2	35084.6	42252.3	59036	24367	26705.8	38090.3	46691.2	59130.8	46826	51933.3	51145.3	45729.2	31105.9	30220.5	32859.8	34978.9	66640.1	55575	57505.8	34349	53517.5
Bradi1g45833.1	3.44484e-05	0.000120704	0.992015	6.8468e-06	0.115407	0.0145293	6.8468e-06	2.8757	1.08885	1.08885	2.8757	1.62154	1.91969	MADTRGGWSWDVPGFQPAASASASAAAMPLAPPTAMPRAPPTAMVARSSEGPPRAAGAMPVADRLDQLADSVQLAREDCLELRQEASDLLEYSNAKLGRVTRYLGFLADRTRKLDQAALETETRITPLIHEKKRLFNDLLTLKGNVKVFCRSRPLFEDEGPSAVEFPDDLTIRVNTGDESLTNPKKDYEFDRVYGPHIGQGELFHDVQPFVQSALDGYNISIFAYGQSRSGKTHTLEGSSHDRGLYLRCFEELFDLSNSDTTSTSHFNFYFTACELYNDQVWDLLSESRSTVPKVRMGVQQSFVELVQEKVENPLEFSGALKMALQNQSVNSMKTIVSHLIITIHIHYRNCVTGEHLYSKLSLVDLPASECLLEEDANRDNVTDLLHVSKSLSALGDAL…	181217	99536	114400	95296.5	122612	95933.6	148275	126216	163602	133507	339896	257481	433904	379105	352597	152381	160491	256082	226328	198821	224083	270468	239341	207617	235377
Bradi1g45910.1	2.07325e-07	2.27595e-06	0.000414429	2.57744e-10	0.00789184	0.222099	2.57744e-10	4.35924	1.58205	2.59027	4.35924	2.13199	1.58205	MEVITRRPASPPSLPRRGEFRFDDSVYATAPCSPHRRLPSLTAPPSPDPFDLLPPPSDTPRHTGANPFDLFQHFTSAPASPRRAAAIYAHFADANRDDGAHEDDKDDDEEEFQQRSSYSTAASAVPFDWEETPGTPKAGIGMGGAPAWDDADAEDTGDFEFGTVVDKAAPAESTLTTADELFEKGRIRPLKPLMKTPSDMSDKGSSSGKMMRPLKPPPGLLDGGGPSVGSSPRSPMAVLRSPRRRSRVGSGTDFDPFAAALLEASKAAPVPSLSPLGTTKEANGMVKPKTMTASKSAGWRRWRLSDLLLFRSSSEGGRINRDSVFRCSPAKANGKVGSVDDKPKMKQGGAAVADGVVGCARLSPLQRLARGLGGHSWHHGRGMAATGTKG	4130.98	2347.58	5238.67	5988.43	4426.42	13528	12939.1	9467.49	9927.92	11465.6	19088.4	20149.1	17986.8	19958.9	19295.8	10840.8	8881.96	10780.3	7245.3	9437.09	9551.3	9205.04	5306.13	3948.73	7002.8
Bradi1g46670.1	5.58942e-06	2.74187e-05	0.000708037	6.80614e-05	2.63225e-06	9.50023e-06	2.63225e-06	0.534733	0.239755	0.534733	0.423231	0.263052	0.239755	MAAKLTRLHSLRERLGATFSSHPNELIALFSRYVHQGKGMLQRHQLLAEFDALMDGDKEKYAPFEDILRAAQEAIVLPPWVALAIRPRPGVWDYIRVNVSELAVEELTVSEYLAFKEQLVDEHASSNFVLELDFEPFNASFPRPSMSKSIGNGVQFLNRHLSSKLFQDKESLYPLLNFLKAHNHKGTTMMLNDRIQSLRGLQSALRKAEEYLISIPEDTPCSEFNHRFQELGLEKGWGDTAKRVHDTIHLLLDLLEAPDPANLEKFLGTIPMMFNVVILSPHGYFAQSNVLGYPDTGGQVVYILDQVRALENEMLLRIKQQGLDITPKILIVTRLLPDAVGTTCGQRLEKVIGTEHTDILRVPFRTEKGILRKWISRFDVWPFLETYTEDVANELMREM…	65842	92979.5	121466	100149	95109.1	35972.9	69128.6	40620.5	57709.9	50858	45757.5	44605.2	37512.3	33137.4	40253.1	29823.3	19540.3	23610.4	27100.6	25018.7	19983.2	26817.8	23652.9	20757.7	22802.9
Bradi1g46840.2	7.01872e-06	3.25369e-05	0.0167913	0.195475	3.01637e-06	6.64483e-05	3.01637e-06	0.895447	0.592831	0.825691	0.895447	0.592831	0.656899	MVKGRTGQRVRLYVRGTILGFKRSKSNQYESTSLVQIEGLNTKEDVSWYAGKRMAYVYKAKTKSSGTHYRCIWGKVTRPHGNSGVVRAQFKSNLPAESMGRKVRVFMYPSSI	80474.7	71268.3	92961.3	80158	81215.6	67028.5	68014.8	66018.1	67174.5	67059	68336.3	81103.8	71407.2	70049.7	72724.2	52029.9	43008.8	46037.6	51512.3	48147.1	48809.7	45525.6	60816.3	58250.2	53350.5
Bradi1g47140.1	0.00121529	0.00250294	0.0185032	0.000148377	0.0186622	0.032565	0.000148377	3.28442	2.20456	2.31937	3.28442	2.31891	2.20456	MASSTATAAAFAYLLPAAQGSSSRLPKAAAASFARLPAHSAAAVSVGAPRRRRWAPGVAYATAATEKSIYDFTVKDIDGKGISLSKFKGKPLLIVNVASQCGLTTANYTELSHLYEKYKTQGFEILAFPCNQFGFQEPGSNSQIKQFACTRFKAEFPIFDKVDVNGPNTAPIYKFLKSSAGGFLGDLVKWNFEKFLVDKNGKVVERYPPTTSPFQIEKDIQKLLAA	3728.34	3004.9	7095.16	5548.57	4844.24	7242.73	15613	12131.2	9955.4	11235.6	15807	16671.5	14240.8	16922.7	15910.5	14590.3	11296.1	9674.08	9373.07	11233.4	8346.31	6462.1	12674.6	15234.6	10679.4
Bradi1g47170.1	0.366651	0.390998	0.993428	0.662789	0.385659	0.991969	0.385659	1.06247	0.690914	1.06247	0.781144	0.690914	0.934085	MRTPFRPSATPDAHSVDHLPRASSPDANPLLHRLLPACTTLPSLRALHARLLAHGLLRGLRAHTKLLSCYAALGDLASARRVLDETPHPDAYTYKVALGWHAAAGRHAEAVAVHRDMRRRCPAEQEDVVVLSLALKAAVRSADFGYGRRLHCDVVKAGGGDLFVMNNLVDMYAKGGDLKNARKVFDRIPDRNVVSWTSMLSGCLQNGLAKEGLVLFNEMRQESILPSEYTMASVLMACTMLGSLHQGRLIHGSVMKHGLVSNHFITAAMLDMYVKCGEAEDARQVFDELSFVDLVLWTTMIVGYTQNGSPLDALLLFVDDKFMRIVPNSVTIATVLSASAQLRNLSLGRSIHGISVKLGAVENDVVMNALVDMYAKCKALSDAKGIFGRVLNKDVVTWN…	8681.4	7527.44	3989.58	4469.14	6166.89	7491.72	5194.05	7588.86	5934.02	6552.16	6345.04	5111.85	3910.83	3901.19	4817.23	3758.17	6704.61	3263.15	3317.22	4260.79	8589.88	6433.44	4009.07	4009.21	5760.4
Bradi1g47540.1	1.12772e-06	8.54662e-06	0.999707	0.80283	0.84328	9.08115e-08	9.08115e-08	9.87376	0.855486	0.855486	1.90066	1.82667	9.87376	MRCHLDCTRIAHAVGVIEAEEKAAECMIQALRRRFGVQFNDVNWTHLNRCHRRFTMARNSLRTMVERFSDLLEKARLMEKGWEQALADIKAAHDVCADISSRGGDTIDLSGSPTRQDETLFGMHSLSTWTDERFEEGKIALTAARGSTSS	149.46	356.483	3856.26	1650.1	1503.07	1213.13	210.098	3058.44	661.766	1285.86	4695.12	0	3558.95	3173.28	2856.84	2617.61	1405.21	4189.16	2770.51	2745.62	9161.68	16330.9	17736.7	16134.8	14841
Bradi1g47767.1	2.3535e-05	8.62736e-05	0.0166445	0.00219849	2.86179e-05	1.1152e-05	1.1152e-05	0.678827	0.292997	0.678827	0.580283	0.368434	0.292997	MAILSALGTEVFIPVAAVIGIVFAVVQWVLVARVKVTPGAAGATGAKNGYGDYLIEEEEGLNDHNVVVKCAEIQTAISEGATSFLFTMYQYVGIFMIIFAVLIFLFLGSIEGFSTKGKPCTYSKDKICKPALYTALFSTASFLLGAITSLVSGFLGMKIATYANARTTLEARKGVGKAFITAFRSGAVMGFLLSSSGLVVLYITINVFKVYYGDDWEGLFESITGYGLGGSSMALFGRVGGGIYTKAADVGADLVGKVERNIPEDDPRNPAVIADNVGDNVGDIAGMGSDLFGSYAESSCAALVVASISSFGINHDFTGMCYPLLVSSVGIIVCLLTTFFATDFFEIKAANEIEPALKKQLIISTALMTVGVAIISWLALPAKFTIFNFGTQKEVANWG…	105593	154867	141567	106511	127135	96905.7	75205.8	84396	88701.8	86302.3	62559.8	64400.5	67054.4	101081	73773.9	71742	59291.7	30040.1	26289.2	46840.7	41465.5	34960.7	34831.3	37742.8	37250.1
Bradi1g47920.1	0.57678	0.593498	0.499727	0.801455	0.816275	0.347168	0.347168	0.927886	0.862459	0.885587	0.925711	0.927886	0.862459	MAGGGTQQSLRKYLGALKDTTTVSLAKVNSDYKELDIAIVKATNHSERPSREKYIREIFHSISAARPRADVAYCIHALARRLSKTRNWAVALKTLIVIHRALREVDPTFREELINYGRSRSHMLNMAYFKDDSSAGAWDYSAWVRTYALYLEERLECFRVLKYDVESDPPRTRELDTVGVLDHLPPLQQLLFRLLACQPQGASSYNIIIQHALSMVALESVKIYTAISDGTINLVDKFFEMQRNDAVRALDIYKRATNQSERLSEFYEVCKTIHVGRGEKFLKIEQPPASFLQTMEEYVRDAPAMKDKAVLAIEYKKEPEEEVKLSSPPPASEPEVEQEPEPEPEPEPVIEEAPAAEPTDLLGLNETNPSVAELDEKNALALAIVPIDDAPRSAPAFPE…	242345	227138	247537	220804	234456	204125	212351	204047	210001	207631	219896	219182	219566	209511	217038	158683	180399	280903	250208	217548	222232	175109	190105	221389	202209
Bradi1g47940.2	3.9033e-05	0.0001323	0.546284	0.0402964	3.9679e-05	6.00971e-05	3.9679e-05	0.847436	0.268251	0.847436	0.656126	0.26949	0.268251	MAILYAVVARGTAVLAEHSAAATNAGAVARQVLERLPDGGADSHVSYTQDRYVFHAKRTDGITALCMADDAAGRRIPFAFLEDIHGRFVKTYGRAALTALAYAMNDEFSRVLSQQMDYYSNDPSADRINRMRGEISQVRSVMIDNIDKVLERGDRLDLLVDKTANMQGNTVRFRRQARRYRSSVWWRNVKLTAALILLLLVIIYIALFFVCHGFTLPTCIR	34646.1	80672.6	67807.7	55198.5	59581.2	46242.2	50076	48179.6	57467.2	50491.2	28657.1	39887.4	38792.9	49033.8	39092.8	19298.4	19482.1	13362.4	12083.2	16056.5	9213.72	17310	15177.6	22229.6	15982.7
Bradi1g48010.1	2.48972e-06	1.54776e-05	0.000370161	3.01041e-05	9.99647e-08	1.94167e-05	9.99647e-08	0.528663	0.218399	0.528663	0.382668	0.218399	0.260463	MSSPAPQAAAAAAPMAVDDAEDDQLASMSTEDIVRASRLLDNEIRVLKDEVQRTNLELESLKDKIKENQEKIKLNKQLPYLVGNIVEILEMNPEDEAEEDGANIDLDSQRKGKCVVLKTSTRQTIFLPVVGLVDPDTLKPGDLVGVNKDSYLILDTLPSEYDSRVKAMEVDEKPTEDYNDVGGLEKQIQELVEAIVLPMTHKDRFQKLGIRPPKGVLLYGPPGTGKTLMARACAAQTNATFLKLAGPQLVQMFIGDGAKLVRDAFQLAKEKAPCIIFIDEIDAIGTKRFDSEVSGDREVQRTMLELLNQLDGFSSDERIKVIAATNRADILDPALMRSGRLDRKIEFPHPSEEARARILQIHSRKMNVNPDVNFEELARSTDDFNGAQLKAVCVEAGML…	17538	35900.2	30692.7	27413.7	27886.2	14009.2	15534.8	13610.7	15814.8	14742.4	10162.6	11327.8	11444	9750.15	10671.1	4112.37	7732.21	6226.42	6290.21	6090.3	8940.19	6961.22	5833.51	7318.36	7263.32
Bradi1g49140.1	0.000360299	0.000863309	0.933121	0.0814454	0.641046	0.00866592	0.00866592	1.61011	0.583436	0.899434	0.583436	1.18804	1.61011	MRLDVSALENHHFAAPGNEFGGGVFAADTEELAMEFPTCNDQFDGFQKATKDMVNNKKGTTTLSFIFDKGVIVAADSRASMGGYISSQTVRKIIEINPYMLGTMAGGAADCQFWHRNLGTKCRLHELANKRRISIAGSSKMLANILYSYRGMGLSIGTMIAGFDETGPGLYYVDSEGARLKGNRFSVGSGSLYAYGILDEGYKFNMSVEEAGELARRAIYHATFRDGASGGCVSVYHVGPNGWKKLSGDDVGELHYHYYPVQAAPVEQEMADAPSAST	7586.43	6368.7	7509.46	7077.54	7135.53	4387.08	5584.34	9012.01	6688.33	6417.94	5880.19	4968.48	2202.16	3601.68	4163.13	7282.54	11483	6567.18	8576.52	8477.31	13022.3	10283	12945.2	9705.47	11489
Bradi1g49160.1	0.0421063	0.0554702	0.246317	0.581395	0.0455838	0.995226	0.0455838	1.89833	0.908264	1.59118	1.38962	1.89833	0.908264	MPEADADGAVEVVSPRSGYFRQRSMHAPATDPDRKAFDVENPPGTTAAASAAAGGGGGGLRPSESVAKLESLERAERAALAPAVVLKTGFYILVWYTFSTCLTLYNKTLLGDKLGKFPAPLLMNTVHFALQAALSKIIMLFQAKGLDAAVDMGWKDYLMRVVPTALGTALDINLSNASLVFISVTFATMCKSASPIFLLLFAFTFRLESPSIKLMGIIVVISIGVLLTVAKETDFDFWGFIFVTLAAVMSGFRWSMTQILLQKDSYGLKDPITLMSHVTPVMAIATMVLSLLLDPWSDFRKNAYFDNPWHVMRSFLLMLIGGSLAFFMVLTEYILVSATSAITVTIAGVVKESVTILVAVFYFHDEFTWLKGFGLITIMVGVSLFNWYKYEKFKKGHIN…	21988.4	33826.3	24342.8	34855.7	28753.3	35041.4	45392.7	52237.7	50335.5	45751.8	42555.5	61297	31110.2	24861.4	39956	61522.8	77074.1	36986.5	42749.2	54583.1	32467.1	41617.3	15368.2	15009.7	26115.6
Bradi1g49270.1	0.0195277	0.0280243	0.0409361	0.0060058	0.0385641	0.0523265	0.0060058	0.7743	0.683578	0.763189	0.683578	0.760978	0.7743	MSWQAYVDEHLMCEIEGNHLTAAAILGQDGSVWSQSDNFPQFKPEQITAIMKDFDEPGTLAPTGLFFGSEKYMVIQGEPGVVIRGKKGPGGITIKKTGQALLVGIYDEPMTPGQCNMIVERLGDYLVEQGM	97210.5	133465	144096	110318	121272	68707.4	96948.5	94760.9	109798	92553.7	76237.5	84775.9	72422.8	98160.4	82899.1	90645.5	98754.9	82096.8	97645.6	92285.7	80261.2	99582.4	99002.4	96759.1	93901.3
Bradi1g49650.1	0.247165	0.270857	0.180976	0.407182	0.923235	0.999641	0.180976	1.26423	1.01908	1.26423	1.19509	1.08154	1.01908	MGDFNVALVIVAAVVSVLVLLVSVYLLVNYQHPDDANQAYFPKLVVVLGITVAVLSILMLPADVANRQACRKAVYSGACSLTLPMKTLWLIVYIADALLVFLVIPFAMFYYEGDQDKSVGKRLKTALIWVVASAVICGLILGILYALIGKVDFTVRHLSSSVQTFPSSFGAFSNGQPCISPLTRQCSAYSAPANSQTTWTMRASFPEYVVALATIVGSVLFTIFGGVGIACLPLGLIFSFVRRPKAVITRSQYIKEATELGKKAKELKKAAEALHQEERSGNKGRKWRKNVKAVEKELLLLENDMNALEEMYPQGEQAEATWAFTVLAYIGKLIFGVVGLIVSIAWVAHIVIYLLIDPPLSSFLNEIFIKLDGVWGLLGTVAFAFFCFYLLIAVIAGEM…	111642	99848.5	76063.2	82901.8	92613.8	151448	106925	114847	95121.8	117085	116361	114199	111570	100598	110682	76941.5	117670	93160.6	112891	100166	114650	94817.8	88562.2	79495.4	94381.3
Bradi1g50180.1	0.000573278	0.00129975	0.0399156	0.211728	0.000214432	0.00162555	0.000214432	10.5132	4.32635	5.93337	4.32635	10.5132	8.67697	MPKAAGDAKLLIQSLSKAYAATPTNLKIIDLYVVFAVATAVVQVVYMGVVGSFPFNSFLSGVLSCIGTAVLAVCLRIQVNKDNKEFKDLAPERAFADFVLCNLVLHLVIMNFLG	0	463.033	604.755	1193.29	565.269	2254.27	4912.94	3182.9	3065.68	3353.95	2239.32	2160.09	2235.72	3147.08	2445.55	5005.22	9056.49	4004.62	5704.78	5942.78	3675.14	7457.83	4629.75	3856.57	4904.82
Bradi1g50220.1	3.51903e-07	3.34307e-06	0.00138529	9.21914e-08	3.07168e-07	1.40455e-07	9.21914e-08	0.759328	0.477193	0.759328	0.477193	0.558237	0.552192	MALTRIGLAGLAVMGQNLALNIAEKGFPISVYNRTTSKVDETVQRAKIEGNLPLYGFHDPASFVNSIQKPRVVIMLVKAGAPVDQTIATLAAHLEQGDCIIDGGNEWYENTERREKAMEERGLLYLGMGVSGGEEGARHGPSMMPGGSLEAYQYIEDILLKVSAQVPDSGPCVTYIGKGGSGNFVKMVHNGIEYGDMQLIAEAYDVLKSVGKLTNSELQQVFSEWNKGELLSFLVEITADIFGIKDDQGEGYLVDKVLDKTGMKGTGKWTVQQAAELSVAAPTIEASLDSRFLSGLKDERVAASKIFQGDYSTDLPVDKAQLIEDVRKALYASKICSYAQGMNIIKAKSTEKGWGLNLGELARIWKGGCIIRASFLDRIKKAYDRNAELANLLIDPEFA…	512343	671815	639822	609554	608384	441697	394801	503328	508024	461963	305527	289409	269237	297092	290316	404891	344673	310139	298786	339622	327793	351628	347418	316939	335945
Bradi1g50270.1	0.000622828	0.00139105	0.936096	0.382307	0.143812	0.015873	0.015873	1.21917	0.661831	1.05983	1.15626	1.21917	0.661831	MASTLSATSTVGLMATGIASDKKSSSLSSVSSISLASRPRNVRLQRKCNFRVKAAKELYFNKDGSATKKLQAGVNKLADLVGVTLGPKGRNVVLESKYGSPKIVNDGVTVAREVELEDPVENIGAKLVRQAAAKTNDLAGDGTTTSVVLAQGLIAEGVKVIAAGANPVQITRGIEKTAKALVEELKKMSKEVEDSELADVAAVSAGNNYEIGNMIAEAMSKVGRKGVVTLEEGRSSENNLYVVEGMQFDRGYISPYFVTDSEKMTTEYENCKLLLVDKKITNARDLINVLEEAIRGQYPILIIAEDIEQEALATLVVNKLRGSLKICAIKAPGFGERKTQYLDDIAILTGGTVIRDEVGLSLDKADKSVLGTAAKVVLNKESTTIVGDGSTQEEVSKRV…	169340	150917	208048	228065	189093	186046	236009	171401	208172	200407	238858	230602	175141	229957	218639	210891	262662	239913	208680	230536	111569	125932	141932	121157	125147
Bradi1g50280.1	5.10795e-05	0.000164454	0.999952	0.576131	0.0100647	0.000595561	0.000595561	1.07704	0.679922	1.00558	1.07704	0.774891	0.679922	MSEQPLPQPRSSMREALEKEDKEKAAAVAAKEKAAKDKAPPPVAAPPMAKNGGKNGGGGGNGGGGAQPPAAEETTREIQVVREAYRREPAAPAYVMPEEPPAMVELVGWYLYGFCSFFITHLLLPVLFPAIVTQVAFPASDFTPEAKYVVKGATCSVHEMSMYQRLTRHSIAIADSNLSPLGWSGLSWAIGILIAAPILTQVAHHLDRGQYQSLILIAATSFGSFFCLLTGFFKTVWVFLFYILFIASAIIVAEAVHTRNLGLMIRGLAAHDSGKHLVLRRRAAASQLSLYCTAIGGIGAALMAAFMYHMLRRTDQLTGLWVVSIFSGLIWFIGICHGLFTNRPSSSSPTTAFEPNFFTKLTYSMTIARYPQAIGSLVAVFLSSFATMCIFTSGTLYAI…	1.48805e+06	1.35954e+06	1.77177e+06	1.47807e+06	1.52436e+06	1.68348e+06	1.52507e+06	1.36863e+06	1.55426e+06	1.53286e+06	1.55266e+06	1.76175e+06	1.66436e+06	1.58843e+06	1.6418e+06	1.33346e+06	1.08723e+06	1.17672e+06	1.12743e+06	1.18121e+06	1.19365e+06	808927	1.06151e+06	1.08168e+06	1.03644e+06
Bradi1g50380.1	0.00579996	0.00972257	0.876164	0.481602	0.0204657	0.999999	0.0204657	1.13351	0.687245	0.928531	1.13351	0.687245	0.996804	MSRLARLPALLLVLLLCSASLALASASGPEPWTCGDDRVSILEASDGRLHNMSINGVLVHDLSRGCESLRSYFRSGCLRCGDERAEAWMAAWAHYCRGQSSDDVVTSVSNMPRKVLKQPSDNGAKSEDGPCGNMGLHGDKQDGSDSYEKEDPLLAVPGVLLICCGLMLPCFHAERKEGSRHNTTAVQRNAVDSIASFDVSTSSEKVPPTPHRIPPSPSRFAPSPHIGRVGSVDLSVQQIIRATQNFSHSFKLGEGGFGTVYRAVLSDGQVVAVKRAKKDQFAGPSDEFSNEVELLAKIDHRNLVRLLGYTDKGNERIIITEYVPNGTLREHLDGQHGRTLDFNQRLEIAIDVAHALTYLHLYAEKTIIHRDVKSSNILLTDSYRAKVSDFGFARSGPND…	21723.7	37920	36415.5	29288.3	31336.9	29107.5	32283.8	25850.4	29147.4	29097.3	33209.4	38137.8	35223.7	35511.2	35520.5	22247.2	24593.4	21222.5	18081.3	21536.1	35764.3	32145.5	32188.8	24848.4	31236.7
Bradi1g50740.1	0.041063	0.0545217	0.962129	0.118858	0.999952	0.528918	0.118858	1.50335	0.713653	1.11176	1.50335	1.01951	0.713653	MSNNDTLSGRLMVRFCDPEIDTYVNNMTKTYTDTGNEASMVAASVIMFVLAGLFFNLNLFSRFSDVSAILDPKVRLFLTSGLSLFLPVMSYLFSEAKNAGAMAALPGRKPDLSLHAGMILVWMLLVELLRKKVDEVRMRGYSGTIQRAGRVVWLGSLVFFNIRNVGRKAVFGILWVLCATKVVQRIAFTEVGKRSYACGKNSRLVSSYMSQILLQSPRRQDDRQEAPSTSIVDVEQEAGNGDAGDDLLKRSKFLVMGEEDLVIEPTADGYKLKEITQDDTVVTVGKIWSHGATGIEQANRIKRLCLSFALFKLLRQRFEHLPPVTKEETKECRDLIFKGVYNDKEDNAEAVFQMMNDEVNFLCEYYHSVIPVVLASPFFCLANYFLLPLVVLGLCIMTV…	22253.4	15449.8	19975.8	28312.2	21497.8	35956.4	26247.6	18505.3	14892.6	23900.5	30654.4	39731.9	34465.9	24422.6	32318.7	25565.4	29549	20692.2	11861.9	21917.1	20490.8	13926.5	15358	11592.6	15342
Bradi1g50750.1	0.164896	0.186928	1	0.114958	0.74955	0.999132	0.114958	1.65999	1.00453	1.00453	1.65999	1.27481	1.05283	MAAGDDDVDATEKSTFRCLDAARWVVAAAVMVVIVAVTAYAFKVVFRPGTLSLSIVGGSVAVERIHGSNSSSSSNASSSSQNLTFTYSLHAMNPSGRIRIYYTNIRAKLKAINSTKDDNSFLFLRLPDVALAPQSAVDTFLKMTTAAKAPFQEEYFRELRNGTSIGKAWIELNGTLVVENFSGHNMTPVTSTLYYCWPIVVLGGDEDDDSGGTAGSVSNAPCTDKPPTTVPPAS	32306.4	22732.8	45459.3	58482.3	39745.2	50416	56978.9	23868.5	28437.7	39925.3	72349	80978.9	47093.4	63485.9	65976.8	69208.9	72223.1	36213.8	25025.2	50667.8	44725.1	48719.3	42120.4	31814.6	41844.8
Bradi1g51357.1	1.84978e-05	7.00944e-05	0.245671	0.00689216	4.26753e-05	1.02586e-05	1.02586e-05	0.855913	0.467743	0.855913	0.706471	0.490013	0.467743	MGISRDSMHKRRATGGKQKAWRKKRKYELGRQPANTKLSSNKTVRRVRVRGGNVKWRALRLDTGNYSWGSEAVTRKTRLLDVVYNSSNNELVRTQTLVKNAIVQVDAAPFKQWYLTHYGVDIGRKKKTPAATKKDATEDGDAAAPAAAAAEEAKKSNNVQRKLEKRQQGRTLDPHIEEQFSSGRLLACISSRPGQCGRADGYILEGKELEFYMKKLQKKKGKGAAA	19547.6	21005.9	21669.2	17780.5	20000.8	16980.2	15987.1	15678.4	19830	17118.9	13140.5	16579.4	10559.3	16240.7	14130	10789.8	13421.7	8561.65	6429.47	9800.66	10679.3	8390.3	9863.65	8487.73	9355.23
Bradi1g51540.1	3.23615e-05	0.000114282	0.0850055	0.000111794	0.214023	0.299783	0.000111794	1.26237	0.119	0.622565	0.119	0.704464	1.26237	MAAVTIQSVKARQIFDSRGNPTVEVDVGLSDGSFARGAVPSGASTGIYEALELRDGGSDYLGKGVLKAVNNVNAIIGPALIGKDPTEQVDIDNFMVQQLDGTSNDWGWCKQKLGANAILAVSLAVCKAGAMVKKIPLYQHIANLAGNKTLVLPVPAFNVINGGSHAGNKLAMQEFMILPTGASSFKEAMKMGVEVYHHLKSIIKKKYGQDATNVGDEGGFAPNIQENKEGLELLKTAIAKAGYTGKVVIGMDVAASEFYSEKDQTYDLNFKEENNDGSHKISGDSLKDMYKSFVSDYPIVSIEDPFDQDDWATYAKMTAEIGQQVQIVGDDLLVTNPTRVSKAINEKTCNALLLKVNQIGSVTESIEAVSMSKRAGWGVMASHRSGETEDTFIADLSVG…	34418.1	24595.2	17538	16439.2	23247.6	16227.3	10021	19849.1	11795.2	14473.1	4183.85	2783.78	1951.22	2146.99	2766.46	18003.2	17006.9	16025.2	14473.1	16377.1	31296.5	20711.3	35045.8	30334.7	29347.1
Bradi1g51570.1	0.130413	0.151923	0.40579	0.898195	0.891738	0.689266	0.40579	1.18178	0.872996	1.18178	1.08316	0.915112	0.872996	MVSAFFVFCGCVEQANVAVVEKWGRFLRLAEPGLHFFNPFAGEFVAGTLSTRVQSLDVRVETKTKDNVFVQLICTIQYRVVKENADDAFYELQNPQQQIQSYVFDVVRAIVPRMELDSLFEQKNEVAKSVLEELGKVMSDYGYSIEHILMVDIIPDAAVRRAMNDINAAQRLQLASVYKGEAEKILMVKKAEGEADAKYLSGVGIAKQRQAITDGLRENILNFSHTVSGTSAKEVMDLIMVTQYFDTIKELGDNSKNTTVFLPHGPGHVRDISDQIRNGVMEASSSNV	133264	152016	201476	195069	170456	194444	229426	177330	204567	201441	170669	214253	178300	175300	184630	196240	160754	127543	139408	155986	129907	115478	202295	147550	148807
Bradi1g51650.1	1.95968e-08	3.85871e-07	0.0134963	2.8518e-05	4.81221e-10	1.3152e-09	4.81221e-10	0.840918	0.434781	0.840918	0.679158	0.434781	0.511992	MASELAYAPPMKSGKAGFEGVQEVQHRIRITLSSKSVKNLEKVCSDLVKGAKDKQLRVKGPVRMPTKVLNITTRKSPCGEGTNTWDRFEMRVHKRVIDLVSSPDVVKQITSITIEPGVEVEVTISDQ	234852	270489	264132	224784	248564	198576	206965	209628	220919	209022	162165	172746	158396	181950	168814	137964	116205	89304.9	88810.8	108071	126772	116313	141436	124530	127263
Bradi1g51670.1	0.00593767	0.00991326	0.0705339	0.280541	0.001178	0.125646	0.001178	1.57467	1.21578	1.31519	1.21578	1.57467	1.27559	MAAHSVAAAHATMAAPAGAASSACSAPAERLGFRLSSLAGRGLRLPSRPSAASSSSSRRTNRVRAAASVETVQGQAATGALLDKSVNTIRFLAIDAVEKANSGHPGLPMGCAPMGHILYDEVMRYNPKNPYWFNRDRFVLSAGHGCMLQYALLHLAGYDAVKEADLKQFRQWGSSTPGHPENFETPGVEVTTGPLGQGIANAVGLALAEKHLAARFNKPDSEIVDHYTYCIVGDGCQMEGISNEACSLAGHWGLGKLIAFYDDNHISIDGDTEIAFTEDVSTRFEALGWHTIWVKNGNDGYDEIRKAIQEAKSVTDKPTLIKVTTTIGFGSPNKANSYSVHGAALGTNEVEATRQNLGWPYEPFFVPEDVKSHWSRHVPEGAALEADWNSKFAQYEKKY…	646985	554889	624413	734841	640282	980694	1.00153e+06	702646	683497	842092	829731	799136	654064	830825	778439	1.09186e+06	1.13828e+06	913678	889116	1.00823e+06	844758	722689	884465	815024	816734
Bradi1g51757.1	0.010977	0.0169545	0.2227	0.256328	0.229936	0.997498	0.2227	1.77718	0.214842	0.214842	1.74879	1.77718	1.09954	MASSARRRPPRGGGGVGGPERVAENWERLVRAALKRDRDHGRPGGGGGGGVSASAAHAGGAGLASAVPPSLGRTTNIEQILQAADDIEDDDPNVARILCEQAYTMAQNLDPSSDGRGVLQFKTGLASVIKQKLAKKDGASIDRQNDIEILWNFYLEYKSRRRVDDMQREQERLRESGTFSTEMGARAVEMKKIYATLRALLDVLEILVGPAPTDRLGKQILEEIKKIKRSDAALRGELMPYNIIPLDASSVANIVGFFPEVRAAIAAIQNCEDLPRFPYDTPQLRQKDIFDLLQYVFGFQDDNVRNQRENVALTLANAQSRLSLPNETEPKIDERAVTEVFCKVLDNYIKWCRFLGKRVAWTSLEAVNKNRKIILVALYFLIWGEAANIRFLPECLCYI…	41264.5	10162	7589.09	3532.13	15636.9	591.811	3430.75	1898.94	7516.39	3359.47	27091.8	16895.7	38129.4	27266	27345.8	33027.5	24886.9	28535	24709.3	27789.7	21139.3	21599	13434.4	12600.7	17193.4
Bradi1g51890.1	0.00221019	0.00422914	0.700233	0.128339	0.135212	0.00900553	0.00900553	2.72294	0.509863	0.509863	2.05954	2.046	2.72294	MEWATVQHLDLRHAGGRRGGNSPARPLQPHAAAFRASQAIVAVAIGTHVIEFDALTGSKIALVDLGARVVRMAYSPTASHVIIAILEDATIRSCDFATEQTLVLHSPEKKTDHVSIDTEVHLALTPLEPIVFFGFHKRMSVTVVGTVEGGRPPTKIKTDLKKPVVNLACHPRLPVFYVAYAEGLVRAYNVHTYAVHYTLQLPVDSTIKLMGAGAFGFHPTLEWVFIGDRGGTLLAWDVSTERPNMIGITQAGSQPITSVSWLPTLKLLVTISKDGTLQVWKTRVIINANRQPMETHFFERAAIETMDITKILTLQGGEAVYPLPRIKNLAVHPKFNLAAVIFADMSATEAAKNKAAYTREGRRQLFAVLQGARGSTASVLKEKLSALGSSGILAEHQLQ…	47101.1	17567.1	20836.2	11057.3	24140.4	8245.13	13903.9	9953.78	17130.4	12308.3	55652.8	34220.7	67868.3	41131.3	49718.3	25658.3	37206.4	79295.6	55405.2	49391.4	77417.4	82070.4	58240	45204.3	65733
Bradi1g52200.1	0.000903996	0.00192938	0.96602	0.0753348	0.0209259	0.972453	0.0209259	1.26758	0.661193	1.05176	1.26758	0.661193	1.04874	MASPAALLCLAVAFLAGAAMAADPYAFFDWDVSYITASPLGVPQKVIAINKQFPGPIVNVTTNYNVVVNVLNSLDEPLLITWDGIQHRKNCWQDGVLGTNCPIPPGWNWTYNFQVKDQIGSFFYFPPLSLQRAAGGFGGITVNNRAVISVPFDTPDGDIRLFIGDWYKKNHTDLRKMLDDGKELGMPDSVLMNGKGPYRYNDSLVPAGIEYETINVEPGKTYRFRVHNVGVSTSLNLRIQSHNMALVETEGAYTMKQNFTNLDIHVGQSYSFLVSMDQNASSDYYIVASARFVNESIWTRVTGVAILHYSNSKGKASGPLPDPPNDQYDKTFSMNQARSIRMNVSTGAARPNPQGSFHYGQINVSQVYKLRNEPPVTINGKKRTTLSGISYSPPATPLR…	577107	549434	754752	713086	648594	732868	726275	574773	694741	682164	711941	682195	893680	1.00076e+06	822143	372060	417980	470836	454509	428846	803133	618603	675960	623140	680209
Bradi1g52220.1	0.0164396	0.0242637	0.999048	0.752329	0.0163409	0.0699503	0.0163409	0.954655	0.198212	0.954655	0.770732	0.198212	0.381	MASHRHLLRLLDDPFFPFPSPPPSSSCPFLPPSSPFAFPHHDLDIFLPSDPFFAPFPTPTPHAYLLHDLTDRVAALELALAPHPPKPATSRRKYTYATQTPGGRKAKWTAEDNPRSGERALKWEAELACPNPDGFDRKWKWEAKSKPGASSAKTKWAAEIKGKGALEPWSHAYTWEEEEDLSSSDDDEELYYRHRKPEIKDKKKNKDKAAKEDKKEKKNKVGGNVNVRIEEIPEDNTAGCVAIRKAFAMGNGKGKAKELSPQDAALLIQMNYRAHLAHRSQVLRCLRDLAVAKAKLKELRSMFYNLSYRRRISHDHEERQRFSEKIIVLLLTVDALEGPDYMVRTAKKSMLEELEGMLDIVDPQPVGKQRSFSRRKFDLPEGGGAIPAEKTASVNNAVR…	19037.1	87249.3	131342	158948	99144.2	73369.8	118889	83678.5	102656	94648.4	67261.8	113559	92607.8	32225.6	76413.6	17271.8	6470.78	27082.9	27780.6	19651.5	56123.9	35322.9	46382.3	13266.6	37773.9
Bradi1g52260.1	5.81151e-06	2.82004e-05	1	1	0.00250022	6.8516e-06	6.8516e-06	231.667	1.1072	1.19166	1.1072	141.151	231.667	MALLLRHSRKLRRVHGVLDCERGSIARHFSASACSTTLKKEDGVSNSSLEYGKKAGSLSISQDRKSGKDTHKFKQVSPQEARGLYSSNRVLISATGVNSLFSCGQVVLARHFSSAADLPAHEEIGMPSLSPTMTEGNIARWVKKEGDKVSPGEVLCEVETDKATVEMECMEEGYLAKIVCGDGAKEIKVGEIIAITVEEEGDIEKFKDYKAPASSAAPAESKPQSESTEPKGEEKELPKAAEPKATKTEESSHSGDRVFSSPIARKLAEDNNVPLSSLKGTGPDGRILKADIEEYLSSEAKGTKKEAAAAPGLGHVDLPNSQIRKVTANRLLKSKQTIPHYYLTVDSRVDELIKLRSELNPLQDASGGKKISINDLVIKAAALALRKVPECNSSWMNDF…	0	68.9673	0	0	17.2418	0	0	0	82.1855	20.5464	0	76.3607	0	0	19.0902	1473.38	1812.39	2202.98	4246.07	2433.71	3119.52	2670.66	5396.6	4790.65	3994.36
Bradi1g52520.1	0.157733	0.18017	0.49756	0.330076	0.944426	0.0707874	0.0707874	1.82083	1.18149	1.43069	1.52777	1.18149	1.82083	MTSKKSNRSTVTSCTALHMEWDRISCPVCMEQPHNAVLLICSSYKNGCRCYICNTSHRHSNCLDRFREMNGDSKVRDSHSTSSVLSNSNNRTAQPRAHYSMISRHLMSPSLRRHIDNANNQESAHSTLSVGEGSIILEECHDAMQISADLKCPLCRGSVSGWIPAGEVRKYLDEKLRTCSHDPCKFVGTYEQLREHARTAHLLAKPAHVDISRKRSWDRLEREQEFGDVISAIRSQNPGAIIVGDYVIETREDMSPDEDSGEESGDEWWSPVRDPMESPDNMDGSPRPWPNRRLGSTSIWGDEQHVFHRFLPQPRLPLSDRRTSRTVWQGIRRSSTQSLMRRGFSNQHYRRSSSYHGYRRTILPRPYADDHRAGINRRQDVPAFGLRRRQRLRYTQGRH…	11973.9	8981.79	7801.61	19831.4	12147.2	17354.9	14269.2	23592.7	14298.4	17378.8	26260.4	14131	19275.8	14565.1	18558.1	6286.34	20608.9	21007.1	9504.46	14351.7	26609.9	24343.5	18985	18533.4	22117.9
Bradi1g52557.1	0.224935	0.248109	0.0921116	0.236872	0.335635	0.489372	0.0921116	0.754003	0.562111	0.562111	0.662251	0.703495	0.754003	MEAEAAAKRAREGEGAATADGAGEQAGISAVIPGWFSEISPMWPGEAHSLKVEKVLFQGKSDYQNVLVFQSSTYGKVLVLDGVIQVTERDECAYQEMITHLPLCSIKDPKKVLVIGGGDGGVLREVSRYSSVEQIDICEIDKMVVDVSKQFFPHLALGFEDSRVSLHIGDGVAFLKNAPEGTYDAVIVDSSDPIGPAQELFEKPFFQSVSRALRPGGVVCTQAESIWLHMHIIEDIVTNCRQVFKGSVNYAWTTVPTYPSGVIGFMLCSTEGPPVDFQHPVFNIEEDDYSTKSKGPLKFYNSEHHFVCHLSRKGSLSPSLTEEGRWSKGPDQT	13438.6	13850.1	29735.8	15798.3	18205.7	10168	9504.25	10685.6	10576.6	10233.6	9994.11	12739.6	6576.15	18917.1	12056.7	17278.2	13623.2	11657.5	8671.53	12807.6	10118.5	12213.6	16761.1	15815.4	13727.1
Bradi1g52567.1	0.0609093	0.0772243	0.21785	0.502419	0.0886523	0.0215051	0.0215051	0.777214	0.469241	0.680352	0.777214	0.593516	0.469241	MGLCSSSSAASPADPAGGNGNKEKGRKGSGSRGIVACGKRTDFGYDKDFEARYTIGKLLGHGQFGYTFAAVDRYSDERVAVKRIDKNKMVLPVAVEDVKREVKILKALQGHENVVHFYNAFEDDNYVYIVMELCEGGELLDRILAKKDSRYSEKDAAVVVRQMLKVAAECHLHGLVHRDMKPENFLFKSSKEGSPLKATDFGLSDFIRAGKQFRDIVGSAYYVAPEVLKRKSGPESDVWSIGVITYILLCGRRPFWDKTEDGIFKEVLKNKPDFRRKPWTNITPSAKDFVQKLLVKDPRARLTAAQALSHEWVREGGQASEIPLDISVLHNMRQFVKYSRFKQFALRALASTLNSEELSDLRDQFNAIDIDKSGTISLEELKQALAKDVPWRLKGPRVL…	17400.1	9211.42	8026.81	7915.96	10638.6	9522.06	5345.25	6324.13	7760.44	7237.97	8032.52	10060.7	6995.1	7985.43	8268.45	4774.09	6101.71	6184.28	8196.55	6314.16	7760.57	2841.68	5130.56	4235.38	4992.05
Bradi1g52680.1	0.036774	0.0493613	0.591691	0.082648	0.822506	0.362483	0.082648	1.21475	0.927651	1.10375	1.21475	0.927651	1.13718	MGLISGMVMGVVVGVAIMAGWSHLMQRRSRKRIAKAADIKVLGCLGRDELKKLCGDNFPEWISFPQYEQVKWLNKHLSKLWPFVSQAATAVVKESVEPLLDDYRPPGIKSLKFNKFSLGNVSPKIEGIRIQNLQPGQIIMDIDFRWGGDPSIILAVDARVASLPIQLKDLQVFTVVRVVFQLSEVIPCISAVVVALLADPEPKIQYTLKAIGGSLTAIPGLSDMIDDTVNSIVNDMLKWPHRIVVPLGVNVDTSDLELKPEGKLYVTVVKATSLKNKELIGKSDPYVTLYVRPIFKVKTKVIDDNLNPEWNETFELIVEDKETQSVIFEVYDEDNLQQDKMLGVAKLPMNNIEPESPSEITLKLMQSLDSLKIKDYRDRGTLHLKIRYHPYTKEEQLEA…	521301	499253	695958	638528	588760	578821	757370	593427	669761	649845	684822	822671	720429	632871	715198	493080	496547	600009	595020	546164	656202	714642	656262	650990	669524
Bradi1g53290.1	0.0093112	0.0146738	1	0.0429253	0.157325	0.0136759	0.0136759	0.999325	0.810924	0.999325	0.843034	0.882877	0.810924	MCCSDCGCYDSCCDCFCPCLSSETRETILCCAVCFAVVAGVVLFAVLLAAYGFVRHAEVSVPEASLTRLTLLDNTSQATAFAYNISLTLNIRNKNWAMAAKNTKPLDAEYNFDGQRFERARLAAEGEKHPPGKTRVYHLASGADNAYVALGNAGVAEFRKQNATGVFEVEVVVSGEVKYTARYTKCKFEAKCPLKLQLAPPGTPAVVFQAVKCKLTKPEKNC	239995	229986	268483	257154	248904	266481	244152	226493	257820	248737	191788	234316	202068	211167	209835	213371	244615	221448	199573	219752	215777	170024	227680	193889	201842
Bradi1g53680.1	1.44016e-05	5.79934e-05	0.0798159	0.0442816	0.000588377	0.989098	0.000588377	2.17453	0.349205	1.57732	0.349205	2.17453	0.917616	MKPSAAILLGAAIAALLLVSAVRGEGEEDECGSAESAAADRARVRPLKIAAFFSILVSGALGCSLPVLARRVPGLRPDGDVFFLVKAFAAGVILATGFIHILPDAFENLGSPCLPSDGPWKDFPFAGLGAMVGAIGTLVVDTLATGYFTRAHSKKGGGAVVDEEKQAAAAAGEEDVHVHTHATHGHAHGSAALVAAVGGAEDDKMDTIRYRVISQVLELGIVVHSVIIGISLGASQEPDTIKPLVVALSFHQMFEGMGLGGCIVQAKFKARSIVTMILFFCLTTPVGIAVGVGISRVYNENSPTALVVEGGLNSVAAGILVYMALVDLLAEDFMNPKVQSRGKLQLGINLSMLLGAGLMSMLAKWA	47805.7	42730.5	33159.6	56325.1	45005.2	60933.9	52557.2	96058.4	74401.8	70987.8	20190.6	14693.7	13822.6	14157.4	15716.1	62643.8	102504	104960	121353	97865.2	36961	46128.5	39603.7	42496.8	41297.5
Bradi1g53740.1	5.92497e-06	2.85456e-05	0.150774	0.000315342	1.14362e-05	1.58646e-05	1.14362e-05	0.794036	0.256977	0.794036	0.482148	0.256977	0.353278	MAEDAPAAVVPAPVEAPTPVLGEPMDLMTALQLVMKKSSAHDGLVKGLREAAKAIEKHAAHLCVLAEDCDQPDYVKLVKALCSEHNVHLVTVPSAKTLGEWAGLCKIDSEGKARKVVGCSCVVVKDYGEESEGLNIVQEYVKSH	27771.9	39398.8	28360.1	26693.9	30556.2	19917	28598.3	21706.6	26828.8	24262.7	13329	12390	10478.6	22732.8	14732.6	7666.96	9200.94	8238.84	6302.22	7852.24	13298.7	8203.31	10955.3	10722.1	10794.8
Bradi1g54030.1	0.00158784	0.0031875	0.0198117	0.00128928	0.00211755	0.408494	0.00128928	1.71898	1.23391	1.50435	1.71898	1.67384	1.23391	MAFFPAATATTAAAVAFTSTRCVSPRPSSPYLPRGVASSAIAARRRAAPRAAAVRFSVRAQAAKKSVLVVNTNSGGHAVIGFYFAKALLAAGHAVTVLTVGDEGSDKMKKPPFSRFSELTSAGAKTVWGDPADVGAAVGGASFDVVLDNNGKDLDAVKPVADWAKSAGVGQFLFISSAGIYTPTDEPPHVEGDAVKGSAGHVGVEKYIAAEFGSWASFRPQYMIGSGNNKDCEEWFFDRIVRKRPVPIPGSGMQLTNISHARDLGSMLTMAVESPDAAAGKIFNCVSDRAVTLDGLAKMCAAAAGAAVEIVHYDPAAAGVDAKKAFPFRNMHFYAEPRAAKEVLGWTSTTNLPEDLKERFAEYASSGRGDKAMSFDLDDKILSAVGAAPVSVAA	28646.7	25186.4	26075.9	35288.8	28799.5	54126	50451.3	35710.4	33009.6	43324.3	46513.2	50905.8	46815.6	53788.3	49505.7	45295	59338.3	43500.1	44689.8	48205.8	37265	31829.9	36018.7	37029.7	35535.8
Bradi1g54200.1	0.000257486	0.000644431	0.973881	0.0146565	0.0470852	0.0883445	0.0146565	1.42382	0.413335	0.921192	0.413335	0.517231	1.42382	MAAPRLPVLFLLLALLVVACRGEASGEGPRGRKVLVLVDDLAVRSSHSAFFGSLQARGLDLEFRLADDPKLSLHRYGQYLYDGLVLFAPSTPRFGGSVDQNAVLEFIDAGHDMILAADSSASDLIRGIATECGVDFDEDPEAMVIDHINYASTEVEGDHTLIAGDDLIESDVILGSKKIDAPVLFRGIGHAANPSNSLVLKVLSASPSAYSANPKTKLASPPSLTGSAISLVSVMQARNNARVLISGSLDLFSNRFLKSSVKKAGSKLSHEKAGNEQFVTETSKWVFHERGHLKAVNVKHHKIGETNEPSMYRINDDLEYSVEIYEWSGTSWKPYVADDVQVQFYMMSPYVLKNMSTDKKGVYSSSFKVPDVYGVFQFKVEYQKLGYTGLSLAKQIPVR…	28989.1	44459.6	22181.1	24203.4	29958.3	25077.5	24686.1	32178.7	28447.1	27597.3	12926.1	9860.87	13239.5	13504.8	12382.8	11382.9	19736	16395.7	14466.8	15495.4	28133.4	47918.8	56102.9	38465.2	42655.1
Bradi1g54270.2	7.56803e-06	3.44908e-05	0.0315163	0.000468165	3.23971e-06	7.70862e-06	3.23971e-06	0.735578	0.324836	0.735578	0.544024	0.324836	0.360243	MADRGGERGGDRGGFGRGFGRGDRGGRGDRGRGGRGGRGGRRGGRQEEEKWVPVTKLGRLVREGKFQKIEQIYLHSLPVKEHQIVDTLCPGLKDEVMKITPVQKQTRAGQRTRFKAFVVVGDSNGHVGLGVKCAKEVATAIRGAIILAKLSVVPVRRGYWGNKIGQPHTVPCKVTGKCGSVTVRMVPAPRGSGIVAARVPKKVLQFAGIDDVFTSSRGSTKTLGNFVKATFDCLMKTYGFLTPDFWTETRFVKAPYQEYTDLLAAKPAKLMIEAPVDLPEA	58114.9	81769.2	99365.8	84348.5	80899.6	47691.6	65763.2	57515.2	67061.8	59508	47016.4	51021.1	29696	48311.7	44011.3	30607.5	32347.5	23725.3	18436.2	26279.1	30370.8	31293.3	31300.5	23609.4	29143.5
Bradi1g54305.1	9.6112e-05	0.000279429	0.343058	0.975064	0.561102	3.52986e-05	3.52986e-05	2.04871	1.07385	1.26722	1.07385	1.20508	2.04871	MSKTGALDLASGLGGKITKEEVKSAVDEYEKYHGYYGGKEEARKSNYTDMVNKYYDLATSFYEYGWGESFHFAHRWNGESLRESIKRHEHFLALQLELKPGMKVLDVGCGIGGPLREIARFSSTSVTGLNNNDYQITRGKELNRLAGLSGTCDFVKADFMKMPFSDNTFDAVYAIEATCHAPDPVGCYKEIYRVLKPGQFFAVYEWCITDHYDPNNATHKRIKDEIELGNGLPDIRSTRQCLQAVKDAGFEVIWDKDLAEDSPLPWYLPLDPSRFSLSSFRLTTVGRLITRNMVKALEYIGLAPQGSQRVSSFLEKAAEGLVEGGKKEIFTPMYFFVVRKPLSE	17178.2	24810	23687.3	29383.8	23764.8	19096.8	28570	30792.9	42001	30115.2	27251.1	26879.4	25007	22942	25519.9	25503.4	28547.6	25965	34537.6	28638.4	48738.3	46910.9	44190.7	54909.2	48687.3
Bradi1g54510.1	0.0231864	0.0324465	0.23511	0.22658	0.0252643	0.00877035	0.00877035	0.571831	0.165724	0.571831	0.566311	0.288817	0.165724	MAQPLVVKKDDDCDEEEYYSPFLGIEKGAVLQEARVFHDPQLDARRCCQVITKLLYLLNQGDTFTKVEATEVFFATTKLFQSKDAGLRRMVYLMIKELSPSADEVIIVTSSLMKDMNSKTDMYRANAIRVLCRIIDSTLLTQIERYLKQAIVDKNPVVASAALVSGIYLLQTSPEIVKRWSNEVQEAVQSRAALVQFHALALLHQIRQNDRLAVSKLVTSLTRGSVRSPLAQCLLIRYTSQVIRESGMNTQGGDRPFFDFLESCLRNKAEMVILEAARAITDLNGVTSRELTPAITVLQLFLSSSKPVLRFAAVRTLNKVASTHPLAVTNCNIDMESLISDQNRSIATLAITTLLKTGNESSVDRLMKQMTNFMSDIADEFKIVVVEAIRSLCLKFPLK…	6851.18	26863.1	47046.2	27795.1	27138.9	12315.8	17230.5	12704.1	19824.9	15518.9	21523	13841	21831.8	4280.37	15369	11468.5	331.806	12686.7	6865.64	7838.16	6049.75	8107.84	1298.86	2533.77	4497.56
Bradi1g54560.1	5.83412e-06	2.82087e-05	0.0747072	0.558014	0.000989884	0.0038595	0.000989884	1.16271	0.696531	1.16271	1.08024	0.696531	0.737622	MGSRVVSLVVAVAVAMAAGVGVGADFAADRAECSDKLVALATCLTFVQGQAPAPTPDCCAGLKTVLQSSRKCLCVLVKDRDDPGLGLKINVTRALGLPAACSAAANISDCPRLLNLPPNSKDAQVFEDFAKQQAAQGSPGSGPSAPSTGAQKSAATRMGRWLGGGHCEQVDWWFLRSNLGTERVRGMRLSVVMGGGEEGAGVASGSNIWSSEGVGGWAKVTGVAYGMRGSGGIVASRSRGGDG	297154	369921	402047	374575	360924	380008	421724	444617	432253	419651	370110	383722	384409	421299	389885	249172	208235	260270	287902	251395	286018	245620	301598	231667	266225
Bradi1g54630.1	0.19075	0.213722	0.528567	0.366071	0.573464	0.0612004	0.0612004	1.77057	1.35735	1.37773	1.4596	1.35735	1.77057	MAAAPSRSRGDYDHLIKLLLIGDSGVGKSCLLLRFSDDTFTTSFITTIGIDFKVRTVELDGRRVKLQIWDTAGQERFRTITTAYYRGAMGILLVYDVTDESSFNNIRNWIRNIEQHASDNVNKILVGNKVDMDAKRVVSTAQGQKLADEYGIKFFETSAKTNQNVEQVFFSIARDIKQRLTETVAAANEPPTIQISRQEPDRAGGAASRWSSSCCNT	9659.81	8598.86	12162.3	10526.5	10236.9	13665.3	15227.4	13937.9	13584	14103.6	13962.2	17485.9	14937.5	13381.4	14941.7	20763	11918	9990.72	12908.3	13895	13306.9	12290	29443.3	17460	18125
Bradi1g54640.1	0.902489	0.905847	0.984373	0.983438	0.972563	0.999982	0.972563	1.0809	0.906833	1.07961	1.0809	0.906833	0.985944	MHKVLVHNPSYDEIFLVNRFVNGLKSSMRIAVRLHTPRTIDTAVCLALVQEEELDFLKRKPYYKADGKEYTKSFQKALVPSESVLGPTPGTDKHHQTTLHEKYESLRAMRRAKGLCFNCGDKFSPSHKCAKRISVHVLDELLETLQLDTSPTSTSVDTSESESDTELMSISDDALHGTSKRKTIKLQCYVGKQSLLVLVDYGSSHNYVSEQLVQALKLSTVPVSAASVQLADGKPLCSDQAIQDMSWWTQGHTFTTSLTVLPLGCYDIILGMDWLSDCSPMYVDWKTKKMRFHHQGTRITLRGLKGTISGCLPLIAVQMTKMLKHGHVEQVLQLCPISSDSSVAALEIVPVKVQSLLQKNSAVFAEPTELPPPRAYDHTIPLLPAAKPVNLRPYRVSPQ…	3115.03	2284.75	1549.15	2107.83	2264.19	3035.55	2053.79	3196.81	1491.66	2444.45	2834.59	2632.68	2499.98	1822.23	2447.37	1533.77	3095.76	1588.97	1994.47	2053.24	2588.55	2801.19	1505.81	2033.91	2232.36
Bradi1g54680.1	0.161679	0.183436	0.242561	0.71348	0.0770071	0.196424	0.0770071	0.881585	0.705586	0.783406	0.881585	0.705586	0.768155	MGQQSLIYAFVARGTVVLAEYTEFTGNFTTIAAQCLQKLPASNNKFTYNCDGHTFNYLVEDGFTYCVVAVESVGRQTPIAFLDRVKDDFTKRYGGGKAATAGASSLNREFGSKLKEHMQYCVDNPEEINKLAKVKAQVSEVKGVMMENIEKVLDRGEKIELLVDKTENLRSQAQDFRQQGTKVRRKMWLQNMKIKLIVLGIIIALILIIILSVCHGFKCNK	10405.4	12377.5	15641.8	15811.3	13559	9564.5	9413.85	9593.71	13916.7	10622.2	7519.94	13576.6	12757.9	13959.1	11953.4	9653.59	7034.13	12151.4	9428.97	9567.03	11404.6	9911.5	10221.7	10123.7	10415.4
Bradi1g54847.1	3.05446e-08	5.21578e-07	0.704549	0.00298696	7.33761e-11	2.27608e-05	7.33761e-11	2.64771	1.14048	1.14048	1.57202	2.64771	1.9058	MDEKASNLDAVLKESVDLENIPLEEVFENLRCSREGLSSTQAEQRLAIFGPNKLEEKKESKFLKFLGFMWNPLSWVMEAAAIMAIALANGGGKPPDWQDFVGIITLLIINSTISFIEENNAGNAAAALMARLAPKAKVLRNGRWNEEESAILVPGDIISVKLGDIIPADARLLEGDPLKIDQSSLTGESLPVTKGPGDGVYSGSTCKQGEIEAVVIATGVHTFFGKAAHLVDSTNQVGHFQKVLTAIGNFCICSIAVGMVIEIVVMYPIQHRAYRPGIDNLLVLLIGGIPIAMPTVLSVTMAIGSHRLAQQGAITKRMTAIEEMAGMDVLCSDKTGTLTLNKLTVDKNLIEVFQRGVDQDTVILMAARASRTENQDAIDATMVGMLADPKEARAGIQEV…	439460	273089	397730	339500	362445	387337	402824	423200	440090	413363	604783	489666	501937	682704	569772	962647	1.08085e+06	875788	919311	959649	749505	681582	714258	617648	690748
Bradi1g54990.1	0.0893196	0.108747	0.457695	0.289536	0.0706622	0.0419856	0.0419856	1.36399	1.18085	1.18085	1.22249	1.32843	1.36399	MVFDAGSGGGPAKAPHPLRVILTPAFARQVAVGRWFTVFASFAILTASGATYIFGIYSKTLKSSLGYDQQTLNTISFFKDLGANLGVFSGLINEVTPPWVVLAIGAAMNLVGYLMVYLAVDGRTSRPPVWLVCLYIFVGANSQSFANTGALVTCVKNFPESRGIVLGILKGFVGLSGAVYTQLYLALYGDDAKSLILLIAWLPAAISVVFVHTIRIMPYPRRRGGQETSGDPFFCFLYISIALACYLLVMIVVQKQFTFSHGAYAIAASALLIVLFLPLCVVIKQEYKIHRERELDRANEPPPTITVAAAADDPASQVQMSGSDSKTEPQQQQIQGASSSSSCMGSWGGCVKKMFRPPARGEDYTILQALVSIDMLVLFVATICGVGGTLTAIDNMGQI…	25341.8	17404.1	20307.1	21264.1	21079.3	27029.5	23266.7	25701.6	23567.9	24891.4	26762.1	27121.6	24098.4	25094.7	25769.2	23281.6	26228	33353.5	29146.1	28002.3	35531.9	20296.3	29404.6	29774.6	28751.8
Bradi1g55100.2	0.169477	0.191638	0.164957	0.902382	0.751146	0.11267	0.11267	0.928138	0.755421	0.778532	0.928138	0.898874	0.755421	MAAEEGTVIACHNKQEFDTHMAKAKEIGKLVIIDFTAVWCGPCRIIAPVFAEYAKKFPGAIFLKVDVDELKEVAEEYKIEAMPTFLFIKDGEKVHTVVGGKKDEIEAKIVAYTATAST	54169.5	76077.6	80937.8	65940.1	69281.2	39386.2	54815.5	55070.1	66479	53937.7	59870.2	78409.4	55398	63532.6	64302.5	70203.2	68833.8	55797.9	54265.5	62275.1	43796.6	45365.9	52988	67195.5	52336.5
Bradi1g55280.1	0.000175861	0.000465171	0.303503	0.00121545	0.00015775	0.000750108	0.00015775	0.806572	0.351127	0.806572	0.477641	0.351127	0.446636	MADVEVDPEVATGAQPAKKRTFRKFSYRGVDLDALLDMNTDDLVQMFPARARRRFKRGLKRKPMALVKKLRKAKKDAPAGEKPEPVRTHLRNMIIMPEMIGSIVGVYNGKTFNQVEIKPEMIGHYLAEFSISYKPVKHGRPGIGATHSSRFIPLK	9797.77	14655	9597.8	7484.82	10383.8	7474.9	7461.62	10226.7	8338.03	8375.31	5711.77	6088.75	3654.47	4384	4959.75	3879.7	4722.8	2664.19	3317.5	3646.05	4857.62	3191.99	4727.1	5774.46	4637.79
Bradi1g55300.1	0.0223868	0.0315237	0.156766	0.00493189	0.233595	0.0813637	0.00493189	0.859049	0.703996	0.84074	0.703996	0.859049	0.81288	MDKLKGSARLMIVSDLDHTMVDHHDEENLSLLRFGALWESLYCQDSLLVFSTGRSPTLYKELRKEKPMLTPDITIMSVGTEITYGEEMVPDAGWEEYLNNKWDKNIVLEETAKFPQLKLQVESEQRPHKVSFLVDKKTAQEVIKSLSENFEKRGVDAKIIYSGGQDLDILAQGAGKGQALAYLLKKLGSCGKTPNNTLVCGDSGNDAELFSIPGVHGVMVSNAQEELLQWRAENAKDNPKVIHATERCAAGIIQAIGHFKLGPNVSPRDVEFPYVKEDSFKPTEAVVKFYVLYEKWRRADVPKADSVVEYFKNVTDANGVTIHPAGLEFSIHSAIDALGSCYGDKQGKKYRAWVDRLVISQTASDSWLVRFDLWESEGDAWVCCLASLALTVKPESPAG…	40205.2	35770	42704.7	32261.2	37735.3	36364.1	35011.7	28589.4	26937.1	31725.5	28642.3	26916.3	22711.1	27992.3	26565.5	35473.4	34674.4	26573.6	32944.4	32416.5	28358.8	26611.9	35146.5	32579.8	30674.3
Bradi1g55510.1	1.3118e-06	9.51408e-06	0.235326	0.00052938	3.3389e-06	1.43371e-06	1.43371e-06	0.831698	0.260226	0.831698	0.542723	0.260226	0.285672	MAPSTRPLVSVKALEGDMATDAVNLALAEVFRAPLRPDIVRFVHRLLSCNKRQPYAVSRRAGHQTSAESWGTGRAVSRIPRVPGGGTHRAGQGAFGNMCRGGRMFAPTKIWRKWHRRVNVHLRRVAVSSALAATAVPALVLARGHRIETVPEMPLVISDSAESIEKTSQAIKILKQIGAYADAEKAKDSVGIRAGKGKMRNRRYVKRKGPLIVYGTEGSKIVKAFRNLPGVDVANVERLNLLDLAPGGHLGRFVIWTESAFKKLEEVYGTFDAPSLKKKGFVLPRPKMANADLGRIINSDEVQSVVKPINKEVKLREKRRNPLKNAAAVLKLNPYFGTARKMATLAEAARVKARKEKIASKRTKLSPEEAAKVKAAGKAWYKTMISDSDYTEFDVFSKW…	132673	206140	238069	212469	197338	132477	187098	157776	179150	164125	120257	120834	102302	85004.6	107100	44796.5	43850.3	58507.5	58255.1	51352.4	64811.5	69859	38239.8	52585.1	56373.9
Bradi1g55740.1	0.311567	0.336244	0.943123	0.46295	0.192361	0.339713	0.192361	2.91593	1.54878	1.54878	2.34767	2.91593	2.56539	MAAAATAVRFHQAAGRRAAGAAAPPRRAAARFAVRADAAPAAATALTQDDLKRLAAVRAVEQVQSGMVLGLGTGSTAAFAVAEIGALLANGKLSGIVGVPTSKRTFEQATSLGIPLSTLDDHPVIDLAIDGADEVDPDLNLVKGRGGALLREKMVEAASGKFIVVVDETKLVTGLGGSGLAMPVEIVQFCWKYNQVRLQDLFNEEGCEAKLRLNEDGKPYVTDNSNYIVDLYFKTPIKDALGAGKEIAALEGVVEHGLFLNMASSVIIAGSDGVSVKTK	26956.8	18731.1	23859.5	36578.5	26531.5	44811.8	46227.3	37063.5	36262.7	41091.3	40319.2	44824.3	33423.6	130582	62287.3	63119	158670	48658.8	39007.4	77363.8	37433.3	35042.1	107424	92354.6	68063.5
Bradi1g55770.1	2.12551e-09	7.54557e-08	0.00952082	3.36917e-08	1.9444e-11	1.00746e-09	1.9444e-11	0.818122	0.266909	0.818122	0.538538	0.266909	0.432125	MAARALLAVAMALAVVSVASAQSSSSGCTQTLIGMSPCLGYITGNSTKPSSSCCSQLASVVKSQPECLCVALNADPAALGLGSINKTRAVGLPDECSVKTPPLSNCNSGAAPTTSPSAGTPAGQTPTSAGAGSKTTPTTDIGSGVAPSLRGVAGIIAGLVVAAVSVM	42251.6	39995.7	50100	48361.8	45177.3	38314.3	34766.9	37857.1	36903.7	36960.5	27796	21287.4	22294.9	25940.4	24329.7	15078.3	7883.33	14745.1	10526.1	12058.2	22328.2	17505	17461	20794.6	19522.2
Bradi1g56270.1	2.50193e-05	9.04853e-05	0.82895	0.998394	9.30369e-05	0.00551035	9.30369e-05	1.07209	0.491101	1.07209	0.981168	0.491101	0.661853	MASLGRVALLPVVVVAMAAAAAMVEGLGVNWGTQASHPLPAKVVVQLLRDNGIKKVKLFETNLDAMSALAGSGIEVMAAIPNNMLHDMAADPKAARDWVKRNVKRFDFDGGVIIKYVAVGNEPFLEAYNGSFIKATLPALENIQNALNDAGAGDRIKATVPLNADVYNSPAKNPVPSAGRFRSDISGVMTDIVKFLAKNKAPFTVNIYPFLSLYLSDDFPLDFAFFDDGGPPVHDGGNGVTYTNVFDANFDTLVAALRAAGHGDMPVIVGEVGWPTDGDRRATAALAERFYGGLLKRLATTHGSPARPGQRIEAVYLFGLVDEDRKSVAPGSFERHWGIFRYDGQPKYGMDLAGQGRRANARLVPAKGVEYLSRTWCALNPKAGDLGKLGEKIDYACSN…	223376	286149	377332	412868	324931	348269	328158	362814	354179	348355	311878	329427	314729	319214	318812	165260	147122	156810	169104	159574	238150	191309	223556	207211	215057
Bradi1g56720.1	0.00659366	0.0108606	0.0192897	0.127037	0.195615	0.00159744	0.00159744	1.24946	1.11032	1.18013	1.12441	1.11032	1.24946	MNNLLTDSFELPRRDSSRDGDIEMGMHQADASDNLKGFLKKVDGIEGLIAKLTNLLTKLQTANEESKAVTKASAMKAIKQRMEKDIDEVGKIARTAKTKVDELEKDNLSNRQKPGCGKGSAVDRSREQTTGAVKKKLKERMDDFQVLRESIRQEYREVVERRVFTVTGNRPDEETIDDLIETGRSEQIFKDAVQQQGRGQVLDTVAEIQERHDAVRDLERKLLELQQIFLDMAVLVEAQGDMINHIETHVSNATNHIQQGVGALQNAKKLQKNSRKWMCYAIILLLVIVAIIILAVIQPWKK	450934	375450	470923	490039	446836	485808	541905	543102	538494	527327	485562	530666	468155	525328	502428	468072	501464	535689	479296	496130	586697	511123	579155	556233	558302
Bradi1g56910.1	1.60268e-05	6.30327e-05	0.036971	2.89301e-05	0.000105712	1.19989e-05	1.19989e-05	0.614654	0.063042	0.614654	0.13849	0.207743	0.063042	MASSADPATEPYVVEDCRGVLQLLSDGTVVRSAALPFPAGNDDGLDNDGRVEWKDAVYDAGRGLGLRMYKPAAAEKKLPVLVYFHGGGFCIGSYAWPNFHAGCLRLAASLPAVVLSFDYRLAPEHRIPAAHEDAAAALLWLRSQLASDTSNPWLADAADPRRVFVSGESAGGNLAHHLALRFGASGLDPVAHIAGYILLMPAFMSEQPTRSELDSPATAFLTRDMCDRYGRLSFPAGANRDHPLLNPLGPESPSLDPLLDVAMLVVAAEGDLLRDKNVEYAERLKALAAEKGKGKEENVELVVFQGEEHAFFGVKPMSEAAGELVRVIGRFVARSGSGTGGGQMS	11696.4	18688.3	11394.5	8715.13	12623.6	5852.33	4713.56	9966.27	10504.4	7759.14	1052.46	2586.31	1873.25	1480.98	1748.25	2771.62	2159.52	2797.66	2761.07	2622.47	683.126	2463.92	0	36.2205	795.817
Bradi1g57760.1	0.0186058	0.0269884	0.655964	0.460549	0.0120957	0.0253824	0.0120957	0.813496	0.409667	0.813496	0.761499	0.409667	0.47334	MPSLLILSLLLSTAVLNLAALATGEDEFVFTGFKGANITIDGVATVTSNGLLDLTNAHERLKGHAFYPAPLRFRESPNGTVKSFSVSFVLAIYPNYRPSQGMTFFIAKSMDFSSALPVQYFGVFNSVNQGNSSNHIFAVEFDTVVNMDLRDIDANHVGVNINSAISKKSSTAGLYDDRTGSFSTLNLTGGEGLRVWVDYERESTRINVTISPVSMAAKPARPLISAIYNLSTVITEDAYLGFGSAAGKDGSRHYILGWSFGMNSPAPSIDISKLPRLPRLSPKPRSKVLEIVLPVATAAFVLVLGIIIFLFVRRHRRYAELKEDWEVEFGPHRFPYKDLYYATQGFKNKNLLGVGGFGRVYKGVLPKSKLEIAVKRVSHESKQGMKEFIAEVVSIGRLQ…	24919.8	12240.3	13146.2	16847.4	16788.4	19310.8	17316	4455.6	13546.9	13657.3	13539.3	12513.9	11795.4	13288.9	12784.4	9319.2	5168.08	6251.96	6771.44	6877.67	6641.11	6871.65	9050.12	9223.69	7946.64
Bradi1g58190.1	0.120643	0.141262	0.99999	0.415221	0.0765694	0.683131	0.0765694	0.991543	0.640554	0.991543	0.788169	0.640554	0.849014	MPEQSENAAESMVSGIMDAIADKLPKQKSVRFDDEPGSSISGQAKRLFGGHKSVHHILGGGKSADVLMWRNKKMSSSVLAGATVAWVFFEWFGYHFLTIVSFVLVLGMVAQFGWSSFSGMLNGSSSNVPRVELPEELFANAGAAIGAQVNRFLGSLQDVSCGRDLKQFLKVIVGLLAAAFVGGWCNLITVIYIGFVCAHTLPVFYEKYHDQVDEVVNNMLGLIGSQYQKLDKGVLSKMPKGNLKFKKSQ	122145	187582	145082	99348.4	138539	129787	132537	130160	156988	137368	98341.7	71644.7	107579	159205	109193	56857.2	91050.4	105180	101880	88742	99595.6	124081	147874	98937.6	117622
Bradi1g58380.1	0.00833356	0.0134313	0.0250001	0.0155874	0.00415133	0.00836303	0.00415133	1.386	1.3007	1.3007	1.32449	1.386	1.35546	MDIASFVTSLLTSFVIFVVLVLVFAWLSRRPGNAPVYYPSVLLRGLDPWEGRGKGTRSPVGWVRQAFSAPEADVIAAGGVDAAVYLVFLSSVLAILVLSGIVLLPVLLPLAATDHALEDPSGSRNGSTSQNFTVIERLALGNVQKKSMRLWAFILSVYWVSFVTYFVLWKSYKHVSNLRAAARSSSDVKPEEFAVLVRDIPVPPPDQTIKDSVDSYFRALHPDTFYKSMVVTDNKEADKIFQEIEGHKQKIAHAEAVYAESKKANKPEGSKPTHRTGFLGLIGKKVDTIEYCNEKIKELLPKLEDEQKNTLQEKQQRAAIIFFNSRAAATSASQTLHAQLFDKWTVTEAPEPREIIWPNLPRKIYDRQIRQSVVYFIVFLTVFFYTIPITAISAVTTLE…	4.44622e+06	4.02052e+06	4.4364e+06	4.10164e+06	4.2512e+06	6.92705e+06	5.73188e+06	4.689e+06	4.77019e+06	5.52953e+06	5.29435e+06	5.74343e+06	5.49381e+06	5.99099e+06	5.63065e+06	5.66807e+06	5.8321e+06	6.29561e+06	5.77287e+06	5.89216e+06	6.65378e+06	5.13977e+06	5.69755e+06	5.55828e+06	5.76234e+06
Bradi1g58430.1	0.000141211	0.000383287	0.958508	0.000692616	0.331894	0.992732	0.000692616	1.65721	0.777905	1.07015	1.65721	0.777905	0.956848	MEGGAHGFDGSAFRECFSLSWRNPYVLRLAFSAGIGGLLFGYDTGVISGALLYIRDDFRSVDKNTWLQEMIVSMAVAGAIVGAAAGGWANDRFGRRASLLAADVLFFAGAAVMASATGPAQLVAGRVLVGLGVGVASMTAPLYISEASPARIRGALVSTNGFLITGGQFLSYLINLAFTRAPGTWRWMLGVAGVPAVVQFALMLFLPESPRWLYRKGREGEAEAILRRIYTAEEEVAREMAELKESISSESETKATGLAAAMGNAAVRRALVAGVGLQVFQQLVGINTVMYYSPTIVQLAGFASNQTALALSLVTSGLNALGSVVSIFFIDRTGRRKLLVISLAGVVATLALLSAVFHQATSHSPLVGAAQTARFDASLTCPAYRSSLSSSSSSQAIWD…	53633.1	45036.9	64394.8	48784.9	52962.4	68153.6	65003.3	36752.2	56802.7	56677.9	83791.6	93288.8	79829.7	94170.3	87770.1	44060.3	43268.7	48680.5	28789.3	41199.7	58758.6	34441.4	57519.2	51988.9	50677
Bradi1g58480.1	0.0442957	0.0582406	0.41485	0.959466	0.737813	0.272509	0.272509	1.29319	0.649546	1.29319	1.10177	0.807743	0.649546	MGEVTVTNVTEYQAIAKQKLPKMIYDYYASGAEDEWTLQENREAFARILFRPRILIDVSKIDMTANVLGFKLSMPIMIAPSAMQKMAHPDGEYATARAASAAGTIMTLSSWATSSVEEVASTGPGIRFFQLYVYKNRKVVEQLVRRAEKAGFKAIALTVDTPRLGRREADIKNRFVLPPNLTLKNFEGLDLGKMDQANDSGLASYVAGQIDRTLSWKDVKWLQTITTLPILVKGVITGEDARLAVENGAAGIIVSNHGARQLDYVPATISALEEVVQGAAGRLPVFLDGGVRRGTDVFKALALGAAGVFIGRPVVFSLAAAGEAGVSNVLKMLKDEFELTMALSGCSSLADITRNHVVTEAEKLGVMPSRL	21596.6	20667	24861.9	38783.3	26477.2	30406.9	49655.1	28490.3	28407.6	34240	34870.3	31238.3	22746.6	27831.6	29171.7	25362.8	28435	17774.5	13974.8	21386.8	11383.5	14145.9	23226.6	20036.5	17198.1
Bradi1g58800.1	0.142308	0.164784	0.996143	0.870795	0.785863	0.108356	0.108356	1.27838	0.967697	0.967697	1.08908	1.10728	1.27838	MEEGRETAAKRAKDCPSPTSAGEEGGEDHLSALPDDILLRIFHTLGSAETAARTSVLSRRWLRLWALQPALSFFFGARHDKVPAALAALDAAHAALDAARGDDDEATPPLRFLVVFVSRSSAESLQAWLPIAARRLAGDLHFIEIPRHEEEEEGDEAARDGGAFELPCFERATAISLELVRGFHGLSLPPTGVFARLTNFHLDGARLHGPCTLGEAVSSPRCPTLRRLSIVSVGGIGNLAVHSDSLLEMELKGCELQQLTVAAPALIKLTVFLCFSSATRPVADISAPELVTLGWRDAYDPTSVHFGEMSQLQWLGTSFFIVYGQPGLAQNLDCARLLQHFEAVQALNLVLAYMSSMEGMQDHNYLMEEMTRLPDIRFLTLFLLTTGHSFGASSFHVFR…	22638	17422.4	33556	23782.7	24349.8	20639	21077	23902.5	28634.5	23563.2	25668	27782.7	25009.5	27615.3	26518.8	31004.6	25929.5	22658.4	28256	26962.1	28086.9	28387.9	35580.8	32457.3	31128.2
Bradi1g59010.1	0.335421	0.359113	0.789691	0.189773	0.266936	0.600782	0.189773	0.922061	0.824869	0.922061	0.824869	0.843445	0.896448	MSKARVYSDVNVVRPKEYWDYEALAVQWGEQDDYEVVRKVGRGKYSEVFEGINVNNNEKCVIKILKPVKKKKIKREIKILQNLCGGPNIVKLLDIVRDQHSKTPSLIFEYINNTDFKVLYPTLTDYDIRYYIYELLKALDYCHSQGIMHRDVKPHNVMIDHELRKLRLIDWGLAEFYHPGKEYNVRVASRYFKGPELLVDLQDYDYSLDMWSLGCMFAGMIFRKEPFFYGHDNHDQLVKIAKVLGTDGLNTYLNKYRIELDPQLEALVGRHSRKPWSKFINADNQHLVSPEAIDFLDKLLRYDHQDRLTAREAMAHPYFLQVRAAENSRTRAQ	39041.9	52160.6	53670.6	60153	51256.5	44921.2	44551.8	48077.4	51496	47261.6	42558.1	50955.2	29183.5	46422.9	42279.9	39194.9	44518.9	43550.3	45663.9	43232	40289.9	48806.8	44678.4	50019.9	45948.8
Bradi1g59110.1	1.24595e-05	5.1403e-05	0.00367531	0.000116499	3.46261e-06	1.20177e-05	3.46261e-06	0.69965	0.458182	0.69965	0.534435	0.458182	0.483636	MSDSEEHHFESKADSGASKTYPQQAGTIRKSGHIVIKGRPCKVVEVSTSKTGKHGHAKCHFVAIDIFNGKKLEDIVPSSHNCDIPHVDRQDYQLIDITDDGFVSLLTENGGTKDDLKLPTDDALLTQIKDGFDAGKDLILSVMSAMGEEQICAVKEIGGGK	52605.2	44148.5	41276.7	31215	42311.3	25338.1	28027.3	31731.7	33315.4	29603.1	22836.9	22702.5	19908.5	25002.8	22612.7	19186.7	19373.1	21216.7	17768.6	19386.3	22023.8	18868.1	20765.8	20195.5	20463.3
Bradi1g59120.1	0.523071	0.544462	0.963932	0.698994	0.305136	0.613687	0.305136	0.933845	0.774202	0.933845	0.862728	0.774202	0.845513	MATNPDQVRPSRAGRTTTLLLAALVAAVASSLPAPAAAANYTVGDEKGWNPKVDYTAWVKKHKPFYKGDWLLFQYQNGRSDVVQVDEVGYDNCDKESAISSHSKGTSFAFQLKEAKDYFFICSYGYCYSGMKLAVTAKKGSASSSTSPSSPSSDDSDSDDSDSSSEKSPAAKKSSSNLRRAAQDALIQFAEIRPFASSDLEALFLSDSSLFRYVMVIVRLISAFFFLFSPFD	177338	248316	414987	378927	304892	223388	289264	297712	328525	284722	245732	303686	254964	247775	263039	224031	225973	233991	260197	236048	301244	242611	269656	217650	257790
Bradi1g59210.1	0.0058009	0.00972257	0.924938	0.0107702	0.288914	0.00717845	0.00717845	1.51356	1.08525	1.08525	1.48505	1.23805	1.51356	MPGRRRKLQVAALLLLFCVCSSAGIICRAQLVDQFKPADSYLVNCGSAKGTTVSERNFAADGAAPLTVSTPQEILAGTSANGVSSFDNSALYQTARIFTGPSSYTFPINKQGRHFVRLYFFPFIYQSYDLSTAKFTVSTQDVLLLSDFQQPDKTAPLFKEYSLNITRDQLIISFKPSNGIAFVNAIEVVSVPDDLIADVAQMVNPVQQYSGLSTQSLETVYRVNMGGPKVTPNNDTLSRTWLNDQKFIMNPSVTKKVVYGKTIKYKNGGASSLTAPDVVYSTATELAASNTSNALFNMTWQFDVDAGFSYLIRFHFCDIVSKALNQLYFNAYVGGFFAQHDLDLSEQSMNQLATAIYVDVVLSSNDASSKLSISIGPSTLNNAFPDGILNGLEVMKMGS…	29516.7	18112.4	26013.7	23440	24270.7	28241	29369.9	23555.4	24192.8	26339.8	37570.2	32193.1	30547.6	43862	36043.2	25217.5	36648.1	30543.8	27783.5	30048.3	43092.7	32435.2	35144.9	36268.1	36735.2
Bradi1g59220.1	0.00134122	0.00272486	0.608612	0.408424	0.516475	0.00316448	0.00316448	1.13093	0.537766	1.13093	0.832672	0.853069	0.537766	MMGRKALDYEELNENVKKVQYAVRGELYLRASELQKEGKRIIFTNVGNPHALGQKPLTFPRQVVALCQAPFLLDDPNVGLIFPADAIARAKHYLSMAPGGLGAYSDSRGIPGVRKEVAEFIQRRDGYPSDPELIYLTDGASKGVMQMLNAIIRNERDGILVPVPQYPLYSAAISLFGGSLVPYYLEEEANWGLDIVTTRQSVAAARSKGMTVRAMVIINPGNPTGQCLSEANIRELLNFCYQENLVLLADEVYQQNIYQDERPFISARKVLFDMGPPISREVQLISFHTVSKGYWGECGQRGGYFEMTNIPPKTVDEIYKVASIALSPNVPGQIFMGLMMNPPKPGDISYLKFATESKSILDSLRRRAQIMTDGFNSCQNVVCNFTEGAMYSFPQIRLP…	79980.6	94978	96347.7	116861	97041.9	120230	136040	91995.7	90723.1	109747	82862.3	91625.1	71057.7	77671.2	80804.1	98122.2	100635	64532.1	67844.4	82783.5	55722.3	49037.3	46621.3	57362.7	52185.9
Bradi1g59280.1	0.00116351	0.00240733	0.240173	0.00651446	0.000811954	0.802666	0.000811954	0.911948	0.508035	0.811927	0.617122	0.508035	0.911948	MVSGSGISARRVVVDARHHMLGRLASIVAKELLNGQRVVVVRCEEISVSGGLVRQKMKYLRFLRKRMNTKPSHGPIHFRAPSRIFWRTVRGMIPHKTPRGEAALARLKAYEGVPPPFDRTKRMVIPDALKVLRLQAGHKYCQLGELSKEVGWNYQDTIRELEEKRKEKAKVSYDRRKQLAKLRVKAEKAAEEKLGSQLDILAPIKY	76582.9	97022.4	109449	90788.6	93460.8	69958.3	70682.3	84317	78575.8	75883.4	52182.8	59242.9	54065.4	65215.5	57676.7	42334.8	46082.2	46902.4	54606.2	47481.4	52108.6	92936.7	84347	111533	85231.4
Bradi1g59331.1	0.110038	0.130097	0.99995	0.889765	0.0907395	0.259329	0.0907395	0.986551	0.634308	0.986551	0.893735	0.634308	0.727564	MWYKEDLRSQEKIIYYLARLKSKEILRYSGNGLVLSRDWAKKICLALGQKNSFSRGFDKILALLLASLRENSPVIRAKALRAVSSIVEADPEVLGDKRVQSAVEGRFCDSAISVREAALELVGRHIASHPDVGLKYIEKVAERIKDTGVSVRKRAIKIIRDLCASNPNTDTTHAFVEIISRVNDEESSVQDLVCKTFYELWFDEPIGSHKHLVADGSSVPMEIAKKTEQIVDMLKKMPNHQPLITIIKRSLTLDFLPQSSKASGINSSMMSSLRKRCELICKRLLERILQVEEGADNEAKVHTLPYVLVLQAFCIVDPTLCTPVTDPSQFVVTLQPYLKNKVDSKSTAQLLESIIFVIDSVLPLIRKPPQTVVEELEQDLKQMIVRHSFLTVVHACIKC…	538173	373551	261841	326455	375005	425911	346621	428929	278384	369961	408865	353555	284506	293693	335155	204364	337992	180257	228860	237869	353766	311696	209171	216727	272840
Bradi1g59380.1	0.000829113	0.00179819	0.903072	1	0.00147778	0.393458	0.00147778	1.05502	0.631685	1.05502	0.997866	0.631685	0.87586	MASPAGVLLLAATLLLTTAAMLASAADSSTTTHLHFFLHDMVSGSNPTAVQIIKGPASTSASAFPGIAFGDTTVVDDALTETSSPSSAAVGRAQGYYMMSSQSGPVLMMCVNLLFTTGAYNGSTLAVLGRDDILETTRELPVVGGTGKFRMASGYVLWKTSNSSGPDATIELDVYVAMANGTGTIDASAPVSPIDGGGGAGGGAAGKSASGAAAAAAYGRWVSAFVVAVLVAMVGGVW	316768	300800	422169	420586	365081	386094	356544	419802	378239	385170	385401	373592	326968	371247	364302	233691	292890	190208	205676	230616	356167	345622	287274	289977	319760
Bradi1g59420.1	4.39112e-07	3.97253e-06	5.35733e-05	1.79792e-09	5.56739e-06	0.000347047	1.79792e-09	0.635486	0.250697	0.560275	0.250697	0.494015	0.635486	MGRKWSMFAGGLTFLVGAALNGAAENIAMLIIGRILLGVGVGFANQSVPVYLSEMAPARLRGMLNIGFQLMITIGILAAALINYGTNKIKSGYGWRVSLALAAVPAGIITLGSLFLPDTPNSLIERGHPESARAMLARIRGADVDISAEYGDLVVASEESKLVTHPWRNILERRYRAQLTMAIAIPFFQQLTGINVIMFYAPVLFETLGFKGDGALMSAVITGLVNVFATLVSVFTVDRLGRRKLFLQGGSQMLLSQLVVGTLIAVRFGTSGVGEMPKGYAAAVVLFICVYVAGFAWSWGPLGWLVPSEIFPLEIRPAGQSINVSVNMLFTFVIAQAFLTMLCHLKFGLFYFFAGWVVIMTVFIALFLPETKNVPIEEMVLVWKGHWFWKRFIADEDVH…	41611.3	33128.1	30686.1	39159.9	36146.3	19908.9	19070	20923	21105.7	20251.9	10259.1	11358.7	7700.69	6928.58	9061.77	19941.3	18160	19076.8	14249.2	17856.8	20158.2	22034	30270	19419.9	22970.5
Bradi1g59510.1	0.058104	0.074296	0.480972	0.113685	0.988653	0.156655	0.113685	2.29671	0.79702	1.77323	2.29671	0.79702	2.19295	MAMAKGAVFFVAVVAMAALAGLEAATVHPVGGAGKNWDTSGDYDTWSAQQKFTQGDSLVFTYPSSHDVVQTTKAGYDACSAASTDKSFTGGKTTIKLSTAGKQYFICGVPGHCAAGMKLAVNVVAAAATPAAKAPAKPRGQRSVAPVAAPAPAPAMAPAATDDQLPTVTSPTGSPTPKPSAAATIAGAKAAAVALAVAMAAALAM	6293.12	5874.41	8039.74	7925.39	7033.16	20454.9	19819.3	3582.05	6029.46	12471.4	17069.9	12791	17473.9	17277.6	16153.1	2253.59	3882.7	6840.14	9445.84	5605.57	27014.6	11039.6	14213.2	9426.22	15423.4
Bradi1g59620.1	0.873495	0.878706	0.852821	0.999992	0.997635	0.999774	0.852821	1.13499	0.958837	1.13499	0.990169	0.958837	1.0226	MTMSSPMQSSFLPATTESIAMAQEAKDASESISILYRVLEDPSSSSDAVRTKELAITNLTTYLTKENRAEELRNLLTQLRPFFALIPKAKTAKIVRGIIDAVAKIPGTSDLQISLCKEMVEWTRAEKRTFLRQRVEARLASLLLESQEYTEALALLSGLIKEVRRLDDKLLLVDIDLLESKLHFSLRNLPKAKASLTAARTAANAIYVPPAQQGTIDLQSGILHAEEKDYKTAYSYFFEAFEGFNALEDAKAIFCLKYMLLCKIMVNQADDVAGIISSKAGLKYVGPDVDAMKAVADAYSKRSLKYFETALRDYKAQLEEDPIVHRHLSSLYDTLLEQNLCRLIEPYSRVEIAHVAEMIELPIDHVEKKLSQMILDKKFAGTLDQGAGCLVIFEDPKTE…	16093.7	22228	21895.9	17377.1	19398.7	24465.2	16309.5	23943.1	23351.6	22017.4	18778.9	19922.7	16755.6	21374.8	19208	22641.7	10915.4	19676.6	21167.1	18600.2	29238.3	19207.2	20376.2	10526.6	19837.1
Bradi1g59670.1	0.726963	0.736794	0.890638	0.571802	0.55684	0.789848	0.55684	0.760458	0.574108	0.760458	0.581922	0.574108	0.696905	MDASVLAALAALILASIFLLSKQRSSAREDHRRQQLPPGSLGLPVIGQTLGFLNALRSNTAEAWLRQRAATHGPVSRFSFLGVPTVLIVGPSANKFFFSSPGLTAKTTMAANRMVGKRNIRELTGSDHRRVRAMFVKFLKLDAVRGYVASIDDEVRHHLSTEWRGHATVAVMPSMKSLTFDIMCTAIFGLDRGAHAAVRQKLSVEFQQLVRGTLSVPLNLPFTTFRKCLAASRRGRQTVARIMEEKRAKLERGEISPSDDLMTHMLSEGVADEDIIDNVIFMMLAAHDTTAILLTFLIRHLDNNRDVYTRVVAEQEEVARSKAPGESLTWDDLGKMRYTWAVAMETLRLVPPVFSNTRRVVDDVEFNGHLIPKGWQVMSAVNLTQWDPAIFPDPDKLDP…	3390.53	2650.72	233.361	656.422	1732.76	1640.57	584.921	1289.64	1755.63	1317.69	927.669	1518	884.333	703.321	1008.33	1041.8	836.888	628.128	1472.34	994.79	851.312	241.177	2058.45	1679.33	1207.57
Bradi1g59710.1	0.298911	0.323361	0.239065	0.85361	0.996542	0.887344	0.239065	1.51649	0.927089	1.51649	1.2161	0.927089	1.19731	MGPAGRLLGAAALLSCLCLHGLLGNSGPAFAQGRPALHWIDHAEEEDGAGAGGLMPQLSPAGSPKPFVPFLAPTPLAPFYNNTTPKLSGKCSLNFSAIDGLMTTTAVDCFASFAPLLANVICCPQLQATITILMGQSSKQTGSLALDPTAANYCLSDVQQLLLSQGASDNLHSICSVHLSNVTEGSCPVSSVDAFESAVDSSKLLEACQKVDPVNECCTQTCQTAINDAAQKISAKEGAVLKSYNGSTKVDSCRNVVLRWLASRLEPSSATKMLRQISNCNVNGVCPLSFPDTSKVAKECSGTIKNSTVCCKAMESYVTHLQKQSFITNLQALDCASFLGKKLQMMNVSMNVYSSCQTSLKDFSLQVGSQESGCLLPSMPSDASFDPSSGISFTCDLND…	8114.22	8637.51	20885.2	11880.4	12379.3	19762	16461.3	15619.8	23249.3	18773.1	12492.2	14033.4	13441.5	20250.9	15054.5	5652.8	5294.93	16800.3	18159	11476.8	15781.4	11205.4	19247.1	13054	14822
Bradi1g59870.1	0.00948926	0.0148849	0.923488	0.471705	0.0796436	0.156732	0.0796436	1.25164	0.860335	1.06304	0.860335	1.25164	1.21299	MASDGSGVVALYGGNNNNSILDSKSPFAVKAGLAQMLRGGVIMDVVTADQARIAEEAGACAVMALERVPADIRAQGGVARMSDPGLIRDIKRAVTIPVMAKARIGHFVEAQILEHIGVDYVDESEVLTLADDAHHINKHNFRVPFVCGCRNLGEALRRVREGAAMIRTKGEAGTGNVVEAVRHVRSVMGDVRALRAMDDDEVFSYAKSIAAPYDLVLQTKQLGRLPVVQFAAGGVATPADAALMIQLGCDGVFVGSGIFKSGDPARRARAIVQAVTHYSDPAVLAEVSCDLGEAMVGINLSDPKVERFAARSD	631983	509545	508067	530641	545059	684409	572784	552490	508004	579422	519038	428173	375019	553503	468933	711529	789662	642474	585203	682217	623707	561454	721418	738022	661150
Bradi1g60110.1	0.000448548	0.00104326	0.173578	0.000199472	0.114066	0.00121959	0.000199472	0.752119	0.327544	0.752119	0.327544	0.722699	0.440905	MAPAATSSWAAFLLWFCVAATAAWAHGGGGDDGDADGGGGGDKADLRAPGLVATKLWCLAVVFLGTLAGGVSPYFMRWNEAFLALGTQFAGGVFLGTAMMHFLSDANETFGDLVKDSAYPFAFMLACAGYVVTMLAECVISSVVARGRTTPDGAAAGSTSAGVLEEGKLGTTNGNSSEPQAADAHGSSTDHSVPSMLGNASTLGDSILLIAALCFHSVFEGIAIGVAETKADAWKALWTISLHKIFAAIAMGIALLRMLPNRPLLSCFAYAFAFAISSPIGVGIGIVIDATTQGRVADWIFAISMGLATGIFIYVSINHLISKGYKPQRPVAADTPVGRWLTVVLGVGVIAVVMIWDT	73445.7	40868.5	50379	55959.9	55163.2	32763.2	30824.5	56655.9	45713.6	41489.3	21437.6	15425.6	18578.3	16832.1	18068.4	38489.5	30691.7	52433	37851.5	39866.4	30234.4	20998.7	26969.2	19084.8	24321.8
Bradi1g60207.1	0.086147	0.105456	0.454358	0.0248927	0.632757	0.713111	0.0248927	1.30963	1.10075	1.14101	1.30963	1.11291	1.10075	MDEDFARAVEDGLKLSKRLVLPGGAPPPRPPAGMDRAAAWDAAPLLPTAPMAYAVVTDPGTVDSPDVPSYQPHVYGRLNPPALIPLQMREIDLRVDCVAGCATAEVTVRARWWLHCITRSRDCDCRVVVPMGEQGSLLGAEVTVGKRSYNTHVIDVEDNSAVSIAKTESGALLKSQFFSLTIPQVVGGEDIFATIRWSQKLLYDNGQFSVDIPFRFPQYVNPLPKLFTKREKIQLTVNSGVSKEVLLQGTSHPLKEKGRQGDKLSFLHEAIVESWSIKDFTFAYSVYSADLSGGVLVQPSTLRDYDDRDMFCIFLLPGNNQNRKVFRKAVVFIVDTSGSMQGKPIENVKSAVSTALSELVQGDYFNIVTFNDELHSFSSCLEQVNDKTTENAIEWMNLH…	183628	151337	171214	168705	168721	177032	233542	147069	212404	192512	222667	214056	201813	245316	220963	174590	160235	226469	189795	187772	192426	174676	192889	182887	185719
Bradi1g60310.1	2.22578e-06	1.43664e-05	0.0135969	6.45029e-05	6.20389e-07	8.43679e-07	6.20389e-07	0.614363	0.0644728	0.614363	0.304626	0.0644728	0.089219	MAAAAAGGAPRALSQREQDIQMMLAADVHLGTKNCDFQMERYVFKRRSDGIYIINLGKTWEKLQLAARVIVAIENPQDIIVQSARPYGQRAVLKFAQHTGANAIAGRHTPGTFTNQLQTSFSEPRLLILTDPRTDHQPIKESALGNIPTIAFCDTDSPMRYVDIGIPANNKGKQSIGCLYWLLARMVLQMRGTILPGHKWDVMVDLFFYRDPEEAKEQDEEEALVAPEYGAPPVDNWGDLPALSAAPTGAEWGSAVPAPVAGEGWEAPSVPLPADASVPAPGPAPATGWEEGSAPAATGWQ	9135.75	9320.81	8232.72	4259.57	7737.21	4353.89	3599.42	5904.48	5156.02	4753.45	2586.5	3268.2	1465.94	2107.19	2356.96	1158.16	216.021	621.181	0	498.839	460.863	0	1162.94	1137.43	690.306
Bradi1g60320.1	2.9875e-05	0.000106617	0.000573878	0.00207866	1.64354e-05	4.50459e-05	1.64354e-05	0.423468	0.0945974	0.333325	0.423468	0.0945974	0.10862	MGEAAGDRVLSRLQSVRERIGDSLSAHPNELVAVFTRLVNLGKGMLQPHQIISEYNTAIPEAAREKLKDGAFEDVLRAAQEAIVISPWVALAIRPRPGVWEYIRVNVSELAVEELSVPEYLQFKEQLVEGSNKDFVLELDFEPFNASFPRPSLSKSIGNGVQFLNRHLSSKLFHDKESMYPLLNFLRAHNYKGMTMMMNDRIRSLSALQGALRKAEEHLSGLPADTPYSDFHHRFQELGLEKGWGDCAKRAQETLHLLLDLLEAPDPSTLEKFLGTIPMVFNVVILSPHGYFAQANVLGYPDTGGQVVYILDQVRAMESEMLLRIKQQGLDITPRILIVTRLLPDATGTTCGQRLEKVLGTEHTHILRVPFRTENGIVRKWISRFEVWPYLETFTDDVA…	18668.6	30032	50014.1	31474	32547.2	10586.3	13406.6	8675.67	10726.6	10848.8	11601.5	12504.1	15049.5	15975.6	13782.7	5060.67	801.902	4613.83	1839.11	3078.88	2687.33	4311.86	4852.23	2289.62	3535.26
Bradi1g60730.1	2.70961e-09	8.83485e-08	5.114e-05	5.06832e-08	1.09901e-12	3.63487e-12	1.09901e-12	0.636204	0.184427	0.636204	0.45567	0.184427	0.25389	MKFNIANPTTGCQKKLEIDDDQKLRVFFDKRISQEVLGDHLGEEFKGYVFKIMGGCDKQGFPMKQGVLSSGRVRLLLHRGTPCFRGYGRRDGERRRKSVRGCIVSQDLSVINLVIVKKGDNDLPGLTDTEKPRMRGPKRASKIRKLFNLAKDDDVRKYVNTYRRTFTNKNGKKVSKAPKIQRLVTPLTLQRKRARIAKKKQRIVKKKSEAAEYQKLLAQRLKEQRDRRSESLAKKRSRLSTAKAAPAATA	175440	238969	220224	190154	206197	124328	150778	114405	135222	131183	100917	96982.7	77413.2	100518	93957.8	48096.7	47557.7	37773.4	18685.2	38028.3	50726.2	46841.6	59134.1	52703.2	52351.3
Bradi1g60970.1	0.116757	0.137081	0.999987	0.737998	0.421104	0.441486	0.421104	1.20998	0.682004	1.0138	1.20998	0.682004	0.68978	MALAGAATILLLVLALAAAASAATPAPAPAVDCQEAFLALSDCLDYVQPGSSTARPGKTCCGEVKTAVSNPGIVDCLCAAIASKQVQLPVNMTRVLALPAACGGSNAVFSKCHVMPGGAPTEAPAPSPSAGGPSSSGGATGSPPKAAATRSPVMATLLVATVAAPLLAFYYL	253914	94894.3	112036	90085.4	137733	167776	173767	93949.3	123039	139633	167591	157666	149324	192034	166654	101261	122978	95274.6	56223	93934.1	108985	106529	70327.8	94178.9	95005.2
Bradi1g61430.1	8.15882e-10	3.79526e-08	0.581689	0.860759	2.25925e-11	1.11798e-06	2.25925e-11	7.15771	0.389309	0.389309	0.615092	7.15771	5.43185	MASVLLVALATLLALAVSRLWSYAVVRLAWRPGAVVRRFREQGVHGPPYRFLRGCNEDVRRMKAEADGLELDVRDHDYLPRIVPHYVKWKDQYGKGLGTVDGSEWARHRKVVTPAFAMDKLKKKLQNMLSEMIQCRLASKQSGFGDLLGVMLEASFTKEQGEKQDELILTVDEIIDECKTFFFAGHETTSHLLTWTMFLLSVYPEWQERLREEVLRECGKGNPKADMLSKLKEMTMVLLETLRLYSPIMFMLRKPISDMKLGNLNLSKGNVIVIPIPMLHRDKEVWGDRANEFDPMRFENGVTKAAKIPHALLGFSMRPRSCIGQNFAMLEAKLVMAMILQKFSFTL	4814.57	2401.72	4117.83	1412.78	3186.73	1237	1104.12	900.016	1721.36	1240.62	2258.97	810.112	2045.83	2725.61	1960.13	22674.1	20727.9	23379.7	24457	22809.7	12207.2	16236.2	23149.6	17646.4	17309.8
Bradi1g61510.1	0.0391016	0.0522258	0.229474	0.0253589	0.895091	0.997794	0.0253589	1.24503	1.01843	1.14869	1.24503	1.05473	1.01843	MASDVPMTPELEQIDGEIQDIFRALQNGFQKMDKIKDSNRQAKQLEDLTGKMKECKRLIKEFDRTLKAEESKNPPEVNKQLNDRKQYMIKELNSYVTSRKTYQSTLGNNKRVELFDMGATSSEPAAEDNIQMASAMTNQQLIDSGRNQMDQTDEAIIRSKMVVAQTLDVGAQTATTLTQQTDQMKRIGDELDSVHFSLKKASQLVKEIGRQVATDKCIMALLAVIVFGVIAIIVVKIVHPQNKNIPDIPGMAPPAQNFQTNRRLLSANAFGGL	113863	113579	123918	130919	120570	159249	147759	114377	132604	138497	144565	163733	141036	151115	150112	142312	139445	115870	111048	127169	122565	108916	134914	124770	122791
Bradi1g61690.1	0.110779	0.130859	0.59763	0.58116	0.304185	0.773385	0.304185	1.11627	0.784058	0.84939	0.846193	0.784058	1.11627	MPRPWRPVLASATKCCAAEDAVVTAGAGQGLARCRPARSEFSRRLASFRRLSSMANSPATPMDGKDVDDDDDADGEAGQMGVGALQLHSFSLSELRGVTHDFSSGYLLGEGGFGTVHKGFVDAGMRPGLEPQPVAVKQLDIAGHQGHREWMAEVIFLGQFRHQHLVKLLGYCCEDEERLLVYEFMPRGSLENHLFKRISATLPWGTRLKVAIGAAKGLAFLHGAHKPVIYRDFKASNILLDSEFTAKLSDFGLAKMGPEGEDTHVTTRVMGTHGYAAPEYVQTGHLTMKSDVYSFGVVLLELLTGRRAMENVRGRTAHAEQTIKLVEWTRPYLASSRRLRCIMDPRLAGHYSVKGARAVAHLACECTALQPRDRPRMAAVVESLERLQGFKDMAVSVGL…	16884.7	16434.9	23312.8	28121.5	21188.5	15917.4	17293.3	17430.5	21347.9	17997.3	11429.1	22037	16892.8	21359.1	17929.5	15599.7	15845.9	18259.3	16747.1	16613	19213.9	23008.2	25791.3	26595.1	23652.1
Bradi1g61790.1	0.156536	0.178955	0.995742	0.082478	0.971852	0.637542	0.082478	3.61806	1.29221	1.29221	3.61806	1.48957	2.19033	MKYKKGDGADQPNDDGGMNGSRDAPPSIELDIIQHHGGGGGGLGSGGGGSTSFFEPTWREDTPVSGGSGQGCSSGRRGGREPPEKRLTLFALRLAVLEKAASGLGTLAFAWATVVLLGGFASDLTNTDFWCVTVILVGEGARVFSRSHELEWQHHATLTSTAGGALRSSSRVIRRFVHALAAPDDTRARAAQFQRQVVLLMKQRTWHAPDVSLLPYTGWVFLSKRIGRVLNWLQVLSASACVALSVMRLWKHDYFGAGAENKKDNMRPALLLFYTVALVEASLFLLEKLYWIWKVSVCKLLDQVSADCDLGAYGLVSLKRFFYDAYSRCISGSIFDGIKMDLVTFAEELILSDFLDEQLIGVRILQRFANSKSGSAGDTLRKVGTNPRSIERVVEMLNW…	25190.5	19918.4	21283.9	25129.8	22880.7	30342.3	34040	24327.1	29556.7	29566.5	44397.2	45960.2	63249.7	177528	82783.7	25053.7	26449.6	42969.9	41856.7	34082.4	29092.1	29577	112771	29024.8	50116.1
Bradi1g61930.1	0.000173803	0.000460629	0.0531311	2.51668e-05	0.133448	0.00317681	2.51668e-05	1.57048	1.19284	1.23719	1.57048	1.19284	1.36305	MGATESVPETSVHEFTVKDCNGKEVCLEMYKGKVLLIVNVASKCGFTETNYTQLTDLYQKHRDKDFEILAFPCNQFLRQEPGSDQQIKDFACQRFKAEYPVFQKVRVNGPDAAPLYKFLKASKPGLFGSRIKWNFTKFLVDKNGKVINRYATATTPFAFEKDILKALEEVPNLQKDTPKASEEVPDLLKDTPKAPESE	972148	1.03456e+06	1.21073e+06	1.18275e+06	1.10005e+06	1.53631e+06	1.59447e+06	1.14493e+06	1.16817e+06	1.36097e+06	1.52792e+06	1.79252e+06	1.75947e+06	1.83051e+06	1.72761e+06	1.26106e+06	1.38231e+06	1.27753e+06	1.3278e+06	1.31218e+06	1.52329e+06	1.47318e+06	1.55476e+06	1.44648e+06	1.49942e+06
Bradi1g62210.1	0.00928061	0.0146427	0.958285	0.285248	0.0858847	0.0208339	0.0208339	2.19586	0.805807	0.805807	1.65191	1.9175	2.19586	MSGHDSKYFSTTKKGEIPELKEELNSQYKDKRKDAVKKVIAAMTVGKDVSSLFTDVVNCMQTENLELKKLVYLYLINYAKSQPDLAILAVNTFVKDSQDPNPLIRALAVRTMGCIRVDKITEYLCDPLQRCLKDDDPYVRKTAAICVAKLYDINAELVEDRGFLEALKDLISDNNPMVVANAVAALAEIQESSVRPIFEITSHTLTKLLTALNECTEWGQVFILDSLSRYKATDARDAENIVERVTPRLQHANCAVVLSAVKIILLQMELITSTDVVRNLCKKMAPPLVTLLSAEPEIQYVALRNINLIVQKRPTILAHEIKVFFCKYNDPIYVKMEKLEIMIKLASDRNIDQVLLEFKEYATEVDVDFVRKAVRAIGRCAIKLDRAAERCISVLLELI…	71186.4	69777.1	50833	32675.4	56118	30232.2	51780.2	46451.8	52416.8	45220.3	110859	80210.9	114717	65021.3	92701.8	75918.4	74577.4	125906	154023	107606	164152	140314	61849.1	126595	123227
Bradi1g63010.1	0.00035353	0.000851763	0.999996	0.00315803	0.00851911	0.0020268	0.0020268	1.00745	0.31397	1.00745	0.35731	0.436351	0.31397	MVSLKVQKRLASSVLKCGKGKVWLDPNEVNEISMANSRQNIRKLVKDGFIIKKPQKIHSRSRARRAHEAKQKGRHSGYGKRRGTREARLPTKILWMRRMRVLRRLLRKYREAKKIDKHMYHDMYLKVKGNMFKNKRVLMESIHKSKAEKAREKTLSDQFEAKRAKSKASRERKIARREERLAQGPREHVAPAAAAPAQTAVAPKKAKK	9499.79	15092.1	23448.1	16105.2	16036.3	20723	20074	11875.1	11950.7	16155.7	6738.13	5692.61	4189.56	6299.41	5729.93	9072.32	5029.57	7754.42	6133.52	6997.46	4770.17	3767.16	5611.43	5990.91	5034.92
Bradi1g63310.1	4.70334e-05	0.000154	0.0568176	3.60496e-05	0.000222433	0.444624	3.60496e-05	0.871636	0.416315	0.759931	0.416315	0.513117	0.871636	MADEEQMEKKEEQTEITPFDPTKKKKKKKVVIQDPSDEVDKLAEKTESLAVTESGEPSFTGLKKKKKKHVELDPSLIEAGDGEDTLDDQIGEDEQGEGIVLGGATQYPWEGTDRDYTYEELLGRVFNILRENNPDLAGDRRRTVMRPPQVLREGTKKTVFVNFMDLCKTMHRQPEHVMTFLLAEMGTSGSLDGQQRLVIKGRFAPKNFEAILRRYINEYVICNGCKSPDTILSKENRLFFLRCEQCGSSRSVAPIKTGFVAQVGRRKAGA	5327.32	5046.3	4016.05	4319.25	4677.23	3054.67	3761.7	3454.3	3946.8	3554.37	2156.18	1681	1663.95	2287.66	1947.2	3486.77	2040.53	1893.06	2179.51	2399.97	3194.43	3798.17	5049.72	4265.03	4076.84
Bradi1g63320.1	5.85783e-05	0.000185934	0.803037	0.000811315	0.00464519	0.00192269	0.000811315	1.96296	0.824969	0.824969	1.96296	1.7988	1.88702	MGRSPRCVLLLLLAACAAALVPAAGAQGGGNSTAPAPAAAGSAPFVPRDDILLDCGATGNGNDTDGREWGGDAGSKYAPANLGSAIAGAQDPSVPQVPYLTARVSAAPFTYSFPLGPGRKFLRLHFYPANYSNRNAADAFFSVTVPAAKVTLLSNFSAYQTSTALNFAYLIREFSVNVTGQTLDLTFTPEKGHPNAYAFINGIEVVSSPDLFDLSTPELVMGDGNNQPYTMEAGTALQTMYRLNVGGQAISPSKDTGGYRSWDDDTPYIWGAGAGVSYQNDANVTITYPDNVPGYVAPTDVYATARSMGPDKDVNLAYNLTWIMQVDAGFFYLVRLHFCEIQSPITKPNQRVFDIYINNQTAMAGADVILWASPNGIGSPVYKDYVVNTMGSGTMDFWV…	97622.9	53365.5	62301.3	41354.7	63661.1	48185.3	66688	42253.4	52946.9	52518.4	114632	92514.6	135598	157112	124964	111301	102367	129556	114830	114514	126792	122971	123846	106909	120130
Bradi1g63550.1	0.0251196	0.0349344	0.111932	0.190075	0.626298	0.00719871	0.00719871	0.877802	0.601088	0.753405	0.786353	0.877802	0.601088	MRPRAVFLLAALVLSVCLRVSHAVTNSQDTSVLRALMDQWQDAPPTWGQSDDPCGDSPWEGVTCSNDRVIFIKVSTMGIKGVLAADIGQLSELQSLDLSFNHDLGGVLTPTIGNLKQLTTLILAGCSFHGNIPDELGSVPKLSYMALNSNRFSGNIPASLGNLSDLYWFDIADNLLTGPLPISSNGGMGLDKLTKTKHFHFNKNQLSGPIPDALFSPEMTLIHLLFDGNKFTGNIPDSLGFVSTLEVVRLDRNSLSGSAPANLNNLTKVNELNLANNQLTGPLPDLSGMAVLNYVDLSNNTFDPSPSPQWFWKLPQLSALIIQSGRLYGTVPMRLFSSPQLQQVILDGNAFNGTLDLGRSISSELSIVSFKDNDFSSVTLTSSYNGTLALAGNPVCDHL…	425299	295334	292633	245826	314773	313161	222566	196453	216426	237152	225779	198692	294229	271391	247523	263501	253077	317355	271301	276309	192455	171664	192150	200556	189206
Bradi1g63610.1	0.027725	0.0381644	0.0655374	0.0198495	0.96782	0.258907	0.0198495	1.32587	1.04872	1.26322	1.32587	1.04872	1.18295	MFGFGHHGHHGQNPPAHAPTTAGGHQPTFKIFCKADEGYCLSVRDGNVVLAPTNPRDEHQHWFKDMRFSTNIKDEENNPAFALVNKATGLAVKHSLGQSHPVKLVPFNPDFQDESVLWTESGDVGKGFRCIRMVNNIRLNFDALNGDKDHGGVHDGTTVVLWEWAKGDNQSWKILPWGDEAYAGGSANAPRGGPSEPTVRIFCKADEGFSATVRNGTVCLAPTNPRDDHQHWIKDMRHSNRIKDEEGYPAFALVNKVTGEAIKHSQGEGHPVKLVPYNPNYQDESVLWTESRDVGAGFRCIRMVNNIYLNFDALHGDKDHGGVRDGTSLVLWKWCEGDNQRWKILPWCKCRRP	3.09507e+06	3.50014e+06	4.62803e+06	4.30619e+06	3.88236e+06	4.66147e+06	5.39833e+06	4.78857e+06	4.76868e+06	4.90426e+06	4.86854e+06	5.70566e+06	4.3006e+06	5.71515e+06	5.14749e+06	3.7944e+06	4.82451e+06	3.66218e+06	4.005e+06	4.07152e+06	5.04462e+06	4.59535e+06	4.75624e+06	3.97437e+06	4.59264e+06
Bradi1g63990.1	0.0692394	0.0864852	0.97218	0.476351	0.0273128	0.413407	0.0273128	0.959808	0.733904	0.959808	0.880047	0.733904	0.870638	MAVPRACLDRRLFQVLCLVCAVCQIFFVGSATGQTAQLSVDASPQNAQMIPDNMFGIFFEEINHAGAGGLWAELVNNRGFEAGGPNTPSNIEPWLIIGDETNIIVATDRSSCFASNPIALKMEVLCQSSGTDVCPPGGVGIYNPGFWGMNIEKTKVYKLSMYIKSSDSVDLTVSLTSSDGLQNLAAHTITSDAEDFTEWTKVEFDLQASEGNTNSRLQLTTSKSGIVWFDQVSLMPSDTYMGHGYRKDLASMLANLKPKFLKFPGGNYVMGNYLLNAFRWSETVGPWEERPGHFNDVWGYWTDDGLGLFEFLQLAEDLGACPVWVVNDGASRNEQVPSATIASFVKDVVDGIEFARGDTGTSWGSVRAAMGHPEPFQLRYISMGNQECSMQYYKENYRK…	54483.9	45793.1	57144.3	59207.5	54157.2	54972	52191	46043.8	54715.3	51980.5	46968.3	38663.3	42247.7	62764.3	47660.9	39555.5	40592.5	42935	35901.9	39746.2	50911.1	45215.8	54456.9	38021.4	47151.3
Bradi1g64120.1	1.15475e-09	4.58163e-08	3.08642e-14	4.9128e-10	0.0160299	0.250114	3.08642e-14	11.3256	2.35711	11.3256	9.20461	3.47365	2.35711	MAPELSRKMTTAKAAAAAVKPATKAFVTFLAGDGDYWKGVVGLAKGLRKAGSAYPLVVAMLPDVPESHRRILASQGCILREIVPVYPPENQTQFAMAYYVINYSKLRIWEFVEYERMVYLDADIQVFDNVDELFDLPKGHFYAVMDCFCEKTWSHTPQYQIGYCQQCPDRVTWPAAEMGPPPALYFNAGMFVHEPSMATAKALLDTLRVSPTTPFAEQDFLNVFFREQYKPIPLVYNLVLAMLWRHPENVQLAKVKAVHYCAAGSKPWRFTGKEANMDREDIKVLVKKWWDIYNDESLDFKGLPADADELEAAAKKPIRAALAEAGTVKYITAPSAA	7851.66	10160.9	11930.2	11618.2	10390.2	124623	134267	94506	117307	117676	90435.5	119072	83882.6	89161.8	95638	37791.2	37297.9	42676.6	26602.3	36092	29490.2	21217.4	25303.7	21952.4	24490.9
Bradi1g65070.1	0.332527	0.356298	0.991634	0.608874	0.999996	0.693275	0.608874	1.36023	0.595515	0.88545	0.595515	1.01641	1.36023	MGQGTPGGMGKQGGLPGDRKPGDGNAGDKKDKKFEPPAAPSRVGRKQRRQKGPDVAARLPPVAPLSKCRLRLLKLDRVKDYLLMEEEFVVSQERLRPSEDKTEEDRSKVDDLRGTPMSVGSLEEIIDESHAIVSSSVGPEYYVSILSFVDKDQLEPGCSILMHNKVLSVVGILQDEVDPMVSVMKVEKAPLESYADIGGLDAQIQEIKEAVELPLTHPELYEDIGIRPPKGVILYGEPGTGKTLLAKAVANSTSATFLRVVGSELIQKYLGDGPKLVRELFRVADDLSPSIVFIDEIDAVGTKRYDAHSGGEREIQRTMLELLNQLDGFDSRGDVKVILATNRIESLDPALLRPGRIDRKIEFPLPDIKTRRRIFQIHTAKMTLAEDVNLEEFVMTKDE…	93.0879	622.616	331.734	478.61	381.512	450.296	498.584	402.36	0	337.81	262.796	225.952	104.541	315.496	227.196	393.392	248.827	329.633	579.238	387.772	833.438	432.876	443.586	365.877	518.944
Bradi1g65080.1	0.0992213	0.119083	0.21012	0.0353945	0.676861	0.679627	0.0353945	1.37665	1.13681	1.24946	1.37665	1.13736	1.13681	MAMVTADASPPPAIEASTKPPEAENNYSSYNGASTAGAGAGRSRARGGGGGVVDSVLARGRREEMLDKCPLALHAAAAAFAFVALVLVASNQHGDWMQFDRYQEYRYLLAIVALALLYSLAQALRHAHRMRGGADPVSAASGRLFDFVGDQVVAYLLMSALSAAIPITNRMRTAVINNFTDATAAAISMAFLAFVSLALSAIVSGYKLSKQTYM	28588.1	25292.1	55231.2	43130.1	38060.4	49073.6	51791.4	47302.8	42051.3	47554.8	52342.8	51864.9	50271.7	55104	52395.8	48452.9	45972.1	41685.7	37042.6	43288.3	46718.4	40868.3	42415.1	43068.1	43267.5
Bradi1g65150.1	0.00286137	0.00530948	0.517968	0.00460755	0.00340915	0.0110558	0.00340915	0.859916	0.561115	0.859916	0.578268	0.561115	0.622948	MYTARKKIQKDKGVEPSEFEDSVAQAFFDLENNNQDLKSELKDLYINTAIQMDVVGNRKAVVIHVPYRLRKAFRKSHVKLVRELEKKFSGKDVVFIATRRIVRPPKKGSAVQRPRTRTLTAVHDGILEDVVYPAEIVGKRVRYRLDGSKIIKIFLDPKERNNTEYKLETFTAVYRRLCGKEVVFEYPVTETA	59556.6	98157	109150	99317.5	91545.2	56700.1	80684.5	78638.7	98861.7	78721.2	51631.3	56633	52525	50961.6	52937.7	46758.3	45366	51459.6	61885.8	51367.4	45205.2	71670.5	51636.2	59599.9	57027.9
Bradi1g65210.1	0.0697293	0.086936	0.915132	0.106345	0.110221	0.0664566	0.0664566	0.833037	0.330567	0.833037	0.396719	0.401995	0.330567	MPNLECRMYEPRFPEVDAAVMIQVKHIADMGAYVSLLEYNNVEGMILFSELSRRRIRSISSLIKVGRQEPAIVLRVDRDKGYIDLSKRRVSEEEARSCEDKYNKSKLVHSIMRHVAETLEIDLEPIYQRIGWPLYRKYGHAFEAFKLIVADPDAILDVLTYEEKETGPDGQEVINVVPAVTPEVKETLVQNIRRRMTPQPLKIRADVEMKCFQFDGVLHIKQAMRKAEAAGNNNCPVKIKLVAPPLYVLTTQTLDKDQGISVLTDAVKACMTEIEKHKGKLVVKEAPRAVSERESKLLDAQFETLVEQNAEVAGDDDSEEEDEGMGDIDVSNSGVHAE	2606.34	43247.7	43011.3	45116.4	33495.5	19132.8	26764.2	35507	30207.8	27903	17269.3	19182.7	16535.1	166.032	13288.3	11474.2	5535.26	18875.1	17975.5	13465	13354.8	28593.8	712.969	1628.33	11072.5
Bradi1g65810.1	0.000176823	0.0004668	0.0593252	0.000292314	0.0016011	9.51924e-05	9.51924e-05	0.784298	0.511308	0.784298	0.566739	0.636935	0.511308	MDGAPVAEFRPTMTHGGRFLLYNIFGNQFEITAKYQPPIMPIGRGAYGIVCSVMNFETREMVAIKKIANAFDNNMDAKRTLREIKLLRHLDHENIVGLRDVIPPAIPQSFNDVYIATELMDTDLHHIIRSNQELSEEHCQYFLYQLLRGLKYIHSANVIHRDLKPSNLLLNANCDLKICDFGLARPSSESDMMTEYVVTRWYRAPELLLNSTDYSAAIDVWSVGCIFMELINRAPLFPGRDHMHQMRLITEVIGTPTDDDLGFIRNEDARRYMRHLPQFPRRPFPAQFPRVQPAALDLIERMLAFNPLQRITVEEALEHPYLERLHDIADEPICTDPFSFDFEQHPLTEDQMKQLIFNEALELNPNFRY	24498.8	26426.7	26242.4	19386.9	24138.7	20563.7	15972.3	24019.6	15172.2	18931.9	13564.5	13477.3	15312.1	12367.6	13680.3	18837.8	12567.4	15457.4	14636.6	15374.8	12445.7	10026.3	12916.6	13980.6	12342.3
Bradi1g65820.2	6.17578e-06	2.9543e-05	0.0400447	0.00018632	0.0347247	0.0898468	0.00018632	1.21907	0.565943	1.21907	0.565943	0.775425	0.813987	MAKTYPTVSAEYQEAVEKARRKLRALIAEKSCAPLMLRLAWHSAGTFDVSSKTGGPFGTMKKPAEQAHAANAGLDIAVRMLEPIKEEIPTISYADLYQLAGVVAVEVSGGPEIPFHPGREDKPQPPPEGRLPDATKGSDHLRQVFGKQMGLSDQDIVALSGGHTLGRCHKERSGFEGPWTREPLKFDNTYFTELLSGDKEGLLQLPSDKTLLSDPVFRPLVEKYAADEKAFFEDYKEAHLRLSELGYAEA	254209	295323	264731	178353	248154	283369	292805	312261	321633	302517	129403	126894	147102	158365	140441	217222	172548	198837	181092	192425	200229	179595	213744	214408	201994
Bradi1g65950.1	0.076177	0.0943643	0.0550956	0.0887181	0.0916364	0.0546916	0.0546916	0.430216	0.364634	0.364634	0.425678	0.430216	0.364685	MPSSIATHASLLLKAAAAAAAASPAHHLHPKRFFSPRAARIPSPPAPVASRRSPPAASCRLFRWPPAARGLCSSPHSGSAAGGAEGMGSDGAERRRRVAAVNGVSKEGAPQPVPVPPRLLTLPTVLTIGRVAAVPFLISTFYMDGPWAATATTGIFLAAAITDWLDGYIARKMQLGTPFGAFLDPVADKLMVAATLVLLCTKPLETSLLSDGPWLMTVPSIAIIGREITMSAVREWAASQNSQVLEAVAVNNLGKWKTATQMTALTLLLASRDPRYLHFLVTTLLFFICMLMRFIFCLQSTCTRCSSYSWCRIALCIRWTCHMVPSGVHQKDMADTSKIVLAHSVIGETGFHSRSCNFFGRLLS	12796.2	21598	5616.95	6175.7	11546.7	7128.35	2528.47	4252.63	2931.84	4210.32	5040.85	2786.08	7346.63	4487.18	4915.18	1956.38	9627.04	3731.59	4555.28	4967.57	5415.04	4131.95	3387.06	3909.61	4210.92
Bradi1g66030.1	0.00311522	0.00570208	0.9834	0.0137826	0.00470342	0.0428716	0.00470342	0.961225	0.612989	0.961225	0.668565	0.612989	0.725322	MNSLAFLCRPSPLTPSASPSISLSVPQSSCIKLPRSRPAAHRHRTAAAARISSRTVAMATAAAPPVIFPKENLPPSLTSTSEPPPLFDGTTRLYVAYHCPYAQRAWITRNCKGLQDKIKIVAIDLADRPVWYKEKVYPENKVPSLEHDNQVKGESLDLVKYIDSNFEGPALLPEDSAKKQSAEELLAYTDEFNKALYSSILSKGDVSEETVAALDKIEAALGKFTDGPFLLGQFSSVDIAYLPFIERFQIFYSGIKNYDITKGRPNFQKYIEEANKIDAYTQTKLEPQFLLDQTKKRLGIE	750391	773742	709919	555464	697379	860562	704536	587899	528356	670338	422916	458247	438414	545396	466243	526164	436938	375612	371230	427486	421944	454147	537929	609277	505824
Bradi1g66290.1	0.0194727	0.0279751	0.131197	0.821381	0.943326	0.369776	0.131197	1.22696	0.678809	0.678809	1.12104	1.08248	1.22696	MVPSGLFGWASPHVQPLTPVSEVSEPPESPSPYGDGPAGDAGVGLREGEGAGEEDVEEDDVEPPPAAVSFWRLFEFADGLDWALMAAGALAAAAHGAALVVYLHYFGRALNLLDSERIDSALHGRSQDLLNRFMEHALYIIYIAAGVFVAGWIEVSCWILTGERQTAVIRSKYVQVLLNQDMSFFDTYGNNGDIVSQVLSDVLLIQSAISEKVGNYIHNMATFIGGLIVGLINCWQIALLTLATGPLIVAAGGISNIFLHRLAENIQDAYAEAASIAEQATSYIRTLYAFTNETLAKYSYATSLQATLRYGILISLVQGIGLGFTYGLAICSCALQLWVGRHLIARGKADGGEVVVALFAVILSGLGLNQAATNFYSFEQGRIAAYRLYEMISRSTSSS…	129420	64079.7	76701.9	60889.3	82772.8	47143.4	58304.9	54737.7	64561.7	56186.9	113283	73105.7	93838.8	90938.1	92791.5	90449.3	89593.1	92008.4	86348.2	89599.7	100887	96905.9	116495	91949.2	101559
Bradi1g66440.1	1.33949e-05	5.45914e-05	0.00233089	6.65133e-07	0.0130161	3.72808e-05	6.65133e-07	0.765949	0.457719	0.702702	0.457719	0.765949	0.57047	MAQKEANGNGATTRPPPTPSPLRFSKFFQANMRILVTGGAGFIGSHLVDKLMENEKNEVIVADNFFTGSKDNLKKWIGHPRFELIRHDVTEPLLLEVDQIYHLACPASPIFYKHNPVKTIKTNVIGTLNMLGLAKRVGARILLTSTSEVYGDPLEHPQTEAYWGNVNPIGVRSCYDEGKRVAETLMFDYHRQHGIEIRIARIFNTYGPRMNIDDGRVVSNFIAQAIRGEALTVQKPGTQTRSFCYVADMVNGLMKLMNGDNTGPINIGNPGEFTMLELAENVKELINPEVTVTMTENTPDDPRQRKPDITKAKEVLDWEPKVVLRDGLVLMEDDFRERLAVPKKSKA	208176	299812	308733	309086	281452	162339	213251	208941	206576	197777	117042	141362	114768	142132	128826	244534	194311	221446	202020	215578	154728	168429	159465	159617	160560
Bradi1g66590.1	0.000318819	0.000780558	0.00635248	5.12006e-05	0.0018346	0.00155266	5.12006e-05	2.33883	1.82835	1.82835	2.33883	1.95257	1.97728	MAGKGDGPAIGIDLGTTYSCVGVWQHDRVEIIANDQGNRTTPSYVAFTDTERLIGDAAKNQVAMNPINTVFDAKRLIGRRFSDASVQSDAKLWPFKVIPGPGDKPMIGVQYRGEDKQFSAEEISSMVLNKMKETAEAYLGTTIKNAVVTVPAYFNDSQRQATKDAGVISGLNVMRIINEPTAAAIAYGLDKKSTSVGEKNVLIFDLGGGTFDVSLLTIEEGIFEVKATAGDTHLGGEDFDNRMVNHFVQEFKRKNKKDISGNPRALRRLRTACERAKRTLSSTAQTTIEIDSLFEGIDFYTTITRARFEELNMDLFRKCMEPVEKCLRDAKMDKSTVHDVVLVGGSTRIPRVQQLLQDFFNGKELCKSINPDEAVAYGAAVQAAILTGEGNEKVQDLLL…	918547	791876	856673	975175	885568	2.00093e+06	1.75501e+06	1.36971e+06	1.35085e+06	1.61913e+06	2.00504e+06	2.32296e+06	1.98235e+06	1.97441e+06	2.07119e+06	2.39449e+06	1.75302e+06	1.34763e+06	1.42139e+06	1.72913e+06	1.61887e+06	1.7526e+06	1.75034e+06	1.88226e+06	1.75102e+06
Bradi1g66620.1	0.0269354	0.0371533	0.636276	0.679469	0.351637	0.099813	0.099813	1.36625	0.825745	0.825745	1.16416	1.24761	1.36625	MSSSTIRKALGAVKDQTSIGLAKVTSNIAPELDVLIVKTTSHDDEPAEERHIREILHLTSGSRAHVAAAVAGCSRRLSRTRDYVVALKSLMLVHRLLTDGDSFFHRELLHATRRGTRLLNLSDFRDEAHSGSWDHSAFVRTYALYLDQRLEFLLHERKQGANPNAAPSLNGPSPRDRWGSPDPYGRRSPSYTSPGNGSGSGYGGYDDHRERNGGNSDDKRPPTPVRDMKPERVLGRMHHLQQLLDRFLACRPTGGAKQSRMVLVALYQMVRESFQLYADICEVLAVLLDRFFDMEYADCVKAFEAYASAAKQIDELCSFYAWCKDTGVARSSEYPEVQRVTDKLLETLEEFMRDRAKRPKSPPREPEPEPVKEEEPEPDMNSIKALPAPEDFKEPEPVK…	278120	175932	228008	136423	204620	171656	180874	177301	146027	168964	231097	211720	271993	238031	238210	214371	251019	249134	306620	255286	248507	206278	340469	322993	279562
Bradi1g66687.1	0.00238163	0.00451238	0.104314	0.00486231	0.000766526	0.168088	0.000766526	0.769178	0.46087	0.73862	0.56099	0.46087	0.769178	MGSKDQDLAASSGGGGGFFSSIAAGVRSWGTAVHKSVNGMVGYEGLEVINPDGGTEDAEAEAMRGRWKQEDRDSYWKMMSKYIGSDVTSLVTLPVIIFEPMTMLQKMAELMEYCELLDKADECEDPYMRLVYASIWAVSVYPAYQRMWKPFNPILGETYEMVNHQGITFIAEQVSHHPPMGVAHCENDHFTYDITSKLKTKFLGNSVEVYPVGRTRVTLKKSGVVLELIPPLTKVNNLIFGRTWVDSPGEMIMNNLTTGDKVVLYFQPCGWFGAGRYEVDGYVYSAAEEPKMMVTGKWNKFMSYQPCDQEGEPLPGTELKEIWRVAPTPPSDKYQYTYFAHKINSFDTAPKKLLPSDSRLRPDRYALEKGDMSKSGAHKSRLEEQQRAEKRTRDTKGEQ…	4064.42	3884.23	3431.13	2559.45	3484.81	2258.57	1950.56	3382.6	2704.07	2573.95	1574.73	2115.72	1378.49	2750.82	1954.94	2031.46	1096.51	1540.02	1756.19	1606.05	2126.67	3028.65	2708.6	2857.84	2680.44
Bradi1g66800.1	0.000603102	0.00135147	0.10227	0.0034403	0.00152706	0.000182474	0.000182474	0.785326	0.503427	0.785326	0.626634	0.589958	0.503427	MAGDRLSWARLLKWSLSYIDGARPSRAISEEERMWLAEAVERHMAADVVSRMREIALLMSTPPSVLEAQGITPDDIEGLLAELQVHVESIDIANDLHSVGGLVPVIKYLRNSNARIRAKAADVVTTVVQNNPTSQQLVMEASGFEPLLSNFISDPDLTARIKALGALSSLIRNNKPGVAAFRLANGYAGLRDALSSESARFQRKALNLTHYLLSESHSDCSVFAQLGFPRVMMTLVSSNDSGVREAALGGLLELARDTTLGNRSLLADQDRLRRLLWRRIQSIRMMAPEDLDAAREERQLVDSLWIACYHEPSTLQQEGLLVLPGEESFEQPPDVAGRFFEPLRRQSVGRAPPDERSEPVSGTVGGMMMLLGPAPGNSLSN	40186.2	59891.2	67009.6	54529	55404	37315.9	45440	37974.3	53310.6	43510.2	32150.2	40028.3	30248.7	36444.7	34718	34867.4	24783.4	31674.2	39419.1	32686	27068.4	22831.2	31941.6	29726.1	27891.8
Bradi1g67020.1	0.0419798	0.0553575	0.0407235	0.317736	0.0847244	0.996702	0.0407235	1.53502	1.04856	1.53502	1.31357	1.46148	1.04856	MAAATTTTSRPLLLSRQQAAAAAGSLQCRLPRRSGLFAGQTSGAASMGPGVRCTAVVDTASAPAAAEPAKRKPSSYEIITLTTWLLKQEQAGTIDGEMTIVLSSISTACKQIASLVQRAPISNLTGVQGATNVQGEDQKKLDVVSNEVFSNCLRSSGRTGVIASEEEDVPVAVEESYSGNYIVVFDPLDGSSNIDAAVSTGSIFGIYSPADECLADIGENPTLDQVTEMCVVNVCQPGSNLLAAGYCMYSSSVIFVLTIGTGVYVFTLDPMYGEFVLTQEKVQIPKSGKIYSFNEGNYALWDDKLKSYMDSLKDPGTSGKPYSARYIGSLVGDFHRTMLYGGIYGYPRDQKSKNGKLRLLYECAPMSFIAEQAGGKGSDGHQRVLDIIPTEVHQRVPLY…	40702.2	37108.1	47563.3	61847.4	46805.3	93459.5	78964.3	57465.5	57498.8	71847	67538.6	70220.8	48358.8	59809.8	61482	80188.1	77265.9	60028.9	56137.7	68405.1	50983.4	34017.2	57799.4	53513.1	49078.3
Bradi1g67120.1	0.00228085	0.00435201	0.0370923	0.0562946	0.00281018	0.00073688	0.00073688	0.527985	0.142548	0.489713	0.527985	0.260387	0.142548	MSRPSRSDAHLSPVDEATRVAEVREYYDDAAPKRHTKPSRSEHSAVYADALADDSHPELDKLQQLEAHTGKLVCEGGKAGEEFVETEYYRDLGCVGKQHHTTGTGFIKMDKPTGASFELSDDPDATERHASCKGNPATNEWIPSADTVYLASDKPSRSDS	6461.42	15466.7	9876.43	5108.17	9228.18	5015.17	2990.96	4197.68	5872.8	4519.15	3660.87	4917.44	4164.52	6746.54	4872.34	3037.83	3375.99	2190.8	1006.97	2402.9	801.863	212.931	2138.39	2108.67	1315.46
Bradi1g67270.1	0.00894023	0.0142106	0.741034	0.0249556	0.25754	0.38562	0.0249556	1.40225	0.874618	0.874618	1.40225	1.23458	1.19917	MALSASAASAGRGARAEKVRRIFERFDTNGDGGLDRGEMAALVVAVNPRVKFSDDQISAILDEVFRTYGEFILPGGRGLSLTGLLRTYDDGAGDVDRDFLALSLPTVDSDASSPEIAAGDSAVSSSPTPGAATAASLLDDHLKPLGIGGTPPSSSSRAAASAPAWATSPSHGIAFDSSWALLDDLEILVKRLRSKQLRKTPSIDTSGGANNFDSFSEAGWSREISGSADSGLAAAPWDETSRDYLTFVKELAVLRTRADASRSREEAFDNHMVIGRALSEHRLFRDALASFRRGCELQPTDVRPHFRAGNCLYALGRHAEAKEEYLLALEAAEAGSSQSADILPQIHVNLGIAMEAEGMVLGACEHYREAAILCPSHARALKLLGSALFGVGEYRAAEK…	657539	426215	487883	355460	481774	449512	488358	319011	428594	421369	678323	594745	667898	761299	675566	644976	618772	620304	495106	594789	676282	487379	633116	514136	577728
Bradi1g67517.1	0.000954602	0.00201789	0.0162968	0.00294966	0.000769215	0.000585155	0.000585155	0.662572	0.493091	0.662572	0.575188	0.506098	0.493091	MSKKKSKNLQMVLSDGNGAAAASVVTGSAIAASYNDQIRPLLDAVDRLRHLKVTQEGIQLPTIVVVGDQSSGKSSVLESLAGISLPRGQGICTRVPLVMRLQDDPSADSPVLQLEYSNGRAVATTEAKVADAINAATAEIAGSGKGISDAPITLVVRKRGVPDLTLVDLPGITRVPVQGQPDDIYDQIARIIKEYIAPKESIILNVLTATVDFPTCESIRMSQQVDRTGERTLAVVTKVDKAPEGLLEKVTMDDVNIGLGYVCVRNRIGEETYDQARVEEEKLFKYHPLLSKIDKDMVGIPVLAQRLMQIQATIIAKCLPDIVRQINDRLSRNSTELEQMPPDVTSVADAVKEFIRIVKQVCGSLEKILVRGEFDDFPDDGHFHGTARVAEMLNRYAKK…	21893	38521.7	41589.9	28905.3	32727.5	23731.1	21023.8	19315.8	22666.5	21684.3	20880.6	17085.9	19317.9	18013.4	18824.4	19540.3	15734.6	18095.3	12883.1	16563.3	13048.3	12760.5	17970.7	20771	16137.6
Bradi1g67840.1	0.00135884	0.0027565	0.00595701	0.0488974	0.00148578	0.000834018	0.000834018	0.485851	0.0868988	0.285089	0.485851	0.141686	0.0868988	MEMQFAAVLASLALGGALLVLFFGKWWQPLADADRRVKELDDAVEALLQLRAAVLKQLDGAPESEQTRAWLRRAQEAQDEVASIKARHDAGQLYVIRLLQYFLAAGAVAAGALAEKQLKIVRAIQEQGAALLEAALATPQAPPPLLLQPEELELPLPATTGATRARLNEALRFLGDCDAALGVWGAGGVGKTTLLKHVRGVCGRVAPFFDHVFLVAASRDCTVANLQREVVAVLGLREAPTEQAQAAGILSFLRDKSFLLLLDGVWERLDLERVGIPQPFGVVAGRVRKVIVASRSETVCADMGCRKKIKMERLNEDDAWNLFEGNVGEEAVRWDTQISTLARQVAAECKGLPLCLAIVGRAMSNKRTPEEWSNALDKLKNPQLSSGKSGPDESTHALV…	22358.1	16947.6	9494.76	5036.2	13459.2	2446.5	3668.24	3635.1	5598.42	3837.07	6984.84	4494.16	7300.75	7376.87	6539.15	1004.05	1821.33	2815.54	1986.98	1906.97	1683.1	493.025	1004.52	1497.69	1169.59
Bradi1g67960.1	0.000100445	0.000288298	0.00714229	0.00125354	4.57639e-05	3.52104e-05	3.52104e-05	0.565207	0.269117	0.565207	0.459978	0.288478	0.269117	MASGGGGCLPAMDLMRSEPMQLLQVIIPTESAHLAVSYLGDLGLIQFKDLNADKSPFQRTYAAQIKRCGEMARKLRFFKEQMSKAGIQISPVQLTETPLDFDDMEIKLGELEAELTEVNANDEKLQRTYNELLEYSTVLQKAGEFFYSAQRSAAAQQREMETSQSGDISLESPLLEQDMFTDASKQVKLGSLSGLVPKEKAMAFERILFRATRGNILLRQESVDEPVTDPQSGEKVSKNTFVIFYSGERAKAKILKICDAFRANRYPFPEDLGKQMHTVQEVSGKISELKATIDMGLAHRDSILKTIALEYEHWNHLAKKEKSIYHTLNMLSVDVTKKCLVGEGWSPVFATSQVQDALQRATLESKSQVGSIFQVLNTKESPPTYFQTNKFTSAFQEIV…	362072	490108	567413	265559	421288	264403	205708	190189	292159	238115	183182	165297	176751	249903	193783	191219	124027	90414.2	80469.8	121532	102480	96467.8	127294	127262	113376
Bradi1g68010.1	0.00353579	0.0063428	0.997707	0.0105728	0.654603	0.998929	0.0105728	1.90649	0.718883	0.939838	1.90649	0.718883	1.04944	MERSWFGRRKTKKRQGGEKEDRQKVVVDGTEIRELVGDREAFGMFAESKFRELDADGDGRLSVRELQPAVAGIGAALGLPAQGSDPNADHIYSEAMSEVTQGKQEGVSRAEFQEVLSDILLGMAAGLKRDPIVILRIDGEDLRDFVSSPRYEPAAAAIFSQAGSEDASSLRQRLLAAVRQLGVDHGMPPAADPWVLENVIEPALQRLSADQLEQPVASKDIFLEQLKKLLGDVVERLQERPVIVAHTENTFDGSGVRSLLANKFELDKLLDSVCKDVPVEHKKKASKECLRAALDKMADAASLPPHGSVTQVDAIVDEALKMANNAHDGKAVDEAEFKKLLTEVLGAVMLRLSGDPVFVSTSTVVHESLSSSSTLLSSPAVPSPPSE	15444.3	9290.58	13374.8	10810.2	12230	13797.1	15858.7	8496.81	7824.25	11494.2	18408.6	23127.5	22153.4	29576	23316.4	6772.23	4978.93	10563.1	12853.4	8791.93	12072.5	7659.45	22111	9495.61	12834.6
Bradi1g68210.1	0.00161807	0.00323374	0.80245	0.00105048	0.999862	0.0894427	0.00105048	1.80568	1.02006	1.15137	1.80568	1.02006	1.42412	MASASNTNQKSLYPEVAQSHPDHNAAFHSNPPAAGATGASLYPTVDPRELAEDLFPADAAEDAAPAPPTVEETLVAVPGTQLHLVDPDRSLDLGAGTLSIVRLRQGDHAVAVLARLTPDKSQQRRGLFRFLSGGGRSSEAQEPVQWPLARDVAAVKLDAAHYFFSLHVPHTDHPDDAEEAAEAEKDAADGESALSYGLTVAGKGQEKVLEELDTVLKEYTTFSVKQVDAAANEKSEVMDTRAVTEITPEEAVGDKKELMEEQSAAFWTTIAPNVDDYSSSVARLIAKGSGQLVRGIIWCGDITAGGLKCGEAVLKKSVGPSGKPAQVKPSSLRRMKRARRVTKMSNRVANSILSGVLKVSGFVTSTVLNSKPAQKFFKLMPGEVILASLDGFGKVWDAV…	60824.2	75521.7	81236.6	52191.1	67443.4	62986.1	83006.6	65306.3	99311.4	77652.6	141246	143584	104101	98192.4	121781	67165.7	52237.5	79649.1	76133.7	68796.5	78852.2	89371.6	109719	106249	96047.7
Bradi1g68290.1	0.275666	0.299898	0.991617	0.975703	0.199808	0.387364	0.199808	0.926872	0.565752	0.926872	0.902008	0.565752	0.661691	MVLESTMICIDNSEWMRNGDYAPSRFQAQADAVNLICGAKTQSNPENTVGVMTMAGKGVRVLVTPTSDLGKILACMHGLEVGAEANLAAAIQVAQLALKHRQNKRQQQRIIVFIGSPVKYDKKVLETIGKKLKKNNVALDVVDFGETDDEKPEKLEALISAVNSSDSSHIVHVPPGENALSDVLISTPIFTGEEGGSGFAASAAAAAATGATGYDFGVDPNVDPELALALRLSMEEERARQEAIAKKAAEESSGETKDHASSSNSDSVMAEAEPASNASADDKRDLPKEDEDAQLLQQALAMSMDEGASGAAAVADAAMAEAGADDDELALALQMSVEDTQMSGQSDMTKVFEDRSFVTSILNSLPGVDPNDPSVKDLLASLNGQGEQEEKKDNSDKPN…	10049.1	10859.5	8565.94	12909.6	10596	13096.7	8962.51	4894.67	12330.8	9821.16	11784.3	3905.03	11521.7	11019.8	9557.7	6457.78	9145.02	3698.48	4677.63	5994.73	4799.94	2954.07	12705.6	7585.6	7011.3
Bradi1g68460.2	0.00011815	0.000327455	0.0620208	0.000662451	0.000145014	0.000145996	0.000145014	1.85521	1.38514	1.38514	1.73543	1.85521	1.83762	MDRRSWPWKKKSSDKSSNADASHNSNQPEQDEKVPKFVQISPETYAHLTDSEEQVKVLDEKVNVLNEKLSASQSEITTKDALVKQHAKVAEEAVSGWEKAEAEASALKVQLETVTLSKLAAEERAAHLDGALKECMKQVRTVKEEGEQKLHDVVFAKTKQWEKIKAELEEKLLEFEHELIRAGAENDALSRSLQERADLLMKIDEEKAQAEAEIEVLKSTIQSGEREINSLKYEIHVVSKELEIRNEEKNMSVRSADVATKQHLEDVKKISKLEAECQRLRGLVRKKLPGPAALAQMKMEVESLGVGRDYGDNRLRRSPAKNSSFHRPMSPMSPVPDFAFDNLQHMQKENEFLTARLLTTEEETKMLQEALTKRNSELQTSRSMYAKIAGKLRSLEVQM…	16169.3	9994.25	15603.9	15980.1	14436.9	22610.7	18467.2	18619.1	20291.7	19997.2	23818.4	22860.3	26097.2	27441	25054.2	32517.5	29869.4	21871.7	22875.2	26783.5	27396.2	25240.3	26113.8	27367.4	26529.4
Bradi1g68520.1	0.0169742	0.0248894	0.240746	0.0621924	0.00364753	0.196915	0.00364753	0.761951	0.478413	0.761951	0.662253	0.478413	0.746039	MALQWMILACVVAAEAAVAALLTLPAPRAVRGQIVGLTSMFLQPFAGVLPFAGFQLLDIYWKKEHRLMCTTEVCTAEERVHFEKAIFKAQRNVILCVSVFLLYWSIYRICKINKDIKALEEIEKRIKEE	17658.1	14978.7	11486.3	8696.35	13204.8	9070.54	7570.45	12631.2	10973.6	10061.4	8781.89	9694.72	8626.91	7876.26	8744.95	5706.53	5835.41	5751.4	7976.15	6317.37	8193.03	6986.65	12213.8	12011.9	9851.33
Bradi1g68540.1	0.854714	0.860455	0.994041	0.999787	0.998403	0.865613	0.865613	1.1602	0.600566	1.1602	1.06807	0.886347	0.600566	MATPIPREWVGLQQFPAATQTKLHELLGKLKEENVSTLTILVMGKGGVGKSSTVNSIVGERVANVSAFQSEGLRPMMCSRTRAGFTLNVIDTPGLIEGGYINEQAVEIIKRFLLDKTIDVLLYVDRLDAYRMDTLDEQVIRAITNSFGKDIWRRTLVVLTHAQLSPPDGLEYSDFFTRRSESLLRYIRSGAGIGKRELADFPLPLALVENSGRCKTNENGEKILPDGTPWVPNLMKEITVVVSNGSKPIHVDQKLIDGPNPNNRWKMYIPLILAVQYFFVVKGIRRAIHSDISNGKLDDWEQRYRDLVGSGNPVDQRVSSSRNPKA	5009.99	1614.29	446.924	2923.75	2498.74	5256.5	3371.47	2099.65	868.502	2899.03	2429.72	3067.6	3462.13	1715.81	2668.82	2810.46	5640.66	407.881	0	2214.75	3309.34	2693.29	0	0	1500.66
Bradi1g68850.1	2.07518e-07	2.27595e-06	1	1	0.126984	2.50351e-08	2.50351e-08	3927.4	0	0	3.47345	908.953	3927.4	MASLKEKLNLEEPLLEDLAVHRGDRIVDIEGTPTPGTKHRTGSWKACTFILVTECFEELAYYGIQFNLVTFLKTVLQESNVSAARNYTNWQGTCYIAPLVGAVVADSYLGRYLTTLAFFAVYLAGMAAMSISASFPACTGLDCRQEGSSSSQSAVFFLGLYMMAIGAGGIKPCVSSFGADQFDDSVPSERLKKSSFFNWFFFSIYIGSFASGTVVVWMQDNLGWVVGLWIPTLFIALAMASFLLGSGSYRVQKPLGSPLVRVSQVLVAAVRKRNASLPKDASLLYELPEGASMADGTKKLQHTPVLSALDKAAVIASTEELCSSDPWRLCTVTQVEELKAVIGMLPIWATGIVYFAVLAQFSSTFLEQGRMMNTTVTIPGRSFSIPPASLASFDAVSVI…	54.8	0	0	0	13.7	0	0	0	0	0	0	0	190.345	0	47.5863	14612.6	8116.83	9988.99	17092.3	12452.7	32417.3	51489.6	74202.7	57112.3	53805.5
Bradi1g69510.1	0.201716	0.224703	0.997158	0.159133	0.756023	0.999419	0.159133	1.43747	0.965565	1.05178	1.43747	1.19624	0.965565	MAWAEDEAIGPDVASAGLHVSERIGRDAAAQPDLEEALEASRYASHPYSSHPKEWPPLVEVAETRQLPPMLIERYNAAAGEGTALCGIFSEIHRAWATVDNSFYVWRFDKWDGQCQEYHADEQAICAVGLARAKPGIFVEAIQYILVLATPVELILVGVCCSASADGADPYAELSLQPLPEYMISTDGVTMTCITCTDKGQIFLSGRDGHIYELQYTTGSGWRKRCRKVCLTTGLGSLLSRWVLPNAFKFSAVDPIVDMVIDEERNTIYARTEGMKLQLFDLGANGDGPLKKITEEKNLVDPRDAPYGGRRPNAPRAVRSPKPSIICISPLSAMESKWLHAVAVLSDGKRLFISTSGGSSSSVGLNNGLQRPSCLKIVATRPSPPLGVGGGLTFGAVSA…	20269.4	14473.7	18323.3	17222.6	17572.3	24568.6	16721	16393.2	16245.9	18482.2	25991	25618.4	22280.3	27148.9	25259.7	35053.5	19143.1	14347.3	15539	21020.7	17922.7	11828.6	21708.4	16409	16967.2
Bradi1g69550.1	0.167117	0.189171	0.84061	0.725559	0.68744	0.692375	0.68744	1.09394	0.900504	1.0759	1.09394	0.900504	0.901225	MAAMPGLARVALAVLVLFSALPASLSDDLNSDAQALQGLRSAVGRSALPSWNNSTPTCQWDGVSCESGRVVELRLPGAGLIGTLPSGVLGNLTALRTLSLRYNALTGPIPDDLSRATELRALYLQHNSFSGEVPASLFTLKNLVRLDIAENKFSGEISPDFNKLNRLGSLLLESNDFSGEIPKLDLPTLEQFNVSYNKLNGSIPTKLRKMPKDSFLGTTLCGGPLGLCPGETAPTPAGAPGSQPDAGGVADVAGSKKKKLSGGAIAGIAIGCVFGVLLLLALLFFLCRKRSSKARSTAAVEKGHDLGMAQLDAEPKGQNGSAAGNGVHAGAAAGAVPAAASAAAVAAAAAAAKSGGSTGGTKKLIYFGPMAVAPPFDLEDLLRASAEVLGKGAFGTAYK…	900721	835246	1.01853e+06	1.20386e+06	989590	896200	1.05605e+06	1.18446e+06	1.12211e+06	1.06471e+06	1.03101e+06	1.02877e+06	1.04454e+06	1.22589e+06	1.08255e+06	846581	814118	983477	920344	891130	1.016e+06	961843	965521	624014	891843
Bradi1g69600.1	0.170699	0.192697	0.405799	0.276305	0.596482	0.057363	0.057363	0.790678	0.529561	0.735803	0.689203	0.790678	0.529561	MVLLLVFLLFSSSLQVSTTAIHTLALGQSLPWNETMVSKGGSFELGLFSPGNSSKHYIGIWYKKISKRTVVWVANRENPVVNPSTSRFMLSVHGELALLTTPSDASLWSSSRPSSSPPPRATFATLQDDGNLVVWSSSRNATSTTTSSQVTWQSFDHPTDTWLPGARLGYDRGAGGGVHSFLTSWTDSENPAPGAFTMEIDARGQPKFDLFAAAARGSGAKQQYWTTGLWDGEIFANVPEMRSGYFAGIPYAPNASVNFFTYRDRIPAGSSAFRGVGIGNFMLDVNGQMRRRQWSEQAGEWILFCSEPHDACDVYGSCGPFGLCSNTTSPACRCPSGFAPRSEREWSLRNTASGCARRSLLECPKDGFLKLPYAVQLPGGSAEAAGVRNERDCERSCLK…	25427.8	15851.1	11410.2	9714.5	15600.9	15499.8	13536.5	9186.51	7694.03	11479.2	11439.5	9620.39	10924.2	11024.7	10752.2	15515.7	8914.5	15190.5	9720.56	12335.3	9441.95	7665.68	7884.03	8054.93	8261.65
Bradi1g69610.1	0.00840851	0.0135359	0.819931	0.987813	0.0102445	0.0323869	0.0102445	0.935595	0.375144	0.852768	0.935595	0.375144	0.478171	MKKLSFFLSLLAAVAVVHGEDGAYIGVNIGTAMSSVPAPTQITTLLRSQNIRHIRLYDADPAMLSALANTGIRVIVSVPNEQLLGIGNSNATAAKWVARNVAAHYPSVNITAIAVGSEVLSTLPNAAPLIMPAVRFLQNALVAASLDRFIKVSTPHSSSIILDSFPPSQAFFNRSLDPVLVPLLKFLQSTGAPLMLNVYPYYDYMRSNGVIPLDYALFRTLPPNKEAVDANTLLHYTNVFDAVVDAAYFAMAYLNVTNVPVMVTETGWPHKGDASSEPDANADNADTYNSNLIRHVMNVTGTPKHPGVAVPTYIYELYDEDTRPGTTSEKYWGLFDMNGSPAYALHLTGSGQLLANDTTNNTFCVARDGADEKMLQAALDWACGPGKVDCSVLTQGHAC…	4771.54	3522.56	4709.44	8779.47	5445.75	2175.97	5887.39	5005.69	5506.8	4643.96	4913.1	5425.16	4980.81	5061.01	5095.02	1515.6	1432.59	1968.87	3254.7	2042.94	3195.74	2577.53	1734.65	2908.07	2604
Bradi1g69670.1	0.000826639	0.00179571	0.10045	0.0194824	0.619593	0.99937	0.0194824	1.35692	0.738695	0.738695	1.35692	0.872701	0.981345	MREIISIHIGQAGIQVGNSCWELYCLEHGIQPDGLMPSDTSVGVAKDAFNTFFSETGSGKHVPRALFVDLEPTVIDEVKTGLYRQLFHPEQLISHNEDAANNFARGHYTVGREVVDLCLDRIRKLADNCTGLQGFLVFNAVGGGTGSGLGSLLLERLSVDYGRKSKLGFTIYPSPQISTAVVEPYNSVLSTHSLIEHTDVVVLLDNEAIYDICKRSLDIERPTYTNLNRLISQVISSLTTSLRFDGAINVDITEFQTNLVPYPRIHFMLSSYAPIISVEKAFHEQHSVPEITNAVFEPSSVMAKCDPRHGKYMACCLMYRGDVVPKDVNSAVHSIKTKRAVQFVDWCPTGFKCGINYQPPTVVPGGDLAKVQRAVCMISNNTAVAEVFSRIDRKFDLMY…	70810.7	57663.7	65493.7	76536.8	67626.2	37326.4	42591.7	63747.7	56154.8	49955.1	88236.7	104073	90608.2	84133.8	91763	53704.3	45641.8	61811.7	74912.1	59017.5	52283.6	75806.1	74523	62845.6	66364.6
Bradi1g69710.1	0.0203543	0.0291795	0.999254	0.783273	0.991862	0.0359263	0.0359263	1.88102	0.72799	1.05333	0.72799	1.09932	1.88102	MAGGGFSVSSSAGTEFEAKITPIVIISCIMAATGGLMFGYDVGISGGVTSMDDFLREFFPAVLRRKQQDKESNYCKYDDQGLQLFTSSLYLAGLTATFFASYTTRRLGRRLTMLIAGVFFIVGVIFNGAAQNLAMLIVGRILLGCGVGFANQAVPLFLSEIAPTRIRGGLNILFQLNVTIGILFANLVNSGTSKIHPWGWRLSLSLAGIPAGMLTLGALFVTDTPNSLIERGRLDEGKAVLKRIRGTDNVEPEFNEIVEASRIAQEVKHPFRNLLQRRNRPQLVIAVLLQIFQQFTGINAIMFYAPVLFNTLGFKSDASLYSAVITGAVNVVSTLVSVYCVDRVGRRVLLLEAGVQMFLSQVVIAVVLGIKVTDRSDNLGHGWAVLVVVMVCTYVASFA…	62545.6	27427.8	22337.8	27639.8	34987.8	55209.3	38718.8	38308.3	15178.9	36853.8	24364.9	20446.3	23151	33920.8	25470.7	61200.9	36577.2	35251.6	20821.6	38462.8	78645.4	45477.3	70412.6	68714.8	65812.5
Bradi1g70180.1	0.0717135	0.0891627	0.676335	0.0650983	0.127057	0.0518423	0.0518423	0.748347	0.357397	0.748347	0.385706	0.472746	0.357397	MAFRRILSAAVRRRSAAAAAAAGNAREASTAVAAGPGVIGPDAPAVRAPLMPYDRISEAVNARLRRLEHPDPRFLRYASPVPAHVDHTAILAAPETRVTTLPNGLRVATESSLAARTATVGVWIDAGSRYEKDSQAGVAHFVEHMLFKGTGMRTAGQLEQEIEDIGGHLNAYTSREQTTYYAKVLDKDVPRALEVLADILQNSNLAEERIERERDVILREMEEVEGQSEEVIFDHLHATAFQYTSLGRPILGSADNVRSITQEDLKAYIKTHYTAPRMVITAAGAVKHEDIVEQATKLFDKLSTDPTTTSMLVDKEPASFTGSEVRIIDDDMPLAQFAVAFNGASWADPDSIALMVMQTMLGSWNKSAGGGKHMGSELVQRVAINDIAESIMAFNTNYK…	4311.32	9944.88	6009.94	2914.58	5795.18	3102	6698.27	2741.94	4805.01	4336.81	1444.78	1780.87	1911.77	3803.53	2235.24	3484.11	2575.39	1432.52	3466.58	2739.65	26.875	613.15	4295.09	3349.6	2071.18
Bradi1g70250.1	0.444655	0.467528	0.258051	0.604855	0.450245	0.920473	0.258051	1.63248	1.22134	1.63248	1.41104	1.49713	1.22134	MQRLVLAGNLIEIIPADIGYLRNLKILTLDRNRITILPEELGSLSNLQQLTISQNSLLCLPKSVGDLRNMLLLNVSDNKLNAFPESIGGCNSLEELQANGNSIEDLPSSICNLVCLKSISLNRNKIRQLPQGLLKDCKALQNISLHDNPISMDQFQQMDGFEEFEARRRKKFDKQIDSNVMMSSTALDEGVDLR	32786.4	44874.4	56372.9	82497.7	54132.8	80765	104255	102016	66447.2	88370.7	108345	75059.1	90334.4	31796.5	76383.7	96570.3	55416.8	89070.4	83117.4	81043.7	90983.3	106018	39834.7	27622.7	66114.7
Bradi1g70700.1	8.1346e-11	1.07617e-08	6.91669e-14	0	5.98088e-09	6.80698e-10	0	11.0099	7.39183	8.9416	11.0099	9.12894	7.39183	MGILDELSEMCLCPGIRPRRRLKKRKQMTTVEMKVRIDCEGCERKIRKAVESMEGVTGVEVVPKQNKVAVTGYVDPAKVMRRVAYKTGKRVEPWPYVPYDVVAHPYAPGAYDKKAPPGYVRNVVSDPNAAPLARASSTEVKYTSAFSDENPNAACTIM	70671.9	65269.2	68659.6	78935.9	70884.1	659561	660037	588730	626942	633818	759213	849490	674165	838850	780430	650317	751538	605372	581163	647097	555825	502679	512416	524933	523963
Bradi1g70760.1	0.000259484	0.000648229	0.986586	0.672838	0.0055441	0.0101219	0.0055441	1.16773	0.395869	1.05885	1.16773	0.395869	0.44333	MQTETQFSSAAMKRTSDWIRSQEFPSDITIQVGDGTFNLHKLPLASKCGYIRKLVSGANGSRVTHLEIPGLPGGAKAFELVIKFCYGANFEITADNVAMLRCAAEHLEMTEECKPGNLIGRAEAYLEEVALASLAGSVAALRASEELLPASERVQLVGRCVDAIALIACDGGDGYESGVVSVPAKAAVDDWWADELTALRIDTFQRVMIAMKARGFKGIALGTLIMLYAQKSLRRLDVNGRERKKMDPRQEHEKRVVLETIVSLLPREKNTMSVSFLSMLLRAAIYLDTSLACRLDLEARMAAQLGQAVLDDLLIPSSASPDADGGAAAFDVDAVQRILVGYLEHHEGGGEATAAMAMAPRGLDYNTDDDFVSVASPPPTDVALVGRLMESYLAEISSD…	151485	147783	247647	352723	224909	186231	274981	248101	243269	238146	297388	282255	239696	231195	262633	95120.4	90351.5	81619.8	89046.7	89034.6	84815.5	132793	106825	74403.4	99709.1
Bradi1g70850.1	6.668e-08	9.36993e-07	1	1	1.56809e-07	1.56998e-06	1.56809e-07	3252.13	0.0176681	0.442879	0.0176681	3252.13	2820	MGVHGLWGLLAPVGRRVSVETLAGKRLAVDASIWMVQFMRAMRDDKGDMVRDAHILGFLRRICKLLFLRARPVFVFDGATPALKRRTLASRRRHRDAAQAKVRKTAEKLLISHLKASRLEELAAKIKSDRAKHDAKGKQIESNTGEETEKTYGDPNRNDDGGNSRGTIAPINQEKLDELLAASLAAEDEADLTDKGGHNSASVPLQQGTGIDEDENDDDEEMIFPVTTGDIDPAVLASLPPSMQLDLLVQMRERVMAENRQKYQKIKKEPAKFSELQIQSYLKTVAFRREIEEVQRGAAGKDVGGIQTSKIASEANREFIFSSSFTGDKQTLAQRGVGEHNVDNVKSKREISSTVFKSSPSSSSRSINPHNSEPLRDFGPDVETYCDERGRIRVSRVRA…	1.15822	14.2571	0	3.14939	4.64117	0.506481	4.38397	3.18	0.151452	2.05548	0	0	0.328002	0	0.0820005	16765.4	9739.67	14941.8	18927.8	15093.7	8777.58	11157	16127.4	16290.5	13088.1
Bradi1g71170.1	0.00529162	0.00900176	0.229445	0.00760651	0.00321655	0.431969	0.00321655	0.747318	0.276214	0.672474	0.355964	0.276214	0.747318	MGFWEAFLNWLRSLFFKQEMELSLIGLQNAGKTSLVNVIATGGFSEDMIPTVGFNMRKVTKGNVTIKLWDLGGQPRFRSMWERYCRAVSAIVYVVDAADRENMAIAKSELHDLLSKPSLGGIPLLVIGNKIDRPEAFPKQSFTEAMGLKAMTDREVACFMISCKNSTNIDSVIDWLVKHSKKKN	9556.15	24657.9	33389.1	37036.8	26160	13772	17523	18880.1	20192.5	17591.9	8507.89	8646.03	10361.3	9732.82	9312.02	6747.96	9996.69	7576.53	4581.84	7225.76	12515.2	15024.9	24051.2	26608	19549.8
Bradi1g71240.1	1.47928e-05	5.90398e-05	0.802648	0.277911	0.490671	0.000112445	0.000112445	2.88801	0.433877	0.720989	0.433877	1.43558	2.88801	MGNNSSSGGGGGHKPHRPSSSDSGLPHATAAEELSSYEAACRYDPEVRTFDSTLQRRTSRAISTLAVGVEVRSMSLDSLREVTGCLLDMNQEVVRVILDCKKDIWKSPDLFDLVEDYFESSLQTLDFCTALDKCLKRARDSQLLLHVALQRFDDEERGDAPEGASASAAAAAPSARYARTLHELRQFKAAGDPFTDEFFEAFQAVYRQQLAMLEKLQQRKHRLDKKVKTIKAWRRVSSIIFATTFAAVLICSVVAAAIAAPPVAAALAAAAAVPVGSMGKWIDSLLKGYQDALHGQKEVVSAMQVGTFIAIKDLDSIRVLINRVEMEISSMVDCVEFAERDEEAIKFGVEEIKKKLEAFMKSVEDLGEQADRCSRDIRRARTVVLQRIIRHPN	4842.43	3924.6	6773.32	5212.69	5188.26	4087.21	2683.93	3769.76	4421.81	3740.68	2216.32	1937.92	2197.67	2652.36	2251.07	9561.9	4435.09	5301.5	10494.1	7448.14	9734.84	13735.7	18831.9	17632.4	14983.7
Bradi1g71360.1	0.0446689	0.0586741	0.999611	0.397659	0.173384	0.999992	0.173384	1.95928	0.29266	1.06986	0.29266	1.95928	1.02646	MSKDAAAAADTPAAEAPAKRAPLNKYALACAVLASMNSILLGYDVSVMSGAQIFIKKDLKVTDTDIEILAGIINIFSLVGSLAAGRTSDWIGRRYTMVLAAVIFFAGALIMGLAPSYAVLMVGRFVAGVGVGYALMIAPVYTAEVAPTSARGLLTSFPEVFINTGVLLGYISNYAFHGLPLRVGWRAMFLAGAVPPVFLAVAVLAMPESPRWLVMQGRIADARKVLDKTSDTPEEAVARLEDIKNAVGIPEGVSDDDEVAAIARKSKRTHGEGVLKELLLHPTPPVRRILIACLGLQFFQQASGIDSVVLYSPRVFESAGIKTDANTLGATISVGASKTLFILVATFLLDRVGRRPLLLTSAGGMVASLLTLASALHVIGRADGGATPALSGVSIASVL…	58404	14438.9	10960.9	16781.5	25146.3	52390.8	22004.1	21330.8	11886.7	26903.1	9540.76	5259.56	4618.92	10018	7359.31	78183.9	53895.3	33488.1	31507.8	49268.8	39117.8	13907.4	23972.9	26248.3	25811.6
Bradi1g71370.1	2.28059e-07	2.40353e-06	0.0743811	0.867683	1.09042e-09	4.68708e-05	1.09042e-09	2.78291	1.13374	1.45159	1.13374	2.78291	2.09122	MMSTGTDTTADAVPVAVAPAKRPPINKYAFACALLASMNSVLLGYDISVMSGAQLFMKEDLKITDTQIEILAGVINIYSLFGSLAAGLTSDWLGRRYTMVLAAAIFFTGALLMGLAPNYAFLMAGRFVAGIGVGYALMIAPVYTAEVAPTSARGFLTSFPEVFNNFGILLGYVSNFAFARLPVHLSWRAMFLVGAVPPIFLGFAVLAMPESPRWLVMRGRIDDARYVLQRTSDSPEEAEERLLDIKRVVGIPADATDADDVVAIVRANEAARGQGVWKELLINPSRPVRRMLVAGLGLMFIQQATGVDCVVMYSPRVFEQAGIKSKTNSLGASMAVGVCKTFFIPISTLLLDRVGRRPLLLASGGGMAIFLFTLATSLLMMDRRPESESKALGAVSIAA…	372791	237947	240796	306172	289426	468460	392502	462180	357365	420127	322277	356701	309965	323593	328134	738216	876738	825905	780934	805448	751460	612538	442307	614709	605254
Bradi1g71510.1	0.223621	0.246861	0.377963	0.121036	0.418101	0.963875	0.121036	0.862196	0.373183	0.5705	0.373183	0.590919	0.862196	MESMAAVEMQTPVAVPAFDVSRRPDTAGLVLNSPTPPTFREELVGVLGKAFRPQSANGGGTGGHRSPPRWGWVLTALQAVFPVLQWGKSYTLKSFKSDVMAGLTLASLGIPQSIGYANLAKLDPQYGLYTSVVPPLIYAVMGTSREIAIGPVAVVSLLLSTMVQKVVDPAADPATYRTLVFTVTFLAGVFQVSFGLFRLGFLVDFLSHAAIVGFMAGAAIVIGLQQLKGLLGLSRFTNSTDVVSVFKAVCSALHDPWHPGNFFIGCSFLIFILATRFIGRRYKKLFWLSAISPLLSVILSTAAVYATKADEHGVKIIKNVHAGLNPSSAKQIQLNGPYTTECAKIAIICAIIALTEAIAVGRSFASIRGYKLDGNKEMIAMGFSNVAGSLSSCYVATGS…	12197.5	3569.51	2623.15	3808.09	5549.55	5417.65	2346.05	2559.37	2341.01	3166.02	2256.13	1679.45	1664.04	2684.39	2071	3737.6	4071.69	2957.25	2350.8	3279.33	6083.02	4518.25	3832.63	4705.29	4784.8
Bradi1g72080.1	1.0868e-05	4.59589e-05	1.713e-06	0.000181281	5.47014e-05	1.02122e-05	1.713e-06	0.4539	0.249482	0.249482	0.4539	0.407903	0.321497	MESDSKSAVCCMCGDHGLLPELFRCAACSVRSQHTYCTDRYPKAEAYGTCNWCLKTGQSATGNAAPSIPASSTLEAIAARPPGAAHGSDPTTCSRLMPPPANKVVVAARGDFAAELNKPIKKQQLQQQRRKLLLRRSASDLGSGRGGAGPPSPGVVARGRPRVRRYKLLEEVISS	5482.03	5270.48	2931.32	4387.72	4517.89	1117.76	1448.25	974.985	967.542	1127.13	2138.47	1811.88	2696.8	1555.52	2050.67	1985.3	2142.82	1289.15	1954.16	1842.86	1487.64	1763.99	882.294	1676.03	1452.49
Bradi1g72092.1	0.311403	0.336244	0.17331	0.293003	0.87572	0.692052	0.17331	0.836864	0.543184	0.543184	0.61618	0.836864	0.768028	MYKLGGRGSGRGGGGAKRPPAPHGRGRGASSSTSIGGVAPPPRGRAAAAAAAAAAAAAAAQAAGRDESFSLESSGPPSFAAIIRLTPDLVDEIRRAEEAGSGARIKFNSNMFNSAENIIDVGGKEFNFTWASERGELCDIYEERQSGEDGNGLLTERGSAWRKVNVQRILDESAQNLVKMRSEEAERLSKSRKSIVLDPGNPSVKSQAKSMTAAAVEGNMRRMKWNQKKDFKKNQAAVIPTKSISKVKLSNSTPKGNLSTSPAPSPEQPFPARSAANNEVIIPFELNKEETSKVEKATPNRISQGINRRASAVSASIDDTTTDLRSLLIAILSENPKGMNLKALEKAVADTIPNASKKIEIIIKNIANFQTPGRYFLKPELEVENSKRRASGSGSCYFL…	20718.6	7873.67	7363.58	5191.39	10286.8	5089.5	5050.58	6444.71	5765.76	5587.64	6526.18	5963.94	5632.43	7231.57	6338.53	9437.7	6914.89	9401.95	8680.13	8608.67	9047.38	6814.15	8244.11	7496.64	7900.57
Bradi1g72320.1	0.000115663	0.000322374	0.00280384	0.00247839	4.48656e-05	0.000147332	4.48656e-05	2.27222	1.824	1.824	1.82968	2.27222	2.10974	MRVVVTGATGYLGGRLCAALAGAGHAVRAFVRRTSDASGLPAGAELAYGEVGDVDSLAAAFDGCDAVFHVAAVVEPWLPDPSVFATVNVGGLENVLKAAKRTPTVKKIIYTSSFFAVGPTDGYVADETQMHQGKTFCTEYEKSKVLADRIALQAAAEGVPITIVYPGVIYGPGKLTTGNLVSRILIERFNGRLPGYIGDGYDRESFCHVDDVVSGHVAAMEKGRVGERYLLTGENMSFMQIFNMAANITNTKAPSFHVPLWLIEIYGWISVFISCITGKLPLISYPTVHVLRHQWAYACDKAKRELGYSPRNLTEGLSEMLLWLKDDKLIKF	5050.3	3294.56	5518.48	4484.46	4586.95	6797.12	10444	9204.09	7021.28	8366.62	7709.05	9286.1	8137.8	8437.63	8392.65	11864.3	9319.16	11206.1	9300.69	10422.6	7701.37	10808.4	10442.7	9756.61	9677.25
Bradi1g72400.1	8.99327e-08	1.21355e-06	0.999997	1	3.73548e-05	3.99583e-07	3.99583e-07	74.8104	0.617656	0.617656	1.10135	61.935	74.8104	MDTGCLSSMNITGANQVRSFVGQLHIQRGFTSSSVQTLKGSRRASFSLKTPVLRNKGKGLRRGPGVLQVVCQDFPRPPLESTINYLEAGQLSSSFRSSERPSKPLQVVIAGAGLAGLSTAKYLADAGHKPILLEARDVLGGKIAAWKDEDGDWYETGLHIFFGAYPNIQNLFGELGINDRLQWKEHSMIFAMPNKPGEYSRFDFPETLPAPLNGVWAILRNNEMLTWPEKVKFAIGLLPAMLGGQAYVEAQDGLTVSEWMEKQGVPDRVNDEVFIAMSKALNFINPDELSMQCILIALNRFLQEKHGSKMAFLDGNPPERLCMPIVNHIQSLGGEVRLNSRIQKIELNPDRTVKHFVLSDGSNITGDAYVFAAPVDIFKLLVPQEWKEISYFKKLDKLV…	1180.7	2852.31	4404.34	3428	2966.34	1123.04	2226.16	1800.86	2178.65	1832.18	4494.24	2668.58	2597.27	3307.81	3266.97	239867	128510	167427	199076	183720	145218	200998	291751	249685	221913
Bradi1g72430.1	0.631951	0.647306	0.975943	0.987268	0.990481	0.726866	0.726866	1.04206	0.887761	0.949769	1.04206	1.0389	0.887761	MGRRRRGGGMLDAPWLPLLLLVCCAWPQKQILVSADTNANDVTVLNTLFTSLNSPGQLKGWQASGGDPCGQSWQGITCSGSSVTAIKLPSLGLSGNLAYNMNTMGSVVEIDMSQNNLGGGQAIQYNLPTDKLERLNLAGNQFTGNLPYSIFSMSKLKYLNLNHNQLQGKMTDVFSNLDSLTTVDLSFNSLTGDLPDSFTALSSLKTLYLQNNQFSGSINVLANLPLTDLNIANNRFTGWIPSQLKKINSLQTDGNSWTSGPAPPPPPYTAPPANRRKSPGQKNDGSSSSGGKSGIGGGGVAGIIISLLVVGAVVAFFVIRKRKRKATMEEHFEQHQPFTSFPSNQVKDVKPFEESATIDVESLASPASASLKLPPKIERHKSFDDDDFSNKPVPKKSNA…	138688	181382	203037	189240	178087	181591	195206	135689	164080	169141	163154	168729	170685	239743	185578	207460	186716	189014	156865	185014	167494	116633	190248	158018	158099
Bradi1g72560.1	0.000428355	0.00100496	0.862199	0.0042179	0.00170657	0.00121319	0.00121319	0.883508	0.285822	0.883508	0.38762	0.311552	0.285822	MAREAEEQALLSTEIVNRGVEPSGPDAGSPTFSVRVRRRLPDFLQSVNLKYVRLGYRYMLSHGVYLATIPVIVLVCGAEVGSLSRDELWRKVWDEATYDLATVLAFLAVLAFTISVYIMSRPRPIYLIDFATYKPPEELKVSKAEFIDLARKSGKFDEESLAFQSRLLAKSGIGDESYMPRCVFQPDANCATMKEGRAEASAAMFAALDELFDKCRVRPKDVGVLVVNCSLFNPTPSLSAMIVNHYKMRGNILSYNLGGMGCSAGVISIDLARDMLQASGAGLAVVVSTEAVSFTWYAGKRRSMLIPNAFFRAGCAAVLLSNRRRDFHRAKYQLEHIVRTHKGADDRSFRSVYQEEDEQRIKGLAISRDLVEVGGHALKTNITTLGPLVLPFSEQLLFF…	87320.5	126852	108215	86331.8	102180	56938.3	51793.9	110721	141653	90276.7	41647.8	35703.9	44464.2	36611.9	39606.9	22276.4	20157.4	45624.5	39278.9	31834.3	37580.1	24503.8	22366.5	32370.7	29205.3
Bradi1g72640.1	0.000447777	0.00104326	0.117151	0.000479947	0.00231445	0.000764072	0.000479947	0.793822	0.51781	0.793822	0.51781	0.609777	0.558721	MSRGSGAGYDRHITIFSPEGRLYQVEYAFKAVKSAGVTSIGVRGKDSVCVVTQKKVPDKLLDETSVTHLFPITKYIGLLATGLTADARSLVSQARNEAAEYRKKWGYEMPVDVLAKWIADKAQIYTQHAYMRPLGVVAMVLGYDEEKNAQLFKCDPAGHFFGHKATSAGLKEQEAINFLEKKMKDSPQFTYDETVQIAISALQSVLQEDFKATEIEVGVVRKEDRVFRALTTEEIDQHLTAISERD	13394.2	18820.3	17452	15163.2	16207.4	12991.1	10484	15691.7	12296.5	12865.8	7987.46	7398.21	6651.04	11532.8	8392.38	6608.04	10185.2	11990.2	10748.2	9882.93	8488.14	8472.95	10720.1	8540.53	9055.44
Bradi1g72762.1	0.000142637	0.000386379	0.920208	0.05175	0.00307566	0.999115	0.00307566	1.24819	0.619644	0.942305	1.24819	0.619644	0.983205	MGASLSLVPLIDYFARREFLAAGLRPNTATLPYPDGGPSASCTVHYWAPPGEPRLPPLLLVHGFGPRATWQWRCQVGPLSRRFHLIVPDLLGFGGSSCGSSSAAPPPPSEATQAAALAALLDSLPGLNSKDDSGKIKRVAVAGTSYGGFVAYWLARAAGEARVGPVVIASSDLLKTAADDRGFLKRAGDGWGGVHELLLPAQPAAMRRLMEMAVYRPPPPLMTPDFVLRDFIQKLFTDNREQLIHLLKGITVGTDKFQVTPLSQEVLIVWGEHDQLFPVEKAFAIQRSLDGKARVEIIKKTSHTPQLEDPARFNKILLDFLQAADAPADPACIKGSSQ	12173.5	11570.5	14808.8	12133	12671.4	10002.2	12903.2	12646.9	12209.2	11940.4	16729.8	17075.1	14351.3	15109.3	15816.4	6074.96	9827.49	7855.78	7648.91	7851.78	9584.61	12860.2	15310.3	12079.5	12458.6
Bradi1g72927.1	0.0804717	0.0989575	0.999048	0.389403	0.344172	0.962342	0.344172	1.24233	0.770787	0.971854	0.770787	1.24233	1.07548	MRAAATSTAISLLSSSRLRTSTPARLPFRCRRPLRLAAMATNASFRPEAARSPPAVEPPTPPLSKFKVALCQLSVTADKARNIARARTAIESAAADGAKLVLLPEIWNGPYSNDSFPEYAEDIEAGGDAAPSFLMMSDVARSLKITLVGGSISEHSGNSLYNTCCVFGSDGELKGKHRKIHLFDIDIPGKITFQESKTLTGGQDLTIVDTDVGRLGIGICYDIRFQELAMLYAARGAHLLCYPGAFNMTTGPLHWELLQRARCVSSESFAPRDMRWGQYFC	3842.95	3064.09	4019.29	3579.19	3626.38	3745.54	3267.11	3676.73	3407.87	3524.31	2225.92	2523.63	2544.27	3886.85	2795.17	2673.85	5948.99	4157.25	5240.6	4505.17	4213.85	3865.15	3310.09	4211.37	3900.12
Bradi1g73170.1	0.00351687	0.00632568	0.978099	0.471972	0.00176686	0.125353	0.00176686	2.46499	1.14032	1.14032	1.45063	2.46499	1.7297	MAHGEVELSVGVGGGGGGAGGAMEAPVRISIGRLVLAGMVAGGVQYGWALQLSLLTPYVQTLGLSHALTSFMWLCGPIAGLVVQPCVGLYSDKCTSRWGRRRPFILTGCVLICLAVVIVGFSADIGAALGDSKEECSLYHGPRWHAAIVYVLGFWLLDFSNNTVQGPARALMADLSGQHGPSAANSIFCSWMALGNILGYSSGSTNNWHKWFPFLRTRACCEACANLKGAFLVAVLFLSFCLAITLVFAKEVPYKAIAPLPTKANGQVEVEPTGPLAVFKGFKNLPAGMPSVLLVTGLTWLSWFPFILYDTDWMGREIYHGDPKGNPNEVTAFNDGVRAGAFGLLLNSIVLGFSSFLIEPLCKRLGPRVVWVSSNILVCIAMAATCIISWWSMKDFHGY…	31253.5	17251.3	27961.2	38536.8	28750.7	41394.6	36974.3	27605	25165.9	32784.9	50107.4	51055.4	29119.9	36543.2	41706.5	84410	96989.4	61599.4	40481.9	70870.2	53661.7	50070.9	48891.3	46296.4	49730
Bradi1g73770.1	0.00166227	0.00331226	0.222538	0.430879	0.000323064	0.0402303	0.000323064	2.34251	1.37381	1.48869	1.37381	2.34251	1.73481	MASPSSSLCSSLGYPRAASFGHRRRVVFSSTRKVFQVKASSRVDKFSKSDIIVSPSILSANFAKLGEQVKAVEVAGCDWIHVDVMDGRFVPNITIGPLIVDALRPVTDLPLDVHLMIVEPEQRIPDFVKAGADIVSVHCEQTATIHLHRTIDQIKSLGAKAGVVLNPGTPLSAIEYVLESVDLVLIMSVNPGFGGQSFIESQVKKIADLRKLCEEKGVNPWIEVDGGVSPKNAYKVIEAGANALVAGSAVFGAKDYAEAISGIKTSQRPVAVPA	31647.6	22804.2	24766.2	43562.3	30695.1	51123.5	50679.6	45293.5	35684.5	45695.3	42160	43477.9	38582.3	44456.9	42169.2	64059.5	103204	65884.3	54465.9	71903.4	46376.4	55679.7	57230	53714.9	53250.2
Bradi1g73780.1	7.18887e-06	3.30982e-05	0.994948	0.854184	3.17853e-05	0.0245484	3.17853e-05	5.22297	0.514556	0.818793	0.514556	5.22297	2.94414	MAAAAGWLRRAASAVSLPRMPSGLPLMPTPPPAPLPEAQSLVLPGLGAAVGPAMELMAVPKKKISKYKRGLRNGPKALKPVPVIVRCRCCGRVKLPHFYCCSGERGNPGDSSS	3303.59	4312.4	679.571	1980.12	2568.92	2130.05	2086.05	2085.18	2112.38	2103.41	1288.06	1422.24	1670.48	906.629	1321.85	13694.6	8374.65	15199.1	16401.2	13417.4	3738.1	6429.26	11606.4	8479.35	7563.27
Bradi1g74350.1	2.56153e-08	4.54672e-07	0.999566	0.999957	0.0309108	3.65234e-09	3.65234e-09	35.7075	0.523406	0.523406	0.734715	10.2807	35.7075	MEHAVLPVPGRVKEEWSPEEEEEAPRPMEGLHETGPPPFLTKTFDLVADPATDGVVSWGRAGNSFVVWDPHVFAAVLLPRSFKHNNFSSFVRQLNTYGFRKIDPDRWEFANEGFIRGQRQLLKMIKRRKPLPYLPSSQQQVLGSCLEVGQFGMDEEIEILKRDKNALLAEVVKLRHDQQSTRADMRAMEERLHLAEQKQLQMMGFLARAMQNPDLFLQLIEQQDKWKDDASLKRRRSIDMAPFLSPREATQNEQHKSTILSEPREFAVPNQPGFSELENLALSIQGIGKGTKDDKGCQNQVSGEVELTDDFWEELLSEGMKDESGMPEPETRRPRYVDA	57.5712	648.991	2288.26	380.769	843.898	248.12	13.3046	679.262	826.118	441.701	85.1876	528.362	639.279	1227.27	620.024	10627.5	6116.51	8108.8	9850.72	8675.88	23099.9	23769.6	39299.1	34365.4	30133.5
Bradi1g74370.1	7.61154e-09	1.8669e-07	0.999999	0.955223	1.68443e-10	1.87841e-05	1.68443e-10	376.668	1.99836	1.99836	17.6544	376.668	207.723	MGMQCMVTEVGDATAARAEVMGLWRRAARDELRRWRVAADEMVLRRRVAEMGCGGGDGGSGGGAGRPNLALPRRRVAGWDLGWERRQGSPNGESGLGRRSVDRDEETRQPKTETHHAREEQYGLMGRKISPINQKTWIFLTEQRPVGQLAQAGCTERSNGHKCSEVEIVRSETLMA	0	0	241.67	22.5574	66.0569	368.789	159.232	0	0	132.005	1777.89	901.308	1080.36	905.215	1166.19	30551	22993	16921.3	29060.6	24881.5	14402.1	12062.1	16437.2	11984.7	13721.6
Bradi1g74420.1	1.43052e-06	9.94728e-06	0.851376	0.384489	1.29136e-06	0.111514	1.29136e-06	3.26133	0.556498	1.22519	0.556498	3.26133	1.66579	MGGSSEENKKKNVNGSGAGETMRAAPRVPVPEARPFLDTFRANLKETFFPDDPFRSVVRERGFGRRAMAALRYFFPFLEWIPSYRLGAFKSDLISGITIASLAIPQGISYAKLANLPPILGLYSSFVPPLVYAMMGSSRDLAVGTVAVASLLIGSMLGAEVSPTENPALYLHLAFTATFFAGVFQASLGILRLGFIVDFLSHAAIVGFMAGAATVVCLQQLKGMLGLEHFTTSTDLVSVMRSVFSQTHQWRWESVVLGSGFLFFLLLTRFFSKRRPKLFWISAAAPLTSVILGSVLVYLTHAENHGIQIIGYLKKGLNPLSVTSLNFTPPYMMLAVKTGIITGVIALAEGIAVGRSFAMFKNYHIDGNKEMIAIGTMNVLGSFTSCYLTTGPFSRSAVN…	56312.7	30567.2	32263.7	29169.6	37078.3	29250.4	27430.4	66687.9	58342.6	45427.8	21832.4	25184.2	18087.1	17432.3	20634	89221.5	128871	129784	135822	120925	75590	49651.6	63992.7	57824.9	61764.8
Bradi1g74910.1	0.415566	0.439685	0.433494	0.700999	0.957489	0.991534	0.433494	1.18262	0.958178	1.18262	1.1296	1.06575	0.958178	MGCSSSVPARSTGGLNNINDNSTATDSNELRAKLVLLGDSGVGKSCIVLRFVRGQFDPTSKVTVGASFLSQTLALEDSTIVKFEIWDTAGQERYAALAPLYYRGAAAAIVVYDITSPESFKKAQYWVKELQKHGNPGIIMVLVGNKADLHESRSVPTQEAQEYAEKNSMFFMETSAKTADNINQLFEEIAKRLPRPTAS	6638.96	7812.67	9826.96	7009.4	7822	8176.69	8366.6	8397.26	12061.3	9250.46	7806.98	7778.24	9913.4	9844.26	8835.72	9014.26	9434.95	7694.19	7201.77	8336.29	8706.73	7155.65	8306.7	5810.38	7494.87
Bradi1g74922.1	0.01176	0.0180481	0.0047151	0.14367	0.0143327	0.31117	0.0047151	0.830426	0.604323	0.604323	0.782269	0.659538	0.830426	MATPPTQGEPSSSDPKSKKDYSTAILERKKSPNRLVVDEATNDDNSVVALHPDTMERLQLFRGDTVLLKGKKRKDTICIVLADETCEEPKVRMNKTVRKNLRVRLGDVVSVHQCPDVKYGKRVHILPIDDTVEGITGNLFDAFLKPYFLEAYRPLRKGDLFLVRGGMRSVEFKVIETDPAEYCIVAPDTEIFCDGEPIKREDEERLDEVGYDDVGGVRKQMAQIRELVELPLRHPQLFKSIGVKPPKGILLFGPPGSGKTLIARAVANETGAFFFLINGPEIMSKLAGESESNLRKAFEEAEKNAPAIIFIDEIDSIAPKREKTNGEVERRIVSQLLTLMDGLKSRAHVIVMGATNRPNSIDPALRRFGRFDREIDIGVPDEVGRLEVLRIHTKNMKLA…	395690	350953	304166	205440	314062	182312	194680	152736	229451	189795	247053	204939	233946	296786	245681	195295	211514	245852	175881	207136	257105	273703	264135	248277	260805
Bradi1g74930.1	8.56038e-06	3.86219e-05	0.0092245	1.77468e-06	0.0003016	0.742265	1.77468e-06	1.6256	1.079	1.29503	1.6256	1.43738	1.079	MTVIDILTRVDSICQKYDKYDAEKLNGANVAGEDPFARLYGSVDAYISQCVEKAELAKQEKNRAAVVALNAEIRRTKAKLLEEDLPKLQRLALKKVKGLTREELATRTDLVAALPDRIQSIPDGSATATKKNGTWGGASGSRTGGGIKFDSTSDGNFDDEYFKGTEESNKFRQEYEMRRMKQDEGLDVIGEGLATLKNMASDMNEELDRQVPLMDEMDHKVDIANADLKNTNVRLKQTILQMRSSRNFCVDIVLLCVILGIAAYLYNVLKK	13281.2	12302.1	14648.7	13884	13529	18109.3	18893.8	16379.9	16698.9	17520.5	22057.6	21940.5	23447.5	20525.4	21992.7	21623.9	18324.7	20967	16869.4	19446.3	14265.7	12241.7	15063.7	16819.9	14597.8
Bradi1g75140.1	3.74764e-06	2.08048e-05	0.999815	0.0583709	0.000191147	0.0037847	0.000191147	1.27337	0.433974	1.01273	1.27337	0.433974	0.579816	MRSSSSTSSGGGRRRRTSDYHGGRASSGDLSRFSVATAASSSSSAPAASERSANGGRGAAFLDAFRSCFSPAEARSPDTSLSEDFHPSRQLSQSISSQGSSSGSTFESKRSTRGLYGPIHRNSSEREIPGDRKFSLPEIQKATKNFSPNLKIGQGGSGTVYRGQLSDGTLVAVKRAKKNLYDKHMGHEFRNEIETLRCIEHLNLVRFHGFLEYGGEQLIIVEYVPNGNLREHLEGLNGKFLEFSVRLEIAIDVAHAITYLHTYSDQPVIHRDIKSSNILLTNNCRAKVADFGFAKLAPSDATHVSTQVKGTAGYLDPEYLRTYQLTEKSDVYSFGVLLVELVTGRRPIDPKRTIIERVTAKWAMEKFAEGDAILTLDPNLEATDAINLAVEKIYELALQ…	14635.8	14415.2	15014.9	13720.9	14446.7	14474.8	14603.5	13149.8	16294.5	14630.7	13977.9	22949.3	17175.1	19481.7	18396	5348.3	5898.6	7152.18	6678.9	6269.5	8064.71	5475.55	8859.85	11105.7	8376.44
Bradi1g75290.1	8.60194e-05	0.000253917	0.432554	0.0643301	0.000204641	0.000115369	0.000115369	0.837917	0.347686	0.837917	0.70833	0.369493	0.347686	MPISRVAVGSHHEVYQAGALKAAVAEFISTLIFVFAGQGSGMAFNKLNAGGAATPAGLISAAIAHAFALFVAVSVGANISGGHVNPAVTFGAFLGGNITLFRGLLYWVAQLLGSTAACFLLRFSTGGLPTGTFGLTGVSVWEALVLEIVMTFGLVYTVYATAVDPKKGSIGTIAPLAIGFIVGANILVGGAFDGASMNPAVSFGPALVSWEWGYQWVYWVGPLIGGGLAGVIYEVLFISHTHEQLPTTDY	335373	583613	720126	553795	548227	401400	473381	434156	528536	459368	359538	470110	390839	332816	388326	307440	175461	156536	170826	202566	158784	168979	228501	206177	190611
Bradi1g75590.1	2.60614e-11	6.47397e-09	1	1	4.02567e-13	1.5199e-13	1.5199e-13	58975.5	0.0232273	0.0232273	0.150563	54678.4	58975.5	MPRFLQSPLPLTEAAAAAAHAALLALALLLLLLRAARALASRCASCLKPHRRGPAADAAAAAASSSSTGAWYRAALACCGYALLVQAGALGYEVAAAGPRVAVEALLLPGVQALAWATLLALALQARAGGWGRFPALVRVWWVVSFALSVAIAYDDSRRLMGDDASKVDYAHMVANFATLPALGFLCLVGVMGSSGVELDFSDATGVHERLLLGGQRRDAEEEPGCLRVTPYGDAGIVSLATLSWLSPLLSVGAQRPLELADIPLLAHKDRSKFCYKAMSSHYERQRTEFPGKEPSLAWAILKSFWREAVINGTFAAVNTVVSYVGPYLISYFVDYLSGKIAFPHEGYILASVFFVAKLLETLTARQWYLGVDIMGIHVKSGLTAMVYRKGLRLSNASR…	14.4245	1.09079	4.36998	0	4.97132	0	0.46188	0	0	0.11547	0	0	2.95612	0.0378576	0.748494	276169	223859	299664	287602	271824	224676	286160	348816	313092	293186
Bradi1g75620.1	5.3835e-07	4.68538e-06	0.431825	0.00351909	7.01022e-08	2.46929e-06	7.01022e-08	0.913169	0.455077	0.913169	0.75608	0.455077	0.545948	MPAGHGLRSRTRDLFARPFRKKGYIPLTTYLRTYKVGEHVDVKVNGAVHKGMPHKFYHGRTGRVWNVTKRAIGVEINKQVGNRIIRKRIHVRVEHVQPSRCAEEFRLRKVKNDQLKAEAKARGEVISTKRQPAGPKPGFMVEGTTIETVTPIPYDVVNDLKGGY	126604	159767	151039	145252	145665	113592	139721	137783	140971	133017	117372	118425	83023.5	121717	110135	74536.3	70569.5	56349.7	63700.2	66288.9	77489.9	77651.3	82635.9	80325.3	79525.6
Bradi1g75750.1	0.000201596	0.000520316	0.999962	0.996797	0.0152771	0.000688899	0.000688899	14.0537	0.314999	0.778668	0.314999	9.94343	14.0537	MICAISGEVPEEPVVSKNSGLLFERRLIERYIEDHGKCPVTKDELAMDDLVAVKTNKITKPRPLQAASVPGLLGMFQNEWDALMLSNFALEQQLHTSRQELSHALYQHDAACRVIARLKKERDESRTLLAQAERQIPISAAGAAPVAVVTNGKIALDDEVGPDGKKMRPGINPVMIDELTECNSMLSAQRKKRQVPPSLASIDALERYTQVSSHPLHKTNKPGILSIDIHHSKDIIATGGIDTNAVLFDRPSGQVLCTLTGHSKKITSLKFVPWDELLITGSADKTVRIWQGSEDGNYGCRHTLKDHNAEVQAVTVHATQKYFVTASRDNTWCFYDISTGSCLTQVGEASGQDGYTAAAFHPDGLILGTGTSEAVVKIWDVKTQSNVAKFDGHVGAVTA…	2212.94	1162.13	3032.9	5047.91	2863.97	0	3100.99	2116.39	3702.96	2230.08	0	0	1020.8	2587.79	902.148	24509.7	15036.5	31628.7	42736	28477.7	9962.05	42104.8	57201.8	51728.9	40249.4
Bradi1g75820.1	6.59846e-05	0.000204628	0.998093	0.921613	0.0686969	0.000144883	0.000144883	2.93255	0.789394	1.07509	0.789394	1.86052	2.93255	MAVAESLAMESGAGAAEYAQDGSVDLRGNPVLRSKRGGWTACSFIVVYELFERMAYYGIAANLVIYLTEKLHQGTVEASNNVTNWSGTVFLTPLLGAYVADAYLGRYWTFVVGSVIYFIGMVLLTLSVTVHKLQPAECAGKVCPRATTLQLGIYFGGLYIIALGNGGTKPNISTIGADQFDEFDPREKSHKLSFFNWWMFTIFLGILFSTTVLVYLQDNVSWAVGYGIPTLGLVLSICIFLAGTPVYRHRVPQGSAFSRMGKVIAAALSKWRAQVPADAKELHELDLDAHYTKKRKYRMDSTSSMKFLNKAAVKDAVDWRLCTVTEVEETKQMVKLLPLLAAMFVPCTLIAQTNTLFVKQGTTLDRHMAPGSSFQIPPASLGAFVTLTMLIAVVVYDRC…	7021.08	3468.55	5897.36	5919.57	5576.64	6941.94	7418.48	4900.15	4720.96	5995.38	4606.47	3825.85	3967.82	5208.53	4402.17	14871.7	4955.23	9330.75	12344	10375.4	17916.7	13825.9	20576.1	13096.4	16353.8
Bradi1g76020.1	0.036818	0.0493713	0.0323211	0.407989	0.998265	0.340927	0.0323211	1.64734	0.952187	1.64734	1.32626	0.952187	1.35406	MEAATMAWTAAVAGVGLVYWFVWVMGSAEVKGKRAVDLKMGSINRDNVKDKYTQYWSFFRRPKETATDEASAEKVPAFVDTFYNLVTDIYEWGWGQSFHFSPSLPGRSHRDATRVHEERVADLLKAKPGHRLLDVGCGVGGPMRAIAAHSGSNVVGITINEYQVNRARSHNRKAGLDSRCEVVCGNFMSMPFDDASFDGAYSIEATCHAPRLQDVYGEVFRVLKPGGLYVSYEWVTTALYRAEDPDHVEAIHGIERGDALPGLRRQDEIASIAKEVGFEVVQELDLALPPALPWWTRLKMGRLAYWRNSLVVRVLTILRVAPKGVVEVHEMLYETAQHLTRGGETGIFTPMHMVLLRKPSTAAAAESK	6590.97	11293.7	8240.04	10885.6	9252.58	16471.2	12417.8	14935.6	17144.1	15242.2	11638.3	9681.81	13139.9	14625.3	12271.3	8509.13	8030.22	8213.9	10487.5	8810.19	15589.1	7055.01	17982.2	9488.06	12528.6
Bradi1g76177.2	2.38879e-05	8.68593e-05	0.0614763	0.0241832	0.00115683	0.998253	0.00115683	1.17547	0.693077	1.17547	0.792066	0.693077	1.01463	MALPSPPANLAAPAAVLLLLLFLAGTASAANFTCAAQGSTCQSAIGYVAPNATTYGELLARFNTSTLADLLGANNLPATTPSTARVPAKATVRIPFRCLCAAAGNGASVVGRSDRVPVYTVQPNDWMDAIARNVFDAFVTFQEIADANNIPKPDQIGVGQKLWIPLPCSCDQVLGSDVLHYAHTVAAGETTSGMAAKFGVLESTLVTLNKIADPKNLLQGQILDVPLPVCASSISSTSADHNLLRLPNGAYALTAQDCIQCSCSSNTYQLNCTSTQGKGCPAVPPCNGTLKLGQTNGTGCGSTTCAYSGYSNSSSLSIQTTLVSNQTTACQNSGSERSEFSGSMWMMVAISFHMVLILICFL	847880	897371	915176	955136	903891	1.17262e+06	971331	1.09828e+06	1.00776e+06	1.0625e+06	644918	654952	777408	786487	715941	570354	635081	601707	698722	626466	1.03151e+06	1.02896e+06	773583	834411	917117
Bradi1g76227.1	1.59098e-07	1.8502e-06	0.00422068	1.15651e-08	0.353397	0.325311	1.15651e-08	2.0433	1.15427	1.38501	2.0433	1.15427	1.1598	MGCCRSSLRDGTHPEKPTEKAAGAQPNWPSFSVNPHQAAAPSSEAAAGGRGGEVAAFKEYSLAELSAATGGFARENIVSESGEKAPNFVYKGRLRSTRRAIAVKKFTKMAWPDSKQFAEEARGVGKLRHRRLANLIGYCCDGDERLLVAEFMPNDTLAKHLFHWENQTIEWAMRLRVSYHIAEALDYCCNEGRPLYHDLNAYRVLFDKNGDPRLSCFGLMKNSRDGKSYSTNLAYTPPEYLRNGRVTPDSVIFSFGTVLIDLLSGKRIPPSHALDMIRGNNIQLLMDSHLEGNYSTQEATALVDLASQCLQYEPRDRPDTKKLVTVLEPLETKSEAPSYEMLGIPKHEEEAAPPQRPPSAMAEACSRMDLTAIQQILVATHYRDDEGTNELSFQEWTQQ…	166162	136852	158952	153849	153954	250060	230280	183468	189103	213228	302358	335787	294363	325784	314573	207565	159023	178394	165834	177704	193871	171291	186511	162548	178555
Bradi1g76330.1	0.00848604	0.013612	0.00921858	0.979586	0.0314706	0.741392	0.00921858	1.70895	1.08295	1.70895	1.08295	1.58636	1.18974	MDPYKHRPSSSFNGPMWSTNSGAPVWNNDNSLTVGPRGPILLEDYHLVEKIANFDRERIPERVVHARGASAKGFFEVTHDISHLTCADFLRAPGVQTPVIVRFSTVIHERGSPETLRDPRGFAIKFYTREGNWDLVGNNFPVFFIRDGMKFPDMVHSLKPNPKSHIQENWRILDFFSHHPESLHMFTFLFDDIGIPADYRHMDGSGVNTYTLVNRAGKSHYVKFHWKPTCGVKSLLDDEAVTVGGTNHSHATKDLYDSIAAGNYPEWKFYIQIIDPDHEGRFDFDPLDVTKTWPEDIIPLQPVGRLVLNRNIDNFFSENEQLAFCPGIIVPGIYYSDDKLLQTRIFSYSDTQRHRLGPNYLLLPANAPKCAHHNNHYDGTMNFMHRDEEVDYFPSRFDP…	39826.9	44574.9	37171.7	41689.7	40815.8	62491.5	98634.1	63278.9	54603.7	69752.1	48579.6	45346.3	48710.9	34169.1	44201.5	58621.8	79458.3	53135.2	67778.1	64748.3	47051.9	56143.9	37084.9	53959.9	48560.1
Bradi1g76400.1	0.222664	0.24641	0.233759	0.999902	0.49133	0.437224	0.233759	1.01908	0.661694	0.661694	1.01908	0.755313	0.738869	MSGTEAFEAYFRRADANQDGRISGQEAVAFFQGASLPQQVLAQVWMHADQNKTGFLGRPEFFNALRLVTVAQSGRQLTPDIVQSALYGPAAARIPPPKIAMGPSPPQVGEAGAPRPQGNAAMTPAPGQVGAAQQMNPAATPRPQGNAAMAPGPAPVGAAQMNSAAAPRPQGSGMMPTSTQFGGAPQVNAGAVPRPQGINSMMPAASHGGAMPPTQFTGPRAPQSQSPNMGFNQQLPPSSTGFMRPPQVGALPTSLQATGMNQSPLGGGSMGGSIGWQGGNVGSVGGISQPSPGAAVPSQATSGGFSTMGMAPGLQAQPLSTSPLPPQSNSAVLPQDSRALVLSGNGPASGSGTSPDIFSALSQTKPSIPTPAPPTSMMPNSSSFMSTPTGSQNLANLTQ…	29141	17955.1	14546.7	10052.3	17923.8	10787.1	9510.62	14162.1	12980.5	11860.1	19568.6	12251.1	23165.4	18077.6	18265.7	9413.78	14420.8	17281	13036.7	13538.1	15868.6	10858.6	13022.4	13223.8	13243.3
Bradi1g76470.1	0.00564886	0.00952539	0.0384386	0.0375351	0.0010035	0.0581595	0.0010035	1.65794	1.37122	1.40181	1.40359	1.65794	1.37122	MAAHAALAASRIPTGRLQHGKAASSKLQRLDLADFSGLRPGSCSVSVAATREASFSDVLGAQLVARASGENAVRAPAEAKLKVAINGFGRIGRNFLRCWHGRENSPLEVVVINDSGGVRNASHLLKYDSMLGTFKADVKIVDNETISVDGKNIQVVSNRDPLKLPWAELGIDIVIEGTGVFVDGPGAGKHIQAGAKKVIITAPAKGADIPTYVLGVNEEGYDHDVANIVSNASWTTNCLAPFVKVLDEEFGIVKGTMTTTHSYTGDQRLLDASHRDLRRARAAALNIVPTSTGAAKAVALVLPQLKGKLNGIALRVPTPNVSVVDLVINTAKTGITADDVNAAFRKAAAGPLNGILDVCDEPLVSVDFRCSDVSSTIDASLTMVMGDDMVKVVAWYDNE…	459823	386367	494708	603922	486205	711792	854277	602308	557901	681569	690588	731806	618274	689055	682431	811265	970593	763547	678989	806099	589694	647225	714725	715124	666692
Bradi1g76630.1	3.79437e-08	5.96511e-07	0.988615	6.96181e-06	0.000943905	0.0028988	6.96181e-06	1.88627	0.397321	1.04523	1.88627	0.397321	0.471853	MAGERPVVAPGVVVLLLCCLAAPMVRGGGGGGGVQHNITSFLNGHPEYKLYNKYLTETRVCDEINARAAVTCLVLNDGAMATLVADAGESSLAGIKAALRLHSLLDYWDTKKLRSLTTTNLTDTFFQAAGDAMGTVKIAKLDSGDFGFASANKGAKFDATLVKAVKQTPYDFAVLEISAPIEFDGLFDVPDAANLTRLLEKAGCKRFAALVAGNPGVLKAYQAAMATGLTLFAPNDDAFVAKAGTPDVGKMEKDDLVRLLMYHAVPAYEPKPSLKLVKAGARPLRTLASTAAGEYNVTVVARGDDVSLDTGVRKSRVAATVLDEVPLCVLTVDSLLMPVELFADAPMPAPAPAPAMAPADAPLGSSSSSPPAPPPADAPSEVADHKAKHVKSTAAALRS…	7762.27	8568.95	11223.1	9691.98	9311.58	7290.37	8488.82	11354.8	11797	9732.75	14877.9	16744.6	19060	19574.4	17564.2	3990.96	4162.52	2640.48	4004.79	3699.68	2686.82	5717.25	4583.1	4587.63	4393.7
Bradi1g76960.1	0.000242298	0.000610953	0.598259	0.0242438	0.0764663	0.151665	0.0242438	1.39704	0.679913	1.15073	1.39704	0.679913	0.728708	MASSQANLDKMQLRQSYRNLWHTDLMSTIQADFPYCCLSLWCAPCVSYMLRKRALYNDMSRYVCCAGYMPCSGRCGESRCPEFCLATEVFLCFGNSVASTRFLLQDEFNIQTTKCDNCIIVLSTPSYVTNFPILRFSTDNHVLLQGFMFCLQQVACIFSIVAAIVGSEELSEASQILSCLSDMVYCSVCACMQTQHKVEMDKRDGKFGPQPMSVPPVQQMSRIDQPIPPPAGYAPQPAYGQPYGGYPPPPAQGYPQPPAQGYPPAGYPQAQGSAYPPPGSYPPPQGYYGK	57737.5	71002.8	73599.6	69829	68042.2	103527	78305	63176.3	68185.1	78298.3	77354.6	91269.3	98785.5	112822	95057.9	34630.7	40212.1	51303.5	58904.7	46262.8	54575.3	39399.3	52139.6	52217.4	49582.9
Bradi1g77247.1	0.00973465	0.015219	0.250343	0.103223	0.468588	0.837661	0.103223	1.97985	0.238934	0.238934	1.97985	1.57926	1.33595	MARAEANWERLVRAALRGERMGGAYGLPVSGIAGNVPSSLGNNTHIDEVLRAADEIQDEDPTVARILCEHAYTLAQNLDPNSEGRGVLQFKTGLMSVIRQKLAKREVGAIDRSQDIAKLQEFYKLYREKHKVDELCDDEMKLRESAVFSGNLGELERKTLKRKKVLATLKVLWSVIEDITREISPEDMKRVMQKDAARTEDVVAYNIIPLDALSTTNAIVTFPEVRAAISALQYHRDLPRLPDTISVPDARNSDMLDLLHCVFGFQKGNVSNQREHIVHLLANEQSRLGKLPGNEPKIDEGAVHVVFSKSLDNYMKWCNYLPLRPVWNNTELLTKEKKLLYVCLYYLIWGEAANVRFLPEGLCYIFHHLARELEEIMRKHTAEPAESCISNDGVSFLDQ…	40393.8	12239.5	7677.2	3708.94	16004.9	4308.81	2635.7	2420.63	5931.3	3824.11	27547.6	16525.8	39090.6	43584.6	31687.1	26568.5	26298.8	24933	23302.7	25275.8	23690	26593.2	18362.8	16881	21381.7
Bradi1g77560.1	1.91989e-05	7.23444e-05	0.0635629	0.204208	0.00136092	0.210782	0.00136092	1.22327	0.611913	1.22327	1.16666	0.611913	0.834991	MAYCLLLAAALLLLAVDGAMAAGAVHKVGGLDAWGIPPASKPDVYVRWGNSTKVSLGDALMFLYPPSQDNAVQVTAKAFAACDVAKPLAKLDDGNSIFNLTAPGRAYFTSAAPGHCRKGQKVSVDVPKADGSLVQPSADDLAALKVLETLPPAAAPSDSLPALSPVDGDEDSSDAAVTRASAAAGFVVSAAAALFFGFVL	607196	678020	883877	772554	735412	827948	965236	924925	880314	899606	746136	946237	780338	959203	857979	370642	402134	487439	539818	450008	650928	536143	672881	596295	614062
Bradi1g77770.1	0.159707	0.181503	0.484865	0.747075	0.66308	0.984142	0.484865	1.31185	0.608886	0.608886	1.27485	1.31185	1.11305	MALSGMRGLSVFISDIRNCHNKEQERLRVDKELGNIRTRFKNEKGLSPYEKKKYVWKMLYIHMLGYDVDFGHMETVSLISAPKYPEKQVGYIVTSCLLNENNDFLRMVINTVRNDIIGRNETYQCLALTMVGNIGGKEFSESLAPDVQKLLISSSCRPVVRKKAALCLLRLYRKNPDVVNIDGWSDRMAQLLDERDLGVLTSVMSLFVSLVSNNAEAYWNCLPKCVRILERMARNQDIPQEYTYYGIPSPWLQVKTMRALQYFPTIEDPSARRALFEVLQRILMGTDVVKNVNKNNASHAVLFEALALVMHLDAEKEMMSQCVALLGKFIAVREPNIRYLGLENMSRMLLVTDVQDIIKRHQAQIITSLKDPDISIRRRALDLLYGMCDVTNAKEIVEE…	42462.9	19829.5	19633.4	9978.46	22976	9453.51	15941.4	14583.1	15981.2	13989.8	29465.8	30234.1	34374.5	23089.7	29291	21928.5	20335.3	51818.2	26482.9	30141.2	26273	26915	23102.7	26002.8	25573.4
Bradi1g77840.1	0.535658	0.556705	0.493803	0.891643	0.999351	0.746129	0.493803	1.12526	0.984184	1.12526	1.06503	0.984184	1.0891	MAAEEAKKVEVETTTKDIAEEKAIVPVSAPPSSHDDSKAIVAVVKDSEATRGSSERDAYLTKIMSEKRLTLINAWEESEKARAENRAAKNLSFITSWEHAKKAEMEAELKKIEENLEKKKASYQEKLKNKLAMLHKSAEEKRAMAEAKRGEEIVMTEEMAAKYRAKGEAPTKLFGLMKA	917702	1.13822e+06	1.305e+06	1.05476e+06	1.10392e+06	1.37917e+06	1.2294e+06	1.21449e+06	1.14571e+06	1.24219e+06	986346	1.22363e+06	1.26025e+06	1.23259e+06	1.17571e+06	1.11927e+06	903010	1.07801e+06	1.24556e+06	1.08646e+06	985937	1.15875e+06	1.43304e+06	1.2314e+06	1.20228e+06
Bradi1g77940.1	0.0208676	0.0296944	0.817267	0.33554	0.189721	0.417398	0.189721	1.38315	0.531544	0.802507	1.38315	0.531544	0.653454	MEEATATAASMQEGSSRRPSTPLLEGSDDGDVEYTASEIADRFVQVIDGKAPIDSVKGAVGKFGGILDWKERRRQVEEELDKVQGEAAEYQRRSQEAEAGKAEAVQELMGATGEIDDLWLSVKRAQIAEAQARKDAELAKLRLRKTEKGARERAAARSELDAVRDRHAAALADLRSVRAELDALRQERDADAARTRAKETTGEAAEAGQAVRGAAAELAALREELDAARAAHDAAEERRMRAAMAWQEDKVQWQTELEQGEMEARRLRDELVAAGDLEAKVAAASDLLASLRAELFARAVQGASETAAPGVMGKTKEEVEEVKASLEKAKDEARILRVAAASLRADLEKEKAELAALRKNKETATASSSSPASLEEELGRVTAELAAAQATAGESETTA…	4698.12	1945.01	2039.7	5620.07	3575.73	4627.91	3280.66	1650.14	1919.46	2869.54	5675.55	3513.48	4630.23	5963.77	4945.76	1561.97	1672.32	2159.57	2208.75	1900.65	1865.26	2198.5	3256.09	2026.44	2336.57
Bradi1g78170.1	0.0120251	0.0183921	0.919628	0.984391	0.0132324	0.0523479	0.0132324	0.936041	0.439795	0.89651	0.936041	0.439795	0.557146	MAVGKNKRISKGRKGSKKKIVDPFTKKEWYDIKAPLIFSTRNVGKTLVSRTQGTKIASEGLKHRVFEVSLADLQADEDQAYRKIRLRAEDVQGKNVLTNFWGMDFTTDKLRSLVRKWQTLIEAHVDVKTTDNYMLRMFCIGFTKRRPNQVKRTCYAQSSQIRQIRRKMVEIMVNQATSCDLKELVQKFIPEVIGKEIEKATSSIFPLQSVFVRKVKILKAPKFDLGKLMEVHGDYKEDVGMKVDRPAEGDEAIIPGAEDVAAAAE	26836.1	33082.2	38140.1	56252.1	38577.6	20255.9	49150.9	32553.5	36380.6	34585.2	29103.1	45497.4	31339	38501.5	36110.2	22813	19777.5	13520.7	11753.7	16966.2	18432.7	18233.5	22683.5	26623.8	21493.4
Bradi2g00220.1	0.00180415	0.00354265	0.381857	0.492814	0.0285285	0.0483429	0.0285285	1.17473	0.656309	1.17473	0.847099	0.656309	0.687359	MEAMQRSFLVLLVISAAITASAQGPTAAPTTPAPAAPAPAAGTTKTTNITGVLAKAGQFNTFIRLLRSTGVAAQIDNQLNSSQTGGLTVFAPTDNAFTSLASGTLNSLSDSQKNSLVQFHVLSTAVPMSQFDTVSNPLRTQAGSSSPGEYPLNVTATGQQVNISTGVVNATVDNTLFTGDQLVVYQVNQVLLPMAIAGKKADAPAPAPLGPAKKTPVAADAPGGADADTDSTASRAAGGGGGGGVVAVAMALASCVLCWGL	652398	735940	926290	1.06127e+06	843974	1.04311e+06	1.23855e+06	856420	827677	991440	738812	699732	721239	699937	714930	526063	692126	469743	527701	553908	661221	690953	488564	479713	580113
Bradi2g00800.1	0.00251257	0.00472728	0.150482	0.0201383	0.00267965	0.0014168	0.0014168	0.710094	0.37719	0.710094	0.564029	0.4244	0.37719	MAPKKEKAPPLSSKPTKSDGGKQKKKKWSKGKQKEKVNNAVLFDQATYDKLLTEVPKYKQITPSVLSERLRINGSLARRAIKDLMERGLVRMVSIHSSQQIFTRATNT	64815.5	116321	67436.8	54572.2	75786.5	34256.4	54196.3	59916.7	66892.7	53815.5	40283	49788.6	33847.6	47063.9	42745.8	28041.2	40820.6	26198.6	33594.7	32163.8	24135.5	28908.6	27335.1	33964.4	28585.9
Bradi2g01430.1	1.15392e-06	8.69632e-06	0.036454	7.78465e-05	1.67137e-07	6.23414e-06	1.67137e-07	0.807987	0.391297	0.807987	0.5978	0.391297	0.513709	MTTAWRALLLLVVSAVLVQIRASEPLLYEPFDESFEGRWVVSGKDEYKGVWKHAKSDGHEDYGLLVSEKAKKYAIIKELDFPVTLKDETVVLQFEVRLQNGLECGGSYLKYIRLQDSTWDAKEFDNETPYSIMFGPDKCGSTNKVHFILKHKNPKTGKYVEHHLKFPPSVPYDKLSHVYTAILKPDNEVRILIDGEEKKKANFLSADDFEPALIPPKTIPDPDDKKPEDWDERAKIPDPDAVKPEDWDEDAPMEIVDEEATKPEGWLDDEPEEIDDPEAAKPEDWDDEEDGEWEAPKIDNPKCEEAPGCGEWTKPMKQNPAYKGKWHAPLIDNPNYKGVWKPQEIPNPDYFELDKPEFDPIGAIGIEIWTMQDGILFDNILIADDEKVANSILEKTWKP…	426630	460505	466214	341234	423646	303501	312306	359075	394320	342301	240065	228506	235543	308908	253256	163459	170188	175231	154208	165771	249929	173551	244278	202765	217631
Bradi2g02000.1	1.10109e-05	4.64176e-05	0.0295064	6.29731e-05	7.83092e-06	1.32618e-05	7.83092e-06	0.630747	0.132205	0.630747	0.245538	0.132205	0.153405	MAMDDVSAASLDAFAASSSSSAPASADPSHGWQKVTYPKRHRKPQPAPSTAPAGADLANGGRPGVFEGVDKRAQDRHRAIQAARDAAADADGPIAAWARSDDSDDDSDEAAARSSAQPAEEKKPKKPKVKKPKVTVLDAARLIDAENLEAHLVDISASYENQEGIQLMRFADYFGRAFASVSAAQFPWAKMFKESPVDKMVDIPLCHIPEPVCKTASDWINRKSPEALGEFVLWCIDSIMSELSGQAVGPKNSKKVVQQTPKAQVAIFVVLALTLRRKPEVLINLSPKIVGNSKNLVPEKLPIVAWVIAQASQGDLVSGMFCWAHSLFPTICGKSSVNPQSRDIVLQLLERFYSPIKAQAILLNGAIRKGERLIPPSAFDLFMRCAFPLSNARVKATER…	5725.17	11438.8	8366.78	9373.94	8726.18	2451.47	5751.63	7036.38	6776.57	5504.01	2015.63	2167.25	1956.79	2430.78	2142.61	1235.91	471.324	2285.4	621.95	1153.65	1390.36	1159.69	368.628	2435.89	1338.64
Bradi2g02420.1	0.00338759	0.00612581	0.706211	0.999402	0.00722181	0.0123899	0.00722181	2.20234	1.05385	1.32993	1.05385	2.20234	2.11467	MAVMRQRARAAKSLWLLVRRLLCRKRQRPEQLEEGEKSSLLLLGRSSSLEELLGSDGVCRCASTPCCCGGAKKKDGQQARQRVDVARPEAEAEAMATTTALSAGGGGGAAGQYRRFMFGGFRRRLMARRQWRPMLVAIPE	1513.4	1542.39	800.541	1025.06	1220.35	1847.2	1335.67	2124.3	1184.74	1622.98	1387.27	1136.19	1649.4	971.37	1286.06	1560.45	3027.85	3132.03	3030.13	2687.62	2938.96	3362.79	1573.3	2447.49	2580.63
Bradi2g02822.1	2.10442e-05	7.8639e-05	0.999951	0.996773	0.000165154	0.000547639	0.000165154	1.88068	0.986068	0.986068	1.04045	1.88068	1.80244	MGEVAAAEMYTQDGTVDLKGNPALKENTGNWRACPYILANECCERLAYYGMSTNLVNFMKDRLGMENALAANSVTNWSGTCYITPLIGAFLADAYLGRFWTIASFMIIYILGLGLLTMATSVHGLVPTCTGGTCSPTSGQTAAVFVALYLIALGTGGIKPCVSSFGADQFDEHDALERRSKSSFFNWFYFSINIGALVASSVLVYVQTHVGWSWGFGIPAVVMAIAVGSFFVGTPLYRHQRPGGSPLTRVAQVLVAAARKWSLPLPEDPSALHETADKESGIEGSRKLEHTPQFAFLDRAAIETDSDKKSASSSPAPASSSWRLCTVTQVEELKSVVRLLPIWASGIVFATVYGQMGTLFVLQGNTLDASMGPHFKIPSASLSIFDTLSVIAWVPVYDK…	67969.6	38296.6	44318.2	55782.5	51591.7	57721.5	55942.3	47058.4	42769.6	50873	55253.1	59138.7	51263.2	49059.9	53678.7	90360.9	89353.5	110385	98009.4	97027.2	117295	87087.2	74002.8	93578.3	92990.7
Bradi2g03170.1	0.00991221	0.0154585	0.454077	0.00785223	0.74208	0.995122	0.00785223	1.01976	0.745951	0.902512	0.745951	0.933454	1.01976	MGRKFFVGGNWKCNGTTDQVDKIVKVLNEGQIASTDVVEVVVSPPYVFLPIVKSQLRPEIQVAAQNCWVKKGGAFTGEVSAEMLANLGIPWVILGHSERRSLLGESSEFVGEKVAYALAQGLKVIACVGETLEQREAGQTMDVVAEQTKAIAAKITDWTNVVVAYEPVWAIGTGKVATPAQAQEVHANLREWLKTNVSPEVAESTRIIYGGSVTGASCRELAAQPDVDGFLVGGASLKPEFIDIINSATVKSA	1.15013e+06	1.25765e+06	1.24637e+06	1.13585e+06	1.1975e+06	956070	1.0186e+06	1.19142e+06	1.15694e+06	1.08076e+06	928888	866126	803798	974291	893276	1.00304e+06	1.37978e+06	1.05223e+06	1.03619e+06	1.11781e+06	1.04811e+06	1.20614e+06	1.3131e+06	1.31728e+06	1.22116e+06
Bradi2g03190.1	7.43413e-05	0.000224857	0.999586	0.0288305	0.000150207	0.00128182	0.000150207	0.989993	0.615695	0.989993	0.800702	0.615695	0.697863	MGTILDALASMFLAKLGQLIEDEVVMTLSVKRDIKRLKNNLEHFSAVREDAEALALEDRQIEAWWRNMSDVMFDVDVIIDLVMVQSQKLLLPPRSVCCNRFMTSCFGKLSFDHRVARKIRDINERLDEIKTNTEMFSLDRTSRQQFQVTTVDRNQTSPIDELEVVGREIKQSVDDMVQMIVSSCHENRSNVLVFKGWEALWVAEGFVRKEHEYSIHETAEEYYLELVRRNLLQPIPESVDKGVSTMHDVLRSLGQYLTKEHSQFMNAESNHSLLNLRRLGISHVVEEIPTLEEHKCLRSLLLFNNKNFKSVHKDTFRKLEHIRVLVLSGTSIQNIPESVGNLVLLRLLDLSFTEINKLPESTGSLISLEYLSLRGCCWGTRYATLAQNNNFYRFCPDQC…	22855.3	29304.7	26627.9	25248.6	26009.1	23036.6	24344.6	26898.5	28715.6	25748.8	23402.1	22532.3	19326.2	18041.6	20825.5	14804.8	16317.7	19589.9	13342.5	16013.7	19015.6	19813.4	16602.6	17171.6	18150.8
Bradi2g03290.1	3.07397e-10	2.07339e-08	0.997806	1	0.00299857	3.9746e-14	3.9746e-14	18.4879	0.734757	0.734757	0.973687	5.76962	18.4879	MAQLLHHQDSAFYGKEIPGRRWSIFQFFGLSRRLRSVKMLSEKKHGQDKSPGGSKRRSYVTLKDEDSGVMDDSKNAEVKGKQKGSKKNSGKSSLKSLIAKKLYGKEGEKEKMLPVAPKLLRTLSMHYLERNEYVLDGEAATNGNGSSHGAKMLLQQALSNTLEGSDTDKSSSLLLNRGDEHAKQKSHRSISMDGILHKVPYGHKVSGNKIGEELPRSASVTYDRDGLKPYIGRASKRHVNQGFQRSRSLSESLESYSLLLDSISSSEAKRVLTSSKSTRDHSLDGPGANAFHRTSSSQFRSKGLTTLAEHLVMKVDASESHVADKTVGDGDVNFAVDESSCNQFSDGSKNPVLLEEYLHDKSFHVEVSTEADLCIAPLPSEEHAATCDDDQAPSSTKEV…	237.143	1051.94	1054.16	1708.46	1012.92	930.31	571.602	581.665	893.439	744.254	1111.8	1080.36	1010.09	742.833	986.272	6668.85	3666.06	5531.13	7510.72	5844.19	14675.9	18018.9	22252.9	19959.7	18726.8
Bradi2g03297.1	3.76476e-05	0.000128731	0.0474917	0.00406998	1.96372e-05	3.70505e-05	1.96372e-05	0.700853	0.286124	0.700853	0.567842	0.286124	0.295262	MKVSVVSRSGREVVRGGIDLPDSAKVADLQEAIHAKTKKYYPARQRLTLPLQPGKSGKPVVLSPKSSLSEYCEKGSGSLKVVFKDLGPQVYYSTLFFWEYVGPLIIYPIFYYLPVYKYFGYEGERVIHPVQTYAMYYFCFHYFKRIMETFFVHRFSHATSPVSNVFRNCAYYWTFGAYIAYYCNHPLYTPVSDLQMKIGFGFGIVCQIANFYCHILLRNLRSPTGSGGYQIPRGFLFNIVTCANYTTEIYQWLGFNIATQTVAGYVFLAVAAAIMTNWALGKHSRLRKLFDGKDGRPKYPRRWVILPPFL	85204	101795	83945.2	50795.6	80435	43021.9	46517.4	63460.7	72492.6	56373.1	40339.6	40921.3	44277.4	57159.1	45674.4	19698.1	20399	25249	26711.6	23014.4	33053.5	20453	20779.8	20711.2	23749.4
Bradi2g03400.2	0.00550645	0.00935542	0.905643	0.85991	0.185511	0.0739368	0.0739368	1.59264	0.529358	1.15635	0.821238	0.529358	1.59264	MGILSLITGKLGASGFGSGSTAEQVTDGVDATRLTVIVTGGSSGIGLETSRVFALRGAHVIIAARNTEAASEARKRITEANPTARVDVLKLDLSSLKSVKAFAEQFNSMNLPLNILINNAGVMFCPFQLSEDEVEMQFATNHLGHFLLTNLLLDNMKATAKSTGIEGRIVNLSSVAHLHTYPKGIQFDELNDKKIYNDKLAYGQSKLANILHAKELSRRLKEEGANITVNCVHPGLIMTNLMRHSFALMKAIRVVTYMLWKNVPQGAATTCYVGMSPQLAGVSGKYFADCNEEKTSKMARSDALAKQLWEFSEELIRSAK	1748.6	1915.93	2499.15	4135.67	2574.84	3486.94	2603.03	3228.83	2590.86	2977.42	1790.52	2628.5	1727.94	2311.26	2114.56	1621.69	1072.67	1404.75	1352.94	1363.01	5509.18	2415.38	3447.91	5030.75	4100.8
Bradi2g03460.1	0.000717516	0.00158417	0.657314	0.229689	0.000593394	0.00279843	0.000593394	0.922434	0.644236	0.922434	0.866757	0.644236	0.702557	MAEYPHRHGHGHGRRGGGDDDSDDRRRHAPAYGHQDPYDAAPPSYGRPAADPYDAPPPSYGRPPADPYGRAPPAYGGGRDDDDGGYGRRAPPPSYGREDDGGYGGRAPPPAYGHGGRDDDGGYGGGRAPAPAYGNVVHVSHESGEEDRPHYGGGSGYGHETRPHHGGGGGGGAAPVRQQTFRIVCKAGEAGFSLAARDGKVCLVRTDRDDDAQHWIKDMKYSTRVKDEEGYPAIALVNKATGEALKHSLGQSHPVRLASYNPEYMDESVLWTESRDVGEGYRCIRMVNNIYLNFDALHGDKDHGGVRDGTTLVLWEWCEGDNQRWKIVAWCKFFCLSPGLALYIYLLSHQFSFMSASSLS	298930	353671	359032	281736	323342	346522	298244	258886	289396	298262	250121	275016	261109	334792	280259	214268	232982	201280	184705	208309	233295	190918	249137	235316	227167
Bradi2g03560.1	0.00173907	0.00343988	0.98724	0.624194	0.00127504	0.0292891	0.00127504	0.969996	0.63044	0.969996	0.907359	0.63044	0.755512	MEPPSSPNNPNHKEIKSPPPVPSPAPPPPPNPSLHRKKLSFHFMDSDDRRYPPPGPGSTTPLNIRGSPIPAADLPKTGGWTAAFFIFGNEAAERMAYYGLSVNMVVFLFKVMHLPFAASANAVNAFLGISQASSVLGGFLADAYLGRYWAIALFATLYLLGLAALTLCATLPALVPAQDGCDKLLLLLGGCAKASPWQTGCLYAALYVTAFGAAGIRPCVSSFGADQFDDRDGNYKRRLDRFFNVFYLAVTVGAIAAFTVVVYIQMNHGWAAAFGTLALAMGASNALFFAGTPLYRHKAPGGSPLTRVAQVLVAAFRNRNADVTETGFVGLYEVAGPKSAIRGSGKLEHTDRMAWLDKAALMTPEAAGGDAPDPWRVCTVTQVEEVKILLRLVPVPACT…	12432.6	14485.1	16900.5	13279.5	14274.5	14693.8	14009.6	14703.6	11977.6	13846.2	12774.2	13359.8	12753.1	12921.1	12952.1	7342.2	6746.96	11307.3	10600.2	8999.18	12255.1	11619.1	10790.5	8473.48	10784.5
Bradi2g03687.1	9.29206e-05	0.0002725	0.0540642	0.000124873	0.000140865	0.000766565	0.000124873	0.813736	0.57858	0.813736	0.57858	0.597858	0.665673	MAARSALLFALLVAALSFTATAAGDAPFIVAHKKVALSRPKPGVERLAVSLDLYNQGSATAYDVAITDDSWPKEAFELVSGEVSKTLERLDPGATASHVFVLETKAQGRFQGSPAVIKYRVPTKAVLQEAFSTPILALDILAERPPVKKFEWAKKLVAKYGALVSVVSFVAAFIYLVASPSKSGGAKAGKKRR	34988.5	41742.7	42269.5	32478.6	37869.8	25033.5	32891.8	29479.3	35859.5	30816	20920.6	22716.2	18766	25240.2	21910.7	27712.8	20358	19770.1	22722.3	22640.8	23513.3	24400.2	27336	25586.2	25208.9
Bradi2g03760.1	9.35492e-06	4.12412e-05	0.17407	0.000262041	5.38847e-06	5.69247e-05	5.38847e-06	0.861512	0.501613	0.861512	0.640571	0.501613	0.563988	MSTVVEPALQHEVKLYNRWSYDGVAVNDISLNDYLAVTLPKHFTYLPHSAGRYSAKRFRKAQCPIIERLTNSLMMHGRNNGKKIMAVRIIKHTMEIIHLLTDANPIQVIVDAIINSGPREDATRIGSAGVVRRQAVDISPLRRVNQAIYLLTTGARESAFRNVKTIAECLADELINAAKGSSNSYAIKKKDEIERVAKANR	585214	721245	661072	619670	646800	454298	586190	593765	594652	557226	394654	501366	361472	399794	414321	247633	422061	290830	337250	324443	306267	412637	372852	367393	364787
Bradi2g04020.1	0.0415813	0.0549955	0.999873	0.0403976	0.221297	0.142067	0.0403976	0.96598	0.138153	0.96598	0.138153	0.424759	0.344873	MARRSTDPKLLCTLLILLLCVVQQARGHGGIDHGDGGDEDSGTTTAPAAALRSSKGLVAVKSYCLVILLVFTFAGGVSPYFCRWNETFLLLGTQFAAGIFLGTALMHFLAGSSSTFHGLTENHYPFSYMLACAGFMFTMLADCAVAAAAAVAIARRRQNQRAVVNEEEELGHGGRRLKGEEEEGGAGNGAAAAAASPAPAADADGDAHQLQQHPVQLVAAAASFEDAVLLIVALCFHSVFEGIAIGVSATKDEAWRNLWTIGLHKIFAAVAMGIALLRMIPKRPFLMTVLYSLAFAVSSPIGVGIGIAIDATTEGLAADWTYAISMGIATGVFVYVAVNHLMAKGYRPQQPNYFDKPIFKFLSALLGIAVMAIVMIWD	25803.3	13158	11305.8	8866.6	14783.4	3225.3	5095.84	25592	23208.9	14280.5	2297.92	1512.93	3000.25	1358.41	2042.38	4035.63	4853.29	7794.21	8434.47	6279.4	5661.47	3441.42	6111.39	5179.36	5098.41
Bradi2g04070.1	6.09222e-10	3.38445e-08	2.5144e-05	0	3.85675e-07	7.92127e-08	0	7.49208	3.38539	3.38539	7.49208	3.99921	4.3132	MGNSIYRFLCGVCSDLCSAASESAYQPHGAHAAVAALGRDILHFQRTKQVPEGLSRHVVSSQNAQANWYKKLQVAWKKARPAPTTPEDAARLVVLTLKNHQKADVEGLLAFYGLPHPNAASAAPPPPSSAAPAPAHHAGPAHKPPGVKFELHTLPVDAKAVADGDTITVYVDTSGEPGSVPGDIKKAAAERTKLRAARNYPKADALQKTMADAGYRQVPNAKGQEVLAKKYRIRLSGIDAPESAMPYGKEAKEALLKMVEGKPLTVHVYDTDRYGRSVGDIHCNGVFVQEQMLKKGFAWHYTAYDKRPELAKWQKQAQDGRKGLWASSRPQEPWEYRKAKRNGTA	82479.6	78491.9	111256	86237.2	89616.2	304867	339044	277324	292310	303386	636019	804471	613295	631862	671412	353073	354163	334902	391439	358394	423518	344838	412119	365655	386533
Bradi2g04080.1	0.0240365	0.0335664	0.0158339	0.158292	0.0308788	0.0184227	0.0158339	0.646039	0.439238	0.439238	0.646039	0.497817	0.452692	MYAAQSHRCRRARERGIHAHGGVARKRTSLSPPQVLLCFIGAAVLLANARHALFAKVDAKAVADGDTMTVHVDTADPREFGNVPPEVQEAVAERTKARAAKDYQKADALQKILVDAGYRQVPNSRGEQVLAKKYWIRLRGIDAPENSMPYGKEAKEELVKLVQGKALKISIYDKDRYDRLVGDVECNGIFVQEHMLKRGLTWHYTAYDRRLELATISRVFDLRLAADDPWCYCRAIHDSVLMPAWIVFWRADTMKKHQAQGISAGGVYRYTHRREGGADIHDVFVEKSASRLLFSYIGAMLLLANVCYALLKQESLCLSSFWCVPFSAIVAKSLQYKPVKKESLMIMPGFGVQLEQHFWSGRVHRQFVPIGKILKPVLNECVTPVTCYWSLALLVRNED…	48438.9	30597.1	21741.8	13922.6	28675.1	12107.6	12457.9	11278.3	14536.9	12595.2	21513.8	14412.9	17366.8	20807.4	18525.2	14696.8	15294.5	14394.5	12714	14275	13894.8	11633.4	13214.7	13181.2	12981
Bradi2g04230.1	0.262301	0.286513	0.671916	0.649484	0.988855	0.125431	0.125431	1.31941	1.05099	1.15295	1.1578	1.05099	1.31941	MGLGVVSLLNAVFRRAFTSAGLRPGSAAVDADTSLHFWAHPSLLLPPPSSSGEQNGDTGDRRRRPVVVLIHGFGPDATWQWASQVGPLSRHFDLVVPTLLFFGAGSTTKSPDRSDAFQAAAVAKLLTAHLGLDLMIDGSQQVVHVVGTSYGGLVAYHLAQALAIAAGTSGLMGNESNKVVICSADLAKGEEDDVALAAKGGVGDVTELMVPADTKALRRLMAICAHGPPKYIPECLARDLLRKYFSVQREEKIQLIKGIASGHGFQISPLPQEVLIVWGEFDQIFPVEKAHKVKEKLGEKARVEVIPSTGHLPHQENAKLFNKILLSFLLPPPSPAAAAATK	264662	250659	357057	390986	315841	357798	420205	349673	328917	364148	367707	368939	329254	396818	365680	281124	452895	307876	285882	331944	333308	458242	511277	364065	416723
Bradi2g04380.1	0.0153071	0.0227666	0.999855	0.999713	0.0173562	0.999742	0.0173562	5.389	0.820173	0.844672	1.18474	5.389	0.820173	MGGRNIGVAVDFSSCSKAALRWASTNIIRNGDQLILIHVNNSYQNEQGAVHLWEQSGSPLIPLVEFSDPHVTKTYGLSPDKETLEILAHVANQRGVEVFGKIFYGDPTKKLCEAVDVVPLSCLVIGSRGLSTLKRALMGSVSTYVVNHATCPVTVVKENA	6264.75	11407.3	11576.6	20382.2	12407.7	19295.7	9363.45	5777.44	7485.15	10480.4	15184.1	26708.6	7902.48	9004.49	14699.9	102324	117849	34674.5	12613.1	66865.1	6000.06	11287.5	15500.3	7918.05	10176.5
Bradi2g04480.1	0.0146503	0.0220458	0.099555	0.00702946	0.00992474	0.126306	0.00702946	0.811351	0.684069	0.800049	0.684069	0.699702	0.811351	MAQILLHGNLHVTIFEASSLSNPRASGGAPKFLRKFVEGIEDTVGVGKGASKLYATIDLEKARVGRTRMLSNEPVNPRWYESFHIYCAHLAADVIFTVKADNAIGATLIGRAYLPVQELLDGEEIDRWLEVRDDNREPVGESKIHVKLQYFDISKDRNWSRGVRSSKYPGVPYTFFSQRQGCKVTLYQDAHVPDNFIPKIPLADGKSYEPGRCWEDIFDAISNAQHLIYITGWSVHTEITLIRDTNRPKPGGDVTLGELLKRKASEGVRVLMLVWDDRTSVGLLKRDGLMATHDEETANYFQGTDVHCVLCPRNPDDSGSIVQDLQISTMFTHHQKIVVVDHEMPNQGSQQRRILSFVGGIDLCDGRYDTQYHSLFRTLDTVHHDDFHQPNFGTASITK…	610708	679468	642327	426247	589688	472660	407164	444511	562781	471779	400384	321261	415918	475987	403387	442216	362438	429354	416413	412606	526796	462016	511619	413343	478444
Bradi2g05242.1	0.000975347	0.00204945	0.999997	0.00620026	0.104866	0.564295	0.00620026	1.10071	0.689861	1.00344	0.689861	0.809318	1.10071	MLAEVNLAEDGVLQLLLASVYRLLCRTGSDHEAAVSSKLMILAVRFATKTIKGYGLRSQRKVMPDNSLKLHEMAFLLGVIRSIQSRITAKNQTSIRMGDDKNSLKIGKEVSQNDSSLPIVVVDGVSSGLSGDLDAHGRQGSASTVFEFLPGIDRQLVLSPVESSLSASQFHNNDTDQGSAQVGRPITQGNIKDMMNRWEMNKLDLKTVVKEALQSGRLPLAVLQLQLLRQRESCSNDDSEDAFSEVREIGRSIVYDLFMKGESELAVATLERLGDDIESDLRQLMQGTVRRSLRLQIAEEMKQRGYMRSNEWKMLETLALIERFYPSSSFWDTYLGRENVIPDGANIVTLPGEDKPALALHICNHPAIECGDVDGVVLGSWVNINDYTDLKEFSQSNLS…	55737.3	55859.7	55178	49098.1	53968.3	49746.9	52473.3	52981	61414.4	54153.9	45280.6	29431.1	35894.2	38316.6	37230.6	44998	38325.2	50935.8	40451.1	43677.5	48535.9	55232.8	65057.3	68788.7	59403.7
Bradi2g05480.1	4.27368e-06	2.26976e-05	0.00153609	2.69566e-08	0.000143079	0.000132	2.69566e-08	0.674053	0.352981	0.674053	0.352981	0.570283	0.578211	MASPSSFKVTRISEGPVKPASPDTPGHTLPLAWVDRYPTHRGLVESMHIFRSGADAAPGVIRDALAKALVFFYPLAGRIVEPEKEAAAAAAAAAAGENGDGEKKAPAASFPLGVRCAGDGVYFAEAEAECSLEDVRFLERPLLLPKEDLVPYPGPDKWSVEPHNTIMMMQITKFTCGGFVMGLRFNHASADGMGAAQFIKAVGDMARGLPEPAVKPVWDREKFPNPSIKPGPLPELPVLALDYIVLDFPTGYIDGLKAQYKAHSGKFCSGFDVLTAKLWQCRTRALNLEPGATVKLCFFASVRHLLKLDPGYYGNSIFPVKMSAPSEKVLGSSVMEVIDMIREAKQRMAVEFFQFAKEETKQDPFQMSFDYESIYVSDWSKLGFSDVDYGFGPPMFAGP…	259735	244772	271040	224839	250097	126530	141104	188396	218284	168578	80567.8	94023.9	81272.5	97253.3	88279.4	162104	128118	148474	131808	142626	130541	115261	170431	162202	144609
Bradi2g05620.1	0.00327403	0.00595239	0.035318	0.00458574	0.0041573	0.00174845	0.00174845	0.592336	0.385162	0.592336	0.44936	0.438486	0.385162	MLSARTAAASPAASLWKRAGGEGGSGNGNGNNGCTSCREVRRRAAVVTVRATPPRRVEAVAMESAAAEIAEAEAEAVAMESAVAEAETAEEEAEKEVAAAGGGVEDKYGEDRATEELPVTPWAFSVASGYTLLRDPHHNKGLAFTEKERDAHYLRGLLPPGVVSQDLQVKKIMHNLRQYKVPLQRYVAMMDLQERNERLFYKLLIDNVEELLPVVYTPTVGEACQKYGSIFRRPQGLYVSLRDKGKVLEVLRNWPERNIQVIVVTDGERILGLGDLGCQGMGIPVGKLSLYTALGGVRPSACLPITIDVGTNNEQLLNDEFYIGLRQRRATGEEYHELMEEFMGAVKQIYGEKVLIQFEDFANHNAFDLLAKYSQSHLVFNDDIQGTASVVLAGLLSSL…	11916	15682.9	10004.3	5082.17	10671.3	7289.71	3994.19	6573.49	7426.64	6321.01	4679.08	4225.86	5460.48	4815.62	4795.26	4953.4	4605.55	4614.22	4543.73	4679.23	4485.82	3832.96	4011.31	4110.67	4110.19
Bradi2g05640.1	0.000118214	0.000327455	0.503815	2.67748e-05	0.129076	0.357803	2.67748e-05	0.879698	0.405395	0.879698	0.405395	0.799137	0.856507	MAGSSSFFQDARLPQQRAVEGVAFPAVLVPSFRGGPGGLGGLEEFLAAVRSERASRVEPLARAAGAVLLRGFPVRTAAEFDRAVEAFGYEELPYVGGAAPRSNVVGRVFTANESPPDQKIPFHHEMAQVPTFPSKLFFFCEVEPKSGGETPIVLSHYVYKRMKDRFPEFVEKLEKDGLIYTRVLGEGDDPSSPIGRGWHSTFLTKDKAVAEERALKLGMKLEWTGDGVKTVMGPIPAVKWDEARGRKIWFNSMVAAYTGWKDARNDPVKAVTFGDGSPLPADVIGECGKILEEECVAIPWQQGDILLIDNWAVLHSRRSFEPPRRVLASLCK	166768	160982	135376	115428	144638	161732	126260	113717	107244	127238	47578.9	58124	52907.5	75932.6	58635.8	115230	134339	122049	90725.9	115586	117739	114795	130391	132609	123884
Bradi2g05680.1	0.0486207	0.0633101	0.744044	0.983106	0.0375471	0.998313	0.0375471	1.83267	0.937437	1.27703	1.11539	1.83267	0.937437	MGKAARWLRNLLGGGGKKEQGREREQRRPATTNNAAAPSGDRKRWSFCKSSSRDTSEPEVTAAAQVGANNGVAAIARAAEAAWLRSLYKETEREQSKHAIAVAAATAVAADAAVAAAQAAVEVVRLTSQGPLVAATSPRAFAGAGGDGRAAAAVRIQTAFRGYLAKKALRALKALVKLQALVRGYLVRKQAAATLQSMQALVRAQAAIRAAARNRAADLRLHLHPLTVRPPRYSLQEDTRSEHGSGVAPYYYSRRLSASVESSSYGYDRSPKIVEMDTARPKSRSSSLPVAEPGGGDDYGYYSVSSPLMPCGHGLPCAPPRIAAPSRGFFLPEYYEREKPRPATAQSTPRYASSLYYTPVTPAKSVCGVGGYSNNSPSTLLSGPRSYMSSTQSSDAKTR…	96222	71075.2	78075.3	76122.2	80373.7	112510	88036.7	117567	92443.8	102639	104507	111648	70643.5	71792.2	89647.7	183684	224509	85630.9	95369.2	147298	80619.2	75275.4	68765.7	76720.7	75345.2
Bradi2g05777.1	1.25669e-05	5.1685e-05	0.990875	0.999113	0.787513	1.15349e-05	1.15349e-05	2.76681	0.911925	0.911925	0.952068	1.23202	2.76681	MEEPPRDNAHSKNGPEPELEPMILDDNEESRSHTMDDSNGQSSMDIDIEGSSMGEQIPADMNLTSLEKFCKEASRSFFEEIGLISHQINSYNEFVSHGLQELFDSLGEVTVEPGYDPSKKGPGGWRHAIIKFGKVKLEEPVFWSGKIGIDEESLKLKPRHARLQNMTYSSKMEVEVNIQVYSMEKSDKAKTGNDHFGHKRDIINETHWVTIGRLPVMVNSDLCWLHKLGESDCLFDSGGYFLIKGMEKIFIAQEQRCLTRIWVADRPCWNVSYLSEMKRRRVYIKLIDSTTNNDLNGAKIISISFLYANMPIWLLFFALGVSSDKEVFDMIDMKDCDASVINAISATIRESDELCEGFRQSDKARKYVDDLVKSSKFPPAEPFTDYVAKYLFPGISGNR…	26534.5	33648	35600.6	26843	30656.5	24967.6	27963.4	24804	34090.8	27956.5	29237.2	33375.5	27631	26504.7	29187.1	44757.1	32101.9	31373.3	42844.9	37769.3	56352.4	77741	110917	94272.7	84820.8
Bradi2g05927.1	0.377389	0.401497	0.770436	0.490663	0.999758	0.283828	0.283828	0.986235	0.818741	0.904444	0.859506	0.986235	0.818741	MSSNGKPNPQPPAAASNGAATGGPPKMYQRPIYRPQGPSSKGRRGGRGRSCPFSCCCCFFWTILVVLLLAFAAAVAGGAFYLLYRPHRPAFTLSLARVNKLALSNSSAAPALTDSIDFTLTARNPNKKLVFLYDDFAVSAATAANAVPLGDAAVPGFAHEAGNITVIKATVAASALGVDPAAASSDIKKSGSFAITLDLETKAGVKVGGLRTKKIGIQVHCDGIKVAAPATAPAPAAKKKGVVKLTVSKAPAPAAAAGVVEAPEPSAGADDAATGTPATATAMAPRVCQVRIRVKIWRWTF	232929	229167	323554	313383	274758	260456	298738	216639	218180	248503	238705	278405	201656	225860	236156	325660	264175	274979	219090	270976	260308	194197	248591	196726	224956
Bradi2g06250.1	1.56033e-06	1.06848e-05	0.000860458	2.17804e-05	5.66672e-08	2.84297e-06	5.66672e-08	0.572774	0.182306	0.572774	0.356737	0.182306	0.317649	MKRNPRVTSSRRKCRKAHFTAPSSVRRVLMSAALSSELRHKYNVRSIPIRKDDEVQVVRGTFKGREGKVVQVYRRRWVIHVERITREKVNGSTVNVGIHPSKVVVTKLKLDKDRKALLDRKARGRAADKAKGKFTADDVAAAAGGAAATGASLQEID	7733.22	7312.33	7943.65	6432.08	7355.32	1934.1	4512.81	5713.24	4691.61	4212.94	2651.02	2744.86	2079.36	3020.4	2623.91	1711.86	1307.28	947.742	1396.79	1340.92	3011.02	812.181	2626.65	2895.77	2336.41
Bradi2g06467.1	9.04778e-06	4.01495e-05	0.00341637	8.04623e-06	3.83508e-05	0.000169604	8.04623e-06	0.78666	0.581149	0.78666	0.581149	0.666658	0.668524	MSTEKKQLNPMREIKVQKLVLNISVGESGDRLTRASKVLEQLSGQSPVFSKARYTVRSFGIRRNEKIACYVTVRGEKAMQLLESGLKVKEYELLRRNFSDTGCFGFGIQEHIDLGMKYDPSTGIYGMDFYVVLERAGYRVSRRRRCKARVGIHQRVTKEDAMKWFQVKYEGVILNKSHAS	136282	158456	159926	142917	149395	94861.8	121721	126349	127161	117523	91188.3	87462.5	77944	90688.6	86820.8	99088.9	117734	92111.1	89448.7	99595.6	109544	95724	97252.9	96976	99874.3
Bradi2g06830.1	0.0018279	0.00357886	0.444389	0.991984	0.0731534	0.0193468	0.0193468	1.18908	0.572178	1.18908	0.956763	0.664603	0.572178	MAIRRQRRPFPLLPLLISLLAAAAYGRLISDGSPASTASSSILIASPVSSSDVIRLNTSSPAAAEAEQCEQSYGFLPCTTTVFGNLFLVLTYGFLMFKAATFLSAGSELLLEIMGPGLVGGLLLPILGALPDALLVLVSGLSGTKETAQSQVLIGMGLLAGSTVFLLTLLWGTCVVVGKCDVGPNNVAIDSTDTKGFSLTGAGISTDVQTSYAARIMAISVIPFVIAQFPKMLKTHHGERLAILLALIASFSLVLAYCLYQVFQPWIQKRKLAYAKHKHVISGILKHAQMQALGRLLNDDGTPNENVIRKLFYKIDMDESHNLSRSELHALIIGINFEEIDFDKDDAVDKIMDDFDTSGNDTVEEAEFIAGMKKWLNEAKRNVPASGAFSNKFVNDYHA…	95012.7	168878	206436	159299	157406	158876	161680	186700	241419	187169	136808	151100	143977	170517	150601	123565	106630	79758.7	108497	104613	77181	99414.8	106206	77456.1	90064.4
Bradi2g07330.1	0.148539	0.170972	0.925603	0.999803	0.314076	0.781062	0.314076	1.0962	0.821176	1.066	0.986602	0.821176	1.0962	MPPRLLRLAALLLLCATLAAPEPDADRAALLDFLAGVGGGRAARLNWSSSTARVCGGWRGVTCSADGSRVVALRLPGLGLSGPVPRGTLGRLTALQVLSLRANSLSGAFPDELLGLPDLTGLHLQLNAFSGTVPPGLARLRSLQVLDLSFNDFNGTLPGELSNLTQLAALNLSNNSLSGRVPDLGLPQLQFLNLSFNRFDGPVPKSLLRFAEAAFAGNSMTRSAPVSPAEAPPSLSPPAAGAPSKKRPRLSEAVILAIVVGGCVMLFAVVAVLLIAFCNRRDSEEGSRVVSGKGGEKKGRESPESKAVTGKAGDGNRLVFFEGPSLAFDLEDLLHASAEVLGKGAFGTAYRALLEDATTVVVKRLKEVSAGRREFEQQMELIGRIRHDNVAELRAYYYS…	28551.5	27219.8	31195.4	37199	31041.4	35437.3	37794.2	28409.6	30719.5	33090.1	26303.5	30856.6	30793.4	34548.6	30625.5	22009.3	17762.4	32124.6	30065.6	25490.5	30706.8	30966	38987.4	35450.5	34027.7
Bradi2g07560.1	0.0462951	0.0606332	0.725395	0.13804	0.99989	0.857557	0.13804	1.53451	0.757573	0.757573	1.53451	0.973445	0.811915	MTTPVVVGIAVGGLIALLLASLLCFCLLKKKRRHHPHHPPPPPPHHLHYYGHPPPPPPPPPVFKEKSLALHVVSLLSGVNLIGMAIILRELLTSFLHNSCSAAGDQYGGGYQNWQHNAPPPPPDHVVKMHPNPSPKPTPPPLNVNSSGSASNYSGGGENRPLQSPLANALSFSRSTFTYEELAAATDGFSDANLLGQGGFGFVHKGVLNGTEVAIKQLRDGSGQGEREFQAEVEIISRVHHKHLVTLVGYCISEDKRLLVYEFVPNNTMEFHLHGRRGPTMDWPARLRIALGSAKGLAYLHEDCHPKIIHRDIKASNILLDFRFEAKVADFGLAKLTSDNNTHVSTRVMGTFGYLAPEYASSGKLTEKSDVFSFGVMLLELITGRRPVSSKQAHMDDSL…	34229.6	19589.4	23278.6	13256.3	22588.5	27258.2	20815.4	6363.2	14012.9	17112.4	29727.2	30848.1	32543.4	45530.3	34662.2	28818.6	14445.7	26725.7	17964.6	21988.7	16075.9	14767.1	28788	13728.7	18339.9
Bradi2g07570.1	0.0314039	0.0428351	0.259915	0.982054	0.304628	0.62763	0.259915	1.28994	0.726701	1.28994	0.934389	0.726701	0.816533	MASRRRMLLKVIILGDSGVGKTSLMNQYVNNKFSNQYKATIGADFLTKEVQIDDRLFTLQIWDTAGQERFQSLGVAFYRGADCCVLVYDVNVTKSFEKLNSWREEFLIQASPSDPENFPFVLLGNKIDVDGGNSRTVSEKKAKAWCASKGNIPYFETSAKEGFNVEAAFECIARNAVKNEPEEDIYLPDTIDVGGAGRQQRSSGCEC	11167.9	16024.9	25848.2	19326.2	18091.8	26686.1	24170.7	20972.7	21520	23337.3	16308.4	10472.8	19115.2	21722.7	16904.8	15375.4	10841.3	11998	14374.6	13147.3	19063.5	10591.5	13395	16040.1	14772.5
Bradi2g07650.1	0.00265435	0.00495944	0.637694	0.00873582	0.983147	0.999906	0.00873582	1.11417	0.632812	1.11417	0.632812	1.04064	0.989397	MESLGVLLLHPMNAYLEQELDRRFRLLRLWESPPDSRADFLRANASAIRAVVGNAGYNADAALIDALPSLEIVASFSVGIDRVDLAKCRERGIRVTNTPDVLTDDVADLAVGLAIAALRRIPQADRYVRAGLWKAKGDYTLTTRFSGKRVGILGLGRIGLAIAKRAEAFGCSISYHSRSEKPFPNYRFFTNVVDLAANCDVLVVACSLNAETHHIVSRKVMVALGPEGVLINIGRGAHVDEPELVSALLAKQLGAAGLDVFEHEPFAPEQLFGLDNVVLVPHIGSDTEETCMAMADLFSGKRVGIIGLGRIGLAVATRVEAFDCPVNYYQRTKKEYPNYTYYPTVLELASNSDVLVVACPLNEQTRHIVNREVIEALGPKGVLINIGRGPHVDEPELVS…	177268	248556	230738	293535	237524	245160	281932	302920	228555	264642	146056	167649	137881	149645	150308	267630	200901	266080	254097	247177	245166	277032	191977	225848	235006
Bradi2g07700.1	0.567337	0.584228	0.884164	0.868306	0.918563	0.900501	0.868306	1.88617	0.025239	0.0676008	0.025239	0.169924	1.88617	MAGSMVDRATSDMLIGPDWAKNMEICDICNRDPGQSKDVVKALRKRIVHKNPKVQLLALTLLETAIKNCGDIFQMHVAERDVLHEMVKMVKKKSDPRVKEKILVLIDTWQEALGGPRARYPQYYAAYHELVRAGAQFPKRTERPAPLFNGQSQAANSMRSPDQRDEAESSAGNDFPALNTTEIQNARGIMDVLAEMLNALDPGNREGLRQEVIVELVDQCRTYKQRVVQLVNTASDEELLSQGLALNDDLQRVLAKHDAIAAGIAVRVEKKPKSLQALVDTEDSANQDSKKEQALVDIDDPTSQDSKTEPNQSTSDQSPFEQLALPAPPMSNGSATHPPKPDSGIDLLSWDDTPSTAENSLALVPVTDPLADSTSNQNALAIVDIFSQTSTATSSAKPL…	17546.2	0	0	123.86	4417.51	0	387.273	807.236	0	298.627	0	293.639	1.17354	151.162	111.494	204.643	1998.05	799.87	0	750.641	327.685	374.425	229.352	32397.3	8332.18
Bradi2g07940.1	0.00908389	0.0143997	0.234675	0.99528	0.168256	0.317628	0.168256	1.19825	0.780312	1.19825	1.03017	0.780312	0.822653	MTSVWKTKVLPGLNKIFDKDGKKAAAAEFLKSFNKEEISKEIEDKKTELEPKVVETIEASPPEIKGLIKDKKTAKIKKNSVAVTKFLDDLAKIEFPGAKLVSDAVAKSGTTPLSPAIVFILDKVAPFVPEPKEEPKAEPEPAAAEETTSRDVVVEEEKKEEAAAPSEVVEEKKEEEKPAEAEAAAEPAAEPEKK	1.03507e+07	1.22936e+07	1.22252e+07	1.13527e+07	1.15556e+07	1.63374e+07	1.41815e+07	1.21254e+07	1.27412e+07	1.38464e+07	1.01101e+07	1.13508e+07	1.35114e+07	1.26445e+07	1.19042e+07	8.92748e+06	8.41864e+06	8.85536e+06	9.86629e+06	9.01694e+06	6.50943e+06	7.7296e+06	1.27127e+07	1.10731e+07	9.50622e+06
Bradi2g08100.1	1.7126e-05	6.60086e-05	0.0059793	0.148209	0.00982991	0.262395	0.0059793	1.44018	0.5863	1.44018	1.24811	0.5863	0.792134	MGCASSKDVAVADVAYRPPATSVSLFDISAVEEPWLIAKQSADAVVESGDDESEEEEEEEEEEEEEEVKKPTPGVPLPILDKLDGYELAPASWSEVSKALEDIKPTLGSKPPSDPKPLPKKKKKKQQQQQPAAAEAPAQPPPPQTPAQPAPSQTPAEAGKKAYMPGAEDTTKKPPPPELTGRRVVKENPFLLRDRESSKNADGTAAPRWRRRDPFEGFPERRPPGATGGGVVLYTTTLRGVRRTFEDCERARAAVETCAEAAGMGALDERDVALHGEYLRELRELLAGVEEEGGASVPVVPRLFVMGRYVGGAEACAGLAESGKLREMLRWARARGEACAAKDGRGCEGCGGARFVPCWECGGSCKVLVGGGDGAGAAVTVGGGVVERCGKCNENGLMI…	65513.5	72121.4	91425.7	107813	84218.4	99976.4	122316	141485	121380	121289	114451	101077	98893.1	106035	105114	42646.2	33587.1	64847.2	56428.6	49377.3	68397.8	67075.5	75187.8	56187.8	66712.2
Bradi2g08110.1	0.0153725	0.0228387	0.00637987	0.052831	0.0145089	0.043158	0.00637987	1.32108	1.22936	1.32108	1.22936	1.28541	1.23863	MLPASHPLLYACAFRDSALVAELAHEHDPATAGAGSTDDLPALAASLASAAPPHHRYVTHSAAGRAHALLLAPPLVLAAVSLAPQLPASHLLLFLRRLRCLPEHRMRDEMARLALRLPFLDDEALAREAADVAAAEAEAEEAARREGELARGTPKRERGGAGRAWRRQLWLIILADLVLLGVLFGAWLAVCRGFSCIGR	44011.2	41464	50201.3	53019.5	47174	58454.6	66731.9	65690.9	58405.4	62320.7	53288.4	69947.3	55674.7	53065.3	57993.9	54466.3	55679.3	66950.5	65455.8	60638	56543.2	59283.6	56625.3	61271.6	58430.9
Bradi2g08260.1	0.000113499	0.00031909	0.405734	0.00362664	0.000138021	0.000492789	0.000138021	0.861753	0.452029	0.861753	0.622753	0.452029	0.521727	MSTAAAQGGEKPALRKPVFVKVDQLKPGTNGHTLVVKVVSANPVPGRTRPGAPASSSRPPRIAECLVGDETGTIIFTARNDQVDVLKPGATAILRNAKIDMFKCSMRLAVDKWGRVEAAEPASFTVKEDNNLSQVEYELVNVAE	25668.3	28909	21240.8	19079.6	23724.4	21273.2	14901.7	23405.5	22198	20444.6	15082.9	12606.3	14122	17286.6	14774.4	14277.4	9494.84	11469.7	7654.62	10724.1	10366.2	11736.1	13777	13631.4	12377.7
Bradi2g08960.1	0.0111129	0.0171329	0.734891	0.0449207	0.00703371	0.0321066	0.00703371	0.867171	0.490186	0.867171	0.619697	0.490186	0.595992	MSLRPNERVEARKSSYKSTVDADDGRRRREGDMVEIRKSRREESLLKKRREGLQAQAPVPAAGVEKKLESLPAMVAGVYSDDINLQLEATTQFRKLLSIERSPPIEEVIKSGVVPRFVQCLGRDDFPQLQFEAAWALTNIASGTSENTKVVIDHGAVPIFVKLLGSGSDDVREQAVWALGNVAGDSPRCRDLVLESGALMPLLAQLNEHAKLSMLRNATWTLSNFCRGKPQPAFDQTKPALPALARLIHSNDEEVLTDACWALSYLSDGTNDKIQSVIDAGVCPRLVELLLHPSPSVLIPALRTVGNIVTGDDSQTQCIIDHQALACLLSLLTQNHKKSIKKEACWTVSNITAGNKDQIQAVINAGIIGPLVHLLQTAEFDIKKEAAWAISNATSGGSH…	17718.2	36449.5	40850	35907.4	32731.3	24391	32057.6	26215.3	30870.6	28383.6	14988.7	23031.3	20145	22969	20283.5	16972.2	17047.7	13635.6	16522.2	16044.4	19996.5	15700	30516	11817.9	19507.6
Bradi2g09070.1	0.0227191	0.0318919	0.824654	0.136019	0.00843415	0.152389	0.00843415	0.913885	0.619575	0.913885	0.771988	0.619575	0.778918	MFLVDWFYGVLASLGLWQKEAKILFLGLDNAGKTTLLHMLKDERLVQHQPTQYPTSEELSIGQIKFKTFDLGGHQIARRVWKDYYAKVDAVVYLVDAADKERFAESKKELDGLLSDDSLAKVPFLVLGNKIDIPIAASEEELRYYLGLSNFTTGKGNVNLSDSNVRPLEVFMCSIVRKMGYGEGFKWMSQYIK	73741	110211	125077	107622	104163	68484.7	107354	95001.9	109931	95192.7	72394.8	101737	69223.1	78294.3	80412.3	74892.2	54227.9	61380.5	67645.8	64536.6	73548.8	75655.4	89228.5	86104.1	81134.2
Bradi2g09120.1	0.00152985	0.00308026	0.0784669	0.00794594	0.00217113	0.000751326	0.000751326	0.598049	0.204688	0.598049	0.407225	0.303368	0.204688	MSFQDLEAGNGPRGAPRRNGRSAAGAGAGASQAVASGVFQINTAVATFQRLVNTLGTPKDTPDLRDRIHKTRAHITQLVKDTSDKLRQASEADHRVEVSATKKIADAKLAKDFQAVLKEFQKAQRLSAEREAAYAPFITQAGLPQSYNSTDMNNGADKLAEQRTQLLESRRQELVFLDNEIVFNEAIIEERDQGIQEIQHQITEVNEIFKDLAVLVHDQGAMIDDIDSHIDNSVAATAQAKGQLSKAAKTQKSNSSLICLLMVIFGVVLLIVIIVLAA	8917.43	6857.11	3856.91	4413.14	6011.15	3769.81	3104.29	3745.19	3760.55	3594.96	3740.2	1912.48	2608.93	1529.95	2447.89	1424.1	1603.4	3902.9	363.97	1823.59	829.91	541.029	2436.61	1114.08	1230.41
Bradi2g09470.1	0.00014497	0.000391128	0.564963	0.0487936	0.000271044	0.000182009	0.000182009	0.867327	0.407449	0.867327	0.704034	0.422439	0.407449	MDGGGGVGGGMAGPVGGGMVGPVGVGVGGGGGGGSDVELVSKTLQFEHKLFYFDLKENPRGRYLKISEKTSTTRSTIIVPIAGVAWFLDLFDYYIRTDERDVFSKELRLDTKVFYFDIGENKRGRYLKVSEASVNRNRSTIIVPAGSSGEEGWEAFRNVLLEISDEASRLYVLPNHPSQQHLEPPERLPGLSDDVGAGFIAGHASQSASGPEVDVERLVDVPPIEEFSGMGLSKVIRADQKRFFFDLGSNNRGHYLRISEVAGADRSSIILPLSGLKQFHEMVGHFVDIMKDRLEGMTGANVRTVEPSQR	23614.9	33852.2	31321.9	26656.1	28861.3	21071	23620.4	34006.5	21430.8	25032.2	23230.9	14551.1	24254.6	19240.7	20319.3	17941.7	11023.3	8059.53	11744	12192.1	13178	12835	10121.6	10903.5	11759.5
Bradi2g09720.1	2.47225e-06	1.54776e-05	0.999997	0.999984	2.90979e-06	0.000723369	2.90979e-06	148.298	1.91217	1.91217	2.33622	148.298	100.091	MSDQMDSGIKLFGRVIPLAPEAASGPPEADAAAGSDHPPPPPPPPPPPPELQTAAPAEEAEEEAHKDQHKETEDKEDSEMKVDVPPEKENRGIEGDAPREKEGNEMEVDAPQVNENAEPDSSSTLDHKKDTQDQINSAEDKADPKELNEKTANEESDQDKVLKKPDKIIPCPRCNSMDTKFCYYNNYNINQPRHFCKNCQRYWTAGGTMRNVPVGAGRRKSKNSSLHYRQLLMAPDCMMGSRVDISNTVNPEVLASLPTTPTKSTSRNETVLKFGPEVPLCESMASVLNIEEQNVINAGSVPIGEAREVNSCASSMTSHNGLPENAVHVDKNGAPVYCGGVGPMPPYYLGAPFMYPWSIGWNNLPVMVPGGSMSESASPSESCSTSSAPWMNSPMMPGS…	0	179.826	0	185.728	91.3886	210.368	201.311	69.0996	218.223	174.75	230.873	168.47	139.197	315.475	213.504	8617.94	10242.3	14154.2	21196.6	13552.8	7558.51	11275.4	8917.78	8836.85	9147.13
Bradi2g09760.1	3.30817e-07	3.21501e-06	0.00161426	2.17624e-10	0.000166407	3.49737e-05	2.17624e-10	28.9659	12.166	12.166	28.9659	14.7932	18.1439	MSFLWKSSNGGTTEKTMTVEEQQQKIDELRKQLGEPSSVAIQGFLSDASILRFLRARNWNVQKASKMLKAAVKWRAAYKPEMISWEDIAHEAETGKIYRADYKDKLGRTVLVLRPGLENTTSGKEQIKYLVYSLEKAIMNLTDDQEKMVWLTDFQGWTMGSTPLKVTRETVNVLQDCYPERLGLAILYNPPRLFESFWKIVKPFLDHETYKKVKFVYSDDKESLKIMAEVFDVDKLDSAFGGRNPATFEYNSYAEQMKQDDKKMQSTDAGSDASSEASFYSGSDSPKHGSAEQVAAKNG	2143.91	0	484.312	0	657.055	10024.3	11073.5	5213.7	5663.33	7993.7	16469.4	23489.6	16961.8	19207.8	19032.2	8998.09	12193.7	9639.46	8048.47	9719.92	11656.5	13295.9	13541.8	9191.83	11921.5
Bradi2g09950.1	1.64133e-05	6.37156e-05	0.350376	4.66067e-05	3.83429e-05	0.000127329	3.83429e-05	0.872083	0.496022	0.872083	0.509208	0.496022	0.531381	MERLQRIFGAGGMGQPPSDSPLLDSSEQVYISSLALLKMLKHGRAGVPMEVMGLMLGEFVDDYTVRVVDVFAMPQSGTGVSVEAVDHVFQTNMLDMLKQTGRPEMVVGWYHSHPGFGCWLSGVDINTQQSFEALNPRAVAVVIDPIQSVKGKVVIDAFRLINPQTMMLGQEPRQTTSNVGHLNKPSIQALIHGLNRHYYSIAINYRKNELEEKMLLNLHKKKWTDGLILKRFDTHSTTNEQTVQEMLSLAIKYNKAVQEEDELSPEKLAIANVGRQDAKKHLEEHVSNLMSSNIVQTLGTMLDTVVF	20810.7	31551.2	28992.5	23231.4	26146.4	21343.2	20822.8	26651.4	22390	22801.9	11705.4	15753.7	12650.5	13146.3	13314	11158.6	14848.3	12095.9	13774	12969.2	14756.7	14457.7	10236.6	16123.7	13893.7
Bradi2g10140.1	0.288047	0.312359	0.999968	0.349897	0.851276	0.94431	0.349897	1.16696	0.526727	0.976442	0.526727	0.769673	1.16696	MRVAATRPFFPAPGALFAALALVLVGSASLAIGAMASHVLGGKRESPAAANSLETDGLARFAVDEHTAPIPGEHEPGWRDVPVHDPVVKEAASHAVKSIQERSNSLFPYELLEIIRAKAEVVEDFAKFDILLKLKRGTKEEKIKAEVHKNLEGAFVLNQMQPEHDESSSQ	13884.8	10063.6	11968.2	13527	12360.9	8201.1	11722.9	14511.2	13843.6	12069.7	6088.32	9613.4	9730.72	610.875	6510.83	10856.4	2079.34	10437.5	14682.3	9513.86	6006.72	20779.7	23106.2	7806.01	14424.7
Bradi2g10910.1	0.263478	0.287334	0.572847	0.288463	0.425454	0.107755	0.107755	0.659475	0.35285	0.659475	0.517255	0.592652	0.35285	MDKPCTLLVHFDKGSAAMANEIKANLEGSDVAAKVEAMKRAVMLLLNGESLPQLFITIVRYVLPSEDHTIQKLLLLYLEIIDKRDSTGRALPEMILICQNLRNNLQHPNEYIRGVTLRFLCRLSEPEVLEPLVPSILENLEHRHHFIRRHALSAISSIYRLPHGDQLIPDAPELVERALGSEKDASARRNAFLMLCLCGQERAVVYLFSNAERVTEWPDLLQMAAVDLIRKVCRSPNRADKGRYIKIIISLLSSPSTAVVYECAGALVSLSSAPTAVRAAANTYCQLLSSQSDNNVRLILLDRLNELRTSHRDVMVDVVMDVLRALASPNLDVKRKVLDLVLDLLTPRNVEEVVLYLKKEVVKTQSGELEKGGEYRQMLVQAIHACAVEYPEVAGSVVH…	5827.73	18252.1	33077.5	17430.4	18647	7041.49	12893.3	16000.4	13253.6	12297.2	11254.7	11604.9	14601.2	1120.2	9645.23	14333.5	462.386	9654.96	19753.8	11051.1	12442	10303.6	959.278	2613.39	6579.58
Bradi2g10970.1	0.000900886	0.00192598	0.116805	0.58153	0.000268789	0.00979637	0.000268789	0.794119	0.0958501	0.612189	0.794119	0.0958501	0.391096	MREILHIQGGQCGNQIGSKFWEVVCDEHGIDPTGRYVGTSDLQLERVNVYYNEASCGRFVPRAVLMDLEPGTMDSVRTGPYGQIFRPDNFVFGQSGAGNNWAKGHYTEGAELIDSVLDVVRKEAENCDCLQGFQVCHSLGGGTGSGMGTLLISKIREEYPDRMMLTFSVFPSPKVSDTVVEPYNATLSVHQLVENADECMVLDNEALYDICFRTLKLTTPSFGDLNHLISATMSGVTCCLRFPGQLNSDLRKLAVNLIPFPRLHFFMVGFAPLTSRGSQMYRALTVPELTQQMWDSKNMMCAADPRHGRYLTASAMFRGKMSTKEVDEQMINVQNKNSSYFVEWIPHNVKSSVCDIPPRGLSMASTFVGNSTSIQEMFRRVSEQFTAMFRRKAFLHWYT…	16407.3	26528.4	53332	42954.5	34805.5	16041.8	29370.2	19481.1	20337.3	21307.6	22528.9	34412.4	31303	22314.6	27639.7	4481.52	1202.29	4050.77	3609.89	3336.12	10597.3	17066	15455.1	11330.8	13612.3
Bradi2g11030.1	1.30057e-08	2.78487e-07	0.996268	0.577108	5.75423e-09	3.96384e-08	5.75423e-09	74.5365	2.97105	2.97105	9.97601	74.5365	72.2091	MGIAMSRDRQDGRLLSLLALQVLLDYGRAGATRPPVTAALLAANTLLYLRPGNLDALLPRLPRVLFNPHLIIEFGDLRRFLFSVFFHTSEPQFVMNMSSLLWRGGRLEEYMGSFEFASMVASLIGLSQGFTLLLSKGLLLLGDGTAYYQYSSGFSGVLLGMQVLNARAGDIVLFGVCIPAKYAELAQLFLMQALIHEVNIVGNLSGILAGLTYLWLKNGPDPLSDIANVVSRSVRFARGIVRSAARRCQSCSGRRVFASVQREVGQDLVDGFELSPQVVTVVQGSPAGGGPLIPQARYRSPPGASTTIVEMNKALAFAATSSFAPSTPDLSALLADALSGGCSSLHISPGPGNRHLLPWSPWLETSLHSSLIRNKLHELLSRLALASHTETLQDDAA	709.296	1273.48	1271.57	796.48	1012.71	5821.58	3867.34	1141.63	1204.65	3008.8	10188.3	9515.01	13495.3	7212.49	10102.8	80828.1	53385	77472.9	90248.3	75483.6	57930	58698.1	92387.8	83490.6	73126.6
Bradi2g11230.1	0.00730432	0.0118717	0.0100948	0.0172056	0.0032736	0.0188391	0.0032736	1.27858	1.21716	1.23858	1.22042	1.27858	1.21716	MSCFACCGGDDTQGAPDNRGSYASGYPARNDAYRTADPTPKGAQPVKVQPIAVPTISVEEIREATKDFGDETLIGEGSFGRVYFGALKNGRSAAVKKLDSSKQPDQEFLAQVSMVSRLKHENVVELLGYCVDGNTRILVYEFATMGSLHDMLHGRKGVKGAQPGPVLSWTQRVKIAVGAAKGLEYLHEKAQPHIIHRDIKSSNVLLFDDDVAKIADFDLSNQAPDMAARLHSTRVLGTFGYHAPEYAMTGQLSTKSDVYSFGVVLLELLTGRKPVDHTLPRGQQSLVTWATPRLSEDKVRQCVDSRLGSEYPPKAVAKFAAVAALCVQYEADFRPNMSIVVKALQPLLNARSSNPGEHRS	312555	300303	342378	396598	337959	405339	475484	384937	408593	418588	384667	443937	386819	434378	412450	427985	452384	431698	416362	432107	410228	389951	445645	399580	411351
Bradi2g11290.1	0.00207002	0.00398922	0.999942	0.999866	0.00268048	0.327801	0.00268048	19.3193	0.508447	0.601859	0.508447	19.3193	8.10824	MRRTKKRGGGLAGRSHKSTTPPNGDLHEENWTRLSDDDFARRLHKSIRGCNGSGKITESMALGDLHGDSNRYDWTRLSDELKSSLSRSVVSLALCNGDTVLFACSSIAVDCQENHTRFLTSATLARAFISGDKRKFHDNLKIKVRHEGNEVYEGVLSEYDLYHNFAIVIINTSLDVHVGLFKHRVENRPHGMVLALARGISGTLIPTNVILASEDHDAHCQMSEVLEGGPLFTFDGNFVGMNLFLVIVKAYFVSRSSILDWLNCKSLQKKTYLPRSKSLKAARFGSRLTCDKLNGHSEVQRPIHRDDMTSGYCRDLESLGYPQPQIDMVDDGMILVNTFEDPFGDAYPEGVWHEFSKSASSDIDRYVVALASFKGWKRHFACTGFFIEWNGSTTILTSA…	6745	5279.49	4296.98	3373.4	4923.72	2602.84	1781.64	4226.95	3242.11	2963.39	2704.24	1751.38	2924.48	2633.7	2503.45	185286	52629.5	69069.6	73506.8	95123	12388.7	19504.5	75020.2	52777.4	39922.7
Bradi2g11480.1	3.13962e-05	0.000111457	0.000522022	0.000108154	1.60571e-05	3.60073e-05	1.60571e-05	0.717358	0.625844	0.717358	0.669609	0.630992	0.625844	MATGQIFSKTTQALFYNYKQLPIQRMLDFDFLCGRETPSVAGIINPGSDGFQKLFFGQEEIAIPVHPTIEAACNAHPTADVFINFASFRSAAASSMSALKQPTIRVVAIIAEGVPESDAKQLISYARANNKVIIGPATVGGVQAGAFKIGDTAGTIDNIIQCKLYRPGSVGFVSKSGGMSNELYSTIARVTDGIYEGIAIGGDVFPGSTLSDHILRFNNIPQVKMMVVLGELGGSDEYSLVEALKQGKVQKPVVAWVSGTCARLFKSEVQFGHAGAKSGGELESAQAKNQALRDAGAVVPTSFEALESVIKETFDKLVEAGNIPPVAEITPPPIPEDLKTAIKSGKVRAPTHIISTISDDRGEEPCYAGVPMSTIIERGYGVGDVISLLWFKRSLPRYC…	943649	1.14864e+06	1.13787e+06	908815	1.03474e+06	647613	721835	748725	850950	742281	701593	608302	709014	752585	692873	648655	758517	614157	590330	652915	615517	654481	691398	628955	647588
Bradi2g11510.1	1.84451e-05	7.00912e-05	9.2015e-05	7.83033e-05	1.54811e-05	9.40011e-06	9.40011e-06	0.27371	0.134496	0.27371	0.255624	0.202128	0.134496	MAPLAPSAGARLLRRLLTTAAEVAPEAAPPVTKNARKAAHPIGKKVPSDTAQPVPKVASEAAHPVAVDANKAVTKDSRPLYRRLSALGNAGEGSVSRVLNKWVREGREARSVDLERYVKELRKYKRHAQALELMDWMVHTKGMNMSYTNHAIRLDLVYKVRGIEAAEKYFNGLPDPAKNHRTYGALLNCYCSSKKEEKATDLFHKMDDLGIASSTLPFNNLMSLYMKLGQHKKVAGLFEEMKAKNVKPDNLTCCVLMTSYAALNKIDAVEEVLKEMEEKNAALGWSAYSTLASIYVSAGLVEKAESALKKLEGLVQPRDGRQPFDFLMSLYASVGNLSEVNRVWDVVKATFPKVTNTSYFSMLQALYKLNDADRIKQIFEEWESNHECYDVKLTNIMTR…	691607	1.84202e+06	1.7719e+06	1.93366e+06	1.5598e+06	502852	460324	343528	401023	426932	372964	387835	462923	371165	398722	416855	262215	316882	265166	315279	156322	149685	321734	211403	209786
Bradi2g11920.1	6.72938e-06	3.15206e-05	0.0858847	0.00467039	7.9941e-06	2.11793e-06	2.11793e-06	0.75047	0.236507	0.75047	0.597105	0.264825	0.236507	MDPTLFIIGIIGNIISVLVFISPVTTFWRIVRGGSTEEFEPAPYVMTLLNALLWLYYGLTKPDGLLIATVNGFGALMEAIYVVLFLIYANDHGTRVKTAKLVAALDIAFFGVVFATTTFAIAELDMKIMVVGLICACLSVFMYGSPLAAMRTVITTRSVEYMPFFLSFFLFLNGGVWAFYALLDRDVFLGVPNGFGCVLGGIQLIIYAVYKNCKVDSPSSDEAADDGWQAAASASLLSSSDANRHGLEDAASNRV	19068.1	26197.1	24861.3	17282	21852.1	18717.6	10883	16961.9	19035	16399.4	10411.4	11554.8	12059.9	18166.1	13048	7571.69	6268.07	4997.98	4310.22	5786.99	4969.21	2972.41	6218.18	6512.98	5168.19
Bradi2g12020.1	4.37897e-05	0.000146218	0.00392263	0.0184598	0.584055	0.149325	0.00392263	1.37401	0.802035	1.37401	1.30163	0.888372	0.802035	MVHPVAEANERSPFGELTAEEFYARHGVTHSSSTFVNPRGLRIFTQRWVPSGGAPVLGAIAVVHGFTGESGWMVLLTAVHFAKAGFAVAAVDHQGHGFSEGLQAHIPDIGPVLDDCEAAFAPFRADYPPPLPCFLYGESLGGAIALLLHLRDKQRWRDGVVLNGAMCGVSPRFMPPWPLEHLLWVAAAVAPTWQVAFTRGNIPGRSFKVEWKRALAMASPRRTTAPPRAATALELLRMCRELQARFEEVEAPLLAVHGGEDTVCDPGCVEELHSRAGSKDKTLRVYPGMWHQIIGEPEENVEKVFGDVVDWLKARATAAGAGAGLQ	73941.5	100358	116742	113443	101121	122485	137593	150529	145157	138941	112540	134340	131358	148251	131622	97462.1	85354.3	87159.6	89356.4	89833.1	72161.6	84460.9	94706.4	73081.5	81102.6
Bradi2g12067.1	2.93347e-06	1.75878e-05	0.992715	0.995408	0.00236338	5.05696e-06	5.05696e-06	16.8162	0.298715	0.298715	0.379258	10.4272	16.8162	MAMAPPATSTCATALHLPHPSPPLGSSVCGDGRLQFRRRRCLALQRRGGGGHVARAALGGLLGGMFGGGGGDDGETARRKYADTVVLVNRMEPEVSALSDADLRARTAALQERARAGESLDSLLPEAFAVVREASKRVLGLRPFDVQLIGGMVLHKGEIAEMKTGEGKTLVAILPAYLNALSGRGVHVVTVNDYLARRDCEWVGQVPRFLGLQVGLIQQNMTPEQRRENYLCDITYVTNSELGFDYLRDNLAMTVDELVLRNFNYCVIDEVDSILIDEARTPLIISGLAEKPSDRYYKAAKIAEAFEQDIHYTADEKQRNVLLTEQGYADAEEILDINDLYDPREQWASYVLNAIKAKELFLRDVNYIVRSKEVLIVDEFTGRVMAGRRWSDGLHQAIE…	369.292	6.06396	59.9054	1.56404	109.206	72.0099	45.9183	0.0753843	12.4829	32.6216	0.591261	9.17251	135.761	20.1444	41.4174	1455.26	690.815	1798.46	610.349	1138.72	1734.81	1232.47	2231.29	2147.18	1836.44
Bradi2g12120.1	1.22079e-05	5.08284e-05	0.995534	0.936112	0.00510364	2.45483e-05	2.45483e-05	3.90679	1.11609	1.11609	1.24466	2.61005	3.90679	MMESPSSSPTLQDHLSVTTGPLHLKVWEVVCIALGAFMVVVFFLTVWFTIRSRKRIRRASANIPVTQIPAISKEIKEVRVEQVPASDFGAHDGVLLTFQDKAGDRESDKDKVMVHLGVSKSRRGDESNSGSFRYMDKDAGFQSAEEGGSGTFRQTSAHAITAPSPLVGMPEFSYLGWGHWFTLRDLELATNRFSKDNIIGEGGYGIVYRGEIVNGTPVAVKKLLNNLGQAEKEFRVEVEAIGHVRHKNLVRLLGYCVEGTQRILVYEYVNNGNLEQWLHGGMSHRGSLTWEARIKILLGTAKALAYLHEAIEPKVVHRDIKSSNILIDDDFDAKVSDFGLAKLLGAGKSHVTTRVMGTFGYVAPEYANTGLLNEKSDIYSFGVVLLEAITGRDPVDYGR…	47093.3	49960.7	55436.1	42536.2	48756.6	52875.9	61607.7	43883.8	59300.4	54417	51232.5	67188.7	56674.4	67645.5	60685.3	142109	101104	135346	130471	127257	116686	167377	250124	227740	190482
Bradi2g12160.1	0.00168832	0.00335922	0.0261922	0.001954	0.299511	0.00118599	0.00118599	0.844629	0.581497	0.72018	0.599244	0.844629	0.581497	MAAETFLFTSESVNEGHPDKLCDQVSDAVLDACLAQDADSKVACETCTKTNMVMVFGEITTKATVDYEKIVRDTCRNIGFISDDVGLDADRCKVLVNIEQQSPDIAQGVHGHFTKRPEDIGAGDQGIMFGYATDETPELMPLSHVLATKLGARLTEVRKNGTCAWLRPDGKTQVTVEYLNEGGAMVPVRVHTVLISTQHDETVTNDEIAADLKEHVIKPVIPEKYLDEKTIFHLNPSGRFVIGGPHGDAGLTGRKIIIDTYGGWGAHGGGAFSGKDPTKVDRSGAYIARQAAKSIIASGLARRCIVQISYAIGVPEPLSVFVDSYGTGTIPDKEILKIVKENFDFRPGMISINLDLKKGGNRFIKTAAYGHFGRDDADFTWEVVKPLKFDKASA	149753	165634	157935	132892	151554	102685	120448	102446	111005	109146	82511.8	113975	79674.6	87109	90817.5	170436	126371	130138	85081.4	128007	90024.9	68769.5	99726.2	93991.3	88128
Bradi2g12280.1	6.78513e-07	5.68518e-06	0.997218	0.00016965	8.53312e-06	1.05299e-06	1.05299e-06	0.990006	0.683792	0.990006	0.74674	0.717423	0.683792	MQIFVKTLTGKTITLEVESSDTIDNVKAKIQDKEGIPPDQQRLIFAGKQLEDGRTLADYNIQKESTLHLVLRLRGGAKKRKKKTYTKPKKQKHKHKKVKLAVLQFYKVDDSTGKVTRLRKECPNADCGAGTFMANHFDRHYCGKCGLTYVYNQKA	1.3257e+06	1.08304e+06	1.23303e+06	1.0444e+06	1.17154e+06	1.23113e+06	1.14629e+06	1.14403e+06	1.11788e+06	1.15983e+06	858145	877118	852996	911090	874837	840571	783530	871233	866629	840491	802147	775016	837867	789337	801092
Bradi2g12510.1	0.30521	0.329911	0.860635	0.877576	0.490551	0.844114	0.490551	1.15937	0.717332	1.15937	0.847631	0.717332	0.834113	MFLWDWFYGVLASLGLWQKEAKILFLGLDNAGKTTLLHMLKDERLVQHQPTQHPTSEELSIGKIKFKAFDLGGHQIARRVWKDYYAKVDAVVYLVDAYDKERFAESKKELDALLSDDSLANVPFLILGNKIDIPYAASEEELRYHLGLSNFTTGKGKVNLGDSNVRPLEVFMCSVVRKMGYGDGFKWVSQYIK	77625.8	112770	161915	207410	139930	84469.2	173736	168838	221882	162231	126677	160753	112493	74513.2	118609	85490	99680.5	95151.3	121183	100376	91466.9	141406	135951	98045.4	116717
Bradi2g12520.1	2.18064e-07	2.35334e-06	0.000237585	2.32445e-07	5.4923e-08	1.26556e-06	5.4923e-08	5.59363	3.56435	3.56435	5.2314	5.59363	5.23276	MSFSTTAAVVGGTARSDAIRPADLRFCGLRREAFGLRLLRSSPQAAAAKRMVLAAEATGNGAAGSGGFDYDLVIIGAGVGGHGAALHAVEKGLKTAIIEGDVVGGTCVNRGCVPSKALLAVSGRMRELQDEHHMKSLGLQVSSSGYDRQSVADHANNLASKIRSNLTNSMKSLGVDILTGFGTVVGKQKVRYGKVGFPDNEITARNIIIATGSVPFVPKGIEIDGKTVFTSDHALKLESVPDWIAIVGSGYIGLEFSDVYTALGSEVTFVEALDQLMPGFDPEIAKLAQRILINPRKIDYHTGVFASKITPAKDGKPVLIELIDAKTKEHKETLEVDAALIATGRAPFTKGLGLENINVVTQRGFIPVDERMQVTDADGNVVPNLYCIGDANGKLMLAH…	14070	17173.5	5438.77	9825.21	11626.9	34233.8	48536.4	36767.9	46230.8	41442.2	59792	58209.8	74090	51207.5	60824.8	69778.5	65693.5	70475.4	54198.6	65036.5	72015.2	61040	56872.7	53434.6	60840.6
Bradi2g12560.1	8.73407e-06	3.92742e-05	0.988639	0.132215	0.000115272	0.196577	0.000115272	1.82388	0.705097	1.04796	0.705097	1.82388	1.26369	MAIRQISRQTLALLFVVAAASFAALVFADGDDVVVLTEGTFEKEVGQDRGALVEFYAPWCGHCKKLAPEYEKLGASFKKARSVMIAKVDCDEHKSVCSKYGVSGYPTIQWFPKGSLEPKKYEGQRTAEALAEFVNKEGGTNVKLATIPSSVVVLTPETFDSVVLDETKDVLVEFYAPWCGHCKHLAPIYEKLASAFKLDDGVVIANVDADKYKDLGEKYGVTGFPTLKFFPKGNKAGEDYDGGRDLGDFTKFINEKCGTSRDTNGQLTSEAGRIASLDTLAKEFLSVASDKRKEVLSSIEEEVAKLSGSAAKHGKVYVTIAKKILDKGNDYTKKETERLHRILEKSISPSKADEFIIKKNVLSTFSS	6898.05	8348.13	6968.16	5581.94	6949.07	6231.99	7878.84	7396.23	7622.24	7282.32	6297.84	4456.25	4132.36	4712.63	4899.77	11768.4	13059.5	15595.3	10273.7	12674.3	9271.05	8279.72	9817.82	7757.21	8781.45
Bradi2g12660.1	1.61447e-05	6.30456e-05	0.27508	0.0641691	0.0455873	0.00181205	0.00181205	1.6518	0.612169	0.737355	0.612169	1.41495	1.6518	MSEVFEGYERQYCEISASLSRKCTAASSLLGEKLKQKASEIKSGIDGAEALIRKMDLEARNLQPSVRAGLLAKLREYKSDLNNLKGTLKRITTGNAQQGTREELLESGMADTLVVSADQRSRLLRTTEKQNQTTDRIRDSHSTMLETEDLGVSILHDLHQQRQSLLRANDTLHSVDDNISKSRRIMGAMVRRMDRNKWIIGLIVTLLVLAILVILYFKFVH	2748.68	3862.8	3728	2079.77	3104.81	1968.98	2273.44	2046.47	2868.51	2289.35	1333.7	2106.24	1788.38	2374.36	1900.67	4154.58	3754.76	4567.89	5095.43	4393.16	4362.76	5774.86	4405.09	5971.45	5128.54
Bradi2g12680.1	0.000771069	0.00168859	0.74626	0.00511159	0.8534	0.0187495	0.00511159	1.53055	0.869689	0.869689	1.53055	1.10561	1.44146	MRRKLPGEAPPSAGGGSLPSEADLAQLSTAISAGEDLGPFVRRAFACGRPEPLLSSLRAVARDREAEIEELCRAHFHDFIRAVDDLRSLLADADVLKGSLSASHSALLSSAAPLLASLESFLAARALAGNLSSALASSRRCVRLLALAARANEHLQAGNHSLYLALRAVDAIDRDLASGPEPLPLPALRRMLLSLVPAVRVHAEREISREFADWMVSIRAASRHLGQVAIGRSAAARQRQEELRSKHRPLEESITLDDDGAGDLDDFAAATASSDVADGAAAASFDLTQLYRAMHIHQTLALGERFKKYYLENRKLQLTSDFDVIAATPFLESHQVFFAQIAGFFIVEDRVFRTGGGLTSRGDVDALWEAAVGKMISVLEDNFSRMQTANHLLLITDYA…	43807.7	22655.9	34769.7	26347.5	31895.2	20153.3	31817.2	23049.8	35935.3	27738.9	50370.5	51472.2	48415.8	45009.9	48817.1	38076.1	28435.9	38398.2	36144.5	35263.7	43301.3	51015.9	47614.1	41971	45975.6
Bradi2g12727.1	0.00658918	0.0108606	0.639796	0.264095	0.214626	0.300915	0.214626	1.68148	0.364826	0.602619	0.364826	1.68148	1.60449	MELASSTPPAPWWLTTRACDLPSADTTGFLDWAAFLFLSACSQRVMLSAVSSAFLLVLFCFAAHRLVTRRRRRHGGGDGAEKPLLDRGEGQEARGAVRVGAGFVVALAASALLAAFYGVLLVLSVVARPGEIQEPVFLALQCAAHLAAAALVGHEKRFRAAAHPLTLRLFWLASAALTALLAGSSVARLASAAALLPDDALAIAALALSLPLPLLAVSGATGITTALVLPAAASQGLNGDNEEDAAGIKQDEKNVTPYARASWASRASWAWMNPLIKRGYRATLDLSDVPTLAPAHRPERMHQLFLSHFPSSANKADNPVRQTLFRCFWPLFLVNAALALLRLTVMYVGPTLIQSFVSFTSAPERRPLWEGVRLVLALLAAKAVEAFCSHQYNFHCQKL…	21762.4	13340	10308.2	10761.6	14043	7079.04	2190.03	10283.6	14297.7	8462.6	4396.64	3954.82	4067.65	8073.98	5123.27	25445.1	29220.5	24722.3	15064.7	23613.1	14391.4	21000.5	40617.3	14118.6	22532
Bradi2g12790.2	1.45547e-05	5.82621e-05	0.994835	0.000166454	6.5474e-05	0.00581909	6.5474e-05	1.70759	1.03224	1.03224	1.64235	1.70759	1.42504	MDMADIEAGTVSTDSNSSRRSQDDTATLIPNSGNLEGSSHRATKTTRFKDEDEVVEITLDVQRDSVAIQDVRAVDDGGSGHGGGFDGLSSSSSRGGKLSSKFRQVTNGLKLKNPSKKVPQAPAPKTVRKRFDRSKSTAAVALKGLQFVTAKVGNDGWAAVEKRFNHLQVDGMLLRSRFGKCIGMEGSDEFAMQMFDSLARKRGIVKELLTKDELKDFWEQLSDQGFDNRLQTFFDMVDKNADGRITAEEVKEIIALSASANKLSKIKERADEYTALIMEELDPNNLGYIELEDLEALLLQSPSEAVARSTTTHSSKLSKALSMKLAPSKDTSPFRHYWQELLYFLEENWKRIWVVTLWLSICVVLFIWKFIQYRNRAVFHIMGYCVATAKGAAETLKFN…	242306	208275	260623	204408	228903	199633	252245	217040	276211	236282	376375	329543	379048	418793	375940	338684	352049	432002	440756	390873	346216	336937	297663	323966	326196
Bradi2g12830.1	0.0148689	0.0222621	0.0722076	0.0922728	1	0.931644	0.0722076	1.21392	0.949332	1.21392	1.2027	0.99804	0.949332	MDQSRVVKPAGLSDSRRSGYNMGAAASGKQQQLSVDWCSVALRVFILAATLVSAVVMGVDRQTTTVQVTIADTLPPLQVPVTAKSSYSSAFVYLVVANAMACVFSAASLAACRSRSAVVPVMIGDLVVLALLFSAVGAAAEFGILGERGNSHVRWGKVCHVYGRFCERAMAAVIVSLIAGFASLVNLMLAILTLHKNSSYY	55546.8	49923.2	49799.8	46501.3	50442.8	60662.9	57908.2	63713.6	62649	61233.4	59566.5	65265.5	54433.4	63404.1	60667.4	37998.4	46376.9	55059	61941.4	50343.9	49253.9	40327.5	48599.6	53366.8	47886.9
Bradi2g12937.1	0.00558307	0.00946176	0.436609	0.528692	0.0528907	0.0889675	0.0528907	1.13297	0.720903	0.851434	1.13297	0.720903	0.74937	MGCVFGRASSSATRKKEKASPKPAPSNGSPADGDKSLGRPRRRLGRRTGPRQGCVPAPAAAEQLAAGWPPWLVAVAGEALRGWTPRRADTFEKLNKIGSGTYSNVYRARDTVSGRIVALKKVRFDNLEPESVKFMAREILILRRLDHQNVIKLEGLVTSRMSCSLYLVFEYMEHDLAGLAASPEVKFTLPQIKCYMHQLLSGLEHCHDNNVLHRDIKGSNLLLDNNGVLKIADFGLAALFDPRHKRPMTSRVVTLWYRPPELLLGATDYGVGVDLWSAGCILAELLYGKPIMPGRTEVEQLHKIFKLCGSPSEEYWKKSKLPHATIFKPQQPYKRCIRDTFKDFPPSSLQLVETLLAIDPAERQTSTAALQSEFFASEPYACDPSSLPTYPPSKEMDAK…	9644.01	6766.41	8479.45	8534.13	8356	6577.48	7023.11	6776.81	8080.93	7114.58	8344.06	10243.2	9933.95	9347.11	9467.07	4628.91	6410.58	7414.86	5641.11	6023.86	8859.15	5315.03	6319.8	4552.97	6261.74
Bradi2g13050.1	7.73183e-08	1.07528e-06	0.874164	0.759289	0.980427	3.55052e-08	3.55052e-08	6.34494	0.481766	0.593341	0.481766	1.23076	6.34494	MEPLTPLLTPYRMGEFNLAHRVVLAPLTRCRSYGNVPQPHNVLYYAQRAAEGGLLIAEANAVSETARGYPNVPGLWSQEQVEAWKTVVDAVHAKGGVFFCQIWHTGRVSPTEFQPNGGAPISSTDKQVKPAVSHDGTVLEFAAPRRLETEEIPHVVNDFRIAARNAIKAGFDGVEIHAANGYLIDQFMKDGVNDRTDEYGGSLENRCRFAAEVIAAVADEVGPSRVGVRLSPFADYVDCIDSDPEALALHVIRIMNGLGVLYCHVIEPRMCVNENDGRLIIPHRLMPFREAFDGTFMVNGGYDREEGDKAVGNGYADLIAYGRLFLANPDLPERFRKNAALNKYDRSTFYTSDSVVGYTDYPSLDQALDFVKE	9609.09	14042	12852.6	7306.75	10952.6	3724.37	8527.1	6821.25	6921.81	6498.63	5454.64	5314.19	3925.44	6412.12	5276.6	12963.5	5118.76	15411.1	20426.9	13480.1	43302.8	74187.4	78525	81959.5	69493.7
Bradi2g13082.1	0.131736	0.153332	0.202862	0.904385	0.0774564	0.235912	0.0774564	1.80212	1.21476	1.62618	1.21476	1.80212	1.59625	MSPQTETKASVGFKAGVKDYRLTYYTPEYETKDTDILAAFRVSPQPGVPPEEAGAAVAAESSTGTWTTVWTDGLTSLDRYKGRCYHIEPVPGEDSQWICYVAYPLDLFEEGSVTNMFTSIVGNVFGFKALRALRLEDLRIPPTYSKTFQGPPHGIQVERDKLNKYGRPLLGCTISQNWDYLQKITAETGEIKGHYLNATAGTCEEMMKRAVFARELGVPIVMHDYLTGGFTANTTLAHYCRDNGLLLHIHRAMHAVIDRQKNHGMHFRVLAKALRMSGGDHIHAGTVVGKLEGEREITLGFVDLLRDDFIEKDRARGIFFTQDWVSMPGVIPVASGGIHVWHMPALTEIFGDDSVLQFGGGTLGHPWGNAPGAAANRVALEACVQARNEGRDLAREGNE…	420663	414971	920802	1.8712e+06	906909	1.12798e+06	2.0931e+06	1.448e+06	1.23011e+06	1.4748e+06	1.32319e+06	1.34234e+06	1.00832e+06	732864	1.10168e+06	1.55788e+06	1.39888e+06	1.72861e+06	1.85207e+06	1.63436e+06	1.13672e+06	1.74507e+06	1.57081e+06	1.33802e+06	1.44766e+06
Bradi2g13110.1	0.0132745	0.0201659	0.106184	0.0268683	0.0136552	0.941379	0.0136552	0.926777	0.566214	0.702948	0.609291	0.566214	0.926777	MAPVKVFGPAMSTNVARVLVCLEEVGAEYEVVNIDFQAQEHKSPEHLVRNPFGQIPAFQDGDLLLFESRAISKYVLRKYKTDKVDLLREGNLKEAAMVDVWTEVDAHTYNPALSPIVYECLINPMMRGIPTNQKVVDESLEKLKKVLEVYEAHLSKHKYLAGDFISFADLNHFPYTFYFMGTPHAALFDSYPHVKAWWERIMARPSVQKLGASMVPPKA	71825.6	119830	156728	140390	122194	60548.8	77113.3	108114	97806.6	85895.7	71717.1	75789.3	59116.2	91183.1	74451.5	40466.4	67775.4	84237.8	84271.2	69187.7	116301	108641	120461	107581	113246
Bradi2g13236.1	0.000214041	0.000547895	0.998955	0.490309	0.0331777	0.00169553	0.00169553	1.19782	0.352068	0.971916	1.19782	0.568047	0.352068	MSLHLPLLFLLAVFLFPTSLHSQPTSPPPPARCPLNFTALRPFLGPQQPPSDDASRCALALQSVRLLLSLHLAATGSFLVPAADASSSCLPPLRAALPFQLPPPDACGLGGLDALLSAPGCSNVSTLADFDRLVPASARRDINASCDRELGPVPVCTACTTSLSKAAAAYLLPGSPDGGNNVTGCVQYPFIYAGAAASPRGPDDPDTAFCLYLLSASSGSIGGSGAPGWLYGVVFGCIGFVLVVAAAAGSWFLLRRHRRRAAAAALAAARADSRSKRSQAMESISASTTLVKFTYDEIKTATGGFTRESLIGRGGFGNVYQGVLPDGTEVAVKRFKNCSAAGDSAFAHEVEVVASVRHVNLVTLRGYCIATTQREGHQRMIVCDLMHNGSLHDHLFSSG…	24205.2	36667.1	45701.2	31062.4	34409	37230.8	31987.4	28936.4	35615.8	33442.6	35497.1	38672.6	49004.9	41688.3	41215.7	21050.1	13601.8	26922.5	16609.2	19545.9	18623.2	8863.73	20936.1	34.1282	12114.3
Bradi2g13450.1	0.000182844	0.000479878	0.107312	0.000194679	0.00138533	0.000177029	0.000177029	0.800906	0.52447	0.800906	0.52447	0.607243	0.526736	MSSAAAIGAGKAVCVTGASGYIASWLVKLLLARGYTVRATVRDTDDPKKTLHLHALDGAKDRLHLFKASLLEEGSFDAAIAGSECVFHTASPFYHNVKDPKAELLDPAVEGTLNVLRSCKKASIKRVVVTSSMAAVAYNEKPRTPDVVVDETWFSHPELCEKNQQWYVLSKTLAEDAAWKFSKDNGFEMVTINPAMVIGPLLQPTLNTSAEVILKLINGSSSTYPNFSFGWINVKDVALAHILAYEVPSANGRYCMVERVAHHSEILKIIHELYPNLPVPDKCADDGPFVPTYQVSKDKIRSLGLQLIPLETSIKETIESLKEKGFLSL	34825.5	52551.8	42846.9	44422.1	43661.6	27703.4	42959.9	28005.5	41206.4	34968.8	20861.5	26487.2	19261.2	24986.8	22899.2	25582.8	24494	26316.3	29659.6	26513.2	20860.1	25158.1	22192.8	23781.5	22998.1
Bradi2g13810.2	0.289004	0.313146	0.952875	0.988569	0.999948	0.196995	0.196995	1.39451	0.982079	1.10743	1.07188	0.982079	1.39451	MASPGKMEGPSAPALRRDPYEVLSVSRDSSDQEIKSAYRKLALKYHPDKNVSNPEASELFKEVAYSYSILSDPEKRRHYDTAGFEALENEGMDMEIDLSNLGTVNTMFAALFSKLGVPIKTTVSPTVLEEAMNGTVTVRPLPVGTSATGKVEKQSAHFFGVTISEEQAHLGIVVRVTSVAQSKFKLLFFEQEVNGGYGLALQEDSQKTGKVTSAGMYFLHFQVYRMDSTVNALAMAKDPEAAFFKRLEGLQPCEVSTLKSGTHIFAVYGDNFFKPASYTIEAMCAKSYEETTQRLKEIESKILEKRNDLRQFETEYRKALARFQEVTTRYTQEKEAVDDMLRERDDIHSSFTTERTMVNSVGSGSSSSRYPAEQSRTESPENGNIDARDKSSKKKWFNL…	2608.72	1586.9	2178.05	1859.41	2058.27	2209.92	2292.6	2381.4	2233.6	2279.38	1817.28	2299.65	2277.91	2430.05	2206.22	1848.98	3023.35	1037.81	2175.39	2021.38	3765.66	3449.23	2305.57	1960.68	2870.28
Bradi2g14210.1	0.00345585	0.00623254	0.95903	0.205295	0.0121703	0.0279731	0.0121703	1.06932	0.532691	1.06932	0.738217	0.532691	0.591057	MSASSKLCQSACKAARSLLSSASAPRSSVLADGRNAALATLTNLGRSKLPAAYSYHKAGGAAAASSTHAYMLQDQEAHAAEMERTFIAIKPDGVQRGLISEIVSRFERKGFKLVAIKLVVPSKEFAQKHYHDLKERPFFSGLCDFLSSGPVLAMVWEGEGVIKYGRKLIGATDPQKSEPGTIRGDLAVVVGRNIIHGSDGPETAKDEIALWFQPKELVSYTSNEEKWVYGVN	15574.8	22850.9	14439.7	12822	16421.9	14427.9	16528.8	17059.6	22224.9	17560.3	10558	16254.9	10692.2	10986.4	12122.9	10463.4	6148.35	8132.78	10246.6	8747.78	11290	5921.68	11599.1	10014.3	9706.26
Bradi2g14400.1	6.56378e-05	0.000204022	0.999822	0.0101218	0.000328225	0.000677464	0.000328225	0.987537	0.437066	0.987537	0.638056	0.437066	0.493042	MATRYWIASLPVQSAGGGDSSAKSALWARLQDSISRHSFDTPLYRFNVPDLRPGTLDSLLALSDDLVKSNIFIEGVSHKIRRQVEDLERAGGVEGGALTVDGVPVDSYLTRFVWDEGKYPPHGPLKETVASIQSQVAKIEDDMKVRVAEYTNVKSQLSAINRKQTGSLAVRDLSNLIKPEDMVTSEHLVTLLAIVPKYSQKDWLASYESLDTFVVPRSSKRLYEDNEYALYTVTLFAKVVDNFKVHAREKGFQIRDFEYSPEAQESRKQELEKLLQDQELMRTSLLQWCYASYSEVFSSWMHFCAVRVFVESILRYGLPPNFLSVVLAPSTKSEKKVRNILEGLCGSSNSNNYWKQDDDVGVAGLGGDTESHPYVSFTINFV	635474	1.18454e+06	1.16667e+06	948829	983880	1.01632e+06	929402	974738	966014	971617	513396	556473	591166	850046	627770	517106	512131	337189	353656	430020	483786	547125	450343	459122	485094
Bradi2g14580.1	2.23338e-05	8.22263e-05	0.0184448	7.46403e-05	1.06992e-05	0.000191464	1.06992e-05	0.711072	0.383729	0.711072	0.445198	0.383729	0.456698	MGGGDASGLGAGPEREQEEEQARKRAAAAGYDYEGDARWAEYWSNVLVPPHLASRPDVVGHLQRKFYQRYIDRDLVVEPMSSIGSTQASRPEVRSSSSASSESVRPRNSGSSSRSAAPPPPPPQTDRAANPLRFDARTIHFSINAWVLVVAGLGMLPILPKHLADRACKLSLLGTILSSGYSLYSTYGKPRALNMQAIQGWLNSVLGTKDFIHLMFSLLLFTSQLHLKIAALPVFCWALDHVARFLRRNFTHSSFYRAYLEEPCLWVETNNTTLSLLSSNAELALGFLLIISLFSYSTSAFLRITNIIFRPSSLHLMSYTLLSCRWRRNIIQTFMYWNLLKLMYRAPVTSSYHQSTWAKIGRTVNPYIHRYAPFLQTPISTIQRWWLR	20431.3	24500.8	23737.7	16060	21182.4	9751.57	15584.6	16179.3	18733.5	15062.2	8414.08	8497.6	10156.4	10653.4	9430.38	6761.95	8494.15	8676.85	8580.33	8128.32	7378.39	10493.8	8665.22	12158.5	9673.97
Bradi2g15367.1	0.000254642	0.000639687	0.913168	0.022113	0.00121738	0.000341215	0.000341215	0.893254	0.136805	0.893254	0.482072	0.248237	0.136805	MHREISDMVYFLDEARVYDRMPVTMAMADAVNDTSAPTTKRLTISFEETETTQWDATLELTLGYTATMKVGFPKLGLGAQAELSAEFFGSYNWGETVVTTVKKAVEYEVTVPPRTKVSVRVMATKATCDVPFGYIQKDTFTDGRVETRRKQDGIFTGVNSYNFQFHATEMPLEQRLIMQQHAS	6548.45	18847.9	14671.7	10236.5	12576.1	9188.37	11418.5	9905.13	14422.7	11233.7	6458.05	3494.69	5529.78	8767.94	6062.61	4109.64	1721.38	1255.61	5400.85	3121.87	2567.18	844.471	1669.97	1800.29	1720.48
Bradi2g15630.1	0.00869391	0.0138794	0.925529	0.130864	0.0195675	0.940733	0.0195675	2.02008	0.804849	0.804849	1.69822	2.02008	1.18177	MLVRLGFVVVASVAAFTLKRGRGPNKDNGQARKRKDKARSSEHGEKEEEKEEVKTISGIINSVEDDDDDMFSEIESLLSGEIDIPIPSDRFDVKERSRYNAHMANNGAEMERLRGLVRELEEREVKLEGELLEYYGLKEQETDVTELQKQLKIKTVEVDMLNITISSLQAERKKLQDDVVRGAATKKELEASRSRIRELQRQIQMEANQTKGQLMLLKQQVMGLKAKEEEVAKKDAEIEQKLKKLKELEVEVLELRRKNKELLYEKRDLIVKLDAAQGKITESDVVAHAREEISNLRHTNEDLTKQVEGLQMNRFSEVEELVYLRWVNACLRFELRNYQTPSGKISARDLNRTLSPKSQARAKQLMLEYGSERGQGDTDLDSASSAPSSPRSEDFDTVS…	4322.94	3103	3502.91	2266.48	3298.83	3245.49	4213.91	1579.28	1581.56	2655.06	7713.1	7038.37	4062.38	3594.77	5602.16	5791.45	8128.38	7017.38	5718.36	6663.89	4279.78	1917.69	3415.27	5981.13	3898.47
Bradi2g15710.1	0.0696131	0.0868715	0.243363	0.0278175	0.135372	0.0655145	0.0278175	0.714728	0.529154	0.714728	0.529154	0.66024	0.598013	MASLAPATPAKPIGLLPCPIRGGGIGSARPGLATAAPRLRVSASASASDVPDFLSSDWLETRKKKPLGPRLNYNAEEAVEYQLEALKYNDRPRQDYGIEVMYRFAGFDPFERSTYFGRQFDLGQFERFRRIFHHSTYRVLLAHKERKILSSLWVEENQYKQRVWVRGARPEEEEIFQFTMIQRVGGSWDGYWLTESLTNDDGDTFSGGVAY	10020.9	8684.1	17538.9	14353.3	12649.3	4963.72	9829.63	8502.23	12867.6	9040.81	7483.42	9102.72	5230.96	4956.6	6693.42	10305.9	6705.45	8424.72	7970.23	8351.57	4935.63	6472.76	8680.13	10169.2	7564.44
Bradi2g15730.1	0.00291578	0.00539559	0.0077349	0.00189313	0.00200281	0.0126746	0.00189313	0.806773	0.755128	0.793059	0.755432	0.755128	0.806773	MALPNQGTVDYPSFKLVIVGDGGTGKTTFVKRHLTGEFEKKYEPTIGVEVHPLDFTTNCGKIRFYCWDTAGQEKFGGLRDGYYIHGQCAIIMFDVTSRLTYKNVPTWHRDLCRVCENIPIVLCGNKVDVKNRQVKAKQVTFHRKKNLQYYEISAKSNYNFEKPFLYLARKLAGDANIHFVEAVALKPPEIVLDLAMQQQHEAELAAAAAQPLPDDDDDLVE	119572	136972	147563	123517	131906	102686	110531	102143	103077	104609	92946.8	110507	87596.7	107534	99646.2	95898.7	111545	98283.7	92696.5	99606	95003.6	103001	125809	101859	106418
Bradi2g15740.1	0.000559753	0.00127122	0.999996	0.0496957	0.00205776	0.00299548	0.00205776	1.0074	0.317426	1.0074	0.570889	0.317426	0.34856	MRSSLLRSASQHLRRRGYASAAGGQPERKVAILGAAGGIGQPLALLMKLNPLVSSLSLYDIAATPGVAADVSHINSPALVKGFVGDDQLGEALEGADLVIIPAGVPRKPGMTRDDLFKINAGIVKGLCTAISKYCPNALVNMISNPVNSTVPIAAEVFKKAGTYDEKKLFGVTTLDVVRAKTFYAGKANVPVTGVNVPVVGGHAGITILPLFSQATPSSNALSHEDLKALTKRTQDGGTEVVEAKAGKGSATLSMAYAGAVFGDACLKGLNGVPDIIECSFVQSTVTDLPFFASKVRLGKNGVEEVIGLGELSAFEKEGLESLKGELMSSIEKGIKFAQEN	67444.1	179615	105522	89751.2	110583	102625	122014	109998	110968	111401	52855.2	45154.4	79709.4	74803.6	63130.7	29690.5	23461.1	53215.1	34041.3	35102	31424.5	52754.1	44314.9	25685.7	38544.8
Bradi2g16070.1	0.000123698	0.000340549	0.0791673	0.00163565	0.000238286	5.6607e-05	5.6607e-05	0.703551	0.270218	0.703551	0.464682	0.35217	0.270218	MNGNSSSRGGGGYESGSDQDGGMRKPLLVNTGSWYRMGMGSRQSSLTAGTSSMAVMRESHVSAFLCTLIVALGPIQFGFTGGFSSPTQDAIIRDLNLSISEFSVFGSLSNVGAMVGAIASGQMAEYIGRKGSLMIAAIPNIIGWLAISFAKDSSFLYMGRLLEGFGVGVISYTVPVYIAEISPQNMRGALGSVNQLSVTIGILLAYLLGMFVPWRMLAVIGILPCTILIPGLFFIPESPRWLAKMNKMEDFETSLQVLRGFETDITSEVNDIKRAVTSANKRTTIRFHELNQKKFRTPLTLGIGLLVLQQLSGINAILFYASSIFKAAGLTNSDLATCALGAIQVVATGVTTWLLDRAGRRILLIISSAGMTLSLLAVAVVFFFKDNVSQDSHMYYILS…	29492.2	38097.1	46596.9	23055.5	34310.4	27419.5	22734.8	18284.5	28117.6	24139.1	14246.3	14681.1	13658.4	21187.9	15943.4	17515.8	14152.8	10500.4	6163.53	12083.1	9771.65	10208.1	11214.5	5890.77	9271.27
Bradi2g16160.1	0.208433	0.231802	0.82714	0.996842	0.412969	0.231253	0.231253	1.97691	0.866838	1.4295	0.866838	1.77351	1.97691	MGTRRVVLVLFAAVLLQALLPASEAEGLVRIALKKRPIDQNNRVATRLSGEEGQHLGGANSLGSEDEGDIVALQNYMNAQYFGEIGVGTPPQKFTVIFDTGSSNLWVPSAKCYFSIACYFHSRYKAGQSSTYKKNGKPAAIQYGTGSIAGYFSEDSVTVGDLVVKDQEFIEATKEPGVTFMVAKFDGILGLGFQEISVGKAVPVWYKMIEQGLISDPVFSFWFNRHAGEGEGGEIVFGGMDPKHYIGEHTYVPVTQKGYWQFDMGDVLVGGKSTGFCAGGCAAIADSGTSLLAGPTAIITEINEKIGAAGVVSQECKTVVSQYGQQILDLLLAETQPKKICSQVGLCTFDGTRGVSAGIRSVVDDEAEKSNGLHSDPMCNACEMAVVWMQNQLSQNKTQ…	38235.4	29509.2	27665	34646	32513.9	27004.9	49633.6	60624.9	48651.5	46478.7	30425.8	38978.8	34966.7	8365.78	28184.3	28663	62826.9	63788.4	75376.9	57663.8	87143.6	114121	10597.3	45245.2	64276.9
Bradi2g16430.1	8.76529e-09	2.02789e-07	4.36588e-05	2.81315e-09	1.73805e-12	3.72947e-10	1.73805e-12	0.708393	0.395739	0.708393	0.523802	0.395739	0.445736	MVAHRFHQYQVVGRALPTPGDEQPKIYRMKLWATNEVRAKSKFWYFLRKLKKVKKSNGQMLAINEIFEKNPTTIKNYGIWLRYQSRTGYHNMYKEYRDTTLNGAVEQMYTEMASRHRVRSPCIQIIKTATVHFSLCKRDNTKQFHNSKIKFPLVYQKVRPPTRKLKTTYKATRPNLFM	206151	216518	195908	166516	196273	121411	138346	145276	151122	139039	103935	113071	89544.4	104683	102808	78704.8	79364.8	75253.9	77368.7	77673	102505	76397.7	84565.5	86476.1	87486
Bradi2g16480.1	0.000845541	0.00182794	0.936423	0.999988	0.00533333	0.0194183	0.00533333	2.28886	0.805136	0.805136	1.02059	2.28886	2.06648	MAYRAEDDYDYLFKVVLIGDSGVGKSNLLTRFTRNEFSLESKSTIGVEFATRSIHVDDKVVKAQIWDTAGQERYRAITSAYYRGAVGALVVYDVTRHVTFENVERWLRELKDHTDANIVIMLVGNKADLRHLRAVQSEDAKAFAERENTFFMETSALEAMNVEDAFTEVLSQIYRVVSKKALDIGDDPAAPPKGKTISVGSKDDVSAVKKSACCSS	12647.5	12355.7	13022.6	12644.7	12667.6	7204.89	10420	10607.2	12564.5	10199.2	13951.8	14595.3	10862.9	12303.6	12928.4	32766.2	25809.9	25707.3	31694.2	28994.4	18513.2	18310.8	44534.2	23351.5	26177.4
Bradi2g16500.1	0.0363463	0.0488845	0.488546	0.0330395	0.0379096	0.0402273	0.0330395	0.76149	0.479664	0.76149	0.479664	0.492389	0.497884	MERVMKDDTIQEKGERARMASFVGAMAIADLVKTTLGPKGMDKILQSTGRGRSVTVTNDGATILKSLHIDNPAAKVLVDISKVQDDEVGDGTTSVVVLAGELLREAEKLVNMKIHPMTIIAGYRMAAECARNALLQRTMDNKGNTDKFRSDLMNIAMTTLSSKILSQDKEYFAELAVDAVLRLKGSTNLESIQILKKPGGSLKDSFLDEGFILDKKIGLGQPKRIENANILVANTAMDTDKVKIYGARVRVDSMTKVADIEAAEKQKMREKVQKIIAHGINCFVNRQLIYNFPEELFADAGILAVEHADFEGIERLALVTGGDIASTFDNPESVKLGHCKLIEEIMIGEDRLIHFSGVAMGQACTIVLRGASEHVLDEAERSLHDALCVLSQTVNDTRV…	39980.1	50931.5	46767.3	46111.9	45947.7	24040.9	33889.7	41829.9	40194.4	34988.7	24333.8	32942.3	23924.4	6957.38	22039.5	21427.1	7290.81	28580.4	33198.3	22624.1	28710.3	45691.2	11509	5595.91	22876.6
Bradi2g16560.1	3.29475e-06	1.89547e-05	0.100367	0.659494	0.000222512	0.00296378	0.000222512	1.13761	0.642628	1.13761	0.936472	0.642628	0.755168	MAPPSRVLLLAALFLAASTMATAQKAKAKPAPAAADGPGAAAADAGPPTNVTSVLEKSGKYGTFLRLLHETRVDTQLNSQLYDSYNGLTILAPTDAAFEDLPSGTMNGLSSQDQIQMMLYCVLPRFYSLSMLGTLNGKVSTQASGSDGPYEYKIKPSGSNVNVSTGVKGNNMLLSTIVSKEFPLAVYSVDKVPLPYALFGPQPPTPAPAPAPAPSKSKSKKKKKVIADPPESDSDDSTASDTKSAAAARVSASRWVAAAALAVLGAAGGVLL	1.33244e+06	1.26046e+06	1.69618e+06	1.46203e+06	1.43778e+06	1.63257e+06	1.5829e+06	1.61394e+06	1.71313e+06	1.63563e+06	1.3602e+06	1.27628e+06	1.26956e+06	1.47972e+06	1.34644e+06	918153	855197	949935	972541	923956	1.2421e+06	910459	1.11917e+06	1.07133e+06	1.08576e+06
Bradi2g16570.1	1.16216e-07	1.47901e-06	0.0207243	0.527982	3.23781e-05	1.47362e-05	1.47362e-05	1.25096	0.454456	1.25096	0.898501	0.454456	0.48578	MATARSVLVAVLLSLALPAVLSQKPAAAPAPSPASTAPNVTAVLDKAGQYTKFMRLMKSTQQDTQLNSQLNGSDTGFTVFAPTDNAFDSLKAGTLNSLSQQEQVSLVQAHIVPAFFSMESFETASNPVRTQASGADGPYTVNVTATSNGQVNVSTGLVSTMVGTALRKEKPLAVYSVDKVLLPYDLFGPKPPASAPPAPGKKAPAKGGAKAPAGEEDSAPASKASGGVVGFAWSFLAAVAAACLL	386971	597485	537429	534485	514092	647783	603254	616628	704770	643109	406554	413712	479246	548139	461913	252711	211694	212074	258051	233632	271072	194540	271988	261344	249736
Bradi2g16770.1	0.31886	0.343563	0.391123	0.616447	0.140012	0.806772	0.140012	0.831003	0.572157	0.700273	0.772643	0.572157	0.831003	MANSNLPRRIIKETQRLLSEPAPGISASPSEENMRYFNVMVLGPAQSPYEGGVFKLELFLPEEYPMAAPKVRFLTKIYHPNIDKLGRICLDILKDKWSPALQIRTVLLSIQALLSAPNPDDPLSENVAKHWKSNEAEAVETAKEWTRLYASGA	20854.6	27344.9	55895.5	53167	39315.5	18813.9	35929	23673.3	31710	27531.6	20463.1	44187.9	27855	29001.3	30376.8	27331.1	17588.2	19449.2	25610	22494.6	23497.9	24125.4	42608.2	40453.7	32671.3
Bradi2g17040.1	0.000642055	0.00142691	0.0181057	0.0319751	0.000442039	0.000313914	0.000313914	0.645688	0.367605	0.611852	0.645688	0.394527	0.367605	MTKRTKKAGIVGKYGTRYGASLRKQIKKMEVSQHSKYFCEFCGKFAVKRKAVGIWGCKDCGKVKAGGAYTMNTASAVTVRSTIRRLREQTEA	9623.61	11051.7	17904.6	13702.5	13070.6	5629.09	8702.92	7543.19	10113.9	7997.26	9953.22	9157.3	5990.4	8657.17	8439.52	5028.85	7761.87	3644.11	4191.98	5156.7	3425.92	5014.52	4560.85	6217.96	4804.81
Bradi2g17090.1	0.0856839	0.104984	0.303119	0.999404	0.0570142	0.352977	0.0570142	0.986242	0.779352	0.859424	0.986242	0.779352	0.867949	MENLISLVNKLQRACTALGDHGEDSALPTLWDSLPAIAVVGGQSSGKSSVLESVVGKDFLPRGSGIVTRRPLVLQLHRIDGDREYAEFMHLPRKRFTDFALVRKEIADETDRETGRSKQISSVPIHLSIFSPNVVNLTLIDLPGLTKVAVEGQSEGIVQDIENMVRAFIEKPNCIILAVSPANQDLATSDAIKISREVDPKGERTFGVLTKIDLMDKGTDAVDILEGRSYRLQFPWIGVVNRSQQDINKNVDMIAARRREREYFATTPEYKHLAHRMGSEHLGKSLSKHLESVIKSRIPGLQSLITKTIAELETELKRLGKPIANDAGGKLYTIMEICRMFDGIYKEHLDGVRPGGEKVYHVFDNQFPVAIKRLQFDKQLSMENVRKLITEADGYQPHL…	336081	370516	363407	346950	354238	279123	341133	294043	303465	304441	361212	383218	344790	308238	349365	218500	200996	357208	327601	276076	320843	269754	324943	314304	307461
Bradi2g17272.1	5.23848e-08	7.51777e-07	0.0278909	0.0128636	6.66367e-09	3.33897e-06	6.66367e-09	1.77596	1.19838	1.19838	1.22448	1.77596	1.49655	MTVIDILTRVDAICQKYDKYDVDKLNGANVAGEDPFARLYGSVDAEISQCVEKAELAKQEKNRAAVVALNAEIRRTKAKLLEEDLPKLQRLALKKVKGLTREELATRTDLVTALPDRIQSIPDGSATATKKNGTWGGASGSRTGGGIKFDSTSDGNFDDEYFKGTEESNKFRQEYEMRRMKQDEGLDVIGEGLATLKNMASDMNEELDRQVPLMDEMDDKVDRANADLKNTNVRLKQTILQMRSSRNFCIDIILLCVILGIAAYLYNVLKK	198664	204231	248712	222012	218405	274878	272700	254251	245099	261732	254920	276512	270160	268136	267432	383693	356951	376650	434223	387879	340751	319553	334061	313056	326855
Bradi2g17290.1	0.00201097	0.00389211	0.94959	0.0538442	0.00810304	0.0021822	0.0021822	0.914528	0.329191	0.914528	0.57978	0.429205	0.329191	MATRRALSSLLRSASRVRGASPSPLPRAAPHRPSPAGYLFNRAAAYATSAAAQSKPTTTPPPTSAGKTGPGKITDEFTGAGAVGQVCQVIGAVVDVRFDEGLPPILTALEVLDNSIRLVLEVAQHLGENVVRTIAMDGTEGLVRGQRVLNTGSPITVPVGRATLGRIINVIGEPIDERGDIKTNHFLPIHREAPAFVEQATEQQILVTGIKVVDLLAPYQRGGKIGLFGGAGVGKTVLIMELINNVAKAHGGFSVFAGVGERTREGNDLYREMIESGVIKLGDKQSESKCALVYGQMNEPPGARARVGLTGLTVAEHFRDAEGQDVLLFIDNIFRFTQANSEVSALLGRIPSAVGYQPTLATDLGGLQERITTTKKGSITSVQAIYVPADDLTDPAPAT…	311181	615784	325111	241431	373377	316062	355945	336971	356876	341464	192102	150662	270815	252326	216476	144722	90419.9	194973	210906	160255	100274	123903	125210	142261	122912
Bradi2g17600.1	0.0660452	0.0829008	0.995468	0.975991	0.128197	0.0759266	0.0759266	0.973819	0.765383	0.973819	0.95881	0.792547	0.765383	MPAPAAPAIRLGAPHPYLKTHGAKVARLHLLDWVVLVLLAVADGVLNLIEPFHRFVGQDMMADLRFPLKDNTVPVWAVPVLAVLGPMLIIAAIYVKRRNAYDLHHAILGLLFSVLITGVITDAIKDGVGRPRPNFFWRCFPDGVPKYNNFTGQVICHGDKGVIKEGHKSFPSGHTSWSFAGLGFLSWYLAGKIRAFDRGGHIAKLCIVILPLLLAAMVGVSRVDDYWHHWQDVFTGGILGLVVASFCYLQFFPPPSGDQGLWPHAYFHHILSPEAENQVQSIIPPANGDSPRRHAALELRTTSQLELDSMEAGSRDR	9501.24	7645.55	8837.52	8718.93	8675.81	10604.2	9295.93	6328.2	7566.32	8448.66	7738.87	8414.61	9252.59	7867.74	8318.45	8298.98	7801.09	5848.9	5554.95	6875.98	7033.35	6313.69	6681.21	6533.02	6640.32
Bradi2g17670.1	0.0339265	0.0460432	1	0.141315	0.40027	0.997457	0.141315	1.23056	0.839772	1.0011	1.23056	0.839772	0.974323	MASMQSWRKAYGAIKDTTTVSLANLNSDFKDLDVAIVKATNHVECPPKERHLRKIAAATSIARPRADIAYCIHALSRRLNKTRNWIVALKTLVVVHRLIREGDPTFREELLNFTQRGRILQLSNFKDDSSPVALDCSAWVRTYGQFLEERLECFRVLKYDVEAERLSKQGQGPEKGHSRTRELNTQDLLEQLPALQQLLYRLVGCRPEGAANNNYLVQYALALVLKESFKIYCAINDGIINLVDKFFEMARHEALKALEIYRRAGQQAGSLSDFYENCRGLELARNFQFPTLREPPQTFLVTMEEYVRDAPRMVPVREPLEFPERLLLTYKPDESEDVSAPDPVEEESPPVEESVPVQPVTEAVSPPSKNDVAVVDTGDLLGLNDPSPGVSAIEESNAL…	155617	135109	179450	141904	153020	141159	193464	133933	144200	153189	170944	224949	191969	165338	188300	121147	98103.8	162244	132514	128502	161543	139525	153711	141584	149091
Bradi2g17680.1	1.57189e-10	1.17805e-08	0.998758	0.993255	1.14997e-12	2.5735e-11	1.14997e-12	5.63405	1.0696	1.0696	1.10819	5.63405	5.33225	METPAVIAVVENGFVGVERKVQKSYWEEHSRDLTVESMMLDSRAKDLDKEERPEVLSILPSYEGKTVLELGAGIGRFTGELAKEAGHVLALDFIDSVIKKNEEINGHIHNNITFMCADVTSPELKIEDNSIDLVFSNWLLMYLSDEEVEKLIGRIVKWLKVGGHIFIRESCFHQSGDSKRKVNPTHYREPRFYTKIFKECSSYDQEGNSFELSLVTSKCIGAYVKSKKNQNQICWLWEKVKSTDDKGFQRFLDNVQYKSSGILRYERVFGEGYVSTGGFETTKEFVDKLDLKPGQKVLDVGCGIGGGDFYMSETYDVHVLGIDLSINMVSFAIERAIGRKCSVEFEVADCTTKEYPENTFDVIYSRDTILHIQDKPALFRNFFKWLKPGGKVLISDYCR…	30560	40575	46399.5	41526.1	39765.2	51965.3	47931.4	27562.7	42672.2	42532.9	46001	42736.7	31246.9	56284.3	44067.2	250444	214905	205834	224972	224039	182295	179865	240435	245557	212038
Bradi2g17710.1	0.0646227	0.0814729	0.28432	0.0431329	0.983925	0.991089	0.0431329	0.915189	0.289894	0.560534	0.289894	0.900373	0.915189	MGETITATAVKGGYQEKENGTEKKLAKVGKVPLHDLFKNADAMDVVLMLVGTVGAIAAGMSQVVMTIVFGRMVDAFGGATPSTVLPRVNRVVLEFVYLGIGTLPACFLQISCWTVTGERQANRIRSLYLESVLTQDMEFFDTETKGGQVVSGICADTIVIQEAMGEKVGKFLHLFTTFLGGFVVAFIKGWLLTLVMLSTIPPIIFAAGIVSKMMSKVSSEGLESYSDAGDIVEQTIGSIKTVASFNGEKKAMTLYNNYIKKAYKGTVKEGTIQGFGMGFLTFATFSGIGLILWYGSKLTLSGGYSGADIMSILFCVMIAARSLGDATPCIAAFEEGRVAAYRLFTTINRKPKIDYDDTTSVVLEDIKGDIELRDVFFSYPSRPEQLIFAGFSMHVSTGT…	324595	160829	90821.9	102950	169799	65151.2	83836.1	123987	107738	95178.2	46792.4	31353.5	53672.1	65076.9	49223.7	129695	75556.7	209580	196698	152883	187804	189936	153780	90072.6	155398
Bradi2g17810.1	3.74353e-05	0.000128731	0.617731	0.00139966	4.69302e-05	8.58969e-05	4.69302e-05	0.827712	0.102315	0.827712	0.31937	0.102315	0.129312	MDANRRQSGIQQLLAAEQEAQQIVNAARAAKLARLRQAKEEAEREIAEYRAQMEAEFQRKVAESSGDSGANVKRLEQETNEKIAQLKQQAATISPEVIQMLLRHVTTVKN	16207.8	18900	13195.2	7369.06	13918	16155	8819.07	12863.5	8242.92	11520.1	3494.36	4720.82	2533	7031.85	4445.01	1535.01	2626.34	680.307	854.445	1424.02	2357.83	1389.74	789.445	2662.06	1799.77
Bradi2g17970.1	0.0113329	0.0174522	0.375755	0.978996	0.89855	0.0052891	0.0052891	1.61764	1.06771	1.24711	1.06771	1.10886	1.61764	MASALLQSYCSDADGRCHASSSPCTHATLLPGACPQEGTPSRRYIKPSGASPREQVVPWAWPLLHTTPRGEALGAQTSSLAGVRLPPVSPGPTQPPAELCHGVVLYQRVLSCLSSSSWRPIEAPLPLLPVSPGGRSSPGCNKAGPRGIIHGYPGYRGCDKEPSRSFSNRQAVWCGSLSLSYLGFQSRSICLPGVIAFAVFEWGADPGFPPAMVKETVYYDTLGVSVDASPAEIKKAYYVKAKLVHPDKNPGNPDAAVKFQELGEAYQVLSDPAKKEAYDKHGKDGLAQDNMVDPAAVFGMLFGSDYFEDYVGQLALASIASVEIDEGSSNQEARAKVQEKIKELQKEREQKLIQSLKDRLQPYVDGRKDEFVEWANAEARRLSQAAFGEAMLHTVGYIY…	87990.5	92149	141269	172034	123361	108585	157727	169316	179748	153844	113090	148586	125628	139548	131713	144447	137866	121299	143547	136790	157970	200678	228538	211027	199553
Bradi2g18070.1	0.00471641	0.00816744	0.920156	0.029359	0.354291	0.951706	0.029359	1.45331	0.760335	1.0951	1.45331	0.760335	0.918607	MAGLQRSSGTFRRSGSSGLVWEWDDKHLSGEIRPAAAARRGVSLDGRAAGAPEARGLDRSRSSGHGGAARAPEAAAPVRVERSRSSGHRTGAGRVPPPLDPPSPRVALCGGGFCGFFRGKGGGRKKKTKNDARKAKGKGRRH	13938.2	13244.6	9902.43	7802.01	11221.8	16481.9	11565.7	10605.2	10503.4	12289.1	14908.3	16257.7	13969.6	20099.5	16308.8	10702.5	9389.03	7209.08	6828.73	8532.34	9814.33	8807	11900	10712.4	10308.4
Bradi2g18200.1	0.0215873	0.0305844	0.999986	0.999931	0.0247149	0.259313	0.0247149	2.5508	0.967787	0.967787	1.04822	2.5508	1.90109	MDGFGWSTQQTPPGAASCPKDDALLAAFLGGASTTFELLHSAAAGISDDAYGHELPPSCQDDDILRRLLRCRDSVNSPLPSAVDVPSKAAILHNSAGSLRAPAPPIGQHDSSFAFFPNAGDAFSGHSTATGNISSGDSNTHDAEVASPPCIVPATRTTTGTEAMAQAKQEAIIYRAAAAAYSSSPAAAAGADPPLGPRRRRRNVRISSEPQTVAARLRREKVSERLRALRRLVPGGGSGKMDTASMLHQAACYLSFLKAQLARFQAMAAADGRASYSSNSSSMQRYDNPPESLGGGNIGNGGAVLSFRRDDSVDGYVRGNNWNMQSL	52468.6	18751	34198.3	46422.7	37960.2	26786.7	39755	24076.7	56331	36737.3	23691.2	69254.5	38003.7	28212.4	39790.5	50320.4	116149	80987.3	139859	96828.9	30756.3	95923	105923	56059.6	72165.6
Bradi2g18330.1	1.90271e-06	1.27067e-05	0.274554	0.00110792	2.00614e-06	6.54081e-06	2.00614e-06	0.910894	0.589875	0.910894	0.765556	0.622008	0.589875	MSEEGKDALDLSAISAAVPNAAELSAEDKANLVESIKNTLQGLAAQHSDVLENLEPKVRKRVEALREIQSQHDELEAKFFEERAALEAKYLKMYEPLYSKRYEVVNGVVEVEGVTKDEAAVTAADQKEEKGVPDFWLNAMKNHEILAEEIQERDEEALKYLKDIKWYRINEPKGFKLEFHFDTNPFFKNSVLTKTYHMIDEDEPILEKAIGTEIEWYPGKCLTQKVLKKKPKKGSKNTKPITKTEMCDSFFNFFTPPQVPDDDEEIDEDTAEQLQNQMEQDYDIGSTIRDKIIPHAVSWFTGEAAQDEDFDGIMDGEDDDDEDDDEDEDEDEDDEEDEDDEGDKKKGGRVPAGEGQQGERPAECKQQ	225600	240649	261616	199310	231794	198621	204811	224138	216989	211140	160536	189811	161138	198319	177451	138545	154357	150813	132995	144177	131839	132386	150078	132615	136729
Bradi2g18550.1	0.0416229	0.0549955	0.995791	0.898316	0.147478	0.165536	0.147478	1.0934	0.707251	0.962399	1.0934	0.707251	0.71633	MSRLLSRRHLAAAAGVRRPLTAFASRWLHTPAFATVSPEEISGSSPAEVQNFVQGKWIASANSSWIVDPLNGDKFIKVAEIQGSEIKPFVESLSNCPKHGLHNPLRAPERYLMYGDISAKAAHVLGQPEVLDFFAKLVQRVSPKSYQQALAEVQVSQKFLENFCGDQVRFLARSFAVPGNHLGQISNGYRWPYGPVAIITPFNFPLEIPLLQLMGALYMGNKPVLKVDSKVSIVMEQMIRLLHECGLPAEDVDFINSDGITMNKLLLEANPKMTLFTGSSRVAEKLAADLQGRIKLEDAGFDWKILGPDVQEVDYISWVCDQDAYACSGQKCSAQSMLFMHKNWSSSGLLEKMKGLSERRRLEDLTIGPVLTVTTASMIEHMNNLLNIPGSKVLFGGEP…	2743.36	2795.4	2378.46	2252.04	2542.31	2881.13	2540.87	2252.19	2112.7	2446.72	2669.15	3511.07	2158.36	2780.5	2779.77	2353.22	1807.43	2286.16	745.404	1798.05	1780.29	1266.77	2182.64	2054.84	1821.14
Bradi2g18640.2	0.00680067	0.0111201	0.535889	0.178868	0.00248787	0.0220782	0.00248787	0.824155	0.414465	0.824155	0.720854	0.414465	0.565474	MGKSPAKWLKSVLFGKKTSKSGSTKGKDLSKAPGNRGYAATGKDPVFSESSPVISEPVLVTPHNNDTVPEVRKAENSSLQGEVVVPDVNQDLEKQSTVGSDVLSNDPERLREEQAAVKAQAAFRGYLARRAFRALKGIIRLQALIRGHLVRRQAASTLRATWLIVKFQAVVRGRNVRLSSDAVQFRWNLVQQNSMGAKPDAWKERLASNAFARKLLASPILVEALHFQYDERDPNSAFNWLERWTISRVWKPVYQPKRSAASDAKAQTRKASYAMETESGKLKRNARKSSAMSVEPAPTNMPLETEKPRRNQRKFTSIPADSVPDSQLTELEKVKRSLRKVTNSMAEASKVSSPATEISDYPEVQFEKPVRTAQEVPVYPEIQEPYNGDLLENAKMDIP…	18761.5	16471.7	17002.7	12306.4	16135.6	11774.6	12820.9	13887.4	14709.9	13298.2	8683.18	9149.59	14300.9	14391.9	11631.4	7689.78	4211.99	9177.97	5670.78	6687.63	16683.5	6762.56	7331.49	5719.54	9124.26
Bradi2g19030.1	0.877676	0.882254	0.859096	1	0.997018	1	0.859096	1.02681	0.918522	0.918522	0.999639	1.02681	0.998114	MGCAGSKPRVDESGKKLRKPKPWKHTQPLTPAQLKQMRDEFWDTAPHYGGQKEIWDALRAATEADLPLAQTIVDSAGVIVSNSDLTLCYDERGAKYELPKYVLSEPTNLIPVG	11688.7	8913.99	9717.21	10107.8	10106.9	10091.6	9596.95	7814.09	9631	9283.42	10524.1	12822	7485.56	9581.4	10103.3	10953.9	11915.5	9248.94	9393.36	10377.9	9798.4	8209.93	12257.2	10085.9	10087.9
Bradi2g19230.1	0.000117541	0.000326932	0.0637537	0.00281401	4.1861e-05	0.000554819	4.1861e-05	0.83292	0.57752	0.83292	0.729516	0.57752	0.683868	MAEHKEESVMDKISEKLHGGSSSGSDDESSSAAAAVKAKIYRLFGREKPVHSVLGGGKPADLFLWRNKKISGGVLAGATAIWLLFEVMEYHLLTLLCHCFILTLGILFLWSNASAFINKSPPNIPEVRIPEDLAVNVARSLRYEINRGFASLRDIGQGRDLKKFLIVIAGLWTLSALGSSCNFLTLFYIVFMVLYTVPVLYEKYEDKIDAYGEKAMIELKKYYAIFDEKCLSKIPKGPSKDKKH	140692	142600	160821	121618	141433	90350.3	117587	123930	139342	117802	91621.7	110554	106263	104271	103178	81240.3	87442.2	77085.6	80953.3	81680.3	101048	106141	91123.2	88573.7	96721.4
Bradi2g19570.1	9.59395e-05	0.000279429	0.964954	0.0118217	0.999929	0.000355937	0.000355937	1.59039	0.943582	0.943582	1.39827	0.988879	1.59039	MAGRNYQGQGGGGGGATASMAVVSTPSQELALTNCAYVSPADIRRFPNALALVGDVLVFALRYPFFIALNAIQRRQAKVSAGDSITVSSFAPPDDFKLALVTLELEYTKARSNRAEDLDAVLLAQQLRKRFLDQVMTTGQRVPFEFYGTNYIFTVNQALLEGQESSTPLDRGFLSSDTYIIFEAAPNSGIKVINQKEAASSKLFKHKEFNLEKLGIGGLSSEFTDIFRRAFASRVFPPHVVSKLGIKHVKGILLYGPPGTGKTLMARQIGKLLNGKDPKIVNGPEVLSKFVGETEKNVRDLFADAENDQKAQGDHSDLHVIIFDEIDAICKSRGSSRDGTGVHDSIVNQLLTKIDGVEALNNVLLIGMTNRKDLLDEALLRPGRLEVHIEINLPDENGR…	8290.59	7125.77	6383.95	4746.7	6636.75	6755.48	6097.61	5096.98	7099.2	6262.32	7896.35	9891.63	9266.94	10065	9279.98	5654.58	6417.89	7546.76	6632.56	6562.95	10655.5	8945.01	11509.3	11110.3	10555
Bradi2g19750.12	0.040314	0.0536856	0.971765	0.732424	0.849086	0.134668	0.134668	1.38241	0.829651	0.919552	0.829651	0.863623	1.38241	MASRRRTLLKVIILGDSGVGKTSLMNQYVNKKFSNQYKATIGADFLTKEVQFEDRLFTLQIWDTAGQERFQSLGVAFYRGADCCVLVYDVNSMKSFDNLNNWREEFLIQASPSDPDNFPFVLLGNKVDVDGGNSRVVSEKKAKAWCASKGNIPYFETSAKDGLNVEEAFQCIVKNALKNEPEEELYVPDTVDVAGGNRGQGSSGCC	22219.5	28702.2	36045.7	27262.1	28557.4	20991	29556.2	27395	27097.8	26260	20766.1	27006.4	19148.7	27849.4	23692.7	22073.1	34291.1	22144.7	20142.2	24662.8	32521.5	34818.7	57262.8	33308.8	39477.9
Bradi2g19750.2	0.00190656	0.0037167	0.425715	0.104698	0.00563446	0.000905888	0.000905888	0.850795	0.508976	0.850795	0.761013	0.605436	0.508976	MASRRRTLLKVIILGDSGVGKTSLMNQYVNKKFSNQYKATIGADFLTKEVQFEDRLFTLQIWDTAGQERFQSLGVAFYRGADCCVLVYDVNSMKSFDNLNNWREEFLIQASPSDPDNFPFVLLGNKVDVDGGNSRVVSEKKAKAWCASKGNIPYFETSAKDGLNVEEAFQCIVKNALKNEPEEELYVPDTVDVVGGNRGQGSSGCC	32489.3	46336	52826.8	44922.2	44143.6	37357.7	44982.3	26188.4	41700.1	37557.1	28346.4	41270.3	31005.8	33752.9	33593.8	26755.7	33598.5	26163.5	20386.8	26726.1	19064	23426.2	24066.5	23315.4	22468
Bradi2g20200.1	0.0066888	0.0109858	0.905198	0.111782	0.00684582	0.0133353	0.00684582	0.891983	0.394495	0.891983	0.62797	0.394495	0.448526	MDSARSWFQKFQPRDKSKSPAVPASHGKDPGKPPMDDAPSSATKQKVAAAKQYIENHYKTQMKSLQDRKERRWMLERKLQDAEVPVEEQNNILKHLEKKETEYMRLQRHKMGVEDFELLTIIGRGAFGEVRLCREKTSKSVYAMKKLKKSEMLRRGQVEHVKAERNLLAEVDSAYIVKLYYSFQDDEYLYLIMEYLPGGDMMTLLMRKDTLTEEEAKFYIAETVLAIESIHKHNYIHRDIKPDNLLLDLSGHLKLSDFGLCKPLDSSNFPNLNEPDYTSGKGAKPLPDNTSRLTNSSAPKRTQQEQLSHWQKNRRMLAYSTVGTPDYIAPEVLLKKGYGMECDWWSLGAIMYEMLVGYPPFYSEDPMSTCRKIVNWRSHLKFPEEAKLSPETKDLISKL…	10248.8	44463.1	34911.9	29911.6	29883.8	23927.3	28839.2	29432.3	24424.7	26655.9	18597.7	21553.5	18712.5	16200.8	18766.1	11332.9	7237.01	14294	14292.1	11789	12455.6	15378.5	11525	14255.7	13403.7
Bradi2g20440.1	0.000215224	0.000549881	0.0707308	0.00385862	0.00023564	0.000149583	0.000149583	0.74935	0.437496	0.74935	0.602789	0.460125	0.437496	MAAAAGAAAGAAEVIAIHSLEEWTIQIEEANNAKKLVVIDFTASWCPPCRAMAPIFADLAKKFPHVAFLKVDVDELKPIAEQFSVEAMPTFLFMKEGDVRDRVVGAMKDDLTAKLGLHAAQ	7215.61	8234.87	7992.12	4484.51	6981.78	5872.76	4269.58	5318.12	5466.73	5231.8	3329.64	4810.19	3706.16	4988.16	4208.54	3846.55	3124.6	3475.17	2403.64	3212.49	2444.91	3240.15	3643.64	2889.29	3054.5
Bradi2g20570.1	0.024629	0.0343229	0.894855	0.829805	0.948502	0.0640798	0.0640798	1.07862	0.749798	1.06643	1.07862	0.947013	0.749798	MAGKHGRNGFEDDDVNPFAGGSVPAASNARLSPLSHEPAGFYNVDIPMDSAKDVKKKEKELQAMEAELNKREKELKRKEEAASRAGIVIEEKNWPPLFPLIHHNISNEIPIHLQRMQYLAFSSFLGLTACLFWNIIATTTAWVKGEGVMIWLLAIIYFISGVPGAYVLWYRPLYNAMRTESALKFGWFFMFYMIHIIFCVWSAVSPPFPFKGNSLTGILPAIDVITKSAIVGIFYFVGFGLFCLESLLSIGVIQQVYMYFRGSGKAAEMKQQAARSALSSAF	75051.4	90995.3	116517	107771	97583.7	95707.9	109146	98930.1	112480	104066	90995.8	99339.8	102118	128571	105256	102284	90084.5	89865.7	87417.4	92413	88438.1	57347.1	77815.3	69071.8	73168.1
Bradi2g20680.1	9.55125e-05	0.000278888	0.0649532	0.000435146	0.000134673	0.000134769	0.000134673	0.681581	0.277467	0.681581	0.365526	0.294931	0.277467	MAATHPASPTAAGDKSSPSPPPPVRLATAVAAIQPSSPRFFFSSLAASSSPHRRIGIAVDLSDESAFAVKWAVQNYLRPGDAVVLLHVRPTSVLYGADWGSIPVSVDDDDGGEAPAGDEPEDARKKREEDFDTFTSTKSQDLAQPLVAAQIPFKIHIVKDHDMKERLCLEAERLGLSAMIMGSRGFGAFRRGDKGRLGSVSDYCVHHCVCPVVVVRYPDDAGAAGGAEAAGDELRTVPENEVVFHEAPEGQKEN	18387.4	28411.9	23482.1	12459.6	20685.3	13054.8	15017.8	13612.3	14709.8	14098.7	6956.12	6559.54	5888.11	10840.3	7561.01	9266.59	1673.36	6373.77	7089.23	6100.74	3862.15	6878.32	6557.97	5659.44	5739.47
Bradi2g20687.1	0.0815483	0.100099	0.854491	0.143113	0.998307	0.598655	0.143113	1.82786	0.703746	0.703746	1.82786	1.08322	1.45278	MASRSPRISFLLLPQLLSLLLLPWASHARDAISPGQPLRGNETLVSAGGGSFALGFFTPPGSNNTYLGVWYARVSVRTVVWVANRAAPIRGPLDHNARAALSVSADCTLAVSDSNSTIVWSAPPAAGLGLGRDCTARIQDDGNLVVVAAAAADGGEGERVSWQGFDHPTDTLLPGMRVGVDFESGTNMTLTAWASPSDPSPGPVVAVMDVSGDPEVFIWNGDEKVWRSGPWDGVQFTGVPDTATYSGFTFRFVNSDREVTYSFHLAPGATIVSRLALNSTGLLQRWTWVESANKWNMYWYAPKDQCDAVSPCGANGVCDTNALPVCACLRGFSPRQPDAWAMRENRAGCARATPLDCARAGNGNGTSDGFTVVPHAKVPDTTNATVDFGASLDQCRRLC…	3700	2005.98	3143.34	204.031	2263.34	1613.72	1332.21	160.049	3265.28	1592.82	3372.76	2472.92	5650.16	5052.44	4137.07	2932.9	1436.41	2768.63	2668.87	2451.7	4541.21	2239.2	3377.71	2994.44	3288.14
Bradi2g20710.2	0.0206724	0.0295101	0.981422	0.012373	0.696764	0.999693	0.012373	0.989379	0.738784	0.96891	0.738784	0.921798	0.989379	MAVKVYVVYYSMYGHVAKLADEIKKGASSVEGVEVKVWQVPEILSEEVLGKMGAPPKTDVPTITPQELAEADGVLFGFPTRFGMMASQMKAFFDATGGLWREQSLAGKPAGVFYSTGTQGGGQETTPLTAVTQLTHHGMVFVPVGYTFGAKLFDMDKVQGGSPYGAGTFAGDGSRWPTEMELEHAFHQGKYFAGITKKLKGSSA	1.08864e+06	1.23743e+06	1.30777e+06	1.25389e+06	1.22193e+06	1.05792e+06	1.16401e+06	1.24569e+06	1.26817e+06	1.18394e+06	824281	977690	878814	930196	902745	842978	1.41017e+06	1.10037e+06	1.15199e+06	1.12638e+06	1.19093e+06	1.32241e+06	1.23786e+06	1.08462e+06	1.20896e+06
Bradi2g21120.1	0.0682245	0.0853755	0.112226	0.0609013	0.0370439	0.445447	0.0370439	1.4686	1.23074	1.37214	1.42619	1.4686	1.23074	MASTAASPAALVAARRAASSAASPLRRAGLAAGCQPARSLAFAAGGGADPRLAIHVASRCRAASSARGTRAVATMAKKSVGDLGPADLEGKRVLVRADLNVPLDDSQNITDDTRIRAAIPTIKYLLSNGAKVILTSHLGRPKGVTPKFSLAPLVPRLSELLGIQVQKADDVIGPEVEKLVAALPNGAVLLLENVRFYKEEEKNEPEFAKKLAALADLYVNDAFGTAHRAHASTEGVTNFLKPSVAGFLLQKELDYLDGAVSNPKRPFAAIVGGSKVSSKIGVIESLLEKCDILLLGGGMIFTFYKAQGLSVGSSLVEEDKLELATSLLAKAKEKGVSLLLPSDVVIADKFAPDANSQTVAASAIPDGWMGLDIGPDSVATFNAALETTQTIIWNGPMGV…	577563	492572	770119	991050	707826	964072	1.18444e+06	879013	857424	971236	1.08189e+06	1.09919e+06	823653	1.03325e+06	1.00949e+06	1.18834e+06	1.226e+06	916533	827170	1.03951e+06	786681	855842	965428	876658	871152
Bradi2g21340.1	0.000997572	0.00209289	0.586288	0.860867	0.00134733	0.282534	0.00134733	1.1148	0.31537	0.818907	1.1148	0.31537	0.736791	MREILHIQGGQCGNQIGSKFWEVVCDEHGIDPTGRYVGTSDLQLERVNVYYNEASCGRFVPRAVLMDLEPGTMDSVRTGPYGQIFRPDNFVFGQSGAGNNWAKGHYTEGAELIDSVLDVVRKEAENCDCLQGFQVCHSLGGGTGSGMGTLLISKIREEYPDRMMLTFSVFPSPKVSDTVVEPYNATLSVHQLVENADECMVLDNEALYDICFRTLKLTTPSFGDLNHLISATMSGVTCCLRFPGQLNSDLRKLAVNLIPFPRLHFFMVGFAPLTSRGSQQYRSLTVPELTQQMWDSKNMMCAADPRHGRYLTASAMFRGKMSTKEVDEQMINVQNKNSSYFVEWIPNNVKSSVCDIAPRGLSMASTFIGNSTSIQEMFRRVSEQFTAMFRRKAFLHWYT…	14490.5	12150.4	22165.8	27412.9	19054.9	10749.6	14760.2	17439.2	19467.8	15604.2	21716.7	23352.2	20723.2	19177.4	21242.4	5485.15	4685.41	9228.32	4638.54	6009.35	15440.2	13112.2	17833.3	9772.13	14039.5
Bradi2g21510.1	2.58957e-06	1.59513e-05	0.35761	0.617456	6.32076e-05	0.000100536	6.32076e-05	1.67474	0.819933	0.819933	1.13091	1.67474	1.66001	MSSIGTGYDLSVTTFSPDGRVFQVEYAGKAVDNSGTIVGIKCKDGIVLGVEKLITSKMILEGSNRRLHSVHRNSGLAVAGLAADGRQIVSRAKSEAANYEKVYGEPMPVKELADRVASYVHLCTLYWWLRPFGCGVILGGYDRDGPQLYMIEPSGLSYKYFGAALGKGRQAAKTEIEKLKLSELTCREGIVEVAKIIYGVHDEAKDKSFELELSWVCDESNRQHEKVPNDLLEQAKAAAQAALEEMDAD	60732	61879.8	72354.5	55315.3	62570.4	45615.9	57216.5	47964.7	54417.2	51303.5	73161.3	70047.1	70483.4	69354.1	70761.5	104359	95768.3	103301	115727	104789	83043	93284.5	123643	115498	103867
Bradi2g21830.1	0.422313	0.446474	0.664394	0.741698	0.334469	0.237885	0.237885	0.615628	0.260517	0.568414	0.615628	0.349244	0.260517	MASSAAQLLLQWAAAAALAGLLLSSFSDAAHHVSVPPSPSPSRSPKSSSSFPPAASPPAVSPAPGPAAALDQACLNSLLNMSDCLPYVQAGAGGAAAKPDKACCPELAGLVDSNPVCLCELLSGAADSYGIAVDYARALALPKVCRVATPPVSTCAALGYNVRLGPSAAPGVSPSAEGPQFPGSSPFASPPAPRSHAAARRFPAAGNLVALAAVVALAVGVI	48534.8	14777.6	5973.59	1999.55	17821.4	16542	9966.92	3518.31	10492.5	10129.9	10101.9	5416.11	15102.5	13264.8	10971.3	7342.94	7255.45	8076.97	2220.69	6224.01	6693.4	6997.31	3465.95	1414.43	4642.77
Bradi2g21990.1	0.0634807	0.080183	0.28047	0.999703	0.494839	0.0392594	0.0392594	0.985302	0.69769	0.815401	0.985302	0.858231	0.69769	MEAATRRRALLLLVLVASSVPAGLCATNAQDVSALRSLMGQWSNVPSSWSATAGDPCGAAWDGLMCDANGRVTSLRLSSVNLQGTLSNSIGQLSQLMFLDLSFNIGLEGTMPASVGNLAQLTTLILAGCSFTGSIPQELGNLQKMTFLALNSNKFSGGIPASLGLLSKLFWLDLADNQLTGPVPISTATTPGLNLLTGTKHFHFNKNQLSGTLTGLFNSNMTLIHILFDSNQFSGSIPAEIGSISSLQVLRLDRNKLVGAVPNITNLVKLNELNLATNRLTGLLPDLSTMSVLNVVDLSKNAFDAQVAPNWFTTLTSLTSVSISSGKLSGVVPKALFTLPQLQEVVLDNNQFNGTLEISGSISKQLQTVDLRFNSIFDTATTSYKKALVLLGNPVCADA…	977558	778725	796685	547615	775146	603200	614932	508161	801927	632055	747192	613373	920848	773598	763753	691771	585823	746009	637413	665254	525259	563939	555217	518831	540812
Bradi2g22140.1	0.0986651	0.118716	0.966222	0.492382	0.080245	0.109039	0.080245	1.432	1.08466	1.08466	1.23433	1.432	1.40248	MASFGGVFWVVILVVMLPCLDVALGQSTDPSEVDALRAIKRSLLDPMNNLNNWNKGDPCTSNWTGVFCHKTNDAHLHVTELQLFKRNLSGTLAPEVSLLSQLKTLDFMWNNLTGSIPKEIGNITTLTLILLNGNQLSGFLPDEIGNLQHLNRLQVDQNQILGPIPKSFANLISVKHIHMNNNSLTGQIPAELFRLPALFHLLVDNNNLSGPLPPELGEAPSLKIFQADNNNFSGSSIPTTYNNISTLLKLSLRNCSLQGAIPDLSGISELGYLDLSWNKLTGSIPTNKLASNITTIDLSHNMLHGTVPTNFSGLPNLQLLSIEKNRLDGAVPSTIWNDIILTGNRSLVLDFQNNSLETILAVYNPPQSVTVMLYGNPVCGNSNGALIDNLCQPKSVNLQ…	13749.7	9044.63	14589.4	17017.1	13600.2	13480.5	20098.4	11060.5	14366.9	14751.6	18985.6	19178.2	14089.8	14895	16787.2	26309.5	16707.1	17997.9	16887.3	19475.5	18811.8	17050.9	19970.5	20463.1	19074.1
Bradi2g22180.1	0.000888971	0.00190655	0.878766	0.375671	0.012111	0.0397201	0.012111	1.37316	0.167866	0.825442	1.37316	0.167866	0.312859	MQHLRLIAFLSASLLFPLLPCTKGADLNSDKQALLAFAASLPHGKKINWTRTTQVCTSWVGVTCTPDGKRVRELRLPAIGLFGPIPSNILGKLDALQVLSLRSNRLTVGLPPDVASIPSLHSLYLQRNNLSGIIPTSLSSNLAFLDLSYNSFNGEIPLKVQNMTQLTGLLLQNNSLSGSIPDLQLTKLRYLDLSNNNFSGPIPPFLQKFPVNSFLGNSFLCGFPLEPCPGTTPPSPVSPSDKNNKNGFWNHTTIMIIIIAGGGVLLLILIIILLICIFKRKRDTEAGTASSSSKGKGVAGGRAEKSKQEFSSGVQEAERNKLVFYDGCSYNFDLEDLLRASAEVLGKGSYGTTYKAVLEDGTTVVVKRLKEVVAGKKDFEQQMEIIDRLGQDQSVVPLR…	7591.06	7748.05	13556.1	20213.8	12277.3	6416.37	14462.8	7687.99	11969.5	10134.2	13993	20331.3	19773.7	13336.5	16858.6	5985.61	711.205	1546.9	0.0373717	2060.94	440.848	714.44	9231.42	4977.52	3841.06
Bradi2g22200.1	0.0380585	0.050883	0.952858	0.43842	0.991643	0.167607	0.167607	1.71634	0.501997	0.813995	0.501997	0.885623	1.71634	MASKRILKELKDLQKDPPTSCSAGPAGEDMFHWQATIMGPPDSPYAGGVFLVNIHFPPDYPFKPPKVSFKTKVFHPNINSNGSICLDILKEQWSPALTISKVLLSICSLLTDPNPDDPLVPEIAHMYKTDRSKYETTARSWTQKYAMG	1091.78	762.4	351.501	418.18	655.965	696.149	533.744	670.322	235.596	533.953	269.689	450.425	307.382	289.674	329.293	376.929	710.045	550.076	686.699	580.938	1359.93	1747.05	400.442	996.019	1125.86
Bradi2g22430.1	0.00468552	0.00813484	0.681702	0.216037	0.00248217	0.0123844	0.00248217	0.862289	0.448982	0.862289	0.750325	0.448982	0.550414	MALNGNGNLKPDIQQIESTTSDNDPRATVINTPSTQGVPQPGNQSSGFLNFMNRFSSGSHLRKLGPSPSVKFRQLALERDDFSRSIHSDHHDSHEHFQLIRKINWGHLWAMGKDWIRQPLNMALFVWIVCVAVSGAILFLVMTGMLNHALPSKSQRDTWFEVNNQILNALFTLMCLYQHPMRIYNFVLLCRWDQMDILRLRKIYCKNGTYKPNEWMHMMVVVVLLNLNCFAQYALCGLNIGYRRSERPPLGVGVTISIAIGAVAFASVYNIVSPLGKDYDAEMREGDPEAQFEVTSTEGTRPATSRKSLEKRYSFLHSEERRFVESRPEWVGGLMEFWDSITIAYLSIFCSCCVFGWNVQRLGFGNMYVHIATFLLFCLAPFFIFNLAAVNINNENLRE…	14335	7983.3	7848.9	7312.46	9369.91	9063.55	7787.3	8678.72	6788.73	8079.58	6921.28	6573.4	6801.37	7825.88	7030.48	5475.82	3556.93	4519.84	3275.09	4206.92	5080.96	3704.34	6843.67	5000.36	5157.33
Bradi2g22480.1	0.00203881	0.00393471	0.0732624	0.0108483	0.00158984	0.00162434	0.00158984	0.605928	0.281484	0.605928	0.453487	0.300881	0.281484	MASAPTPPPLLPVTNPTAAGSAAASGGGGGGGSDAPIATPAFRLFLGRISDTARRSLSDRRPWGEMVDRSAFSRPDSVSDATSRLRRNLTYFRVNYTAIVAFALAASLLAHPFSLIILLGVLSAWCFLYLFRASDQPVTLFGRTFSDRETLLGLVGASFVAFFFTSVASLIISGMLVGAGIVAAHGAFRMPEDLFLDDTDAASGNSAAQGLLSFLGAPGSRV	4255	9100.64	10859.8	5897.86	7528.32	3437.32	5099.76	4775.54	4933.85	4561.62	2123.76	2880.14	2446.26	6205.82	3413.99	2316.78	2454.56	1932.11	2357.07	2265.13	2275.3	1244.81	1799.47	3156.82	2119.1
Bradi2g22670.1	3.83699e-06	2.11297e-05	0.0838668	0.415201	0.00161862	9.91701e-06	9.91701e-06	1.10277	0.526291	0.828972	1.10277	0.691022	0.526291	MAAASGAYAANLPAVPEWLNKGDNAWQLTAATFVGIQSMPGLVVLYGSIVKKKWAVNSAFMALYAYASSLLVWVLVGFRMAFGERLLPFWGKAGVALSQDYLVRRASLSATKHGSTPLTEPFYPEATLVLFQFEFAAITLILLAGSVLGRMNIKAWMAFTPLWLLLSYTVGAFSLWGGGFLYHWGVIDYSGGYVIHLSSGIAGFTAAYWVGPRLKSDRERFSPNNILLMIAGGGLLWMGWAGFNGGAPYAANIAASVAVLNTNVSAATSLLTWTCLDVIFFGKPSVIGAVQGMMTGLVCITPGAGLVQTWAAVIMGMFAGSVPWFTMMILHKKSALLMRVDDTLAVFHTHAVAGLLGGLLTGLLATPELMALESPVPGPRGAFYGGGIGQVGKQLAGAA…	16145.1	11263.8	15313.2	15942.1	14666.1	12711.4	13303.7	9739.68	12876.3	12157.8	16432.3	16186.3	16221.4	15853.1	16173.3	9400.48	9703.14	11104.5	10330.2	10134.6	8010.78	5837.16	9159.68	7866.86	7718.62
Bradi2g22750.1	4.5744e-05	0.000151247	0.243075	0.254086	0.000101369	9.51911e-05	9.51911e-05	0.804553	0.339161	0.801566	0.804553	0.371206	0.339161	MGNCCRSPAAAAREDVKSSHFPTSTGKKKPHQARNGGGAGGGGGGGGGGGGEKKLLSVLGEEGRDVSGGIDEKYALDRELGRGEFGVTYLCMDRGSKELLACKSISKRKLRTPVDVEDVRREVAIMRHLPKSPSIVTLREACEDDGAVHLVMELCEGGELFDRIVARGHYTERAAAAVTRTILEVVQLCHHHGVIHRDLKPENFLFANKKENSPLKAIDFGLSIFFKPGEKFSEIVGSPYYMAPEVLKRNYGPEIDIWSAGVILYILLCGVPPFWAETEQGVAQAILRGNIDFKREPWPQVSDNAKDLVRQMLQPDPKIRLTAKQVLEHTWLQNAKKAPNVPLGDIVKSRLKQFSRMNRFKRRALRVIADHLSAEEVEDIKDMFKVMDTDNDGIVSYEE…	16799.6	10955.1	15507.8	13593.9	14214.1	7593.18	11936.5	11874.4	14170.1	11393.5	12659.4	14382.3	9587.93	9114.35	11436	6220.97	3382.54	5615.74	5886.21	5276.36	6074.98	4233.52	5655.62	3319.31	4820.86
Bradi2g22897.1	7.54188e-07	6.20366e-06	0.00612418	5.11737e-06	1.97178e-08	1.35945e-05	1.97178e-08	0.756443	0.371634	0.756443	0.532221	0.371634	0.54884	MGKTRGMGAGRKLKTHRRNQRWADKAYKKSHLGNEWKKPFAGSSHAKGIVLEKIGIEAKQPNSAIRKCARVQLVKNGKKIAAFVPNDGCLNFIEENDEVLIAGFGRKGHAVGDIPGVRFKVVKVSGVSLLALFKEKKEKPRS	57324.7	59933.7	57463.7	51654.4	56594.1	33077.8	41181	52168.3	44813.8	42810.2	29521.1	31325.9	29219.6	30415.7	30120.6	22751.7	22805.3	16985.5	21586.8	21032.3	21851.5	30335.6	33701.3	38356	31061.1
Bradi2g23110.1	4.05197e-06	2.19523e-05	0.00382653	1.63503e-05	6.28874e-07	7.14829e-05	6.28874e-07	0.72897	0.459854	0.72897	0.535506	0.459854	0.522967	MVRVSVLNDALKSMYNAEKRGKRQVMIRPSSKVIIKFLIVMQKHGYIGEFEYVDDHRSGKIVVELNGRLNKCGVISPRFDVGVKEIEGWTARLLPSRQFGYIVLTTSAGIMDHEEARRKNVGGKVLGFFY	58993.6	66315.2	80173.9	70376.4	68964.8	38565.1	52843.7	49813.1	59871.2	50273.3	36234.3	34698.2	34860.2	41931.6	36931.1	39803	28504.6	30882	27665.5	31713.8	34163.6	32214.8	38924.9	38961.8	36066.3
Bradi2g23120.1	0.0360872	0.0485844	0.817296	0.0341754	0.0754952	0.0494545	0.0341754	1.16791	1.0481	1.0481	1.16791	1.14415	1.15698	MAAPPARARADYDYLIKLLLIGDSGVGKSCLLLRFSDGSFTTSFITTIGIDFKIRTIELDQKRIKLQIWDTAGQERFRTITTAYYRGAMGILLVYDVTDESSFNNIRNWIRNIEQHASDNVNKILIGNKADMDESKRAVPTAKGQALADEYGIKFFETSAKTNLNVEQVFFSIARDIKQRLAETDSKPEDKTIKINKTEGGDAPAASGSACCGS	64102.5	64973.3	67943.2	58892	63977.8	67647.8	60663.4	72953.1	66957.2	67055.4	70736.9	83762.2	70416.6	73966.2	74720.5	67278.9	78949.4	69462.6	77110.7	73200.4	81150.2	71618.9	73199	70114.8	74020.7
Bradi2g23130.1	4.23343e-07	3.85872e-06	1	1	6.20163e-06	5.1011e-05	6.20163e-06	453.478	1.16248	1.8368	1.16248	453.478	341.155	MGGGDWHEGAPPLWEGMGGGGWDVDGLVLSERRCATERLLAPLGGVPQVRCHSEVARAAGSRRTVREVNRECVEDRRFRRRKERQAKLVWRNYVDLHSHDLRGRADSQPGLGLGACDMPRGGFGSLELGSRGCRGGFRQGKIEWRRRGRESFEGRRKAWPGGEEQDDGEGAGEAGGAQQACQRRRGRPSLADGQAAVHAGADQEGNPPSLLRAVGDQVLLLRGPRPRHRGGPSVRGAGEDPHPPERAAAGRLAALLDRAGLRDDRRLGHRARVRPPSLLGLLAPRRHCRPGAAFVAARPILLLEVQPPSPPLQHGLAGARRDVVPKQKESAGVVHPLHLHNPVGRLVHIVVQLTLGWPLYLALNASGRPYPRFACHFDPYGPIYNDRERAQIFISDVGV…	113.781	35.5591	109.654	59.3486	79.5858	52.6299	351.649	58.3011	122.154	146.183	14.6283	216.525	34.9008	104.013	92.517	31173	26398.2	37957.1	48833.2	36090.4	14103.2	24622.3	37435.2	32443.9	27151.1
Bradi2g23460.1	2.13193e-07	2.31934e-06	0.747423	4.77454e-05	3.75978e-06	1.55483e-05	3.75978e-06	0.934328	0.384634	0.934328	0.56627	0.430417	0.384634	MAESFVLNTGARIPSIGFGTWQIEPAVVGHTIYAAVKAGYRHIDCAPIYRNEKEVGLALKKLFEDGVVKREDMFITSKLWAGDHAPEDVPEAIDTTLKDLQLDYLDLFLIHGPIRIKKGTMPSPDNFLPPDIPATWGAMEKLYDSGKARAIGVSNFSCKKLEDLLSIARVPPAVNQVECHPIWQQYKLRKLCRSRGVHLSASSPLGSPASFGVSGANVLSNPIVISVAEKLGKTPAQVALRWGIQMGQSVLPKSAHEARIKENYDIFCWSIPEDLLAKFSDIKQARLLRAEFAVHPLSVYKTLEDLWDGEI	22349.2	26537.1	20080.5	17442.2	21602.2	18372.8	18567.5	21226.5	22567.5	20183.6	13634.1	12981.3	11764.3	10551	12232.7	8723.26	10471.1	9170.68	8826.83	9297.97	7875.35	7672.39	8222.85	9465.21	8308.95
Bradi2g23507.1	0.0106751	0.0165535	0.264505	0.359143	0.00548718	0.0118831	0.00548718	0.671106	0.200952	0.628683	0.671106	0.200952	0.27956	MASADPNRAFMKDVKRIIIKVGTAVITRNDGRLALGRIGALCEQVKDLNSQGYEVIMVTSGAVGVGRQRLRYRKLVNSSFADLQKPQNELDGKACAAVGQSGLMALYDMLFTQLDVSSSQLLVTDSDFDNSNFRERLCETVESLLELRVIPIFNENDAVSTRKAPYEDSSGIFWDNDSLAGLLALELKADLLVLLSDVDGLYSGPPSEPSSKIIHTYIKEIHYQEITFGDKSRVGRGGMTAKVQAASLASGGGIPVVITSGFDSQSIVKVLQGEKIGTLFHKNASLWEPSKDASVHEMAVAARDCSRRLQNLSSEERKKILFDVADALEANEDLIRSENEADIAAAQEAGYETSLVSRLTLKPGKIASLAKSIRTLANMEDPINEILKRTEVADGLVLE…	4481.41	9548.37	2586.94	3924.23	5135.24	3277.34	4029.83	2188.83	3417.75	3228.44	2903.79	4574.99	2322.59	3983.77	3446.29	645.082	763.005	1711.51	1008.14	1031.94	1227.18	1375.72	2227.23	912.303	1435.61
Bradi2g23630.1	0.000130893	0.000358893	0.412947	0.00194476	0.624589	0.248755	0.00194476	2.48019	0.385592	1.49852	2.48019	0.615925	0.385592	MAPPRSQSSFTGLVTKLDMGKGNPKEAVETLRVKDAGMLEGVGVLHIAACRGRLEVCRYLIEELRVDVNGVDKEGRTPLKFAIRCNSVVKYLLDHGADPDRASHDGISPLHDAARSGDCLTVELLLAKGAYVDPVAFCGTPLHCTATGDHDSTMKILLDHHADELISSCSHRYNKMVDGKTPLIAAVDADSRKCMLLLIRVGAESRGALTYAVKNLHSAKMVSSDFLDCILEDVGADCVISHALLFRALHECTPTLLQVATLPHTSGVLVRSEHSSLWYLKFPTFVPDTVMYWILCSCDRVGFISLNWCHLKFIYIVVLVFWEQDEPVAKRKIRAAGFKRLGNDAFKNKDYSSAEGSYSVVY	2346.86	2192.51	2364.1	1579.21	2120.67	5027.63	4221.11	1230.26	2232.44	3177.86	6331.87	5809.95	4372.68	4524.14	5259.66	2763.82	893.149	713.697	854.029	1306.17	628.66	806.819	1093.59	741.783	817.714
Bradi2g23770.1	0.17815	0.200104	0.982813	0.521269	0.9861	0.497656	0.497656	1.16377	0.831487	0.949448	1.16377	0.952313	0.831487	MAASLWRAVMGSSSAGADDPATGGVEFWHGAERAGWLTKQGEYIKTWRRRWFVLKQGRLFWFKDPVVTRASVPRGVIPVSSCLTVKGAEDVLNRQFAFELSTPTETMYFIADAEKEKEEWINSIGRSIVQHSRSVTDAEVVDYDSRPQPSPRAKKSEASEPSE	18463.7	21463	23913.1	20653.5	21123.3	17977.7	19330.6	22377.5	20536.1	20055.5	19635.2	26706.6	21909.1	30080.2	24582.8	18733.3	28230.5	19846	13654.2	20116	14719	19334.5	18040.6	18161	17563.8
Bradi2g24070.1	1.64088e-06	1.11795e-05	4.53045e-06	0.203076	2.65288e-06	0.000234959	2.65288e-06	0.847153	0.350967	0.417974	0.847153	0.350967	0.56093	MADEDVQPIVCDNGTGMVKAGFAGDDAPRAVFPSIVGRPRHTGVMVGMGQKDAYVGDEAQAKRGILTLKYPIEHGIVNNWDDMEKIWHHTFYNELRVAPEDHPVLLTEAPLNPKANREKMTQIMFETFNCPAMYVAIQAVLSLYASGRTTGIVLDSGDGVSHTVPIYEGYTLPHAILRLDLAGRDLTDNLMKILTERGYSLTTTAEREIVRDIKEKLAYVALDYEQELETSKSSSSVEKSYEMPDGQVITIGSERFRCPEVLFQPSLVGMEAPGIHEATYNSIMKCDVDIRKDLYGNVVLSGGSTMFPGIADRMSKEITALAPSSMKVKVIAPPERKYSVWIGGSILASLSTFQQMWIAKAEYDESGPGIVHMKCF	5370.41	4273.69	5459.96	4077.02	4795.27	2095.3	1597.19	1833.71	2491	2004.3	5014.97	3701.21	3678.79	3854.34	4062.33	1992.39	1665.42	1925.52	1148.59	1682.98	2666.57	2074.9	3059.36	2958.42	2689.81
Bradi2g24190.1	0.00467621	0.00812913	0.159057	0.00117126	0.50639	0.159082	0.00117126	1.54996	1.15436	1.24448	1.54996	1.15436	1.24441	MAQPQRVYEAWKGNNRFFLGGRFIFGPDAKSLLVSVALIVVPVFVFCVFVARYLLHRFSVYNAGYAIPAVAIAFMIYVLLLLLITSAQDPGIVPRASHPPEEEFSYGNPLAGETPGRLQFPRVKEVMVNGMPVKVKYCDTCMIYRPPRCSHCSICNNCVERFDHHCPWVGQCIGQRNYRYFFLFVSSSTLLCIYVFAMSALHIKFLMDGDYPTVWKAFKHSPACLVLMIYCFIALWFVGGLTGFHSYLISTNQTTYENFRYRSDNRPNVYNQGCLNNFLEVLCSKGKPSKHRFRAYVQEEVRAPVVNFGRQMEEEPTGGSRAKVEDDLEIGSDLLKISQRRNYEDVDVEMGNQDHSEMESMANAKLVMGSESQIPAVVSEVRVRHSSWDQRSGNWDMSS…	59703.8	59287.3	79748.5	71263.1	67500.7	95875.4	91091.4	66612.9	82432.4	84003	86810.3	125021	92326.9	114334	104623	72442.9	82987.2	78147.3	78103.4	77920.2	88324.2	83376.3	85140.9	79153.1	83998.6
Bradi2g24430.1	0.0067093	0.0109974	0.0670818	0.881639	0.0221895	0.696828	0.0221895	1.10929	0.52031	0.608323	1.10929	0.52031	0.843081	MAEETKQETAAAAAELVATEAEKKAEVEEKVDEAAAAAAEEAEEEKKIEEAETEAGAEEAAVIEGSTGSFKEESNLVSELADPEQKALAQLKELIAAALASGEFDLPPPPPPVQPDTATPAADDAKTEEAEEPKAEEAAKSDAAPEGEEPKAEEAEVSEPKTEAPAPEEPKTDDPAQEEPKTVEPTKEEPNTEAPVVAAAEQPKAVAAAEEAKPAEPTPETEEKTVVVTEEEGTKAVEATEETAVPAASEPEAAPAAELIWGVPLVGDDERTDTVLLKFLRAREFKVKEAMAMLKAAVLWRKSFGIDALLGTDLGVPELENVVFYRGADREGHPVCYNVYSEFQDKELYEKAFGDDEKRERFLKWRIQLLERGILEQLDFSPSGICSMVQVTDLKNSPP…	361967	238018	327500	170157	274410	153303	194587	90588.3	229243	166930	282474	216877	346109	372140	304400	143032	116393	165059	146631	142779	252279	202488	268085	202549	231350
Bradi2g24440.1	0.0586076	0.0747275	0.0784569	0.999975	0.164012	0.274046	0.0784569	1.01124	0.622809	0.622809	1.01124	0.685422	0.733167	MAEETKQETAAAAAAEVVATEAEKKVEEVEEKAVQAEEKVDEAAATAAEEEEEKKMEEAEAEAGADEAAVIEGSTGTFKEESNLVSELADPEQKALAQLKELVAAALASGEFDLPPPPPVAQPDTATPADDEAKKEEPKAQEAEASEPKTEAPEPEEPKTDAPAQEEPKTEEPTKEEPKTEAPVVAAAEEPKAPVAAEEAEPVPETEEKTVVVTEEEGTKTVEAIEETVVPTASEPDAAPAPAAEPKEELIWGVPLVGDDARTDTVLLKFLRAREFKVKEAMAMLKAAVLWRKSFGIDALLGADLGLPELENVVFYRGADREGHPVCYNVYSEFQDKELYEKAFGDDAKRERFLKWRIQLLERGILQQLDFSPSGICSMVQVTDLKNSPPMLGKHRAVT…	772251	507237	628447	349976	564478	326739	402810	227569	449129	351562	512442	372525	752667	645664	570825	355265	314853	457721	419784	386906	423987	439899	402688	388851	413856
Bradi2g24690.1	4.58751e-08	6.80061e-07	1	1	2.85106e-08	7.42295e-05	2.85106e-08	4358.35	0	0	10.8974	4358.35	2899.06	MARNPGCAVFIGNLDEKVPERVLYEILVQVGHVVDLHIPRDKETNRGRGYAFAEYETEEIAQYAVKLFSGLVRLHNRTLRFAISGQDKPSSNANMPVTPKMNPIPLRNPPQLLRSSDTPVSQHRVVNGRIAGYGAPPSHSNDFHAQASSGVASRGLSDGTYEYSRRVFGSVLNDVNRRAPTQPVPYPSY	0	0	0	0	0	0	0	0	0	0	31.0169	12.5726	0	0	10.8974	3742.77	3241.1	4827.47	5622.07	4358.35	2119.78	2437.01	4152.61	2886.84	2899.06
Bradi2g24850.1	1.05434e-06	8.12745e-06	0.00242715	6.16068e-08	0.343805	0.35668	6.16068e-08	6.95277	2.00942	3.75169	6.95277	2.02594	2.00942	MEDVAKFLFGISGNVIALFLFLSPVPTFWRIIRKKSTEEFSGVPYNMTLLNCLLSAWYGLPFVSPNNILVSTINGAGAAIEACYVVIFLCFASSKKARLRTLGLASAVVAVFAAVALVSMLALHGPGRKLLSGLAMAVFSICMYASPLSIMRLVIRTKSVEYMPFLLSLAVFLCGTSWFVYGLLGRDPFVAVPNGCGSVLGAAQLILYAVYRNNKGKSSDGKLQGSDDVEMSVDARNNKVAHGDDAGGSQDVQQDS	194.767	632.842	564.82	488.187	470.154	1619.74	1700.53	1325.33	2409.88	1763.87	2388.33	3596.67	4093.58	2996.91	3268.87	912.903	609.28	1051.57	1236.26	952.503	997.287	795.594	796.389	1189.67	944.735
Bradi2g25190.1	0.00308507	0.00565456	0.19024	0.026985	0.000578985	0.0447103	0.000578985	2.41243	1.56439	1.56439	1.86535	2.41243	1.79224	MAKAEGEAAALEFTPTWIVAAICSLIVLISLVAERLIHYLGKTFKKKNQKPLYEAILKVKEELMLLGFISLLLTVFQGMIQDTCIRPSWTVHMLPCQREEEVESTKEHSVTAHIIGRIGRRLLSDGAAGAEHCRKKGKVPLMSLEAIHQLHIFIFVLAITHVVFSVTTMLLGGAKIHQWKQWEDTIQKDTAGNGPKKVTRVHQFEFIKEHFKGIGKDSRILSWIHCFFKQFYGSVGKSDYETMRRGFIMTHCRGNLKFDFHKYMLRVLEADFKKVVGISWYLWVFVVIFLLLNVNGWHTYFWIAFIPLLLLLAVGTKLEHVIAQLAHDVAEKHSAIEGDLIVKPSDDHFWFGRPRIILFLIHFILFQNSFEIAFFFWILTTYGFNSCIMGQVGFIVPRL…	6223.37	2377.26	5098.54	8145.29	5461.12	9732.64	8798.38	6777.88	8864.38	8543.32	8240.61	11601.2	9589.43	11316.5	10186.9	13203.1	14970.1	16443.7	8081.42	13174.6	10702.2	8923.98	10574.2	8950.21	9787.65
Bradi2g25210.1	9.88098e-06	4.24505e-05	0.0185381	5.29601e-05	2.13104e-06	9.27844e-05	2.13104e-06	0.867254	0.676808	0.867254	0.758683	0.676808	0.74724	MDEEYDVIVLGTGLKECILSGLLSVDGLKVLHMDRNDYYGGDSTSLNLNQLWKKFRGEEKPPAHLGASRDYNVDMVPKFMMANGTLVRTLIHTDVTKYLSFKAVDGSYVFSKGKIHKVPATDMEALRSPLMGLFEKRRARNFFIYVQDYNDADPKTHQGCDLTRMTTKELIAKHGLSDDTVDFIGHALALHRDDRYLNEPAIDTVKRMKLYAESLARFQGGSPYIYPLYGLGELPQAFARLSAVYGGTYMLNKPECKVEFDMEGKVCGVTSEGETAKCKKVVCDPSYLPNKVRKIGKVARAIAIMSHPIPNANESHSVQIILPQKQLGRRSDMYVFCCSYTHNVAPKGKFIAFVSAEAETDNPQSELKPGIDLLGSVDELFFDMYDRYEPVNEPSLDNC…	605838	723200	767762	736669	708367	609127	582694	599507	666009	614334	517487	543781	521542	566895	537426	518658	474568	469606	454882	479428	536383	489984	559020	531894	529320
Bradi2g25320.1	0.15791	0.18022	0.567078	0.751816	0.511349	0.990977	0.511349	1.13996	0.869317	0.869317	1.10073	1.13996	1.03582	MTNHCPPLRVILLLLLISSCFSSDLDVQCLRSVLRSVIDPNRILISSWNFDNSSTIGYICRFTGVECWHPDENRVLSLRLGNLGLQGSFPQGLQNCSSMTGLDLSSNNFTGPIPLDISREIPYLTLLDLSYNSFSGSIPQNISNMTYLNLLNLQHNQFSGTIPPQFDLLSRLATFNVADNRLSGFIPSSLRKFPASNFAGNQGLCGDPLDECQASSKSKNNSAIVGAIVGVVVVIIIVVIVVFFCLRKLPAKKAKGEDENKWAKSIKGTKAIKVSMFENPVSKIKLSDLMKATDQFSKENIIGTGRTGTMYRAVLPDGSFLAVKRLQDSQHSESQFTSEMKTLGQVRHRNLVPLLGFCIAKREKLLVYKHTPKGSLYDQLHKEGEDCKMDWPLRLRIGI…	20913.9	14870.7	13173	14689.5	15911.8	15447.6	15814.8	11490.4	12576.7	13832.4	17524.6	18119.5	17517.1	16897.3	17514.6	21468.2	16425.4	18295.2	16366.7	18138.9	18689.3	13706.5	18633.5	14897.5	16481.7
Bradi2g25417.1	0.0241044	0.0336264	0.998624	0.442235	0.279114	0.0120687	0.0120687	1.5495	1.03271	1.03271	1.22745	1.27856	1.5495	MAEDGKEGTKDAAAEKSKTKEGGFRTMPFILANDFCDRLATVGFGSNLISYLTLQLHLPLVEASNMLTNYHGTTNLTPLVGGLIADSFAGRFWTITVGSIIYQLGMVCLTLSAAIPSLRPPPCAKHGAECQRASAYQIAILYLSLLCTSIGSGGTRPCNMAFGADQLELDARRRRGGKAPMWSFFNLYFFGIELAKLTAVTAVVYVQENVGWGWGLGVPTIAMFVAVIGFVSGYSLYVKMPPGGSPLVRLAQVAAAAFKKRKAVVTDPGLLYEDKALDAGISTTGRLLHTNQLKFFDKAAIVMDGDVLPSGQPKLWRLSTVHRVEEIKSIVRMLPIWAAGILMVTASSHNSSFAIQQARTMDRGITNNFKIPPASMLIFSNLAMLLTLAFYDRVLVRVL…	19704	14798.9	24452.6	29709.9	22166.3	23837.2	27618.1	18789.8	21320.2	22891.3	26972.9	32611.8	19615.4	29632	27208	28270.3	32437.2	25666.8	26989.2	28340.9	42294	30312.9	30962.8	33816.8	34346.6
Bradi2g25640.1	0.0193638	0.0278781	0.677864	0.451364	0.0049078	0.547703	0.0049078	6.02739	2.36985	2.36985	2.82654	6.02739	2.62562	MAEEGEEAPPAVEFGLPRELAAVLPTDPFEQLDVARKITSIALASRVGRLEAECARLRAQLAERDDATEDLRERVEQLDSALALATDRLRLAEEEKETLLKENATLSNTVNKLNRDVAKLEVFKKTLMQSLQEDDDNPKIAPRAKLTEASSFNSAPSVGDEHSAFPTSKSSQLSETASSVSEGSSHAEPDVPMPPRSHVYLPSYNSTPKLTPPGSPPRGYAPLSPPRRHSISVASMNRLDDRSSVFSSNHSSMTSPFEAASQTGRTRVDGKEFFRQVRNRLSYEQFSAFLANVKELNAHKQTREDTLRKADEIFGAENSDLYTIFESLITRSHH	17070.7	7983.88	16893.2	20465.1	15603.2	42437	44590.2	29678.8	31202.9	36977.2	42632	54139.8	39810.2	39830.3	44103.1	88109	183663	52044.7	52370	94046.6	28187.1	51289.6	41907.5	42488.1	40968.1
Bradi2g26040.1	3.25861e-06	1.89547e-05	0.001012	2.45193e-06	1.13814e-05	1.68323e-06	1.68323e-06	0.651468	0.369946	0.651468	0.451558	0.470761	0.369946	MASPQCCANPPTLNPAGGEGKVVDSFGGIRAYVAGAQESKAAVILVSDVFGFEAPNLRKIADKVALSGYFVVVPDFIHGDPYVPESVDKPIAVWIKEHAPEKAFEEAKPVIAALKKQGASSVGAAGYCWGAKVVVELAKANEIQAAVMLHPSFVTVDDIKEVKCPIAILGAEIDKMSPPEVVKQFEQVLSSNSGVGHFVKIFPGVAHGWTVRYNSDDASAVKSAEEALADMTSWFDQNLK	88820.8	129014	127047	102667	111887	58147.2	61591.3	81226.6	90598.4	72890.9	47366.8	51528.8	50145.3	53053.5	50523.6	52958.9	54832.6	42536.2	60361	52672.2	38660.5	37319	43700.3	45889.2	41392.2
Bradi2g26260.1	0.000412253	0.000972254	0.999527	0.0208296	0.00133585	0.00218437	0.00133585	0.973227	0.227033	0.973227	0.455872	0.227033	0.252623	MAAAAGAGRARGASLAAAVRAVAATARPASSAAAAAGMSVAALVVQGEDTPFGSLGWWAYAGTSCFLVLFAGIMSGLTLGLMSLGLVELEILQRSGTDSEKAQAATILPVVQKQHQLLVTLLLCNAVAMEALPIFLDRMFHPVVAVVLSVTFVLAFGEVIPQAICTRYGLAVGANFVWLVRILMIMCYPIAYPIGKLLDCALGHNESALFRRAQLKALVSIHSKEAGKGGELTHDETTIISGALDLTEKTAEEAMTPIESTFSLDVDSKLDWEAIGKILARGHSRVPVYSGNPRNVIGLLLVKSLLTVRAETETPVSAVSIRRIPRVPADMPLYDILNEFQKGSSHMAAVVKAKPKTAPPPEPNRAAAGVTQLTTPLLSNVEERVENVVVDIEAPQSKQ…	12352.3	29390.7	22409.2	15075.2	19806.9	18079.7	18737.6	15657.7	24631.3	19276.6	10343.9	6601.59	15858.7	3313.43	9029.4	4827.37	3121.06	4579.54	5459.24	4496.8	6761.31	8861.55	1143.01	3248.79	5003.66
Bradi2g26760.1	0.102063	0.121735	0.357443	0.575114	0.581727	0.703713	0.357443	1.20126	0.87028	1.20126	1.15448	1.1532	0.87028	MADEVQALTKAFSGLGGLGVDETTMVSTLAQWRKQPEKRSGFRKSFRGLFKEHGVIERCEDEYMLHLAAEFSRFKNLMVLWAMHPWERDARLAHHVLHQAHPPAIAVEIACTRSAEDLLGARKAYQALFHHSLEEDVAFHAKDKPYCSLLVGLVSAYRYEGPKVNEDTAKAEAKALGAALKKKEAAAVENGEVVRILTTRSKPHLVETFKHYKELHGKHIHEDLGSEETLIREAVQCLAAPEMYFSQVMEAALREGADHHGKEALARVAVTRSDVDMDGIRAAYQEQFGARLEDAVAACAHGHFKDALLSLIAGGK	523493	679155	810113	787328	700022	1.03936e+06	846729	753438	724115	840911	689177	791853	813706	937901	808159	731965	629154	859977	1.00795e+06	807263	680882	652698	531378	571903	609215
Bradi2g26770.1	0.981955	0.982684	0.999134	0.986106	0.969957	1	0.969957	1.00195	0.957204	0.983377	0.965538	0.957204	1.00195	MCCWCCCLECIHNIPPISLIFHHFSDSLPSSAPGREEEEEEEEEAPVTSMASISVPDPVPAPTEDAENIRKAVEGWGTDEKALIEILGHRTAAQRAEIAVAYEGLYDQPLIGRLQDELSSHFRGAMMLWTMDPAARDAKLAYKALRKKGGDRHAWVLIEVACASSPDHLVAVRKAYCSAYESSLEEDVAACSLYKDPLKQFLVRLVSSYRYAGGEHVDDELARAEAAELHGAVVAQKQPLHGDVVRVISSRSKPQLKATFQHYKQHHGKSFDEVLEGNRNDQLSAMLKTAVWCLTTPEKHFAEVIRNSIVGLGTDEESLTRGIVSRAEIDMKKVKEEYKARFKTTVTNDIIGDTSGYYKDILLTLVGPE	207902	213028	270316	216045	226823	271053	241846	184763	194547	223052	193726	223704	214678	243916	219006	220163	188460	224309	235532	217116	247293	193243	258512	210013	227265
Bradi2g27190.1	5.22677e-06	2.61145e-05	0.00194295	8.91222e-05	6.67353e-07	2.80837e-06	6.67353e-07	0.660379	0.390506	0.660379	0.515699	0.390506	0.404802	MTAVTPTQEELLRAHLEEQKIEEGDEPVVEDDDDEEDDDDDEDDKDDDDVEGGDASGRSKQSRSEKKSRKAMLKLGMKSITGVSRVTVKKSKNILFVISKPDVFKSPASDTYVIFGEAKIEDLSSQLQSQAAEQFKAPDLSSVISNPEASTAAQDDDEEVDDTDVEPKDIELVMTQAGVPRARAVKALKSADGDIVSAIMELTN	84333.2	98477.1	130757	107228	105199	56110.9	74251.7	66169.4	81352.4	69471.1	59764.6	57440.3	47845.1	51953.9	54251	45732.3	28134	40414.9	50041.7	41080.7	40055	34982.6	43700	51601.2	42584.7
Bradi2g27267.1	0.00396201	0.00701411	0.0106384	0.00945338	0.994256	0.767374	0.00945338	1.69604	1.05805	1.68537	1.69604	1.05805	1.17934	MGGCLSGDVRGGMEAVGGAGASGGRGPATAGQGQGGLNEAVDYLLQNNGLRGLYMPLELSFSASKLRNMDVLSKSDPMLVVYAKIDGKLEEIGRTEVILNSLEPSWITKATVNYQFEIVQPLVFRIYDIDTRYHNTPVKMLNLNEQDYLGEASCNLSEIVTKSNHSLTLNLRSGSQHALLGTITVHSEESSSSRTAIEMTFHCLNLDNKDMFSKSDPFLKVSRLTESSVAVPICKTEVVINNLNPVWRPITLTSQQYGSKDNPLLVECFDFDASGDHQFIGALQTTITQLQNIHNSKAGANFYSHKGQKKLKGQLFLDKFQEKVQHTFLDYISGGFELNFMVAVDFTASNGDPRTPQSLHYIDPSGRPNSYQQAILGVSEVLQFYDNDRRFPAWGFGAK…	89652.2	85397.5	109434	164614	112274	199996	224809	153741	178351	189224	167627	207013	212418	174629	190421	114008	82579.3	127876	150704	118792	173685	147792	111861	96302.1	132410
Bradi2g27987.1	0.323398	0.347898	1	0.895006	0.778938	0.577721	0.577721	1.16969	0.77233	0.999241	0.87034	1.16969	0.77233	MEADGSLESRQESHLGFDHESLKEPRDPEKRKGGWITFPFLAVAILGLGLATGGALSNMVVYLIKEYNVPSVDAAQISTIISGSISVAPVAGAIVADALFGCYPIVAVAMALSVLSLIMFTLTASIPTLRPAVCQFGAGQPCDQASTGQMAALYGAVCLLCLSAAGARFNQATMGANQFDASADRDVFFNWYFIMLYASSVLGATVIVYIQDTVSWSLGFGVSCAASVVGLGALLLGARYYRQPAAQGSPFTGLARVVVAATRKRKVNLVASEELKFYYGIRSTSSSEGDGEVISDGNLAPTDSFSFLNRAAAITDGDVDGADGRAVRPWRICTVQQVEDFKTVLRILPLWSSAVVLSISIGVQINFTVLQALVMDRAVGRFTVPAGSMFVGSLISVVI…	9077.07	5392.75	6620.62	5276.16	6591.65	9167.77	6330.75	6042.22	4805.85	6586.65	4686.23	7786.81	5153.89	5320.97	5736.97	8540.87	7618.1	7639.32	7042.34	7710.16	8914.87	4145.5	3761.02	3542.32	5090.93
Bradi2g28680.1	2.72887e-08	4.75489e-07	0.000714475	2.7971e-09	1.41164e-10	1.17168e-08	1.41164e-10	0.699425	0.305976	0.699425	0.391341	0.305976	0.351624	MSSDDEVREEKELDLSSNEVVTKYKTAAEIINKALKLVLSECKPKAKIVDICEKGDNFITEQTGNVYKNVKKKIERGIAFPTCLSVNNTVCHFSPLATDDAILEENDMVKIDMGCHIDGFIAVVAHTHVIKDGPVTGRAADVLAAANTAAEVAMRLVRPGKNNKDVTEAIQKVATAYDCKIVEGVLSHQLKQFVIDGNKVVLSVSNADTKVDDAEFEENEVYAIDIVTSTGEGKPKLLDEKQTTIYKRAVDKNYHLKMKASRFIFSEISQKFPIMPFTARVLEEKRARLGLVECMNHELLQPYPVLHEKPGCDLVAHIKFTVLLMPNGSDRVTSHSLQELQPSKSIEDNAEIKGWLALGTKTKKKGGGKKKKGKKGDAAEAEPMEEGSKDAPSQE	61447.2	79525.3	87432.7	77474.6	76469.9	42792.3	57442.6	52953.7	60751.2	53485	30157.2	37533.3	24368.1	27644.7	29925.8	25838.8	22391.5	23422.9	21938.7	23398	25642.6	25604.8	26280.9	30026.2	26888.6
Bradi2g30560.1	1.75934e-05	6.74248e-05	2.11759e-05	1.51046e-05	0.000189727	1.9252e-05	1.51046e-05	0.413151	0.257782	0.292944	0.306053	0.413151	0.257782	MATTTFPTSTPFFVNHGSRRPSVNVRTAAAVYGRGGRRWRPLRVACEKVVGIDLGTTNSAVAAMEGGKPTIVTNAEGARTTPSVVAYTKAGDRLVGQIAKRQAVVNPENTFFSVKRFIGRKMNEVAEESKQVSYRIIRDDNGNVKLDCPAIGKQFAAEEISAQVLRKLVDDASKFLNDKVTKAVITVPAYFNDSQRTATKDAGRIAGLDVLRIINEPTAASLAYGFEKKNNETILVFDLGGGTFDVSVLEVGDGVFEVLSTSGDTHLGGDDFDKRIVDWLAGSFKNDEGIDLLKDKQALQRLTEAAEKAKMELSSLTQTNISLPFITATADGPKHIETTLTRAKFEELCSDLLDRLRTPVDNSLRDAKLSLKEIDEVILVGGSTRIPAVQDLVKKMTGK…	306073	655571	441980	422542	456542	123523	121114	140730	149598	133741	134299	132966	154965	136674	139726	136298	221051	199808	197326	188621	149954	107203	98194.5	115402	117688
Bradi2g31107.1	0.000256716	0.000643699	0.00357996	0.000451292	0.000426051	0.000114424	0.000114424	0.610811	0.458338	0.610811	0.512776	0.514314	0.458338	MEEKGGGLGRPQRREKRRMCGPAASSEPGSMAMTSQDLCSSRSCEEDGGGTATTHGKWNPYESHRPEIDDAPVFTPTEEEFEDPIGYITSIRPQAEKYGICRIVPPPSWRPPCPLKEKSFWDCTEFNTRVQEVDKLQNREPTKKRTQPRVQKKRKRRKRLRFGMFRRRPSANASENADSEEKFGFQSGSDFTLEEFQKYADEFKQRYFGMKGSDEISLSEIKNHKEIWRPSVEEIEGEYWRIVVCPDDEVEVDYGADLDTATFGSGFPKLSLSDANKQDPYCLSCWNLNNLRRQHGSVLSFETEDISGVVVPWLYVGMCFSSFCWHVEDHFLYSLNYMHFGEQKVWYGVRGDDAVKLEEAMKRNLPRLFEEQPDLLHELVTQLSPSVLKSEGIPVYRVV…	10272.7	9603.5	14660.4	13629.3	12041.5	5611.22	7401.1	6926.58	9481.35	7355.06	6712.13	7277.83	4910.79	5797.53	6174.57	7770.64	7291.79	5540.27	4169.7	6193.1	4782.93	5095.27	6164.44	6033.62	5519.06
Bradi2g31830.1	0.0168972	0.0248034	0.954041	0.270705	0.520337	0.0223388	0.0223388	1.79859	0.864901	0.864901	1.4493	1.3303	1.79859	MAPPPRRLLLALFGFLTAAVLATLVAAVYEDQVGLADWHQKYIGKVKQAVYHSQKSGRRRVVVLTEENVIASLDLRSGDIFWRHVIEKNDPIDQLSLSLGKYVVTLSSGGSILRAWNLPDGQMIWETNIQTSTASKSLLHVLSSNKVAKDNLVLVSTGRSIYAVSSIDGVISWRKDFTLDDLEIKQVIQSPENDIVSVVGVAGSSKLALYQLNAKSGEIVKDAQESLPGGLCGETVLGSHDVLIALDQTRSAIFVIEFKGLSLSYNKVRVSNFVQDLSGTVKLLPLMSNGIIALQSSCTVYLLKLKGMDGLEVIHSFDRPAAVSDALAITEKDEAFAVVQHVGSQIEFIVKVTSDLSNEVIREKVDIDQHRGSVQKVFLNNYVRTDKSHGFRALIVMED…	7628.66	5049.18	3439.29	2616.18	4683.33	6210.02	3068.72	3437.33	3486.39	4050.62	5972.93	6513.99	6241.67	8421.6	6787.55	8620.56	5404.43	5818.35	5077.49	6230.21	6886.02	7168.42	10862.1	8777.08	8423.41
Bradi2g31910.1	0.00858825	0.013727	0.117226	0.958756	0.0134344	0.0130677	0.0130677	1.57353	1.08661	1.38168	1.08661	1.5718	1.57353	MGEGNGVAWAGALSPAARYAESGGASLTWENLTAVLPGSGGRATKKLLQGLYGYAVPGRIVAIMGPSGSGKSTLLDSLSGRLARNVLQTGKVLLNGKKRRLDFGAVAYVTQENVLLGTLTVRETVTYSALLRLPSSMSKAEVRRVVDDTLDEMGLRECAERPVGTWHLRGVSGGEKKRLCIALEILTRPRLLFLDEPTSGLDSASAFSVIETLRQLARDGGRTVVSSVHQPSSEVFALFDDLCLLSSGESVYFGDAKLAPQFFAETGFPCPSRRNPSDHFLRCVNADFDDVATAMKGSMKLRAEADLDPLLKYSTAEIRERLVEKYRISDYALMVKNTIHEITKIEGVVEEAVKGSQATWCKQLRTLTKRSYKNMYRDFGYYRLRIIIYVLMAICLGTI…	767179	604239	699488	779799	712676	948391	872682	1.13052e+06	987174	984691	792493	723802	806143	775165	774401	830663	891181	1.33939e+06	1.41949e+06	1.12018e+06	1.31337e+06	1.23773e+06	995987	938596	1.12142e+06
Bradi2g31990.1	0.108303	0.128383	0.495569	0.942297	0.85664	0.385407	0.385407	1.24527	0.785215	0.785215	1.0914	1.12307	1.24527	MHPSPPPAYANRPPQAPPPPPPPMINSSGGSGSNYSGGEILPPPSPGTALGFSKSTFTYEELVRATDGFSDANLLGQGGFGYVHKGVLPNGKEIAVKQLKLGSGQGEREFQAEVEIISRVHHKHLVSLVGYCISGGKRLLVYEFVTNNTLEFHLHGKGRPVMEWPTRLRIALGAAKGLAYIHEDCHPKIIHRDIKSSNILLDFKFEAKVADFGLAKFTSDNNTHVSTRVMGTFGYLAPEYASSGKLTEKSDVFSFGVMLLELITGRRPVDSAQTYMDDSLVDWARPLLMRALEDGNYDELVDARLGKDFNPNEIARMIACAAACVRHSARRRPRMSQVVRALEGDVSLEDLNEGVRPGHSRFFGSYSSSDYDSGQYNEDMKKFKKMAFTTNDYTSSQYS…	262379	135874	165645	96327.6	165057	131207	146880	101175	139157	129605	165277	149558	189659	216080	180144	200464	159361	214228	167428	185370	196011	200418	212872	212858	205540
Bradi2g32300.1	1.55157e-07	1.82006e-06	0.999978	0.999994	7.90053e-05	1.03759e-07	1.03759e-07	86.4291	0.312147	0.312147	0.503547	59.1908	86.4291	MSASRTPGTPASKIERTQLPTLTPGGSSRSKEEKIFVTVRVRPLSKKELAVKDQVAWDCADSHTILYKAPPQDRAAPTSYTFDKVFGPTCQTDLVYADGAKDVAMSALTGINATIFAYGQTSSGKTFTMRGVTESAVSDIYGHIENTPEREFIIKISAMEIYNEIVKDLLRPESSPLRLLDDPEKGTIVEKLEEEIVKDRQHLRHLISICEEQRHVGETALNDTSSRSHQIIKLTVESKLREVTGCVKSFVASLNFVDLAGSERAAQTNAIGARLKEGCHINRSLLTLTTVIRKLSSEKRSGHIPYRDSKLTRILQLSLGGNARTAIICTMSPALTHVEQSRNTLFFATCAKEVTNTAKVNMVVSDKQLVKHLQTEVARLEAELKTPDRSSSFEILIME…	43.5316	207.415	63.6506	37.1332	87.9325	14.4441	0	95.3473	0	27.4479	0	55.4326	57.6409	64.0389	44.2781	7124.36	5448.43	2837.49	5408.88	5204.79	5026.54	7306.1	8314.8	9752.28	7599.93
Bradi2g33060.1	7.28588e-05	0.000221366	0.162698	0.0347522	2.54197e-05	0.000308502	2.54197e-05	0.724615	0.147516	0.724615	0.614332	0.147516	0.276182	MSKYGTIPSSSSSEPPPTAGSSPLDFISRAKALGASALSTRRPWRELADPGALAVPRGLGDAYARARANLAHFSMNYAIVVLAVVFVSLLWHPWSLVVFLACMVAWLFLYFLRDVPLQVSAGRAVIGDGVVLAALSGITLVLLLLTGATANILGSLLVGVVLVLVHALLHRPADSIDEEAGRWYTPVPPPPPY	7416.56	17151.6	16785.6	9922.97	12819.2	9252.08	10591.7	7390.14	9921.92	9288.95	6867.4	9053.99	7024.75	8554.76	7875.23	2181.03	1732.44	2536.31	1114.35	1891.03	2495.48	3074.16	3437.21	5154.84	3540.42
Bradi2g33450.1	2.4997e-07	2.59392e-06	0.00757985	1.08737e-08	1.74408e-06	1.33718e-06	1.08737e-08	0.780766	0.398242	0.780766	0.398242	0.512038	0.526792	MAGGGVEDAYGEDRATEEQLITPWSFSVASGHSLLRDPRHNKGLAFSEAERDAHYLRGLLPPVIASQELQEKKLMHNLRQYTVPLQRYIAMMDLQERNERLFYKLLIDNVEELLPVVYTPVVGEACQKFGSIYRRPQGLYISLKDKGKVLEVLKNWPERSIQVIVVTDGERILGLGDLGCQGMGIPVGKLSLYTALGGVRPSACLPITIDVGTNNETLLNDEYYIGLRQRRATGEEYHELLQEFMTAVKQNYGEKVLVQFEDFANHNAFDLLAKYSKSHLVFNDDIQGTASVVLAGLLASLKVVGGTLADHTYLFLGAGEAGTGIAELIALEMSKHTDTPVDDCRKKIWLVDSKGLLVESRKESLQHFKKPFAHEHEPMKTLLEAVQSIKPTVLIGTSG…	1.0766e+06	1.47627e+06	1.3658e+06	1.1728e+06	1.27287e+06	915846	848557	1.0321e+06	1.17875e+06	993812	510805	481946	511208	523680	506910	661922	626057	639942	679105	651757	598478	681389	701955	700326	670537
Bradi2g33676.1	0.143153	0.16553	0.0536238	0.695333	0.861148	0.916427	0.0536238	0.898458	0.57266	0.57266	0.83604	0.879539	0.898458	MSVVGFDLGNESCIVGVARQRGIDVVLNEESKRETPAIVCFGDKQRFIGTAGAANSTMNPKNSISQIKRLLGRKFTDPEVQHDIQSFPFRVSEGPDGFPLVHARYLGEERTFTPTQLLAMVLSNLKGIAEGNLNTAVSDCCIGIPVYFTDLQRRAVLDAATIAGLRPLRLFHETTATALAYGIYKTDLPENDQLNVAFVDIGHASMQVSIVGYKKGQLKMLSHAYDRSLGGRDFDEALFKHFAAKFKEEYKIDVYQNARACIRLRVACEKLKKMLSANPEAPMNIECLMDEKDVRGFIKRDEFEQISGPVLERVKGPLDKALAEAGLTTESVHFVEVVGSGSRVPAIMKIITEFFGKEPRRTMNASECVARGCALQCAILSPTFKVREFQVNEGFPFSV…	529277	373012	347595	162309	353048	193186	219942	148239	247340	202177	290914	222333	314101	353301	295162	342334	280562	349175	270008	310520	351392	244916	336347	336142	317199
Bradi2g34240.1	0.000885656	0.00190247	0.999393	0.924679	0.0128575	0.00248811	0.00248811	2.18258	0.953557	0.953557	1.1726	1.95562	2.18258	MAANGGMVAGSHNRNEFVMIRHDGDAPAPGKQAKGVNGQVCQICGDTVGVSATGDVFVACNECAFPVCRPCYEYERKEGNQCCPQCKTRYRRLKGSPRVQGDEEEEDVDDLDNEFNYKQGNGKGPEWQLHGQGEDIDLSSSSRHEPHHRIPRLTSGQQLSGDIPDASPDRHSIRSPTSSYVDPSVPVPVRIVDPSKDLNSYGINSVDWKERVESWRVKQDKNMMQVTNKYPDARGGGDMEGTGSNGEDMQMVDDARLPLSRIVPIPANQLNLYRIVIILRLIILCFFFQYRVTHPVPDAYGLWLVSVICEIWFALSWLLDQFPKWYPINRETYLDRLALRYDREGEPSQLAPIDIFVSTVDPLKEPPLITANTVLSILAVDYPVDKVSCYVSDDGSAML…	13044.1	5776.9	8358	4960.86	8034.97	7505.41	8346.78	7081.4	7713.66	7661.81	9199.27	8617.96	6739.1	13131	9421.84	12051.2	12605.7	20654.3	17542.2	15713.4	21904.5	17554.9	17484.5	13203.9	17537
Bradi2g34440.3	1.28548e-07	1.61809e-06	0.0192015	4.25767e-05	4.76636e-09	3.00375e-08	4.76636e-09	0.801504	0.349422	0.801504	0.595998	0.349422	0.438529	MGRRPARCYRQIKNKPYPKSRYCRGVPDPKIRIYDVGMKKKGVDEFSHCVHLVSWEKENVSSEALEAARIACNKYMTKSAGKDAFHLRVRVHPFHVLRINKMLSCAGADRLQTGMRGAFGKPQGVCARVAIGQVLLSVRCKPNNAVHATEALRRAKFKFPGRQKIIESRKWGFTKHNRNDYLKFKSEGRIVSDGVNAKLLGCHGRLSARAPGQAFLTAA	83760.9	101975	98433.8	97738.9	95477	56684.2	87422.4	76205.7	85788.7	76525.2	54312.9	63634.6	50718.2	58950.7	56904.1	39776.8	31160.1	32354.9	30155.2	33361.8	33789	46322	42154.1	45212.6	41869.4
Bradi2g34450.1	0.551239	0.569824	0.787785	0.950879	0.769991	0.99999	0.769991	1.06267	0.962927	1.0607	0.962927	1.06267	1.00403	MGGCVGKDRGIVEDKLDYKGGNVHNITTKEEWDQKIEEANKDGKIVVANFSASWCGPCRVIAPVYGDMSKAYPQLMFLTIDVDDLMDFSSTWDIRATPTFFFLKNGQQIDKLVGANRPELEKKVQALAEGS	241900	173382	205469	223356	211027	207550	217193	250615	219982	223835	195872	227741	182110	207091	203203	237555	247905	202327	209220	224252	214299	203966	217623	211625	211878
Bradi2g34580.1	0.00438036	0.00769415	0.498383	0.99669	0.00666255	0.0524474	0.00666255	1.0216	0.683488	0.888137	1.0216	0.683488	0.773649	MGTSGSKGMDGVGGVGAAAAAGGAGIQDEDGVGGAGMESWHGGAQLYVSLKMENARIIGDLVPHVYGSEPIIGSWDPARALAMERELASMWELSFVVPPDHETLYFKFLLKPKDAETPCVIEEGPTRLLTGGMLEGDVRVANFRLNGDDEVLEFRVFNKADIVSPLELAASWRVYKENFQPSQVRGIPDVSINVAPAHATEDGSGSSLELDLEHYVVPTPTAPPTEYAANLAATPASLIQPGALWTNDMLLSDGIQSPSSASADFRDHSYHNKDIEASVADSSKKLQVCGMVESKSVGTLIPLQKQDRQKGLYVDTGVVSPKLGKSFSACALASGLSFASTKAMPEAAGAVAAAAVADRLHGSKEDRKLAIVLVGLPARGKTFTAVKLTRYLRWLGHET…	219938	158163	221356	202820	200569	160046	191882	169503	191102	178133	202733	179741	179331	257803	204902	143152	155061	132564	117570	137087	155460	142951	166098	156172	155170
[truncated: 747 more rows]
